# Supplementary material for: Cyclic di-GMP contributes to adaption and virulence of Bacillus thuringiensis through a riboswitch-regulated collagen adhesion protein
Source: PubMed Central journal article supplement (PMC4933901; doi:10.1038/srep28807), 2016-07-06
Supplement: srep28807-s1.pdf [file srep28807-s1.pdf]

## SUPPORTING INFORMATION

### **Cyclic di-GMP contributes to adaption and virulence of *Bacillus thuringiensis* through a riboswitch-regulated collagen adhesion protein**

Qing Tang<sup>1</sup>, Kang Yin<sup>1</sup>, Hongliang Qian<sup>1</sup>, Youwen Zhao<sup>1</sup>, Wen Wang<sup>1</sup>, Shan-Ho Chou<sup>2</sup>,  
Yang Fu<sup>1</sup>, Jin He<sup>1,3,\*</sup>

<sup>1</sup> State Key Laboratory of Agricultural Microbiology, College of Life Science and Technology, Huazhong Agricultural University, Wuhan, Hubei 430070, PR China

<sup>2</sup> Institute of Biochemistry, and NCHU Agricultural Biotechnology Center, National Chung Hsing University, Taichung 40227, Taiwan

<sup>3</sup>Key Laboratory of Agro-Microbial Resource and Development, Ministry of Agriculture, Wuhan, Hubei 430070, PR China.

\*State Key Laboratory of Agricultural Microbiology, College of Life Science and Technology, Huazhong Agricultural University, Wuhan, Hubei 430070, PR China.  
Email: hejin@mail.hzau.edu.cn

## Supplementary Figures:

| Bacteria                                                | Arrangement | Bc2 RNA identities | Cap identities  | Bc2 RNA location                      |
|---------------------------------------------------------|-------------|--------------------|-----------------|---------------------------------------|
| <b>Whole genome sequences</b>                           |             |                    |                 |                                       |
| <i>B. thuringiensis</i> BMB171                          |             |                    |                 |                                       |
| <i>B. cereus</i> AUCC 14579                             |             | 92/92 (100%)       | 1318/1351 (97%) | NC_004722.1 (1036786-1036878)         |
| <i>B. thuringiensis</i> Al Hakam                        |             | 92/92 (100%)       | 1282/1351 (97%) | NC_008600.1 (1077635-1077727)         |
| <i>B. cereus</i> B4264                                  |             | 92/92 (100%)       | 1310/1351 (97%) | NC_011725.1 (1063140-1063232)         |
| <i>B. cereus</i> G9842                                  |             | 92/92 (100%)       | 1288/1351 (97%) | NC_011772.1 (1039145-1039237)         |
| <i>B. thuringiensis</i> CT-43                           |             | 92/92 (100%)       | 1288/1351 (97%) | NC_014937.1 (1087308-1087400)         |
| <i>B. weihenstephanensis</i> KBAB4CT-43                 |             | 89/87 (97%)        | 1201/1332 (97%) | NC_010184.1 (1053373-1053463)         |
| <b>Contigs</b>                                          |             |                    |                 |                                       |
| <i>B. thuringiensis</i> serovar israelensis ATCC 35646  |             | 92/92 (100%)       |                 | sq1919 (18087-17995)                  |
| <i>B. cereus</i> AH1134                                 |             | 92/92 (100%)       |                 | gcontig_1113129653792 (755065-755157) |
| <i>B. cereus</i> 03BB108                                |             | 92/92 (100%)       |                 | gcontig_1112316047305 (164457-164549) |
| <i>B. cereus</i> ATCC 10876                             |             | 92/92 (100%)       |                 | contig00511 (9709-9801)               |
| <i>B. cereus</i> BGSC 6E1                               |             | 92/92 (100%)       |                 | contig00601 (39308-39400)             |
| <i>B. cereus</i> 172560W                                |             | 92/92 (100%)       |                 | contig00006 (63719-63811)             |
| <i>B. cereus</i> m1550                                  |             | 92/92 (100%)       |                 | contig01013 (24906-24998)             |
| <i>B. cereus</i> BDRD-ST24                              |             | 92/92 (100%)       |                 | contig00793 (28379-28471)             |
| <i>B. cereus</i> BDRD-Cer4                              |             | 92/92 (100%)       |                 | contig00050 (53577-53669)             |
| <i>B. cereus</i> Rock1-15                               |             | 92/92 (100%)       |                 | contig00008 (48366-48458)             |
| <i>B. cereus</i> Rock4-2                                |             | 92/92 (100%)       |                 | contig00206 (86586-86678)             |
| <i>B. cereus</i> F65185                                 |             | 92/92 (100%)       |                 | contig00531 (60370-60462)             |
| <i>B. cereus</i> AH676                                  |             | 92/92 (100%)       |                 | contig00295 (20960-21052)             |
| <i>B. thuringiensis</i> B1407                           |             | 92/92 (100%)       |                 | contig00021 (51741-51833)             |
| <i>B. thuringiensis</i> serovar thuringiensis T01001    |             | 92/92 (100%)       |                 | contig00036 (51739-51831)             |
| <i>B. thuringiensis</i> serovar sotto T04001            |             | 92/92 (100%)       |                 | contig01666 (3611-3519)               |
| <i>B. thuringiensis</i> serovar pakistani T13001        |             | 92/92 (100%)       |                 | contig01136 (25666-25758)             |
| <i>B. thuringiensis</i> serovar kurstaki T03a001        |             | 92/92 (100%)       |                 | contig00605 (5539-5631)               |
| <i>B. thuringiensis</i> serovar berliner ATCC 10792     |             | 92/92 (100%)       |                 | contig00251 (51741-51833)             |
| <i>B. thuringiensis</i> serovar huazhongensis BGSC 4BD1 |             | 92/92 (100%)       |                 | contig00561 (25055-25147)             |
| <i>B. thuringiensis</i> IBL 200 contig00164             |             | 92/92 (100%)       |                 | contig00164 (28071-28163)             |
| <i>B. thuringiensis</i> IBL 4222 contig00054            |             | 92/92 (100%)       |                 | contig00054 (24785-24877)             |
| <i>B. cereus</i> SJ1                                    |             | 92/92 (100%)       |                 | (265043-264951)                       |
| <i>B. cereus</i> MM3                                    |             | 91/91 (100%)       |                 | contig00449 (58482-58574)             |
| <i>B. cereus</i> BDRD-ST196                             |             | 89/89 (98%)        |                 | contig01724 (57330-57422)             |
| <i>B. cereus</i> AH1272                                 |             | 92/92 (100%)       |                 | contig00103 (4951-4859)               |
| <i>B. cereus</i> AH1273                                 |             | 91/91 (100%)       |                 | contig00259 (5594-5686)               |
| <i>B. cereus</i> AH603                                  |             | 89/89 (98%)        |                 | contig00195 (9234-9324)               |

**Figure S1 Taxonomy of species containing Bc2 RNAs.** The taxonomy of each organism containing a putative Bc2 RNA is listed. The identities of each Bc2 RNA and Cap with that in BMB171 are listed. Bc2 RNA-*cap* architecture in species whose genomes have been fully sequenced are demonstrated.



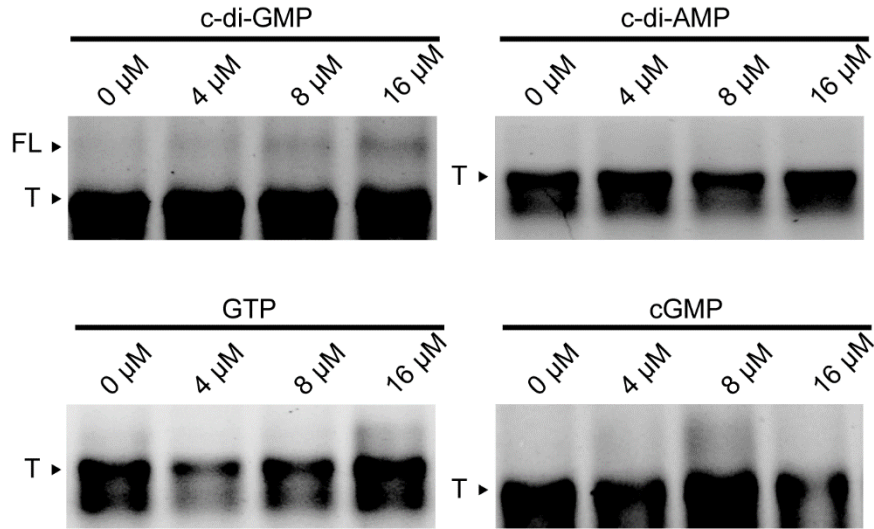

**Figure S3 C-di-GMP specifically promotes Bc2 RNA transcription read-through.** FL and T denote the full length transcripts and terminated transcripts of *in vitro* transcription termination assays, respectively. *In vitro* transcription was initiated by adding 0.25 U of *E. coli* RNA polymerase holoenzyme into transcription mixtures containing 0.1 pmol of DNA template, 5 mM ATP, CTP, GTP and UTP, 20 mM MgCl<sub>2</sub>, 0.1 mM EDTA, 1 mM dithiothreitol and 10% glycerol. Reaction mixtures were also supplemented with c-di-GMP, c-di-AMP, GTP and cGMP at indicated concentrations. The reaction mixture was incubated at room temperature for 30 min and stopped by adding heparin at a final concentration of 0.5 mg/μl. The products were examined by 2% agarose gel and imaged by Molecular Imager (Bio-Rad, USA).

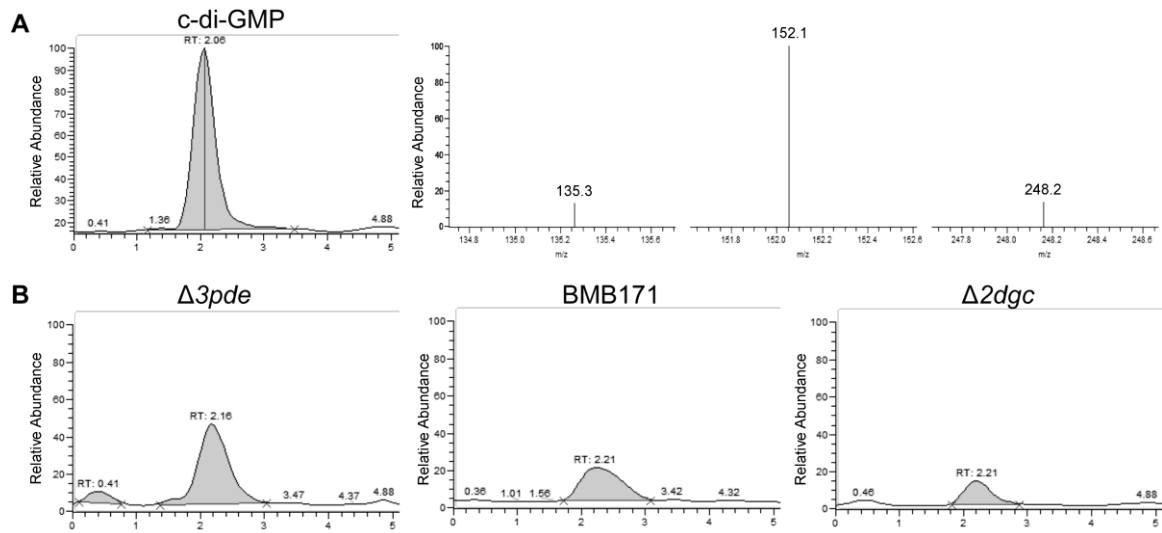

**Figure S4 Quantification of intracellular c-di-GMP concentration by LC-MS/MS. (a)** LC-MS/MS chromatogram of the c-di-GMP standard detected using the m/z fragments at 135.3, 152.25 and 248.2; **(b)** Determination of c-di-GMP extracted from  $\Delta 3pde$ , BMB171, and  $\Delta 2dgc$  culture.

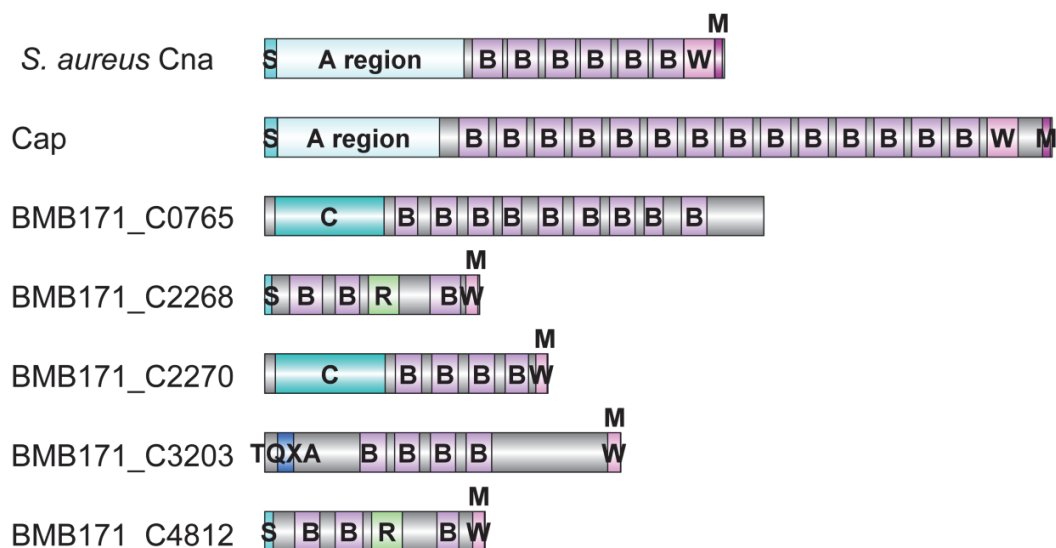

**Figure S5 Domain organization of *S. aureus* Cna and collagen adhesion proteins in *B. thuringiensis* BMB171.** The collagen binding A region is followed by B repeats. S, signal peptide; W, cell wall anchoring region containing the LPXTG motif; M, transmembrane segment; and C, choice-of-anchor A domain; TQXA, TQXA domain which occurs in surface-expressed proteins of Gram-positive bacteria; R, fimbrial isopeptide formation D2 domain. BMB171\_C0765, BMB171\_C2268, BMB171\_C2270, BMB171\_C3203, and BMB171\_C4812 are encoded by *BMB171\_C0765* (new tag *BMB171\_RS04480*), *BMB171\_C2268* (new tag *BMB171\_RS12455*), *BMB171\_C2270* (new tag *BMB171\_RS12465*), *BMB171\_C3203* (new tag *BMB171\_RS17455*), and *BMB171\_C4812* (new tag *BMB171\_RS26025*), respectively. Prediction of transmembrane helices in proteins was performed by TMHMM Server v. 2.0. Signal peptide/non-signal peptide prediction was performed by SignalP 4.1 Server.

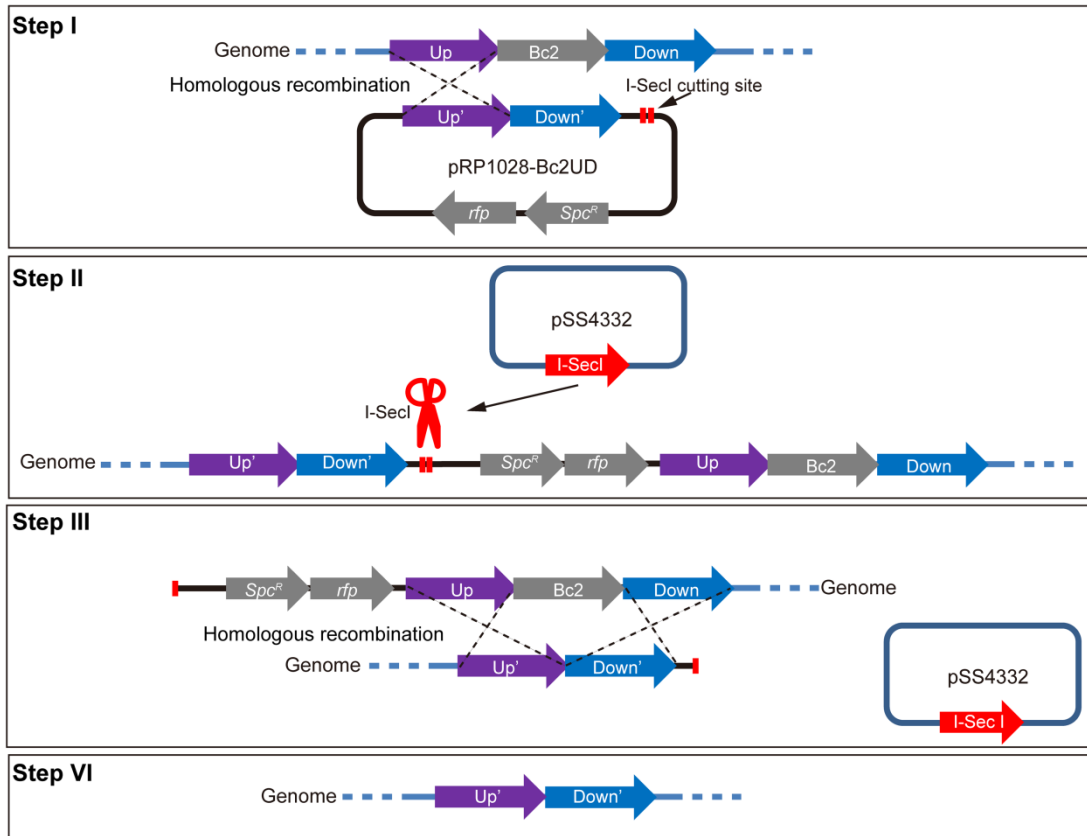

**Figure S6 Scheme of the I-SceI mediated markless gene knockout procedure.** Step I, the upstream and downstream of Bc2 RNA was fused together by overlap-PCR and cloned into pRP1028 to create recombining plasmid pRP1028-Bc2UD. Then the recombining plasmid was electroporated into BMB171 strain. Integration of plasmid pRP1028-Bc2UD into the chromosome through homologous recombination was induced by high temperature (37°C). Step II, plasmid pSS4332 was electroporated into the recombining strain. I-SceI restriction enzyme synthesised by pSS4332 cleaved the recombination genome at I-SceI cutting site. Step III, homologous recombination was induced by the break DNA. Step VI, the redundant pSS4332 plasmid was removed using continuous passage at 28°C in LB broth, resulting in a markerless Bc2 RNA deletion strain.

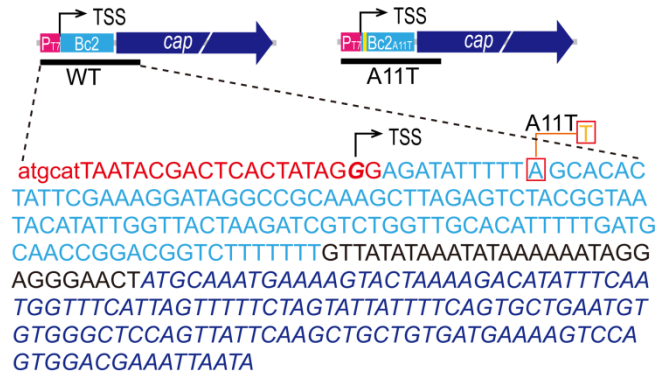

**Figure S7 Schematic representation of the DNA templates used in *in vitro* transcription termination assays.** Nucleotides in red denote T7 promoter, nucleotides in light blue denote Bc2 RNA sequence, and nucleotides in blue denote the coding region of *cap*. The TSS of *cap* was highlight by bent arrow.



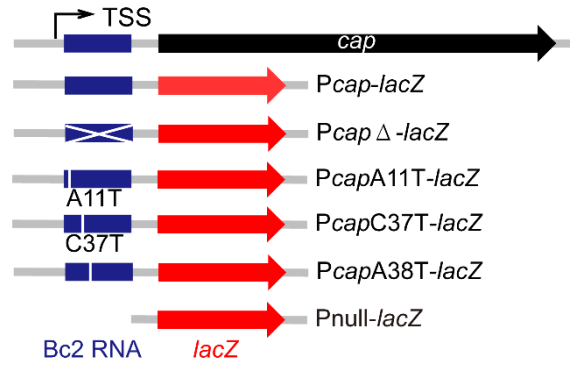

**Figure S8 Schematic representation of the *Pcap-lacZ*, *PcapΔ-lacZ* and *Pnull-lacZ* transcriptional reporter vectors.** *Pcap-lacZ*, pHT1K plasmid contains the 5'-UTR DNA region of *cap* gene encompassing Bc2 RNA sequence (-64—+249) which is fused with *lacZ*; *PcapΔ-lacZ*, pHT1K contains the 5'-UTR DNA region of *cap* gene lacking the Bc2 RNA sequence (-64—+76; +198—+249) which is fused with *lacZ*; *PcapA11T-lacZ*, *PcapC37T-lacZ* and *PcapA38T-lacZ* are pHT1Ks carrying 5'-UTR DNA region of *cap* with site mutants; *Pnull-lacZ*, pHT1K contains the promoterless *lacZ*.

## Supplementary Tables :

**Table S1 Primers used in this study**

| primers                           | Primer sequences (5'-3')                         | Purposes                    | Origins   |
|-----------------------------------|--------------------------------------------------|-----------------------------|-----------|
| <i>cap</i> -U-F                   | ACAT <u>GGTACCT</u> CAGAGAGGAAAGGGAGATGGGTT      | <i>cap</i> gene<br>knockout | This work |
| <i>cap</i> -U-R                   | ATTC <u>GGATCC</u> AGTTCCTCCTATTTTTATATT         | <i>cap</i> gene<br>knockout | This work |
| <i>cap</i> -D-F                   | ATACTCTAGATAAAAGGTGAAAAGGTATCCTCAAAG             | <i>cap</i> gene<br>knockout | This work |
| <i>cap</i> -D-R                   | AGATA <u>AAGCTT</u> AAACGATGATTCTCTTCTCTTG       | <i>cap</i> gene<br>knockout | This work |
| <i>cap</i> -specific outer primer | GCATATCAATTGTGAATTGATCTCC                        | 5'-RACE<br>analysis         | This work |
| <i>cap</i> -specific inner primer | GGCTTGATACGGTTCAGATGTCGTG                        | 5'-RACE<br>analysis         | This work |
| 5'-RACE Outer Primer              | CATGGCTACATGCTGACAGCCTA                          | 5'-RACE<br>analysis         | This work |
| 5'-RACE Inner Primer              | CGC <u>GGATCC</u> ACAGCCTACTGATGATCAGTCGATG      | 5'-RACE<br>analysis         | This work |
| <i>Pcap</i> -F                    | CATG <u>CCATGG</u> ACCATTGCTTCTTTAATGTAGTG       | $\beta$ -gal assays         | This work |
| <i>Pcap</i> -R                    | ACC <u>GGATCC</u> TTTAGTACTTTTCATTTGCATAGTTCCCTC | $\beta$ -gal assays         | This work |
| Bc2-Overlap-F                     | GAAACAAAAAAGAATAAAGTTATATAAATATAAAAAATAGGAG      | Overlap PCR                 | This work |
| Bc2-Overlap-R                     | TTTTATATTTATATAACTTTATTCTTTTTTGTTCATTTTCCTC      | Overlap PCR                 | This work |
| RT <i>gap</i> -F                  | TTTTGCTAGCGCTTTCGCAG                             | qPCR assays                 | This work |
| RT <i>gap</i> -R                  | TAGCGCCTGTTGTGAAGGTG                             | qPCR assays                 | This work |
| RT <i>cap</i> -F                  | GACAGAGAGACCGAAGCCAC                             | qPCR assays                 | This work |
| RT <i>cap</i> -R                  | ACTCATGCCCAGGTCCTAATG                            | qPCR assays                 | This work |
| RTBc2-F                           | CGTCCAGACGGTATAGTAATATTTG                        | qPCR assays                 | This work |
| RTBc2-R                           | AGCTTTGCGGCCTATCCTTT                             | qPCR assays                 | This work |
| Bc2-U-F                           | CG <u>ACGCGT</u> CTAAATTAACCTTAGAAGCAGTG         | Bc2 knockout                | This work |
| Bc2-D-R                           | CG <u>GGATCC</u> ATTTACATATACAAGCCAATCAGC        | Bc2 knockout                | This work |

|        |                                           |               |           |
|--------|-------------------------------------------|---------------|-----------|
| A11T-b | CTTTCGAATAGTGTGC <u>A</u> AAAAATATCT      | Site mutation | This work |
| A11T-c | AGATATTTTTT <u>T</u> GCACACTATTCGAAAG     | Site mutation | This work |
| C38T-b | CGAAAGGATAGGCCG <u>T</u> AAAAGCTTAGAGTCTA | Site mutation | This work |
| C38T-c | TAGACTCTAAGCTTT <u>A</u> CGGCCTATCCTTTTCG | Site mutation | This work |
| A38T-b | CGTAGACTCTAAGCTT <u>A</u> GCGGCCTATC      | Site mutation | This work |
| A38T-c | GTATGGCCGC <u>T</u> AAGCTTAGAGTCTACG      | Site mutation | This work |

---

**Table S2 c-di-GMP-I riboswitch**

| Samples                                  | Genome         | Location        | Sequence*                                                                                         |
|------------------------------------------|----------------|-----------------|---------------------------------------------------------------------------------------------------|
| [Cellvibrio] gilvus ATCC 13127           | CP002665.1     | 3443557-3443482 | TCAGCGAAACGGCAAACCTCCGCGAGGAGGGGACGCAAAGCCACGGGACCCACGACGGTCAGCCGGGCTACCGAA                       |
| [Cellvibrio] gilvus ATCC 13127           | CP002665.1     | 1473921-1473997 | CAGCGACAACGGCAAACCTCCGCAAGGAGGGGACGCAAAGCCAACGGGACCCACGACGGTCAGCCGAGCTACCGAA                      |
|                                          |                |                 |                                                                                                   |
| Acaryochloris marina MBIC11017           | CP000828.1     | 4797700-4797614 | TCCTCGAAACGGCAACTTGTCTCGAAAGAGCAAGACGCAAATTAACGAGTCTAACCCTTTATAGGCATGATGGTCGTTAATACCGAA           |
| Acaryochloris marina MBIC11017           | CP000828.1     | 1721607-1721514 | TCCCCGAAATGGCAACTTGCACCGAAAGGGTAAGGCGCAAATTAGCAGGCCTAAAATCCAAGCATTACGGGGTATGGATGCTGCTAGTGTGCGAA   |
| Acaryochloris sp. CCMEE 5410 contig00482 | AFEJ01000324.1 | 22061-21975     | TCCTCGAAACGGCAACTTGTCTCGAAAGAGCAAGACGCAAATTAACGAGTCTAACCCTTTATAGGCATGATGGTCGTTAATACCGAA           |
| Acaryochloris sp. CCMEE 5410 contig00499 | AFEJ01000341.1 | 4160-4067       | TCCCCGAAATGGCAACTTGCACCGAAAGGGTAAGACGCAGATTAGCAGACCTAAAGTCCAAGCATTACGGGGTATGGATGCTGCTAGTGTGCGAA   |
|                                          |                |                 |                                                                                                   |
| Acetivibrio cellulolyticus CD2 ctg00137  | AEDB01000015.1 | 21591-21687     | TATGAAACAGGGCAAAGTCGTTGAAAGACGGCGACGCAAAGCTGTGGGTCTAACGTTTGGGGAAGATGCCTTGAACTACGATTGCCAAGCTGCCATT |
| Acetivibrio cellulolyticus CD2 ctg00142  | AEDB01000040.1 | 12119-12214     | TATGAAACAGGGCAAAATCATTGAAAAATGATGACGCAAAGCTATGGGTCTAAGTTAAGGATTATATATCCTTGATATGATCGCCAAGTTGCCATT  |
| Acetivibrio cellulolyticus CD2 ctg00148  | AEDB01000011.1 | 99531-99625     | TATGAAACAGGGCAAAGTTGTCGAAAGGCAATGACGCAAAGCCTTGGGTCTAAAGCTGAGACGAAAGTCAAAGCTAAGATAGCCGGGTGCCATT    |
| Acetivibrio cellulolyticus CD2 ctg00149  | AEDB01000061.1 | 5161-5244       | CATTTGAAATGGTAAACCTGGTGAAAACCAGTGACACAAAGCTACGGGTCTAAGGTCTTTGACTAAGACAGCCGAGTTGCCGAA              |

|                                            |                |                 |                                                                                                   |
|--------------------------------------------|----------------|-----------------|---------------------------------------------------------------------------------------------------|
| Acetivibrio cellulolyticus<br>CD2 ctg00157 | AEDB01000070.1 | 14624-14708     | ATTTGTAAAAGGCAAATCTATCGAAAGATAGAGACGCAAACTACGGGTCTACGGTCGCTTGACTACGACAGCCGGGTGCCAAG               |
| Acetivibrio cellulolyticus<br>CD2 ctg00157 | AEDB01000070.1 | 14797-14882     | TTTCGAAAATGGCAAACCTCAATGAAAATTGAGGACGCAAACTACAGGTCTACGGGTTTCATTACTATGATGGCTGAGTTACCGAA            |
| Acetohalobium arabaticum<br>DSM 5501       | CP002105.1     | 239557-239640   | CCTCAAAAAAGGCACACTTGCTGAAAAGTAAGGTCGCAAAGTCTTGAGTCTAAAGCATAAAGCCATGACTGTCGGACTGCTGAA              |
| Acetohalobium arabaticum<br>DSM 5501       | CP002105.1     | 1744836-1744745 | AACTAGAAAGGGCACACTTATCGAAAGGTAAGGCCGCAAAGCTTCAAATCTACAGTGCAGTATAAAGGCACTATGATAGTTGGGCTACCACA      |
| Acetonea longum DSM<br>6540 Contig00098    | AFGF01000098.1 | 31377-31462     | TAATAAACACGGCAAACCTTATTGAAAAATAAGGACGCAAAGCTATGGGTCTACGTACTTTAAGTATATGGCTGCCAGGTTGCAAAA           |
|                                            |                |                 |                                                                                                   |
| Acholeplasma laidlawii<br>PG-8A            | CP000896.1     | 1183288-1183213 | ATTAATATTGGCAAACCTATATGAAAATATAGGGCGCAAACTATAGGGCCTTGAAAATGGTAGCCAGCTGCATAA                       |
| Acholeplasma laidlawii<br>PG-8A            | CP000896.1     | 1029409-1029330 | AAGATTAAAAGGCAAACCTTAAGGTAACCTTAAGGACGCAAACTAAAGGGTCTAATTAGTAATAGACAGCCAGTTGCATCG                 |
| Acholeplasma laidlawii<br>PG-8A            | CP000896.1     | 1036967-1036891 | TAAAGTTTTTGGCAAATAGGGTAACCTAATGACGCAAACTATAGGGCCTATATATTAGGCAGCCAGTTGCACTT                        |
| Acholeplasma laidlawii<br>PG-8A            | CP000896.1     | 1037127-1037052 | TCATAAAAAAGGCAAAATTAGGGTAACCTAATGACGCAAACTACAGGGTCCAAATTAGGATAGCCAGTTGCTATA                       |
| Acidaminococcus<br>fermentans DSM 20731    | CP001859.1     | 1537998-1538074 | AAAACCTTTTGGCAAACCTGGAGAAATCCAGCGACGCAAAAGCTAACAGGGCCTGTAAAATGGCAGCCAGCTGCACAG                    |
| Activated sludge<br>metagenome contig06636 | AERA01006587.1 | 268-363         | TTTCGAAAAGGCAAACCTGCGTGAAAGCGCAGGACGCAAAAGCCACAAGCCTAAGGGCGCCGCTGAAATCGACGCCTATGGTGGTTGGGTTGCCGAT |
| Activated sludge<br>metagenome contig19732 | AERA01019441.1 | 138-228         | AAGCGATAAGGGCAAACCATCCGAAAGGGTGGGACGCAAAAGCCTTCGACCTAAGTGCTGAGAAATCAGCATAACGGTGGCCGGGTTACCGAA     |

|                                                                     |                |                 |                                                                                           |
|---------------------------------------------------------------------|----------------|-----------------|-------------------------------------------------------------------------------------------|
| Activated sludge<br>metagenome contig27665                          | AERA01026525.1 | 212-299         | CACCGACAAGGGCAAACCATGCGAAAGCATGGGACGCAAAGCCAGCGGCCTAAGTCCCCCGGGGGATAAGGCGGCAGGGTTGCCGAA   |
|                                                                     |                |                 |                                                                                           |
| Aeromonas caviae Ae398                                              | CACP01000024.1 | 108781-108867   | TGTGCAAAAAGGCAAACCGGATGAAAGTCCGGGACGCAAAGCTTCCGGTCTAAGGGTCTGCGTACCTAGGATAGCGGGGCCACCACA   |
| Aeromonas caviae Ae398                                              | CACP01000017.1 | 7890-7805       | GTAGTCATTTGGCAAACCTGGTTGAAAGGCCAGGACGCAAAGCCTCCGGTCTAAAGACAAGCTGTCCAGGATAGCGGGGTTGCAGCA   |
| Aeromonas caviae Ae398                                              | CACP01000095.1 | 68797-68714     | CCAGGCAAAGGGCAAACCGGCAGTGATGCCGGGACGCAAAGCCTCCGATCTGTCCCATCCGGGCCAGACAGCGGGGTTACCCAG      |
| Aeromonas hydrophila chiA<br>gene for chitinase precursor           | AB253741.1     | 579-665         | TGTGCAAAAAGGCAAACCGGATGAAAGTCCGGGACGCAAAGCTTCCGGTCTAAGGGTCTGCGTACCTAGGATAGCGGGGCCACCACA   |
| Aeromonas hydrophila<br>chitinase 92 (chi92) gene                   | AF181852.1     | 295-381         | TGTGCAAAAAGGCAAACCGGATGAAAGTCCGGGATGCAAAGCTTCCGGTCTAAGGGTCTGCGTACCTAGGATAGCGGGGCCACCACA   |
| Aeromonas hydrophila<br>chitinase gene                              | AF099928.1     | 353-438         | GTGCAAAAAGGCAAACCGGATGAAAGTCCGGGACGCAAAGCCTCCGGTCTAAGGGTCAAAGCACCTAGGATAGCGGGGCCACCACA    |
| Aeromonas hydrophila<br>extracellular chitinase ChiA<br>(chiA) gene | AF251793.1     | 101-188         | GTGCAAAAAGGCAAACCGGATGAAAGTCCGGGACGCAAAGCCTCCGGTCTAAGGGTCAAAGCACCTAGGATAGCGGGGCCACCACA    |
| Aeromonas hydrophila<br>FliML (fliML)                               | DQ124694.1     | 7633-7720       | GCATGATAAAGGCAAACCTGAACTGAAAAGTCAGGACGCAAAGCCTCCGGTCTAATAGCTGCAATGCTAATGATAGCGGGGTTACCAAG |
| Aeromonas hydrophila<br>subsp. hydrophila ATCC<br>7966              | CP000462.1     | 551681-551596   | TAGAGTAAAGGGCAAACCGGTCGAAAGGTCGGGACGCAAAGCCACCGGTCTAAGGGTTCATAACCTAAGACAGCGGAGCTGCCATC    |
| Aeromonas hydrophila<br>subsp. hydrophila ATCC<br>7966              | CP000462.1     | 649413-649328   | GTAGTCATTTGGCAAACCTGGTTGAAAGGCCAGGACGCAAAGCCTCCGGTCTAAAGACATGTCTCCAGGATAGCGGGGTTGCCACA    |
| Aeromonas hydrophila<br>subsp. hydrophila ATCC                      | CP000462.1     | 1055622-1055709 | TTGTGCAAAAAGGCAAACCGGATGAAAGTCCGGGACGCAAAGCTTCCGGTCTAAGGGTCAGCAGTACCTAAGATAGCGGGGCCACCACA |

|                                                     |                |                 |                                                                                           |
|-----------------------------------------------------|----------------|-----------------|-------------------------------------------------------------------------------------------|
| 7966                                                |                |                 |                                                                                           |
| Aeromonas hydrophila<br>subsp. hydrophila ATCC      | CP000462.1     | 3873138-3873053 | CCAGGTAAAGGGCAAACCGGTCGAGATGCCGGGACGCAATGCCTCCGGTCTTCAGATCGTGCATCCAGATAGCGGGGCTTCCCAG     |
| 7966                                                |                |                 |                                                                                           |
| Aeromonas salmonicida<br>subsp. salmonicida 01-B526 | AGVO01000016.1 | 110684-110771   | TTGTGCAAAAGGCAAACCGGACGAAAGTCCGGGACGCAAAGCCTCCGGTCTAAGGGTCAGCAGTACCTAAGATAGCGGGGCCACCACA  |
| Contig016                                           |                |                 |                                                                                           |
| Aeromonas salmonicida<br>subsp. salmonicida 01-B526 | AGVO01000028.1 | 155902-155987   | GTAGTCATTTGGCAAACCTGGTTGAAAGGCCAGGACGCAAAGCCTCCGGTCTAAAGACATGTCTGCCAGGATAGCGGGGTTGCCACA   |
| Contig028                                           |                |                 |                                                                                           |
| Aeromonas salmonicida<br>subsp. salmonicida 01-B526 | AGVO01000032.1 | 21104-21017     | GCATGATAAAGGCAAACCTGAACTGAAAAGTCAGGACGCAAAGCCTCCGGTCTAATAGCAGTAATGCTAATGATAGCGGGGTTACCAAG |
| Contig032                                           |                |                 |                                                                                           |
| Aeromonas salmonicida<br>subsp. salmonicida 01-B526 | AGVO01000049.1 | 105007-105093   | TAGAGTAAAGGGCAAACCGATCGAAAGTCCGGGACGCAAAGCCACCGGTCTAAGGGTGTAGATACCTAAGACAGCGGAGCTGCCAAC   |
| Contig049                                           |                |                 |                                                                                           |
| Aeromonas salmonicida<br>subsp. salmonicida 01-B526 | AGVO01000058.1 | 154133-154048   | CCAGGTAAAGGGCAAACCGGTCGAAATGCCGGGACGCAATGCCTCCGGTCTCCAGATCAGTCGATCCAGATAGCGGGGCTTCCCAG    |
| Contig058                                           |                |                 |                                                                                           |
| Aeromonas salmonicida<br>subsp. salmonicida A449    | CP000644.1     | 610702-610617   | GTAGTCATTTGGCAAACCTGGTTGAAAGGCCAGGACGCAAAGCCTCCGGTCTAAAGACATGTCTGCCAGGATAGCGGGGTTGCCACA   |
| Aeromonas salmonicida<br>subsp. salmonicida A449    | CP000644.1     | 365078-365165   | GCATGATAAAGGCAAACCTGAACTGAAAAGTCAGGACGCAAAGCCTCCGGTCTAATAGCAGTAATGCTAATGATAGCGGGGTTACCAAG |
| Aeromonas salmonicida<br>subsp. salmonicida A449    | CP000644.1     | 3594032-3593945 | TTGTGCAAAAGGCAAACCGGACGAAAGTCCGGGACGCAAAGCCTCCGGTCTAAGGGTCAGCAGTACCTAAGATAGCGGGGCCACCACA  |

|                                                                     |                |                 |                                                                                          |
|---------------------------------------------------------------------|----------------|-----------------|------------------------------------------------------------------------------------------|
| Aeromonas salmonicida<br>subsp. salmonicida A449                    | CP000644.1     | 4016040-4015954 | TAGAGTAAAGGGCAAACCGATCGAAAGGTCGGGACGCAAAGCCACCGGTCTAAGGGTGTAGATACCTAAGACAGCGGAGCTGCCAAC  |
| Aeromonas salmonicida<br>subsp. salmonicida A449                    | CP000644.1     | 899660-899745   | CCAGGTAAAGGGCAAACCGGTCGAAATGCCGGGACGCAATGCCTCCGGTCTCCAGATCAGTCGATCCAGATAGCGGGGCTTCCCAG   |
| Aeromonas veronii B565                                              | CP002607.1     | 3993876-3993961 | CTAGTCATTTGGCAAACCTGACCGAAAGGTCGGGACGCAAAGCCTCCGGTCTACAGACGTTTTGTCCAGGATAGCGGGGTTGCCACA  |
| Aeromonas veronii B565                                              | CP002607.1     | 2331357-2331435 | TATCCACCTCGCCACTCCCGATGTGAGTCGGGTTTCGAAAGCTACAGATCTCTACACCTGAGACGGCTGAGCTGCAGAT          |
| Aeromonas veronii B565                                              | CP002607.1     | 4488281-4488366 | GGGTGAAAAAGGCAAAGTGACCCGAAAGGGCGCGACGCAAAGCCACCGGTCTAAGGGAAAACACCTATGACAGCGGGGCTGCCCCC   |
| Aeromonas veronii B565                                              | CP002607.1     | 933949-934036   | TTGTGACAAGGGCAAACCGATTGAAAAGTCGGGACGCAAAGCTTCCGGTCTAAGGGTCAAGACGGCCTAGGATAGCGGGGCCACCACA |
| Aeromonas veronii B565                                              | CP002607.1     | 945796-945878   | CCAGGTAAAGGGCAAACCGGCAGTGATGTCGGGGCGCAATGCTTCCGGTCTCGATCGTGGATCCAGATAGCGGGGTTTCCCTG      |
| Aeromonas veronii B565                                              | CP002607.1     | 529899-529813   | TAGAGTAAAGGGCAAACCGATCGAAAGGTCGGGACGCAAAGCCACCGGTCTAAGGGTTTTGATACCTAAGACAGCGGAGCTGCCATC  |
| Aeromonas veronii B565                                              | CP002607.1     | 929482-929569   | GTAACCGAAGGGCAAACCGATCGCAAGATCGGGACGCAAAGCTTCCGGTCCAGGGATGAGCCGTACTTGAGATAGCGGGGCCACCACA |
|                                                                     |                |                 |                                                                                          |
| Alicyclobacillus<br>acidocaldarius LAA1 ctg162                      | ACCS01000020.1 | 37515-37600     | AGCGCATCAGGGCAAACCAACGGAAACGTTGGGACGCAAAGCTACGGGTCTACGGGGACTTGACCTAGGATCGCCGGGCTGCCGCT   |
| Alicyclobacillus<br>acidocaldarius LAA1 ctg162                      | ACCS01000020.1 | 42534-42619     | TGTTGGCAAGGGCAAACCCGTCCGAAAGCGGGGGCGCAAAGCCACGGGTCTACGGACGAAAGTCTATGGCAGCCGGGCTGCCGGA    |
| Alicyclobacillus<br>acidocaldarius LAA1 ctg48                       | ACCS01000010.1 | 51838-51922     | GTCGGTCAAAGGCAAACCTTCGCGAAAGCGGAGGACGCAAAGCTATAGGGACTCGACACGACGTGTCGTGCCAGCCAGCTGCCTGG   |
| Alicyclobacillus<br>acidocaldarius LAA1 ctg48                       | ACCS01000010.1 | 47507-47421     | GGCGTTTCAGGGCAAACCAACGGAAACGTTGGGACGCAAAGCTACGGGTCTACGGGGACTTGACCTAAGACCGCCGGGCTGCCGCT   |
| Alicyclobacillus<br>acidocaldarius LAA1 ctg6                        | ACCS01000033.1 | 24027-23944     | GTCGGTCAAAGGCAAACCTTCGCGCAAGCGGAGGACGCAAAGCTATAGGGGCTCGGCTATTATGCCGTGCCAGCCAGCTGCCTGA    |
| Alicyclobacillus<br>acidocaldarius subsp.<br>acidocaldarius DSM 446 | CP001729.1     | 23541-23626     | AGCGCATCAGGGCAAACCAACGGAAACGTTGGGACGCAAAGCTACGGGTCTACGGGGACTTGACCTAGGATCGCCGGGCTGCCGCT   |



|                                                                                        |            |                 |                                                                                             |
|----------------------------------------------------------------------------------------|------------|-----------------|---------------------------------------------------------------------------------------------|
| plasmid pAACI02                                                                        |            |                 |                                                                                             |
| Alicyclobacillus<br>acidocaldarius subsp.<br>acidocaldarius DSM 446<br>plasmid pAACI02 | CP001729.1 | 28673-28758     | TGTTGGCAAGGGCAAACCCGTCCGAAAGGCGGGGGCGCAAAGCCACGGGTCTACGGACGAAAGTCTATGGCAGCCGGGCTGCCGGA      |
| Alicyclobacillus<br>acidocaldarius subsp.<br>acidocaldarius Tc-4-1                     | CP002902.1 | 141355-141441   | GGCGTTTCAGGGCAAACCAACGGAAACGTTGGGACGCAAAGCTACGGGTCTACGGGGACTTGGACCTAAGACCGCCGGGCTGCCGCT     |
|                                                                                        |            |                 |                                                                                             |
| Aliivibrio salmonicida<br>LF11238 chromosome 1<br>complete genome                      | FM178379.1 | 2124498-2124416 | TCACGAACAGGGCAAACCTGTGCGAAAGCTCAGGACGCAAAGCTTCCGGCCTACGTATTATATAAGGTAGCAGGGTTGCCGAT         |
|                                                                                        |            |                 |                                                                                             |
| Alkaliphilus metalliredigens<br>QYMF                                                   | CP000724.1 | 1508597-1508682 | TAAATAAAAGGGCAAACCTTATCGAAAGATAAGGGCGCAAAGCCAAGGGTCTTCATCAATTGATTGATATGACAGCCGGTTGCAGAG     |
| Alkaliphilus metalliredigens<br>QYMF                                                   | CP000724.1 | 2944881-2944796 | AATAAGTAAAGGCAAACCATCGAAAGATGGTGACGCAAAGCCACGAATCTAAGTCGTTTGACGATAGGATAGTCGGGTTGCCTAT       |
| Alkaliphilus metalliredigens<br>QYMF                                                   | CP000724.1 | 1528254-1528342 | ACTTGATAAAGGCAAACCTTATTGAAAAATAAGGACGCAAAGCTATGGATCTAAGGGGATCTTTATTCCTATGATTGCCAGGTTGCCAAA  |
| Alkaliphilus metalliredigens<br>QYMF                                                   | CP000724.1 | 608582-608671   | CGTTGATAAGGGCAAACCTTACTGAAAAGTAAGGACGCAAAGCCATGAGTCTAAGGGAAGTTTTATTCCTATGATTGTCAGGTTGCAAAT  |
| Alkaliphilus metalliredigens<br>QYMF                                                   | CP000724.1 | 974342-974431   | TGTTGGTAAGGGCAAACCTTATTGAAAAATAAGGGCGCAAAGCTATGGATCTAAGGGAATATTATATTCCTATGATTGCCAGGTTGCCGAA |
| Alkaliphilus metalliredigens<br>QYMF                                                   | CP000724.1 | 3297141-3297052 | TATTGATAAGGGCAAACCTTATTGAAAAATAAGGACGCAAAGCTATGGATATAAGGGAAAACATCATTCTATGATTGCCAGGTTGCCGAA  |

|                                                                                  |                |                 |                                                                                                  |
|----------------------------------------------------------------------------------|----------------|-----------------|--------------------------------------------------------------------------------------------------|
| Alkaliphilus metalliredigens<br>QYMF                                             | CP000724.1     | 3839765-3839670 | AGAATGTAAAGGCAAACCATTTGCAAACAATGGGACGCAAAGCCAGGAACCTAAAGTGTGTTATAAAAAATATACCAAGATCGTCCGACTGCCATA |
| Alkaliphilus metalliredigens<br>QYMF                                             | CP000724.1     | 790814-790902   | TGTTGATAAAGGCAAACCTTATTGAAAAATAAGGACGCAAAGCTATGGATCTAAGGGAAGTTGTATTCTATGATTGCCAGGTTGCCGAA        |
| Alkaliphilus metalliredigens<br>QYMF                                             | CP000724.1     | 480071-480160   | TGTTGATAAAGGCAAACCTTATTGAAAAATAAGGGCGCAAAGCTATGGGTCTAAGGGAAGACACTATTCTATGATTGCCAGGTTGCCGGA       |
| Alkaliphilus metalliredigens<br>QYMF                                             | CP000724.1     | 1648997-1649082 | GAATACAGAGGGCAAACCTTATCGAAAGGTAAGGACGCAAAGCCATGGGCCTACATTCTAAACAGAAGATGGTAGCCGGTTGCAGAA          |
| Alkaliphilus metalliredigens<br>QYMF                                             | CP000724.1     | 3306870-3306785 | TATTAGTAAAGGCAAACCATTTGAAAGATGGTGACGCAAAGCCACGAGTCTAAGTCGTTATACGATATGATAGTCGGGTTGCCAAT           |
| Alkaliphilus oremlandii<br>OhILAs                                                | CP000853.1     | 1736753-1736673 | ACAATAAATGGGCAAACCTAGGGACGCAAAGCTTGAGTCTACGGTTATCTCAAAGATAATTACGATCGTTCAGCTGCATAG                |
|                                                                                  |                |                 |                                                                                                  |
| Anaerofustis stercorihominis<br>DSM 17244<br>A_stercorihominis-2.0.1_Co<br>nt214 | ABIL02000006.1 | 978360-978435   | ATTAAATATGGGCAAACTGTGGAACACAGTGACGCAAACTATAGGGCCTGTAAATGGCAGCCAGTTGCATTCT                        |
| Anaeromyxobacter<br>dehalogenans 2CP-1                                           | CP001359.1     | 1969289-1969371 | CACGCTTCAGGGCAATTCACCCGCACTTAGGGTGAAGCGCAAAGCCGCGGGTCCGGCGACGCCGGACGGCCGTGGCCGCCGTG              |
| Anaeromyxobacter<br>dehalogenans 2CP-C                                           | CP000251.1     | 2466924-2466841 | CACGCTTCAGGGCAATTCACCCGTACCCAGGGTGAAGCGCAAAGCCGCGGGTCCGGTGAACGCCGGACGGCCGTGGCCGCCGTG             |
| Anaeromyxobacter sp. K                                                           | CP001131.1     | 1916166-1916248 | CACGCTTCAGGGCAATTCACCCGCACGTAGGGTGAAGCGCAAAGCCGCGGGTCCGGCGACGCCGGACGGCCGTGGCCGCCGTG              |
|                                                                                  |                |                 |                                                                                                  |
| Anaerostipes caccae DSM<br>14662                                                 | ABAX03000002.1 | 4791-4701       | ATTATTTCATCGGTAAACTATTGAAAGATAGTGACACAAAGCCAAGGGTCTAAGGTCTTCCAAACGGGGATTATGACAGCCGGTTGCCACA      |

|                                                            |                |               |                                                                                               |
|------------------------------------------------------------|----------------|---------------|-----------------------------------------------------------------------------------------------|
| A_caccae-4.0.1_Cont13                                      |                |               |                                                                                               |
| Anaerostipes caccae DSM<br>14662<br>A_caccae-4.0.1_Cont13  | ABAX03000002.1 | 4503-4417     | TTTAATATTTAGTAAAACTATCGAAAGGTAGTGACACAAAGCCAAGGGTCTAAGATCTCTAAGAGATTACGATAGCCGGTTGCCGCA       |
| Anaerostipes caccae DSM<br>14662<br>A_caccae-4.0.1_Cont21  | ABAX03000005.1 | 231872-231785 | TTACATATTCAGTAAAACTGTCAAAAGGCAGTGGCACAAAGTCAAGGGTCTAAGATCTGATTACAGATTATGACAGCCGATTGCCGTA      |
| Anaerostipes caccae DSM<br>14662<br>A_caccae-4.0.1_Cont21  | ABAX03000005.1 | 232139-232052 | AATTTTCATCGGTAAAGCTGCCGAAAGGCAGTGACACAAAGCCAAGGGTCTAAAGTCTTACATAAGACTATGACAGCCGGTTGCCACA      |
| Anaerostipes caccae DSM<br>14662<br>A_caccae-4.0.1_Cont223 | ABAX03000014.1 | 396556-396464 | AAAATAAATAGGCAAAGCTGCCGAAAGGCAGTGACGCAAAGCTAAAGGGGCTATATCGTATAGGGAGTATGATCGTGCCAGCCAGCTGCCTCA |
| Anaerostipes caccae DSM<br>14662<br>A_caccae-4.0.1_Cont332 | ABAX03000024.1 | 381353-381269 | TTTATATTTTGGCAAACCGGGGAAATCCGGTGACGCAAAGCCAAGGGCTAAACCATTACTGGTACGGCAGCCGGTTGCTCCA            |
| Anaerostipes caccae DSM<br>14662<br>A_caccae-4.0.1_Cont7.1 | ABAX03000037.1 | 71311-71226   | TTACATATTGGGCAAAACAGGTGAAAGCCTGCGGCGCAAAGCTAAAGGGTCTAAGATTTTATTGATTATGACAGCCAGCTGCAGTT        |
| Anaerostipes sp.<br>3_2_56FAA cont2.102                    | ACWB01000102.1 | 21326-21413   | AATTTTCATCGGTAAAGCTGCCGAAAGGCAGTGACACAAAGCCAAGGGTCTAAAGTCTTACATAAGACTATGACAGCCGGTTGCCACA      |
| Anaerostipes sp.<br>3_2_56FAA cont2.102                    | ACWB01000102.1 | 21593-21680   | TTACATATTCAGTAAAACTGTCAAAAGGCAGTGGCACAAAGCCAAGGGTCTAAGATCTGATTACAGATTATGACAGCCGGTTGCCGTA      |
| Anaerostipes sp.<br>3_2_56FAA cont2.103                    | ACWB01000103.1 | 8012-8104     | AAAATAAATAGGCAAAGCTGCCGAAAGGCAGTGACGCAAAGCTAAAGGGGCTATATCGTATAGGGAGTATGATCGTGCCAGCCAGCTGCCTCA |

|                                                                                          |                       |                 |                                                                                           |
|------------------------------------------------------------------------------------------|-----------------------|-----------------|-------------------------------------------------------------------------------------------|
| Anaerostipes<br>3_2_56FAA cont2.17                                                       | sp.<br>ACWB01000017.1 | 7965-7880       | TTACATATTGGGCAAAACAGGTGAAAGCCTGCGGCGCAAAGCTAAAGGGTCTAAGATTTATTGATTATGACAGCCAGCTGCAGTT     |
| Anaerostipes<br>3_2_56FAA cont2.30                                                       | sp.<br>ACWB01000030.1 | 779-865         | TTTAATATTTAGTAAACTATCGAAAGGTAGTGACACAAAGCCAAGGGTCTAAGATCTCTAAGAGATTACGATAGCCGGTTGCCGCA    |
| Anaerostipes<br>3_2_56FAA cont2.30                                                       | sp.<br>ACWB01000030.1 | 492-582         | ATTATTCATCGGTAAACTATTGAAAGATAGTGACACAAAGCCAAGGGTCTAAGGTCTCAGAACGGGGATTATGACAGCCGGTTGCCACA |
| Anaerostipes<br>3_2_56FAA cont2.65                                                       | sp.<br>ACWB01000065.1 | 60079-60163     | TTTATATTTTGGCAAAACCGGGGAAATCCGGTGACGCAAAGCCAAGGGCCTAAACCATTACTGGTACGGCAGCTGGTTGCTCCA      |
|                                                                                          |                       |                 |                                                                                           |
| Anopheles gambiae str.<br>PEST<br>CRA_x9P1GAV4UD8<br>probable bacterial<br>contamination | AAAB01002796.1        | 10989-10902     | GCATGATAAAGGCAAACTGAACTGAAAAGTCAGGACGCAAAGCCTCCGGTCTAATAGCAGGAATGCTAATGATAGCGGGTTACCAAG   |
| Anopheles gambiae str.<br>PEST whole genome<br>shotgun sequencing project                | AAAB01030370.1        | 270-355         | GTAGTCATTTGGCAAACTGGTTGAAAGGCCAGGACGCAAAGCCTCCGGTCTAAAGACATGTCGTCCAGGATAGCGGGTTGCCACA     |
| Anoxybacillus flavithermus<br>WK1                                                        | CP000922.1            | 1599568-1599486 | AAGAAGTAAAGGCACAGCTAAGGAACTTAGCGTCGCAAAGCTATAGGGGCTAACGGGATACCTATGCCAGCCAGCTGCCATT        |
| Anoxybacillus flavithermus<br>WK1                                                        | CP000922.1            | 368638-368724   | TTGAATAATCGGCAAACTACTCGAAAGGGTAGGGCGCAAAGCTATAGGGGCTACGTCTATTTGTAGATATGCCAGCCAGTTGCCCTT   |
|                                                                                          |                       |                 |                                                                                           |
| Atta colombica fungus<br>garden Bottom 2030640873                                        | AGFT01130798.1        | 435-350         | GTAGTCATTTGGCAAACTGGTTGAAAGGCCAGGACGCAAAGCCTCCGGTCTAAAGACATGATGTCCAGGATAGCGGGTTGCAACA     |
| Atta colombica fungus                                                                    | ADWX01004240.1        | 68-1            | TCCCGATAATGGCAAACCTGGGGTGACCCAGGGGCGCAAAGCTACGGAACCGTTAACACGGTTGGCCG                      |

|                                                |                |               |                                                                                         |
|------------------------------------------------|----------------|---------------|-----------------------------------------------------------------------------------------|
| garden FPBSU3X01A71RA                          |                |               |                                                                                         |
| Atta colombica fungus<br>garden Top 2030348470 | AGFS01046399.1 | 1-84          | GACCAGGGCAAACCTGTGCGAAAGCCAGGGACGCAAAGCCACCGATCTACAGCCCGGAAGGGCCATGACCGCGGGGTTGCCAAG    |
| Atta colombica fungus<br>garden Top 2030376834 | AGFS01071743.1 | 33-119        | ATTGAATATGGGCAAATTTATCGAAAGATAAAGACGCAAAGCTATGGGTCTACGGACAATCTTGTCTAAGATCGCCAAGCTGCCAAC |
| Atta colombica fungus<br>garden Top 2030402538 | AGFS01094788.1 | 253-339       | ATTGAATATGGGCAAATTTATCGAAAGATAAAGACGCAAAGCTATGGGTCTACGGACAATCTTGTCTAAGATCGCCAAGCTGCCAAC |
| Atta colombica fungus<br>garden Top 2030455872 | AGFS01142509.1 | 19-105        | TGTGCAAAAAGGCAAACCGGATGAAAGTCCGGGACGCAAAGCCTCCGGTCTAAGGGTCAGAGTACCTAGGATAGCGGGGCCACCACA |
| Azoarcus aromaticum EbN1<br>complete genome    | CR555306.1     | 718866-718950 | CTCTGAAAAAGGCAAACCCGTCGAAAGGCGGGGACGCAAAATCACCGGTCTACAGGGGTCGCCCCATGACAGCGGGATTGCCAGG   |
|                                                |                |               |                                                                                         |
| Bacillus licheniformis lam<br>and lchAA1 genes | X94148.1       | 1848-1934     | AGCAGATAAAGGCAAACCTGCGGAAACGCAGGGACGCAAAGCCATGGCCTAAGGTACTGACGGTGCTACGGTTGACAGGTTGCCGAA |
| Bacillus licheniformis<br>lchAA gene           | Y10550.1       | 784-870       | AGCAGATAAAGGCAAACCTGCGGAAACGCAGGGACGCAAAGCCATGGCCTAAGGTACTGACGGTGCTACGGTTGACAGGTTGCCGAA |
| Bacillus anthracis A2012<br>main chromosome    | AAAC01000001.1 | 914180-914264 | CAGCGAGAAAGGCAAACCTGATGGAACATTAGGACGCAAACTACAGGAGCTAAGGCCGAAAGGCTACGCTAGCCAGTTACCGGA    |
| Bacillus anthracis str. A0174<br>BAO.Contig121 | ABLT01000026.1 | 56017-55933   | CAGCGAGAAAGGCAAACCTGATGGAACATTAGGACGCAAACTACAGGAGCTAAGGCCGAAAGGCTACGCTAGCCAGTTACCGGA    |
| Bacillus anthracis str. A0193<br>BAQ.Contig113 | ABKF01000028.1 | 10930-11014   | CAGCGAGAAAGGCAAACCTGATGGAACATTAGGACGCAAACTACAGGAGCTAAGGCCGAAAGGCTACGCTAGCCAGTTACCGGA    |
| Bacillus anthracis str. A0248                  | CP001598.1     | 397192-397276 | CAGCGAGAAAGGCAAACCTGATGGAACATTAGGACGCAAACTACAGGAGCTAAGGCCGAAAGGCTACGCTAGCCAGTTACCGGA    |
| Bacillus anthracis str. A0389<br>BAK.Contig141 | ABLB01000011.1 | 135158-135074 | CAGCGAGAAAGGCAAACCTGATGGAACATTAGGACGCAAACTACAGGAGCTAAGGCCGAAAGGCTACGCTAGCCAGTTACCGGA    |

|                                                                      |                |               |                                                                                       |
|----------------------------------------------------------------------|----------------|---------------|---------------------------------------------------------------------------------------|
| Bacillus anthracis str. A0442<br>BAH.Contig161                       | ABKG01000009.1 | 135148-135064 | CAGCGAGAAAGGCAAACCTGATGGAAACATTAGGACGCAAACTACAGGAGCTAAGGCCGAAAGGCTACGCTAGCCAGTTACCGGA |
| Bacillus anthracis str. A0465<br>BAM.Contig83                        | ABLH01000025.1 | 55413-55329   | CAGCGAGAAAGGCAAACCTGATGGAAACATTAGGACGCAAACTACAGGAGCTAAGGCCGAAAGGCTACGCTAGCCAGTTACCGGA |
| Bacillus anthracis str. A0488<br>BAC.Contig147                       | ABJC01000008.1 | 11320-11404   | CAGCGAGAAAGGCAAACCTGATGGAAACATTAGGACGCAAACTACAGGAGCTAAGGCCGAAAGGCTACGCTAGCCAGTTACCGGA |
| Bacillus anthracis str. A1055<br>cont245                             | AAEO01000030.1 | 151854-151938 | CAGCGAGAAAGGCAAACCTGATGGAAACATTAGGACGCAAACTACAGGAGCTAAGGCCGAAAGGCTACGCTAGCCAGTTACCGGA |
| Bacillus anthracis str. Ames                                         | AE016879.1     | 397292-397376 | CAGCGAGAAAGGCAAACCTGATGGAAACATTAGGACGCAAACTACAGGAGCTAAGGCCGAAAGGCTACGCTAGCCAGTTACCGGA |
| Bacillus anthracis str. 'Ames<br>Ancestor'                           | AE017334.2     | 397292-397376 | CAGCGAGAAAGGCAAACCTGATGGAAACATTAGGACGCAAACTACAGGAGCTAAGGCCGAAAGGCTACGCTAGCCAGTTACCGGA |
| Bacillus anthracis str.<br>Australia 94 cont54                       | AAES01000043.1 | 103414-103498 | CAGCGAGAAAGGCAAACCTGATGGAAACATTAGGACGCAAACTACAGGAGCTAAGGCCGAAAGGCTACGCTAGCCAGTTACCGGA |
| Bacillus anthracis str. CDC<br>684                                   | CP001215.1     | 397645-397729 | CAGCGAGAAAGGCAAACCTGATGGAAACATTAGGACGCAAACTACAGGAGCTAAGGCCGAAAGGCTACGCTAGCCAGTTACCGGA |
| Bacillus anthracis str.<br>CNEVA-9066 cont2232                       | AAEN01000023.1 | 138415-138499 | CAGCGAGAAAGGCAAACCTGATGGAAACATTAGGACGCAAACTACAGGAGCTAAGGCCGAAAGGCTACGCTAGCCAGTTACCGGA |
| Bacillus anthracis str.<br>Kruger B cont1014                         | AAEQ01000043.1 | 90673-90589   | CAGCGAGAAAGGCAAACCTGATGGAAACATTAGGACGCAAACTACAGGAGCTAAGGCCGAAAGGCTACGCTAGCCAGTTACCGGA |
| Bacillus anthracis str. Sterne                                       | AE017225.1     | 397305-397389 | CAGCGAGAAAGGCAAACCTGATGGAAACATTAGGACGCAAACTACAGGAGCTAAGGCCGAAAGGCTACGCTAGCCAGTTACCGGA |
| Bacillus anthracis str.<br>Vollum cont55                             | AAEP01000046.1 | 103744-103828 | CAGCGAGAAAGGCAAACCTGATGGAAACATTAGGACGCAAACTACAGGAGCTAAGGCCGAAAGGCTACGCTAGCCAGTTACCGGA |
| Bacillus anthracis str.<br>Western North America<br>USA6153 cont1978 | AAER01000042.1 | 136402-136318 | CAGCGAGAAAGGCAAACCTGATGGAAACATTAGGACGCAAACTACAGGAGCTAAGGCCGAAAGGCTACGCTAGCCAGTTACCGGA |

|                                                               |                |                 |                                                                                                |
|---------------------------------------------------------------|----------------|-----------------|------------------------------------------------------------------------------------------------|
| Bacillus anthracis<br>Tsiankovskii-I<br>gcontig_1106600029418 | ABDN02000009.1 | 88712-88628     | CAGCGAGAAAGGCAAACCTGATGGAACATTAGGACGCAAACTACAGGAGCTAAGGCCGAAAGGCTACGCTAGCCAGTTACCGGA           |
| Bacillus cellulosilyticus<br>DSM 2522                         | CP002394.1     | 4574691-4574612 | TTAATATTGGGGCAAACCTGTGCGAAAGTGCAGGACGCAAAGCCACGGGTCTAAGCATAGTATGATAGCCGGTTACCTAG               |
| Bacillus cellulosilyticus<br>DSM 2522                         | CP002394.1     | 2534514-2534426 | TTTGTATAAAGGCAAACCTATTTCGAAAGGATAGGACGCAAAAGTCATGGGTCTAAAGCTAACGCATTGCAAAGACCGCCAGACTACCAAG    |
| Bacillus cellulosilyticus<br>DSM 2522                         | CP002394.1     | 2551967-2551883 | ATTGTATAAAGGCAAACCTATTGAAAGATAAGGACGCAAAAGCCAAGGGCTAAATTATTTTATAATATGGCAGCCGGTTGCACAA          |
| Bacillus cellulosilyticus<br>DSM 2522                         | CP002394.1     | 2575578-2575493 | AATACGAAACGGCAAAACCATCGAAAGTTGGTGACGCAAAAGCTATAGGGGCTTCCTTCATCTAGAAGAAGCCAGCCAGTTACCGAA        |
| Bacillus cellulosilyticus<br>DSM 2522                         | CP002394.1     | 854055-854147   | ACCAGATAAAGGCAAATCTATTGAAAAGTAGAGGCGCAAACTACGGATCTAAGGGCTAAATGTTTAATGTCTATGATAGCCGGTTACCTAG    |
| Bacillus cellulosilyticus<br>DSM 2522                         | CP002394.1     | 4239850-4239934 | GTACGATAATAGCAAAGCTATCTGAAAAGTAGTGACGCAAACTAAAGGGGCTAAAACGTTGAGTCATGCCAGCCAGTTGCCGAA           |
| Bacillus cereus 03BB102                                       | CP001407.1     | 416694-416778   | CAGCGAGAAAGGCAAACCTGATGGAACATTAGGACGCAAACTACAGGAGCTAAGGCCGAAAGGCTACGCTAGCCAGTTACCGGA           |
| Bacillus cereus 03BB108<br>gcontig_1112316047305              | ABDM02000004.1 | 164457-164549   | AGATATTTTGTAGCACACTATTCGAAAGGATAGGCCGCAAAGCTTAGAGTCTACGGTAATACATATTGGTTACTAAGATCGTCTGGTTGCACAT |
| Bacillus cereus 03BB108<br>gcontig_1112316047309              | ABDM02000008.1 | 106856-106940   | CAGCGAGAAAGGCAAACCTGATGGAACATTAGGACGCAAACTACAGGAGCTAAGGCCGAAAGGCTACGCTAGCCAGTTACCGGA           |
| Bacillus cereus 172560W<br>contig00006                        | ACLV01000030.1 | 63719-63811     | AGATATTTTGTAGCACACTATTCGAAAGGATAGGCCGCAAAGCTTAGAGTCTACGGTAATACATATTGGTTACTAAGATCGTCTGGTTGCACAT |
| Bacillus cereus 172560W<br>contig00919                        | ACLV01000013.1 | 36856-36940     | CAGCGAGAAAGGCAAACCTGATGGAACATGAGGACGCAAACTACAGGAGCTAAGGTCGAAAGGCTACGCTAGCCAGTTACCGGA           |
| Bacillus cereus 95/8201                                       | ACMF01000010.1 | 108220-108304   | CAGCGAGAAAGGCAAACCTGATGGAACATTAGGACGCAAACTACAGGAGCTAAGGCCGAAAGGCTACGCTAGCCAGTTACCGGA           |

|                                                 |                |               |                                                                                               |
|-------------------------------------------------|----------------|---------------|-----------------------------------------------------------------------------------------------|
| contig00017                                     |                |               |                                                                                               |
| Bacillus cereus AH1134<br>gcontig_1113129653792 | ABDA02000001.1 | 755065-755157 | AGATATTTTATGCACACTATTCGAAAGGATAGGCCGCAAAGCTTAGAGTCTACGGTAATACATATTGGTTACTAAGATCGTCTGGTTGCACAT |
| Bacillus cereus AH1134<br>gcontig_1113129653792 | ABDA02000001.1 | 113216-113300 | CAGCGAGAAAGGCAAACCTGATGGAACATGAGGACGCAAACTACAGGAGCTAAGGTCGAAAGGCTACGCTAGCCAGTTACCGGA          |
| Bacillus cereus AH1271<br>contig00439           | ACMR01000019.1 | 23756-23840   | CAGCGAGAAAGGCAAACCTGATGGAACATTAGGACGCAAACTACAGGAGCTAAGGCCGAAAGGCTATGCTAGCCAGTTACCGGA          |
| Bacillus cereus AH1272<br>contig00103           | ACMS01000342.1 | 4951-4859     | ACATATTTTATGCACACTATTCGAAAGGATAGGCCGCAAAGCTTAGAGTCTACGGTAATATATATTGGTTACTAAGATCGTCTGGTTGCACTT |
| Bacillus cereus AH1272<br>contig00637           | ACMS01000029.1 | 25218-25302   | CAGCGAGAAAGGCAAACCTGATGGAACATGAGGACGCAAACTACAGGGGCTAAGGTCAAACGACTATGCTAGCCAGTTACCGGA          |
| Bacillus cereus AH1273<br>contig00080           | ACMT01000028.1 | 6612-6696     | CAGCGAGAAAGGCAAACCTGATGGAACATGAGGACGCAAACTACAGGGGCTAAGGTCAAACGACTATGCTAGCCAGTTACCGGA          |
| Bacillus cereus AH1273<br>contig00259           | ACMT01000293.1 | 5594-5686     | ACATATTTTATGCACACTATTCGAAAGGATAGGCCGCAAAGCTTAGAGTCTACGGTAATATATATTGGTTACTAAGATCGTCTGGTTGCACTT |
| Bacillus cereus AH187                           | CP001177.1     | 464065-464149 | CAGCGAGAAAGGCAAACCTGGTGGAAACATTAGGACGCAAACTACAGGAGCTAAGGCCGAAAGGCTACGCTAGCCAGTTACCGGA         |
| Bacillus cereus AH603<br>contig00051            | ACMP01000014.1 | 1595-1679     | CAGCGAGAAAGGCAAACCTTATGGAACATGAGGACGCAAACTACAGGAGCTAAGGTCGAAAGGCTATGCTAGCCAGTTACCGGA          |
| Bacillus cereus AH603<br>contig00195            | ACMP01000037.1 | 9234-9324     | AAATATTTTATGCACACTATTCGAAAGGATAGGCCGCAAAGCTTAGAGTCTACGGTAATATATTGGTTACTAAGATCGTCTGGTTGCACAT   |
| Bacillus cereus AH621<br>contig00346            | ACLX01000013.1 | 1595-1679     | CAGCGAGAAAGGCAAACCTTATGGAACATGAGGACGCAAACTACAGGGGCTAAGGTCGAAAGGCTAAGCTAGCCAGTTACCGGA          |
| Bacillus cereus AH676<br>contig00042            | ACMQ01000015.1 | 52028-52112   | CAGCGAGAAAGGCAAACCTGATGGAACATGAGGACGCAAACTACAGGAGCTAAGGTCGAAAGGCTACGCTAGCCAGTTACCGGA          |
| Bacillus cereus AH676                           | ACMQ01000033.1 | 20960-21052   | AGATATTTTATGCACACTATTCGAAAGGATAGGCCGCAAAGCTTAGAGTCTACGGTAATACATATTGGTTACTAAGATCGTCTGGTTGCACAT |



|                                           |                |                 |                                                                                               |
|-------------------------------------------|----------------|-----------------|-----------------------------------------------------------------------------------------------|
| contig00295                               |                |                 |                                                                                               |
| Bacillus cereus AH820                     | CP001283.1     | 413589-413673   | CAGCGAGAAAGGCAAACCTGATGGAACATTAGGACGCAAACTACAGGAGCTAAGGCCGAAAGGCTACGCTAGCCAGTTACCGGA          |
| Bacillus cereus ATCC 10876<br>contig00505 | ACL01000013.1  | 109234-109318   | CAGCGAGAAAGGCAAACCTGATGGAACATGAGGACGCAAACTACAGGAGCTAAGGTCGAAAGGCTACGCTAGCCAGTTACCGGA          |
| Bacillus cereus ATCC 10876<br>contig00511 | ACL01000029.1  | 9709-9801       | AGATATTTTGTAGCACACTATTCGAAAGGATAGGCCGCAAGCTTAGAGTCTACGGTAATACATATTGGTTACTAAGATCGTCTGGTTGCACAT |
| Bacillus cereus ATCC 10987                | AE017194.1     | 504284-504368   | CAGCGAGAAAGGCAAACCTGGTGGAAACATTAGGACGCAAACTACAGGAGCTAAGGCCGAAAGGCTACGCTAGCCAGTTACCGGA         |
| Bacillus cereus ATCC 14579                | AE016877.1     | 408156-408240   | CAGCGAGAAAGGCAAACCTGATGGAACATGAGGACGCAAACTACAGGAGCTAAGGTCGAAAGGCTACGCTAGCCAGTTACCGGA          |
| Bacillus cereus ATCC 14579                | AE016877.1     | 1036786-1036878 | AGATATTTTGTAGCACACTATTCGAAAGGATAGGCCGCAAGCTTAGAGTCTACGGTAATACATATTGGTTACTAAGATCGTCTGGTTGCACAT |
| Bacillus cereus ATCC 4342<br>contig00056  | ACL01000008.1  | 110907-110991   | CAGCGAGAAAGGCAAACCTGATGGAACATTAGGACGCAAACTACAGGAGCTAAGGCCGAGAGGCTACGCTAGCCAGTTACCGGA          |
| Bacillus cereus ATCC 4342<br>contig00081  | ACL01000070.1  | 14309-14221     | ACCTATATTTGGCACACTATTCGAAAGAATAGGTCGCAAGCTAAGAGTCTAAAGTAATGAAAATTACTATGATAGTCTGGTTGCAGTT      |
| Bacillus cereus ATCC 4342<br>contig00081  | ACL01000070.1  | 14149-14061     | AAAATAATGGGCACACTATTCGAAAGGATAGGTCGCAAGCTAAGAGTCTAAGGTAATGAAAATTACTATGATAGTCTGGTTGCAGTT       |
| Bacillus cereus B4264                     | CP001176.1     | 1063140-1063232 | AGATATTTTGTAGCACACTATTCGAAAGGATAGGCCGCAAGCTTAGAGTCTACGGTAATACATATTGGTTACTAAGATCGTCTGGTTGCACAT |
| Bacillus cereus B4264                     | CP001176.1     | 426372-426456   | CAGCGAGAAAGGCAAACCTGATGGAACATGAGGACGCAAACTACAGGAGCTAAGGTCGAAAGGCTACGCTAGCCAGTTACCGGA          |
| Bacillus cereus B4264                     | CP001176.1     | 4733162-4733074 | ACCTATATTTGGCACACTATTCGAAAGGATAGGTCGCAAGCTAAGAGTCTAAAGTAATGAAAATTACTATGATAGTCTGGTTGCAGTT      |
| Bacillus cereus B4264                     | CP001176.1     | 4733001-4732913 | AAAATAATGGGCATACTATTCGAAAGGATAGGTCGCAAGCTAAGAGTCTAAGGTAATGAAAATTACTATGATAGTCTGGTTGCAGTT       |
| Bacillus cereus BDRD-Cer4<br>contig00006  | ACME01000010.1 | 50668-50752     | CAGCGAGAAAGGCAAACCTGATGGAACATGAGGACGCAAACTACAGGAGCTAAGGTCGAAAGGCTACGCTAGCCAGTTACCGGA          |
| Bacillus cereus BDRD-Cer4<br>contig00050  | ACME01000020.1 | 53577-53669     | AGATATTTTGTAGCACACTATTCGAAAGGATAGGCCGCAAGCTTAGAGTCTACGGTAATACATATTGGTTACTAAGATCGTCTGGTTGCACAT |
| Bacillus cereus<br>BDRD-ST196 contig00873 | ACMD01000018.1 | 1598-1682       | CAGCGAGAAAGGCAAACCTGATGGAACATGAGGGCGCAAACTACAGGGGCTAAGGTCAAATGACTATGCTAGCCAGTTACCGGA          |

|                                             |                |               |                                                                                                |
|---------------------------------------------|----------------|---------------|------------------------------------------------------------------------------------------------|
| Bacillus cereus<br>BDRD-ST196 contig01724   | ACMD01000050.1 | 57330-57422   | ACATATTTTGTAGCACACTATTCGAAAGGATAGGCCGCAAAGCTTAGAGTCTACGGTAATATATATTGGTTACTAAGATCGTCTGGTTGCACTT |
| Bacillus cereus BDRD-ST24<br>contig00576    | ACMB01000013.1 | 50679-50763   | CAGCGAGAAAGGCAAACCTGATGGAACATGAGGACGCAAACTACAGGAGCTAAGGTCGAAAGGCTACGCTAGCCAGTTACCGGA           |
| Bacillus cereus BDRD-ST24<br>contig00793    | ACMB01000024.1 | 28379-28471   | AGATATTTTGTAGCACACTATTCGAAAGGATAGGCCGCAAAGCTTAGAGTCTACGGTAATACATATTGGTTACTAAGATCGTCTGGTTGCACAT |
| Bacillus cereus BDRD-ST26<br>contig00010    | ACMC01000013.1 | 34673-34757   | CAGCGAGAAAGGCAAACCTGGTGGAAACATTAGGACGCAAACTACAGGAGCTAAGGCCGAAAGGCTACGCTAGCCAGTTACCGGA          |
| Bacillus cereus BGSC 6E1<br>contig00601     | ACLU01000027.1 | 39308-39400   | AGATATTTTGTAGCACACTATTCGAAAGGATAGGCCGCAAAGCTTAGAGTCTACGGTAATACATATTGGTTACTAAGATCGTCTGGTTGCACAT |
| Bacillus cereus BGSC 6E1<br>contig00754     | ACLU01000015.1 | 50013-50097   | CAGCGAGAAAGGCAAACCTGATGGAACATTAGGACGCAAACTACAGGAGCTAAGGCCGAAAGGCTACGCTAGCCAGTTACCGGA           |
| Bacillus cereus biovar<br>anthracis str. CI | CP001746.1     | 393798-393882 | CAGCGAGAAAGGCAAACCTGATGGAACATTAGGACGCAAACTACAGGAGCTAAGGCCGAAAGGCTACGCTAGCCAGTTACCGGA           |
| Bacillus cereus E33L                        | CP000001.1     | 414665-414749 | CAGCGAGAAAGGCAAACCTGATGGAACATTAGGACGCAAACTACAGGAGCTAAGGCCGAAAGGCTACGCTAGCCAGTTACCGGA           |
| Bacillus cereus F65185<br>contig00099       | ACMO01000012.1 | 50786-50870   | CAGCGAGAAAGGCAAACCTGATGGAACATGAGGACGCAAACTACAGGAGCTAAGGTCGAAAGGCTACGCTAGCCAGTTACCGGA           |
| Bacillus cereus F65185<br>contig00531       | ACMO01000021.1 | 60370-60462   | AGATATTTTGTAGCACACTATTCGAAAGGATAGGCCGCAAAGCTTAGAGTCTACGGTAATACATATTGGTTACTAAGATCGTCTGGTTGCACAT |
| Bacillus cereus G9241<br>cont1845           | AAEK01000003.1 | 195343-195254 | AAATGTAATTGGCACACTATTCGAAAGGATAGGTCGCAAAGCTTAAGAGTCTAAGGTAATACATATTACTATGATAGTCTGGTTGCAGTT     |
| Bacillus cereus G9241<br>cont1845           | AAEK01000003.1 | 195166-195078 | GAAATAAATCGGCACACTATTCGAAAGGATAGGTCGCAAAGCTAAGAGTCTAAGGTAATACATATTACTATGATAGTCTGGTTGCAATT      |
| Bacillus cereus G9241<br>cont1847           | AAEK01000015.1 | 90981-90897   | CAGCGAGAAAGGCAAACCTGATGGAACATTAGGACGCAAACTACAGGAGCTAAGGCCGAGAGGCTACGCTAGCCAGTTACCGGA           |

|                                                    |                |                 |                                                                                               |
|----------------------------------------------------|----------------|-----------------|-----------------------------------------------------------------------------------------------|
| Bacillus cereus G9842                              | CP001186.1     | 4695548-4695460 | AAAATAAATGGGCACACTGTTTCGAAAGAATAGGTCGCAAAGCTAAGAGTCTAAGGTAATAAAAATTACTATGATAGTCTGGTTGCAGTT    |
| Bacillus cereus G9842                              | CP001186.1     | 4695705-4695617 | TCCTATATTTGGCACACTATTCGAAAGGATAGGTCGCAAAGCTAAGAGTCTAAAGTAATGAAAATTACTATGATAGTCTGGTTGCAGTT     |
| Bacillus cereus G9842                              | CP001186.1     | 404495-404579   | CAGCGAGAAAGGCAAACCTGATGGAACATGAGGACGCAAACTACAGGAGCTAAGGTCGAAAGGCTATGCTAGCCAGTTACCGGA          |
| Bacillus cereus G9842                              | CP001186.1     | 4695392-4695304 | AAAATAAATAGGCACACTGTTTCGAAAGGATAGGTCGCAAAGCTAAGAGTCTAAGGTAATGAAAATTACTATGATAGTCTGGTTGCAGTT    |
| Bacillus cereus G9842                              | CP001186.1     | 1039145-1039237 | AGATATTTTTAGCACACTATTCGAAAGGATAGGCCGCAAAGCTTAGAGTCTACGGTAATACATATTGGTTACTAAGATCGTCTGGTTGCACAT |
| Bacillus cereus H3081.97<br>gcontig2_1113133506686 | ABDL02000002.1 | 149771-149855   | CAGCGAGAAAGGCAAACCTGGTGGAACATTAGGACGCAAACTACAGGAGCTAAGGCCGAAAGGCTACGCTAGCCAGTTACCGGA          |
| Bacillus cereus m1293<br>contig01009               | ACLS01000016.1 | 3286-3370       | CAGCGAGAAAGGCAAACCTGATGGAACATTAGGACGCAAACTACAGGAGCTAAGGCCGAAAGGCTACGCTAGCCAGTTACCGGA          |
| Bacillus cereus m1550<br>contig00016               | ACMA01000078.1 | 13598-13510     | AAAATGAATGGGCACACTATTTGAAAGAATAGGTCGCAAAGCTAAGAGTCTAAGGTAATGAAAATTACTATGATAGTCTGGTTGCAGTT     |
| Bacillus cereus m1550<br>contig00016               | ACMA01000078.1 | 13758-13670     | ACCTATATTTGGCACACTATTCGAAAGGATAGGTCGCAAAGCTAAGAGTCTAAAGTAATGAAAATTACTATGATAGTCTGGTTGCAGTT     |
| Bacillus cereus m1550<br>contig00043               | ACMA01000009.1 | 110109-110193   | CAGCGAGAAAGGCAAACCTGATGGAACATGAGGACGCAAACTACAGGAGCTAAGGTCGAAAGGCTACGCTAGCCAGTTACCGGA          |
| Bacillus cereus m1550<br>contig01013               | ACMA01000023.1 | 24906-24998     | AGATATTTTTAGCACACTATTCGAAAGGATAGGCCGCAAAGCTTAGAGTCTACGGTAATACATATTGGTTACTAAGATCGTCTGGTTGCACAT |
| Bacillus cereus MM3<br>contig00449                 | ACLW01000034.1 | 58482-58574     | AAATATTTTTAGCACACTATTCGAAAGGATAGGCCGCAAAGCTTAGAGTCTACGGTAATACATATTGGTTACTAAGATCGTCTGGTTGCACAT |
| Bacillus cereus MM3<br>contig00530                 | ACLW01000014.1 | 4424-4508       | CAGCGAGAAAGGCAAACCTGATGGAACATTAGGACGCAAACTACAGGAGCTAAGGTCGAAAGGCTATGCTAGCCAGTTACCGGA          |
| Bacillus cereus NC7401<br>genomic DNA              | AP007209.1     | 463937-464021   | CAGCGAGAAAGGCAAACCTGGTGGAACATTAGGACGCAAACTACAGGAGCTAAGGCCGAAAGGCTACGCTAGCCAGTTACCGGA          |
| Bacillus cereus<br>NVH0597-99                      | ABDK02000010.1 | 105183-105267   | CAGCGAGAAAGGCAAACCTGATGGAACATTAGGACGCAAACTACAGGAGCTAAGGCCGAAAGGCTACGCTAGCCAGTTACCGGA          |

|                                         |                |               |                                                                                               |
|-----------------------------------------|----------------|---------------|-----------------------------------------------------------------------------------------------|
| gcontig2_1106432853405                  |                |               |                                                                                               |
| Bacillus cereus Q1                      | CP000227.1     | 463082-463166 | CAGCGAGAAAGGCAAACCTGGTGGAAACATTAGGACGCAAACTACAGGAGCTAAGGCCGAAAGGCTACGCTAGCCAGTTACCGGA         |
| Bacillus cereus R309803<br>contig01121  | ACLY01000011.1 | 19476-19567   | GGAATATCTTGGCACACTATTTGAAAGAATAGGTCGCAAAGCTTTGAGTCTAAGGTAATGAATCTTATTACTAGGATTGTCTGAGTTGCAAAT |
| Bacillus cereus R309803<br>contig01156  | ACLY01000012.1 | 2396-2480     | CAGCGAGAAAGGCAAACCTGATGGAAACATGAGGACGCAAACTACAGGGGCTAAGGTCGAAAGGCTATGCTAGCCAGTTACCGGA         |
| Bacillus cereus Rock1-15<br>contig00008 | ACMH01000027.1 | 48366-48458   | AGATATTTTTAGCACACTATTCGAAAGGATAGGCCGCAAAGCTTAGAGTCTACGGTAATACATATTGGTTACTAAGATCGTCTGGTTGCACAT |
| Bacillus cereus Rock1-15<br>contig00038 | ACMH01000013.1 | 50646-50730   | CAGCGAGAAAGGCAAACCTGATGGAAACATGAGGACGCAAACTACAGGAGCTAAGGTCGAAAGGCTACGCTAGCCAGTTACCGGA         |
| Bacillus cereus Rock1-3<br>contig00001  | ACMG01000012.1 | 114164-114248 | CAGCGAGAAAGGCAAACCTGATGGAAACATGAGGGCGCAAACTATAGGGGCTAAGGTCGAAAGGCTATGCTAGCCAGTTACCGGA         |
| Bacillus cereus Rock3-28<br>contig02794 | ACMI01000055.1 | 114100-114184 | CAGCGAGAAAGGCAAACCTGATGGAAACATGAGGGCGCAAACTATAGGGGCTAAGGTCGAGAGGCTATGCTAGCCAGTTACCGGA         |
| Bacillus cereus Rock3-29<br>contig00189 | ACMJ01000013.1 | 114104-114188 | CAGCGAGAAAGGCAAACCTGATGGAAACATGAGGGCGCAAACTATAGGGGCTAAGGTCGAGAGGCTATGCTAGCCAGTTACCGGA         |
| Bacillus cereus Rock3-42<br>contig00267 | ACMK01000017.1 | 3213-3297     | CAGCGAGAAAGGCAAACCTGATGGAAACATTAGGACGCAAACTACAGGAGCTAAGGCCGAAAGGCTACGCTAGCCAGTTACCGGA         |
| Bacillus cereus Rock4-18<br>contig00127 | ACMN01000011.1 | 114220-114304 | CAGCGAGAAAGGCAAACCTGATGGAAACATGAGGGCGCAAACTAAAGGGGCTAAGGTCGAAAGGCTATGCTAGCCAGTTACCGGA         |
| Bacillus cereus Rock4-2<br>contig00206  | ACMM01000123.1 | 86586-86678   | AGATATTTTTAGCACACTATTCGAAAGGATAGGCCGCAAAGCTTAGAGTCTACGGTAATACATATTGGTTACTAAGATCGTCTGGTTGCACAT |
| Bacillus cereus Rock4-2<br>contig00352  | ACMM01000057.1 | 109136-109220 | CAGCGAGAAAGGCAAACCTGATGGAAACATGAGGACGCAAACTACAGGAGCTAAGGTCGAAAGGCTACGCTAGCCAGTTACCGGA         |
| Bacillus cereus SJ1                     | ADFM01000080.1 | 102098-102182 | CAGCGAGAAAGGCAAACCTGATGGAAACATTAGGACGCAAACTACAGGAGCTAAGGCCGAAAGGCTACGCTAGCCAGTTACCGGA         |

|                                                 |                |                 |                                                                                                 |
|-------------------------------------------------|----------------|-----------------|-------------------------------------------------------------------------------------------------|
| Bacillus cereus SJ1                             | ADFM01000046.1 | 265043-264951   | AGATATTTTGTAGCACACTATTGCGAAAGGATAGGCCGCAAAGCTTAGAGTCTACGGTAATACATATTGGTTACTAAGATCGTCTGGTTGCACAT |
| Bacillus cereus subsp. cytotoxis NVH 391-98     | CP000764.1     | 420958-421045   | GGGCGAGAAAGGCAAACCTCGTGGAACATAAGGCTGCAAACTGTAGGGCTTAAGGTCAAGAGAAGGCGAAGCTAGTCAGTTACCGAA         |
| Bacillus cereus W gcontig_1112319163066         | ABCZ02000007.1 | 116274-116358   | CAGCGAGAAAGGCAAACCTGATGGAACATTAGGACGCAAACTACAGGAGCTAAGGCCGAAAGGCTACGCTAGCCAGTTACCGGA            |
| Bacillus coagulans 2-6                          | CP002472.1     | 265102-265187   | ATATCAAAGGGGCAAATCCATTGAAAAATGGAGACGCAAACTACAGGGGCTACCGGTTTTCCAATCATGCCAGCCAGTTGTTAAC           |
| Bacillus coagulans 2-6                          | CP002472.1     | 2451009-2450925 | AATTGAAAAAGGCAAATTCATCGAAAGGTGAAGACGCAAAAGCTAAAGGGACTAAAGTCAGACGACCATGTCTAGCCAGTTACCGAT         |
| Bacillus coagulans 36D1                         | CP003056.1     | 2189771-2189855 | AATTGAAAAAGGCAAATTCATCGAAAGGTGGAGACGCAAAAGCTAAAGGGACTAAAGTCAGATGACCATGTCTAGCCAGTTACCGAT         |
| Bacillus coagulans 36D1                         | CP003056.1     | 1076897-1076812 | ATATCAAAGGGGCAAATCCATTGAAAAATGGAGACGCAAACTACAGGGGCTACCGGTTTTCTAACCATGCCAGCCAGTTGCTAAC           |
| Bacillus coagulans XZL4 contig000210            | AFWM01000210.1 | 19858-19770     | ATATCAAAGGGGCAAATCCATTGAAAAATGGAGACGCAAACTACAGGGGCTTAAACAGTTTTTAATAACTTATAAAAAGTTATTAAA         |
| Bacillus coahuilensis m4-4 1955101000018        | ABFU01000018.1 | 9013-8932       | AATATATAAGGGCAATCCAATTGATATATTGGTATGCAAAGCTATAGGGGCTTACTCATAGATCTGCCAGACAGCTGCAATT              |
| Bacillus coahuilensis m4-4 1955101000045        | ABFU01000045.1 | 13915-13831     | TTTTATATTCGGCAAACCTACTTGAAAGGGTAGGACGCAAACTAAAGGGGCTAAATCATTCGTGACATGCCAGCCAGTTGCAGTC           |
| Bacillus coahuilensis m4-4 1955101000063        | ABFU01000063.1 | 11732-11649     | TCATATAAGGGCAAATATTGAAAAAATATGACGCAAAAGCTACAGGGGCTTATGCTTACAGCAATGCTAGCCAGCTGCCGAA              |
| Bacillus coahuilensis m4-4 1955101000064        | ABFU01000064.1 | 66880-66963     | AATTAGAAAGGGCAAACCTATTGAAAAATGAGGACGCAAAAGTCACAGGTCTAAGGCATGTAGCTAGGATGGCTGGTCTGCCTCT           |
| Bacillus halodurans C-125 DNA                   | BA000004.3     | 597582-597667   | CCTTGAAAAAGGCGAGTGTTTGAAATGGAAAGACGCAAAAGCTGCGAGTCTGAAATCCTTCTGAATAGGGATAGTCGAGTTGTCAA          |
| Bacillus licheniformis ATCC 14580               | CP000002.3     | 378607-378693   | AGCAGATAAAGGCAAACCTGCGGAAACGCAGGGACGCAAAAGCCATGGCCTAAGGTGCTGACGGTGCTACGGTTGACAGGTTGCCGAA        |
| Bacillus licheniformis BNP29 DNA for lichenysin | AJ005061.1     | 4393-4479       | AGCAGATAAAGGCAAACCTGCGGAAACGCAGGGACGCAAAAGCCATGGCCTAAGGTACTGACGGTGCTACGGTTGACAGGTTGCCGAA        |

|                                                                                       |                |                 |                                                                                                |
|---------------------------------------------------------------------------------------|----------------|-----------------|------------------------------------------------------------------------------------------------|
| A synthetase operon                                                                   |                |                 |                                                                                                |
| Bacillus licheniformis DSM 13                                                         | AE017333.1     | 378413-378499   | AGCAGATAAAGGCAAACCTGCGGAAACGCAGGGACGCAAAGCCATGGCCTAAGGTGCTGACGGTGCTACGGTTGACAGGTTGCCGAA        |
| Bacillus licheniformis lichenysin biosynthesis operon: lichenysin synthetase A (licA) | U95370.1       | 192-278         | AGCAGATAAAGGCAAACCTGCGGAAACGCAGGGACGCAAAGCCATGGCCTAAGGTACTGACGGTGCTACGGTTGACAGGTTGCCGAA        |
| Bacillus megaterium DSM319                                                            | CP001982.1     | 1084610-1084518 | TTCAGAGAAAAGGCAAAACTATTGAAAAGTAGTGACGCAAAGCCTCAGGTCTAAGGTTGTTTTCTCGATATACTATGACGGCTGGGCTCCCTGG |
| Bacillus megaterium QM B1551                                                          | CP001983.1     | 1077098-1077012 | TCCAGATAAGGGCAAAACTATTGAAAATAGTGACGCAAAGCTTCAGGTCTAAGGCCATTTTTGGCTACGACAGCTGGGTTCCCTGG         |
| Bacillus megaterium WSH-002                                                           | CP003017.1     | 3889773-3889857 | TACAGACAAGGGCAAACCAAGTTGAAAGGCTGGGACGCAAAACCTCGGGTCTAAGGTCACAGGACTAGGACGGCCGGGTTTCCTGA         |
| Bacillus megaterium WSH-002                                                           | CP003017.1     | 3878564-3878656 | TTCAGATAAAGGCAAAGCTGCTGAAAAGCAGTGACGCAAAGCTTCAGGTCTAAGGTAATGTTTACAACATGCTAAGATGGCTGGGTTCCCTGA  |
| Bacillus megaterium WSH-002                                                           | CP003017.1     | 3829336-3829420 | TACAGAAAAAGGCAAACTAATTGAAAAGTTAGGACGCAAACTACAGATCTACGGTTTTTACACTATGATGGCTGAGTTTCCTTT           |
| Bacillus mycoides DSM 2048 contig00022                                                | ACMU01000010.1 | 105768-105852   | CAGCGAGAAAAGGCAAACTGATGGAAACATGAGGGCGCAAACTACAGGGGCTAAGGTCAAATGACTATGCTAGCCAGTTACCGGA          |
| Bacillus pumilus ATCC 7061 BAT.Contig112                                              | ABRX01000003.1 | 451234-451142   | AGAAGAAAAAGGCAAATCTATGGAAACGTAGAGACGCAAAGCCATGTCCTAAGGTAAATGTTGCTTTTTTACTAAGGTCGCCAGGTTACCGAA  |
| Bacillus pumilus S-1 contig000007                                                     | AGBY01000007.1 | 15738-15830     | AGAAGAAAAAGGCAAATCTATGGAAACATAGAGACGCAAAGCCATGTCCTAAGGTAAAAGTTGCTTTTTTACTATGGTCGCCAGGTTACCGAA  |
| Bacillus pumilus SAFR-032                                                             | CP000813.1     | 318462-318554   | AGAAGAAAAAGGCAAATCTATGGAAACGTAGAGACGCAAAGCCATGTCCTAAGGTAAATGTTGCTTTTTTACTATGGTCGCCAGGTTACCGAA  |
| Bacillus selenitireducens                                                             | CP001791.1     | 807943-808025   | TGGATAGATGGGCAAACCTGTTGAAAAGCAGGGACGCAAAGCCAAGGGTCTTCATCATGATGATATGACAGCCGGTTGCACCG            |

|                                           |                |                 |                                                                                                                        |
|-------------------------------------------|----------------|-----------------|------------------------------------------------------------------------------------------------------------------------|
| MLS10                                     |                |                 |                                                                                                                        |
| Bacillus selenitireducens<br>MLS10        | CP001791.1     | 2058946-2059028 | AATTAGAAAAGGCAAAATCTGTGAAATCAGATGACGCAAAGCCACGGACCTAACGGTTTTCCACGGTCGCCGGGCTACCAAA                                     |
| Bacillus sp. 2_A_57_CT2<br>cont1.20       | ACWD01000020.1 | 177205-177119   | TCTAATCCAGGGCAAATTTTACGAAAGTAAAAGACGCAAAGCTGCGGGCCTAAAGCAGGTTTCTGCCATGGCAGCCGGGCTGCACAG                                |
| Bacillus sp. 2_A_57_CT2<br>cont1.21       | ACWD01000021.1 | 129677-129594   | CTGGATAATCGGCAAACCTTATTGAAAAGTAAGGACGCAAAGCCACGAGTCTAAGGTCATAGACTATGATAGTCGGGTTGCAGGT                                  |
| Bacillus sp. 2_A_57_CT2<br>cont1.4        | ACWD01000004.1 | 23734-23821     | ATTTCTCTGGGCAAATTTTACGAAAGTAAAAGACGCAAAGCCACGGGCCTAAACAGCTTAATTGTCATGGCAGCCGGGTTGCACAA                                 |
| Bacillus sp. 2_A_57_CT2<br>cont1.60       | ACWD01000060.1 | 8590-8502       | CGCAGAAAAAGGCAAACCTCATTGAAAGATGAGGACGCAAAGTCACGGGTCTAAGGTATTGGATGATACTACGATGGCTGGGTTGCCTGG                             |
| Bacillus sp. 2_A_57_CT2<br>cont1.78       | ACWD01000078.1 | 42006-41920     | AAATTGAAAAGGCAAACCTTATCGAAAGGTAAGGACGCAAAGCTACGAGTCTAAAATCCTCCAGGGAATGACAGTCGGGTTGCCAAG                                |
| Bacillus sp. B14905<br>1101159007448      | AAXV01000001.1 | 231054-230969   | GGGAAAGATAGGCAAATTTACTAAAAAGTAAAGATGCAAAGCTACAGGTCTAAGGGAATAAGTACTTAGATGGCTAGGTTGCAAAA                                 |
| Bacillus sp. BT1B_CT2<br>cont1.25         | ACWC01000025.1 | 9229-9143       | AGCAGATAAAGGCAAACCTGCGGAAACGCAGGGACGCAAAGCCATGGCCTAAGGTGCTGACGGTGCTACGGTTGACAGTTGCCGAA                                 |
| Bacillus sp. m3-13 Contig69               | ACPC01000050.1 | 24677-24772     | CATGGAAAAAGGCAAACTAGTGAAAGCTAGTGACGCAAACTAAAGGGACTTAAGTTTGCTTTCAATCGAGCAGACCAGTTAGCCAGTTACCCGC                         |
| Bacillus sp. m3-13 Contig74               | ACPC01000020.1 | 181031-181143   | AACAGTCAAAGGCAAACCTTGCTGAAAGGCAAGGACGCAAAGTCAACAGATCTAAGATTATGTAAAAGAGATATAAAAAGTTCTTTTACCAATTAAGATG<br>GCTGGGCTGCCTGA |
| Bacillus sp. NRRL B-14911<br>109999053105 | AAOX01000001.1 | 401431-401517   | TTCTGTGAAACGCAAACCTTATTGAAAGATAAGGGCGCAAAGCCTCAGGTCTAAGGCCATGTATGGTTAAGACGGCTGGGCTGCCGCA                               |
| Bacillus sp. NRRL B-14911<br>109999053105 | AAOX01000001.1 | 400824-400906   | TATTGAAAAGGCAAACCTTATTGAAAATAAGGACGCAAAGCCGCGAGTCTAAGGCGTAAGCTATGATAGTCGGGCTGCCAGG                                     |
| Bacillus sp. NRRL B-14911                 | AAOX01000001.1 | 434573-434658   | AAATACCAAAGGCAAAATCAITGAAAAATGATGACGCAAAGCTAAAGGGGCCTCTATTACGTCGATAAGGCCAGCCAGCTGCCATC                                 |

|                                            |                |               |                                                                                                                 |
|--------------------------------------------|----------------|---------------|-----------------------------------------------------------------------------------------------------------------|
| 1099999053105                              |                |               |                                                                                                                 |
| Bacillus sp. NRRL B-14911<br>1099999053105 | AAOX01000001.1 | 422555-422642 | GAATATCAAGGGCAAATCACTGAAAAGTGATGACGCAAAGCTATAGGGGCTTATGTGGAACAAAAACAATGCCAGCCAGCTGCCATC                         |
| Bacillus sp. NRRL B-14911<br>1099999053126 | AAOX01000007.1 | 21294-21207   | TCTTACTAAGGGCAAATTTTACGAAAGTAAAAGACGCAAAGCCACGGGCCTAAAACAAGTTATTTGTCATGGCAGCCGGGCGCCAAG                         |
| Bacillus sp. NRRL B-14911<br>1099999053130 | AAOX01000005.1 | 65987-65903   | TAAATATACAGGCAAATTCATCGAAAGGTGAAGACGCAAACTATAGGGGCTAAAGCCAAAAGGCTATGCTGCGCAGTTACCGAT                            |
| Bacillus sp. NRRL B-14911<br>1099999053130 | AAOX01000005.1 | 210212-210294 | CTATATAAGTGGCAAATTTTATGAAAGTAAAAGACGCAAAGCTGCGGGCCTAAGGCTTTTGCTATGGCAGCCGGGCTGCTTGC                             |
| Bacillus sp. NRRL B-14911<br>1099999053130 | AAOX01000005.1 | 221613-221507 | AGCAGAAAAAGGCAAACCTGTTGAAAGATAGGGACGCAAAGTCACAGGTCTACCGCGCCTATTGAGAGTAAAGTCGGATGAGGCGCCAGGACGGCTG<br>GATTGCCTGG |
| Bacillus sp. NRRL B-14911<br>1099999053131 | AAOX01000025.1 | 55956-55872   | TACTGATAAAGGCAAACCTGTCGAAAGGCAGGGACGCAAAGCTATGGGCCTTCCCGCATCAGCGGTTGGCTGCCAGGCTGCCGGG                           |
| Bacillus sp. SG-1<br>1101501000684         | ABCF01000033.1 | 2268-2362     | TGTTATAGAAGGCAAACCTCATCTGAAAAGGGAGGACGCAAAGCCACGGGCCTACATGCAAAATATTATTGTTATATTGGCAGCCGGGTTACCTGT                |
| Bacillus sp. SG-1<br>1101501000763         | ABCF01000037.1 | 19041-19129   | GCGACGAAAAGGTAACTTATCGAAAGGTGAGGGCACAAAGCCGCGGGTCTAAGGTGACAGTAGTCACTATGACAGCCGGGTTGCCGAA                        |
| Bacillus sp. SG-1<br>1101501000765         | ABCF01000117.1 | 1845-1935     | GTCAGACAAAAGGCAAACCTCATTGAAAGATGGGGACGCAAAGTCACAGGTCTAAGGCAAGAGAAAACTTGTAGGATGGCTGGGCTGCCTGA                    |
| Bacillus sp. SG-1<br>1101501000788         | ABCF01000005.1 | 53556-53644   | AGTAAATAAAGGCAACCTCTTCCGAAAGGAATTGGACGCAAAGCTAAAGGGGCTAACGTACATAAATACAATGCCAGCCAGTTGCAGAA                       |
| Bacillus sp. SG-1<br>1101501000788         | ABCF01000005.1 | 23265-23355   | TTAACGAAAAGGCAAACCTTGCTGAAAGGCAAGGACGCAAAACCACAGATCTAAAGATTGCTAGAGCAATCCAAGATGGCTGGGTTACCGAA                    |
| Bacillus sp. SG-1<br>1101501000798         | ABCF01000023.1 | 20598-20690   | TATAAGAAAAGGCAAACCTTGGCGAAAGCAAAGGACGCAAAGTCACAGACCTTCAATTTTTCATGTGAAAAATTATGGTGGCTGGATTACCGGA                  |



|                                               |                |                 |                                                                                               |
|-----------------------------------------------|----------------|-----------------|-----------------------------------------------------------------------------------------------|
| Bacillus sp. SG-1<br>1101501000813            | ABCF01000011.1 | 47422-47506     | CGTACGAAAGGGCAAAATCATTGAAAAGTGACGACGCAAACTATAGGGGCTAAAATCAACAGATGATGCCAGCCAGTTACCGAA          |
| Bacillus sp. SG-1<br>1101501000813            | ABCF01000011.1 | 46728-46643     | ATTTCGAGAAAGGCAAAGTCATTGAAAGATGGCGGCGCAAACTATAGGGGCTACAGTCTGATCGACGATGCCAGCCAGTTGCCGAA        |
| Bacillus sp. SG-1<br>1101501000813            | ABCF01000011.1 | 25253-25167     | TTTAAATATTGGCAAATCAGTCGAAAGGCTGGGACGCAAACTACAGGGGCTACCATCCAATAAGGATATGCCAGCCAGTTGCACAC        |
| Bacillus thuringiensis<br>BMB171              | CP001903.1     | 428508-428592   | CAGCGAGAAAGGCAAACCTGATGGAACATGAGGACGCAAACTACAGGAGCTAAGGTCGAAAGGCTACGCTAGCCAGTTACCGGA          |
| Bacillus thuringiensis<br>BMB171              | CP001903.1     | 1051549-1051641 | AGATATTTTTCAGCACACTATTCGAAAGGATAGGCCGCAAGCTTAGAGTCTACGGTAATACATATTGGTTACTAAGATCGTCTGGTTGCACAT |
| Bacillus thuringiensis Bt407<br>contig00013   | ACMZ01000107.1 | 13539-13451     | AAAATAAATGGGCACACTGTTTCGAAAGGATAGGTCGCAAGCTAAGAGTCTAAGGTAATGAAAATTACTATGATAGTCTGGTTGCAGTT     |
| Bacillus thuringiensis Bt407<br>contig00013   | ACMZ01000107.1 | 13699-13611     | AAAATAAATGGGCACACTATTCGAAAGGATAGGTCGCAAGCTAAGAGTCTAAGGTAATGAAAATTACTATGATAGTCTGGTTGCAGTT      |
| Bacillus thuringiensis Bt407<br>contig00013   | ACMZ01000107.1 | 13859-13771     | ACCTATTTTTCAGCACACTATTCGAAAGGATAGGTCGCAAGCTAAGAGTCTAAAGTAATGAAAATTACTATGATAGTCTGGTTGCAGTT     |
| Bacillus thuringiensis Bt407<br>contig00021   | ACMZ01000030.1 | 51741-51833     | AGATATTTTTCAGCACACTATTCGAAAGGATAGGCCGCAAGCTTAGAGTCTACGGTAATACATATTGGTTACTAAGATCGTCTGGTTGCACAT |
| Bacillus thuringiensis Bt407<br>contig00126   | ACMZ01000014.1 | 26338-26422     | CAGCGAGAAAGGCAAACCTGATGGAACATGAGGACGCAAACTACAGGAGCTAAGGTCGAAAGGCTACGCTAGCCAGTTACCGGA          |
| Bacillus thuringiensis IBL<br>200 contig00157 | ACNK01000011.1 | 128852-128936   | CAGCGAGAAAGGCAAACCTGATGGAACATGAGGACGCAAACTACAGGAGCTAAGGTCGAAAGGCTATGCTAGCCAGTTACCGGA          |
| Bacillus thuringiensis IBL<br>200 contig00164 | ACNK01000028.1 | 28071-28163     | AGATATTTTTCAGCACACTATTCGAAAGGATAGGCCGCAAGCTTAGAGTCTACGGTAATACATATTGGTTACTAAGATCGTCTGGTTGCACAT |
| Bacillus thuringiensis IBL                    | ACNK01000085.1 | 43451-43363     | ACCTATTTTTCAGCACACTATTCGAAAGGATAGGTCGCAAGCTAAGAGTCTAAAGTAATGAAAATTACTATGATAGTCTGGTTGCAGTT     |

|                                                                           |                |               |                                                                                                 |
|---------------------------------------------------------------------------|----------------|---------------|-------------------------------------------------------------------------------------------------|
| 200 contig00491                                                           |                |               |                                                                                                 |
| Bacillus thuringiensis IBL<br>200 contig00491                             | ACNK01000085.1 | 43291-43203   | AAAATAAATGGGCACACTATTTCGAAAGGATAGGTCGCAAAGCTAAGAGTCTAAAGTAATGAAAATTACTATGATAGTCTGGTTGCAGTT      |
| Bacillus thuringiensis IBL<br>200 contig00491                             | ACNK01000085.1 | 43135-43047   | AAAATAAATGGGCACACTGTTTCGAAAGGATAGGTCGCAAAGCTAAGAGTCTAAGGTAATGAAAATTACTATGATAGTCTGGTTGCAGTT      |
| Bacillus thuringiensis IBL<br>4222 contig00054                            | ACNL01000037.1 | 24785-24877   | AGATATTTTGTAGCACACTATTTCGAAAGGATAGGCCGCAAAGCTTAGAGTCTACGGTAATACATATTGGTTACTAAGATCGTCTGGTTGCACAT |
| Bacillus thuringiensis IBL<br>4222 contig00080                            | ACNL01000013.1 | 45063-45147   | CAGCGAGAAAGGCAAACCTGATGGAACATGAGGACGCAAACTACAGGAGCTAAGGTCGAAAGGCTATGCTAGCCAGTTACCGGA            |
| Bacillus thuringiensis<br>serovar andalousiensis<br>BGSC 4AW1 contig00024 | ACNG01000016.1 | 100871-100955 | CAGCGAGAAAGGCAAACCTGATGGAACATTAGGTCGCAAACTACAGGAGCTAAGGCCGAAAGGCTACGCTAGCCAGTTACCGGA            |
| Bacillus thuringiensis<br>serovar berliner ATCC<br>10792 contig00063      | ACNF01000103.1 | 13929-13841   | ACCTATTTTGGGCACACTATTTCGAAAGGATAGGTCGCAAAGCTAAGAGTCTAAAGTAATGAAAATTACTATGATAGTCTGGTTGCAGTT      |
| Bacillus thuringiensis<br>serovar berliner ATCC<br>10792 contig00063      | ACNF01000103.1 | 13609-13521   | AAAATAAATGGGCACACTGTTTCGAAAGGATAGGTCGCAAAGCTAAGAGTCTAAGGTAATGAAAATTACTATGATAGTCTGGTTGCAGTT      |
| Bacillus thuringiensis<br>serovar berliner ATCC<br>10792 contig00063      | ACNF01000103.1 | 13769-13681   | AAAATAAATGGGCACACTATTTCGAAAGGATAGGTCGCAAAGCTAAGAGTCTAAGGTAATGAAAATTACTATGATAGTCTGGTTGCAGTT      |
| Bacillus thuringiensis<br>serovar berliner ATCC<br>10792 contig00099      | ACNF01000012.1 | 50751-50835   | CAGCGAGAAAGGCAAACCTGATGGAACATGAGGACGCAAACTACAGGAGCTAAGGTCGAAAGGCTACGCTAGCCAGTTACCGGA            |
| Bacillus thuringiensis                                                    | ACNF01000032.1 | 51741-51833   | AGATATTTTGTAGCACACTATTTCGAAAGGATAGGCCGCAAAGCTTAGAGTCTACGGTAATACATATTGGTTACTAAGATCGTCTGGTTGCACAT |

|                                                                          |                |                 |                                                                                               |
|--------------------------------------------------------------------------|----------------|-----------------|-----------------------------------------------------------------------------------------------|
| serovar berliner ATCC<br>10792 contig00251                               |                |                 |                                                                                               |
| Bacillus thuringiensis<br>serovar chinensis CT-43                        | CP001907.1     | 4753189-4753101 | ACCTATTTTTGGCACACTATTCGAAAGGATAGGTCGCAAAGCTAAGAGTCTAAAGTAATGAAAATTACTATGATAGTCTGGTTGCAGTT     |
| Bacillus thuringiensis<br>serovar chinensis CT-43                        | CP001907.1     | 1087308-1087400 | AGATATTTTTAGCACACTATTCGAAAGGATAGGCCGCAAAGCTTAGAGTCTACGGTAATACATATTGGTTACTAAGATCGTCTGGTTGCACAT |
| Bacillus thuringiensis<br>serovar chinensis CT-43                        | CP001907.1     | 421335-421419   | CAGCGAGAAAGGCAAACCTGATGGAACATGAGGACGCAAACTACAGGAGCTAAGGTCGAAAGGCTACGCTAGCCAGTTACCGGA          |
| Bacillus thuringiensis<br>serovar chinensis CT-43                        | CP001907.1     | 4753029-4752941 | AAAATAAATGGGCACACTATTCGAAAGGATAGGTCGCAAAGCTAAGAGTCTAAGGTAATGAAAATTACTATGATAGTCTGGTTGCAGTT     |
| Bacillus thuringiensis<br>serovar finitimus YBT-020                      | CP002508.1     | 508029-508113   | CAGCGAGAAAGGCAAACCTGGTGGAACATTAGGACGCAAACTACAGGAGCTAAGGCCGAAAGGCTACGCTAGCCAGTTACCGGA          |
| Bacillus thuringiensis<br>serovar huazhongensis<br>BGSC 4BD1 contig00178 | ACN101000012.1 | 108772-108856   | CAGCGAGAAAGGCAAACCTGATGGAACATGAGGACGCAAACTACAGGAGCTAAGGTCGAAAGGCTATGCTAGCCAGTTACCGGA          |
| Bacillus thuringiensis<br>serovar huazhongensis<br>BGSC 4BD1 contig00561 | ACN101000026.1 | 25055-25147     | AGATATTTTTAGCACACTATTCGAAAGGATAGGCCGCAAAGCTTAGAGTCTACGGTAATACATATTGGTTACTAAGATCGTCTGGTTGCACAT |
| Bacillus thuringiensis<br>serovar israelensis ATCC<br>35646 sq1869       | AAJM01000107.1 | 5811-5723       | AAAATAAATGGGCACACTGTTTCGAAAGAATAGGTCGCAAAGCTAAGAGTCTAAGGTAATGAAAATTACTATGATAGTCTGGTTGCGGTT    |
| Bacillus thuringiensis<br>serovar israelensis ATCC<br>35646 sq1869       | AAJM01000107.1 | 5655-5567       | AAAATAAATAGGCACACTGTTTCGAAAGGATAGGTCGCAAAGCTAAGAGTCTAAGGTAATGAAAATTACTATGATAGTCTGGTTGCAGTT    |
| Bacillus thuringiensis                                                   | AAJM01000107.1 | 5968-5880       | TCCTATATTGGCACACTATTCGAAAGGATAGGTCGCAAAGCTAAGAGTCTAAAGTAATGAAAATTACTATGATAGTCTGGTTGCAGTT      |

|                                                                        |                |               |                                                                                               |
|------------------------------------------------------------------------|----------------|---------------|-----------------------------------------------------------------------------------------------|
| serovar israelensis ATCC<br>35646 sq1869                               |                |               |                                                                                               |
| Bacillus thuringiensis<br>serovar israelensis ATCC<br>35646 sq1918     | AAJM01000023.1 | 10970-11054   | CAGCGAGAAAGGCAAACCTGATGGAAACATGAGGACGCAAACTACAGGAGCTAAGGTCGAAAGGCTATGCTAGCCAGTTACCGGA         |
| Bacillus thuringiensis<br>serovar israelensis ATCC<br>35646 sq1919     | AAJM01000012.1 | 18087-17995   | AGATATTTTGTAGCACACTATTCGAAAGGATAGGCCGCAAGCTTAGAGTCTACGGTAATACATATTGGTTACTAAGATCGTCTGGTTGCACAT |
| Bacillus thuringiensis<br>serovar konkukian str. 97-27                 | AE017355.1     | 421273-421357 | CAGCGAGAAAGGCAAACCTGATGGAAACATTAGGACGCAAACTACAGGAGCTAAGGCCGAAAGGCTACGCTAGCCAGTTACCGGA         |
| Bacillus thuringiensis<br>serovar kurstaki str.<br>T03a001 contig00605 | ACND01000297.1 | 5539-5631     | AGATATTTTGTAGCACACTATTCGAAAGGATAGGCCGCAAGCTTAGAGTCTACGGTAATACATATTGGTTACTAAGATCGTCTGGTTGCACAT |
| Bacillus thuringiensis<br>serovar kurstaki str.<br>T03a001 contig01181 | ACND01000016.1 | 13856-13940   | CAGCGAGAAAGGCAAACCTGATGGAAACATGAGGACGCAAACTACAGGAGCTAAGGTCGAAAGGCTACGCTAGCCAGTTACCGGA         |
| Bacillus thuringiensis<br>serovar monterrey BGSC<br>4AJ1 contig00061   | ACNE01000010.1 | 108344-108428 | CAGCGAGAAAGGCAAACCTGATGGAAACATTAGGACGCAAACTACAGGAGCTAAGGCCGAAAGGCTATGCTAGCCAGTTACCGGA         |
| Bacillus thuringiensis<br>serovar pakistani str. T13001<br>contig00777 | ACNC01000167.1 | 6779-6691     | ACCTATATTTGGCACACTATTCGAAAGGATAGGTCGCAAGCTAAGAGTCTAAAGTAATGAAAATTACTATGATAGTCTGGTTGCAGTT      |
| Bacillus thuringiensis<br>serovar pakistani str. T13001<br>contig00777 | ACNC01000167.1 | 6460-6372     | AAAATAAATGGGCACACTATTCGAAAGAATAGGTCGCAAGCTAAGAGTCTAAGGTAATGAAAGTTACTATGATAGTCTGGTTGCAGTT      |

|                                                                            |                |               |                                                                                               |
|----------------------------------------------------------------------------|----------------|---------------|-----------------------------------------------------------------------------------------------|
| Bacillus thuringiensis<br>serovar pakistani str. T13001<br>contig00777     | ACNC01000167.1 | 6619-6531     | AAAATAAATGGGCACACTATTTCGAAAGGATAGGTCGCAAAGCTAAGAGTCTAAAGTAATGAAAATTACTATGATAGTCTGGTTGCAGTT    |
| Bacillus thuringiensis<br>serovar pakistani str. T13001<br>contig01104     | ACNC01000014.1 | 63876-63960   | CAGCGAGAAAGGCAAACCTGATGGAACATGAGGACGCAAACTACAGGAGCTAAGGTCGAAAGGCTACGCTAGCCAGTTACCGGA          |
| Bacillus thuringiensis<br>serovar pakistani str. T13001<br>contig01136     | ACNC01000043.1 | 25666-25758   | AGATATTTTAGCACACTATTTCGAAAGGATAGGCCGCAAAGCTTAGAGTCTACGGTAATACATATTGGTTACTAAGATCGTCTGGTTGCACAT |
| Bacillus thuringiensis<br>serovar pondicheriensis<br>BGSC 4BA1 contig00141 | ACNH01000011.1 | 108303-108387 | CAGCGAGAAAGGCAAACCTGATGGAACATTAGGACGCAAACTACAGGAGCTAAGGCCGAAAGGCTACGCTAGCCAGTTACCGGA          |
| Bacillus thuringiensis<br>serovar pulsiensis BGSC<br>4CC1 contig00348      | ACNJ01000012.1 | 117676-117760 | CAGCGAGAAAGGCAAACCTGATGGAACATTAGGACGCAAACTACAGGAGCTAAGGCCGAAAGGCTACGCTAGCCAGTTACCGGA          |
| Bacillus thuringiensis<br>serovar sotto str. T04001<br>contig01666         | ACNB01000274.1 | 3611-3519     | AGATATTTTAGCACACTATTTCGAAAGGATAGGCCGCAAAGCTTAGAGTCTACGGTAATACATATTGGTTACTAAGATCGTCTGGTTGCACAT |
| Bacillus thuringiensis<br>serovar sotto str. T04001<br>contig01710         | ACNB01000015.1 | 22111-22195   | CAGCGAGAAAGGCAAACCTGATGGAACATGAGGACGCAAACTACAGGAGCTAAGGTCGAAAGGCTATGCTAGCCAGTTACCGGA          |
| Bacillus thuringiensis<br>serovar sotto str. T04001<br>contig01921         | ACNB01000155.1 | 152-64        | TCCTATATTGGCACACTATTTCGAAAGGATAGGTCGCAAAGCTAAGAGTCTAAAGTAATGAAAATTACTATGATAGTCTGGTTGCAGTT     |
| Bacillus thuringiensis                                                     | ACNA01000030.1 | 51739-51831   | AGATATTTTAGCACACTATTTCGAAAGGATAGGCCGCAAAGCTTAGAGTCTACGGTAATACATATTGGTTACTAAGATCGTCTGGTTGCACAT |

|                                                                            |                |                 |                                                                                                |
|----------------------------------------------------------------------------|----------------|-----------------|------------------------------------------------------------------------------------------------|
| serovar thuringiensis str.<br>T01001 contig00036                           |                |                 |                                                                                                |
| Bacillus thuringiensis<br>serovar thuringiensis str.<br>T01001 contig00037 | ACNA01000101.1 | 13594-13506     | AAAATAAATGGGCACACTGTTTCGAAAGGATAGGTCGCAAAGCTAAGAGTCTAAGGTAATGAAAATTACTATGATAGTCTGGTTGCAGTT     |
| Bacillus thuringiensis<br>serovar thuringiensis str.<br>T01001 contig00037 | ACNA01000101.1 | 13914-13826     | ACCTATTTTTGGGCACACTATTCGAAAGGATAGGTCGCAAAGCTAAGAGTCTAAAGTAATGAAAATTACTATGATAGTCTGGTTGCAGTT     |
| Bacillus thuringiensis<br>serovar thuringiensis str.<br>T01001 contig00037 | ACNA01000101.1 | 13754-13666     | AAAATAAATGGGCACACTATTCGAAAGGATAGGTCGCAAAGCTAAGAGTCTAAGGTAATGAAAATTACTATGATAGTCTGGTTGCAGTT      |
| Bacillus thuringiensis<br>serovar thuringiensis str.<br>T01001 contig00064 | ACNA01000012.1 | 26351-26435     | CAGCGAGAAAGGCAAACCTGATGGAACATGAGGACGCAAACTACAGGAGCTAAGGTCGAAAGGCTACGCTAGCCAGTTACCGGA           |
| Bacillus thuringiensis<br>serovar tochiensis BGSC<br>4Y1 contig00501       | ACMY01000012.1 | 29727-29811     | CAGCGAGAAAGGCAAACCTGATGGAACATTAGGACGCAAACTACAGGAGCTAAGGCCGAGAGGCTACGCTAGCCAGTTACCGGA           |
| Bacillus thuringiensis<br>serovar tochiensis BGSC<br>4Y1 contig00513       | ACMY01000115.1 | 8768-8680       | ACCTATATTTGGGCACACTATTCGAAAGGATAGGTCGCAAAGCTAAGAGTCTAAAGTAATGAAAATTACTATGATAGTCTGGTTGCAGTT     |
| Bacillus thuringiensis<br>serovar tochiensis BGSC<br>4Y1 contig00513       | ACMY01000115.1 | 8608-8520       | AAAATAAATGGGCACACTATTCGAAAGGATAGGTCGCAAAGCTAAGAGTCTAAGGTAATGAAAATTACTATGATAGTCTGGTTGCAGTT      |
| Bacillus thuringiensis str. Al<br>Hakam                                    | CP000485.1     | 1077635-1077727 | AGATATTTTTCAGCACACTATTCGAAAGGATAGGCCGCAAAGCTTAGAGTCTACGGTAATACATATTGGTTACTAAGATCGTCTGGTTGCACAT |

|                                                                   |                |                 |                                                                                                 |
|-------------------------------------------------------------------|----------------|-----------------|-------------------------------------------------------------------------------------------------|
| Bacillus thuringiensis str. Al<br>Hakam                           | CP000485.1     | 435376-435460   | CAGCGAGAAAAGGCCAAACTGATGGAAACATTAGGACGCAAAACTACAGGAGCTAAGGCCGAAAGGCTATGCTAGCCAGTTACCGGA         |
| Bacillus tusciae DSM 2912                                         | CP002017.1     | 2855432-2855346 | GTTGTATCAGGGCAAACCTAGCGGAAACGCTAGGACGCAAAGCCACGGGTCTAAGGGCACATGTGCCTATGATCGCCGGGTTGCCACT        |
| Bacillus weihenstephanensis<br>KBAB4                              | CP000903.1     | 416914-416998   | CAGCGAGAAAAGGCCAAACTTATGGAAACATGAGGACGCAAAACTACAGGAGCTAAGGTCGAAGGGCTAAGCTAGCCAGTTACCGGA         |
| Bacillus weihenstephanensis<br>KBAB4                              | CP000903.1     | 1053373-1053463 | AAATATTTTTAGCACACTATTGCGAAAGGATAGGCCGCAAAGCTTAGAGTCTACGGTAATATATTGGTTACTAAGATCGTCTGGTTGCACAT    |
|                                                                   |                |                 |                                                                                                 |
| Bacteroides capillosus<br>ATCC 29799<br>B_capillosus-2.0.1_Cont29 | AAXG02000004.1 | 120249-120340   | GCGCGACAAAGGCCAAACCGGCCGAAAGACCGGGACGCAAAGCCAGGAGGCTAAAGCGGACACAGTGTCCGCCATGCCGGTCCGGCCGCCGCA   |
| Bacteroides capillosus<br>ATCC 29799<br>B_capillosus-2.0.1_Cont30 | AAXG02000005.1 | 128432-128342   | ACCGACAAATGGCAAACCGGCTGAAAAACCGGGACGCAAAGCCAGGAGGCTAAAGCGGAGTCCGCTCCGCCACGCCCGTCCGGCCGCCGCA     |
| Bacteroides capillosus<br>ATCC 29799<br>B_capillosus-2.0.1_Cont30 | AAXG02000005.1 | 131709-131618   | GCGGGAAAAGGGCAAACCGGCTGAAAGGCCGGGACGCAAAGCCAGGAGGCTAAAGCGGAGGGAAACGCCGCCATGCCCGTCCGGTTGCCGCA    |
|                                                                   |                |                 |                                                                                                 |
| Bdellovibrio bacteriovorus<br>complete genome                     | BX842649.1     | 31567-31484     | TTTGCCTCAAGGCAAACCGTCGGAACGGCGGGACGCAAAGCTAAAGGGGTGTCGGTGC AAAGCCACGCCAGCCAGCTGCCAAA            |
|                                                                   |                |                 |                                                                                                 |
| Bioreactor metagenome<br>PBDCA2_contig03918                       | AGTN01366869.1 | 1264-1170       | ACTTAATATTAGCACACTCGTTGAAAAGCGGGGTCGTTAAACTATCAGGGTCTATAGGGCGCAAAATTTGTAGCCTATGACTGCCAGTTGGTAAT |
| Bioreactor metagenome<br>PBDCA2_contig06074                       | AGTN01645349.1 | 793-704         | TCATCGAAAAGGCCAAACCCGCCGAAAGGCGGGGACGCAAAGCCAACGATCTAAGGTGGCGTTGTTCCACTATGATGGCCGGGTTACCGAA     |

|                                                    |                |           |                                                                                                                   |
|----------------------------------------------------|----------------|-----------|-------------------------------------------------------------------------------------------------------------------|
| Bioreactor metagenome<br>PBDCA2_contig11110        | AGTN01458194.1 | 1542-1455 | GTGTGTCAAGGGCAAACCTGCCGAAAGGCAAGGACGCAAAGCTACAGGGTCTAAGATGCGAGTGCATTATGACAGCCTGGCCGCTGTA                          |
| Bioreactor metagenome<br>PBDCA2_contig11703        | AGTN01155880.1 | 544-476   | AATACTAAACCATTTCGTGAGAATGGGACGGAAAGCCTATGGGTCTCACGGAGACAGCCGGGTCGCCGAA                                            |
| Bioreactor metagenome<br>PBDCA2_contig12947        | AGTN01716158.1 | 156-64    | AAGCGCTAAGGGTAAACCTGCCGAAAGGCAAGGACGCAAAGCCATAGGGTCTAAGGCGCCGTAAAGCGGCACTATGACAGCCTGGCTGCCGCG                     |
| Bioreactor metagenome<br>PBDCA2_contig18731        | AGTN01465683.1 | 2016-1907 | CAGAGCAAACGGCAACCACGGCTGAAAAACGTGGGCGCAAAGCATGAAGTCTACGTACGCACGATTCCGATCAGGATCGAATGTCTGATATGATGGT<br>TCGGCTGCCTCC |
| Bioreactor metagenome<br>PBDCA2_contig19259        | AGTN01595931.1 | 1368-1281 | GGCTGTGAAAGGCAAACCCGCGCGAAAGCCGGGGACGCAAAGCATGAAGTCTAAAGCGTATTAGCGCCATGACGGTTCGGCCGCTCA                           |
| Bioreactor metagenome<br>PBDCA2_contig19259        | AGTN01595931.1 | 1544-1454 | TTCAGTGAAAGGCAAACCCGCGCGAAAGCCGGGGACGCAAAACACGAAGTCTAAAGCGCGTTGTTTGCGCCATGATGGTTCGGTCGCCTCA                       |
| Bioreactor metagenome<br>PBDCA2_contig24868        | AGTN01172759.1 | 75-164    | GTCATGATGGGGCAAACCTTATCCGAAAGGTAAGGGCGCAAAGCTATGGGTCTAAAGCGGGTTTTTCGCCTACGATTGCCAGGTTGCGGCT                       |
| Bioreactor metagenome<br>PBDCA2_contig30603        | AGTN01163285.1 | 112-196   | GGAGAACAAGGGCAAACCCAGTTAAAGACTGGGACGCAAAGTCAGGAATCTAAAGCGATGAGGCTATGATCGTCCGATCGCCGGA                             |
| Bioreactor metagenome<br>PBDCA2_contig37261        | AGTN01150342.1 | 175-87    | CCGACGGGCAGGCAAACCTCCGGGAAACCGGAGGACGCAAAGCTACGGGGCTAAAGACGGAGTACCGTCCATGCTCGCCGGGTACCGAA                         |
| Bioreactor metagenome<br>PBDCA2_contig44074        | AGTN01004618.1 | 518-434   | CAACTGACAAGGCAAACCTTATCGAAAGGTAGGGACGCAAAGCCACGTATCTAAAGCGTGAAAGCCAGGATGGTCGGGCTGCCAAA                            |
| Bioreactor metagenome<br>PBDCA2_FB2SNX102GIZ<br>S4 | AGTN01439841.1 | 179-262   | CGAGTAAAAGGGCAAACCTACCGAAAGGTGAGGACGCAAAGCGCGAAGTCTAAAGTTTTAACTATGACCGTTCGGCTGCCTCT                               |
| Bioreactor metagenome<br>PBDCA2_FB2SNX102H8I       | AGTN01649706.1 | 188-81    | TAGAATAAAGGGCAAACCCGGTAAAAGCCGGGGACGCAAAGCCGAGGATCTAAGGCCGTAGACGATTATTATCTAATAATAGCTATCTGGTCGGACTG<br>ATTGACCCA   |



|                                                    |                |         |                                                                                             |
|----------------------------------------------------|----------------|---------|---------------------------------------------------------------------------------------------|
| VK                                                 |                |         |                                                                                             |
| Bioreactor metagenome<br>PBDCA2_FB2SNX102HH1<br>FX | AGTN01535999.1 | 1-61    | AAAATGATGACGCAAAGCTAAAGGGGCTACGGCGATAACGCTATGCCAGCCAGTTGCATCA                               |
| Bioreactor metagenome<br>PBDCA2_FB2SNX102JH2<br>69 | AGTN01266532.1 | 1-72    | CTGTGCGAAAAGCAGGGACGCAAAGCCAGGCGTCAAAGGTGCTTAACGACGCTATGACAACCCGGTTACCGCG                   |
| Bioreactor metagenome<br>PBDCA2_FB2SNX102JP5<br>D2 | AGTN01203267.1 | 12-103  | ACACGATAAGGGCAAACTGTAAAAAGGCAGTGACGCAAAGCTATAGGGTCTAAAGTACTGCTCGAGGTACCATGACAGCCTGGTTACCGAA |
| Bioreactor metagenome<br>PBDCA2_FBNLWBQ01B1<br>WZJ | AGTN01513534.1 | 211-134 | AAACCCATCAAAAGATGGGGACGCAAAGCCATAGGGTCTAAGGTGCTTTACTGCGCTATGATTAGCCTGGCTGCCAAA              |
| Bioreactor metagenome<br>PBDCA2_FBNLWBQ01B9<br>FVX | AGTN01605802.1 | 262-173 | ACACGCTCTTAGCAAACCGGTTGAAAAGCCGGGACGCAAAGCCATAGGGTCTACGTTAAGTTCTACTTAATACGACAGCCGGTTGCCGTG  |
| Bioreactor metagenome<br>PBDCA2_FBNLWBQ01BU<br>FFA | AGTN01650811.1 | 204-130 | GAATGACGTTGGCAAACGCGCTGAAAAGCGTGGACGCAAAGCTTTGGAACCTGAAATGGTAGTCCGGCTGCATTG                 |
| Bioreactor metagenome<br>PBDCA2_FIDWTPW02P2<br>XTH | AGTN01471828.1 | 237-154 | AAGACGAAATGGCAAACCCGGTGAAAGCCGGTGACGCAAAGCTAAGAGGGGCTAAAACGAAAGTTATGCCAGCCAGCTGCCGAA        |
| Bioreactor metagenome<br>PBDCA2_FIDWTPW02P7F<br>K5 | AGTN01509622.1 | 79-1    | TTTTCGAAAAGGTAAATCCGGAAGAAATTCGGAGGCACAAAGCTGACGGACCCGTTATGGAAATAACAGGTAGCCGGG              |

|                                                    |                |         |                                                                                                         |
|----------------------------------------------------|----------------|---------|---------------------------------------------------------------------------------------------------------|
| Bioreactor metagenome<br>PBDCA2_FIDWTPW02PE<br>ZX4 | AGTN01549269.1 | 123-34  | TAAATGTTTGGCAAAGCTTCGAAAGGTAGTGACGCAAAGCTAGAGGGTCTAAGGGCGCTTAACCCGCCTATGACAGCCAGTTGCCCCG                |
| Bioreactor metagenome<br>PBDCA2_FIDWTPW02PT<br>MIS | AGTN01077586.1 | 119-217 | CTCCGATAATAGCAAACCCGGCGAAAGCCGGAGACGCAAAGCTGCGGGTCTAAAGCATACGCGTATCACGCGCTGTGCCACGACAGCCGGGCCGCCGA<br>A |
| Bioreactor metagenome<br>PBDCA2_FIDWTPW02PU<br>Z84 | AGTN01298486.1 | 87-173  | TTAAGCGTTAGGCAAACCTTATCGAAAGATAGGGGCGCAAAGCTATGGGTCTAAGAGCGTAACTGTTTATGACCGCCAGGCTGCGAAT                |
| Bioreactor metagenome<br>PBDCA2_FIDWTPW02PW<br>OH4 | AGTN01380621.1 | 239-151 | TTATAAAAGGGGCAAAACCGTCGAAAGACGGTGACGCAAACTATAGGGGCTAAAGCCTGGCAACAGGTTATGCCTGCCAGTTGCGCTG                |
| Bioreactor metagenome<br>PBDCA2_FIDWTPW02QJ<br>4U  | AGTN01152689.1 | 51-1    | CAACCGAAAAGGCAAACCTGTCTGAAAGGCAGGGACGCAAAGCTACAGGACC                                                    |
| Bioreactor metagenome<br>PBDCA2_FIDWTPW02Q1<br>E79 | AGTN01203929.1 | 411-336 | TCCTCGAAACGGCAAAACCGCCGTGAGGCGGTGACGCAAAGTTTCGGAGCCCCCTGTGGGCCGTCCGGGCTACCGAA                           |
| Bioreactor metagenome<br>PBDCA2_FIDWTPW02Q4<br>4V2 | AGTN01337245.1 | 374-430 | CGTGCGAAATGGCAAAGCTGGCGAAAGCCAGTGGCGCAAAGCTTCGAGACTACCACA                                               |
| Bioreactor metagenome<br>PBDCA2_FIDWTPW02Q5<br>D40 | AGTN01305277.1 | 169-246 | GTTTCGCAAAGGCAAACCTACCATCGAAACGAGTAGGACGCAAAGCCATGGGTCTAAAGCGGTATTGTTTCGGCTGCTAT                        |
| Bioreactor metagenome<br>PBDCA2_FIDWTPW02Q6<br>4W2 | AGTN01001772.1 | 4-93    | AGCTGTGAAAGGCAAAACCGTGCGAAAGCCGGGGACGCAAAGCACGAAGTCTAAAGCGCACATCAGCGCCATGACGGTTCAGCCGCCTCA              |

|                                                    |                |         |                                                                                                                             |
|----------------------------------------------------|----------------|---------|-----------------------------------------------------------------------------------------------------------------------------|
| PBDCA2_FIDWTPW02QK<br>5PK                          |                |         |                                                                                                                             |
| Bioreactor metagenome<br>PBDCA2_FIDWTPW02QK<br>GSS | AGTN01723490.1 | 55-1    | TAAAGCCAAGGGCAAACCCGGTGAAAACCGGCGGCGCAAAGCCACAGGGTCTACG                                                                     |
| Bioreactor metagenome<br>PBDCA2_FIDWTPW02QS<br>1R9 | AGTN01235706.1 | 282-196 | AATTGATAAAGGCAAATCCATCAAAAGATGGAGACGCAAAGCCGCAAGTCTAAAGCAAGTAATTGCCATGACGGTTGGGTGCGCGT                                      |
| Bioreactor metagenome<br>PBDCA2_FIDWTPW02R5<br>FZX | AGTN01049784.1 | 95-180  | CGTTGAAAAAGGCAAACCACCCGAAAGGGTGCGACGCAAAGCCACGGGCCTAAACAGCAAAGCTGTATGGCAGCCGGGCCGCAAT                                       |
| Bioreactor metagenome<br>PBDCA2_FIDWTPW02RB<br>M7S | AGTN01003536.1 | 379-461 | CCGTTGCAAGGGCAAAGCGGCCGAAAGGCAGCGACGCAAAGCCACGGGCCTACAGCGGGCAACCGCCAGGGCAGCCGGGCCGCG                                        |
| Bioreactor metagenome<br>PBDCA2_FIDWTPW02RB<br>PNY | AGTN01667892.1 | 190-106 | GATTGATAATAGCAAACCTACCGAAAGATAAGGACGCAAAGCCAAGGGTCTAAAGTCATTGTGACTATGACAGCCGGTTGCCAAA                                       |
| Bioreactor metagenome<br>PBDCA2_FIDWTPW02RD<br>FOO | AGTN01149177.1 | 333-256 | AAATTGGCAAACCTGTGCGAAAGACGGCGGTGACAAACCTGCGGGTCTAAGGCTTATGCTATGACAGCCAGTTGCAAAA                                             |
| Bioreactor metagenome<br>PBDCA2_FIDWTPW02RH<br>MLH | AGTN01354186.1 | 102-194 | TCGCGCCAAGGGCACACCGCGGAAAGCCGGGGGCCGCAAAGCCATGGGTCTACACGGGCCTGAGAGGGCCCGTACGACTGCCAGGTTGCCGTC                               |
| Bioreactor metagenome<br>PBDCA2_FIDWTPW02RL        | AGTN01527726.1 | 243-362 | CAGAGAACTGGCTACCATCGCCGAAAGGCAATGGGCGCAAAGCATGAAGTCTAAAGCTTGATATGCGTCTCAAAATGGCATTTTGGGACAGTAACGG<br>CTATGACGGTTCGGCTGCCTCA |

|                                                    |                |         |                                                                                                               |
|----------------------------------------------------|----------------|---------|---------------------------------------------------------------------------------------------------------------|
| FUX                                                |                |         |                                                                                                               |
| Bioreactor metagenome<br>PBDCA2_FIDWTPW02RQ<br>ICC | AGTN01268828.1 | 48-132  | AAACGACAATAGTAAACCTGCCGAAAGGCAGCGACACAAAGCTACAGGGCCTACAGGCGAAAGCCCATGGCAGCCAGTTGCCGAA                         |
| Bioreactor metagenome<br>PBDCA2_FIDWTPW02RU<br>IZD | AGTN01616185.1 | 50-135  | CAGTGATAAAGGCAAACCCCGCGAAAGCGGGCGACGCAAAGCTACAGGGCCTAAAGGGATATACCCGATGGCAGCCAGTTACCGAA                        |
| Bioreactor metagenome<br>PBDCA2_FIDWTPW02RY<br>B7J | AGTN01556829.1 | 74-159  | CCACGTTAATGGCTAAACCTGTGAAAACAGGCGGCGCAAAGCTAAAAGGGCCTAAAGGCGGAAGCCTATGGTAGCCAGCTGTCGGT                        |
| Bioreactor metagenome<br>PBDCA2_FIDWTPW02RZ<br>YK8 | AGTN01386429.1 | 375-480 | TTAGGGTTTTGGCAAACTTTTTGTAAAGAAAAGGACGCAAAGTGTGGAATCTAAAGTAATATAATTAGTAAAAGATTAGCTTACTATGATTGTCCTACT<br>GCATTA |
| Bioreactor metagenome<br>PBDCA2_FIDWTPW02S1<br>HW1 | AGTN01322048.1 | 380-296 | TAATAACTGGGGCAAACCTATCGAAAGGTAAGGACGCAAAGCTATGGGTCTACGGACAGCCGTCCATGATTGCCAGGCCGCCGAC                         |
| Bioreactor metagenome<br>PBDCA2_FIDWTPW02SC<br>X3J | AGTN01015665.1 | 80-163  | TTGAAGAAAAGGCAAACCTTACCGAAAGGTAAGGACGCAAAGCCACGGATCTGATACACTCTCCAAAGATAGCCGGGTGCCACG                          |
| Bioreactor metagenome<br>PBDCA2_FIDWTPW02SG<br>GE5 | AGTN01686469.1 | 273-171 | AAAGCAAGAGGGCAAACCCGCCGAAAGGCGGGGACGCAAAGCTCAGGAGCCTGACATTGAAAGCGAGTGACACCGTCTTCAATATGGCAGTCCGGC<br>CGCATTA   |
| Bioreactor metagenome<br>PBDCA2_FIDWTPW02SK<br>MDE | AGTN01074107.1 | 340-257 | ATATTGTAAAGGCAAACCTTATTGAAAAGTAAGGGCGCAAAGCTATAGGGCCTTGTAGGAAACTATGTGGTAGCCAGTTGCCATT                         |

|                                                    |                |                                                                                       |                                                                                                              |
|----------------------------------------------------|----------------|---------------------------------------------------------------------------------------|--------------------------------------------------------------------------------------------------------------|
| Bioreactor metagenome<br>PBDCA2_FIDWTPW02SM<br>LNC | AGTN01313719.1 | 78-181                                                                                | AAGTGATAAAGGCAAATTTACTGAAAAGTAAAGACGCAAAGCCAAGGGTCTAAGGTCCCGGCTCCGAATGGGGCGGAACGGGGCTATGACAGCCGGT<br>TACCAAA |
| Bioreactor metagenome<br>PBDCA2_FIDWTPW02SU<br>QS2 | AGTN01050262.1 | 241-327                                                                               | TCACGATAAAGGCAAACCTTGATGAAAATCAAGGACGCAAAGCCATGGGTCTAAGGCAAGAGATTGCTATGATTGCCAAGCCGCCGAA                     |
| Bioreactor metagenome<br>PBDCA2_FIDWTPW02T43<br>85 | AGTN01254918.1 | 53-1                                                                                  | CTTTTGCAAGGGCATACCTGTCCGAAAGGCAGGGACGCAAAGCCTCCGGTCTA                                                        |
| Bioreactor metagenome<br>PBDCA2_FIDWTPW02TI4<br>FN | AGTN01072540.1 | 70-1                                                                                  | TAAAGCCAAGGGCAAACCTGCCAAAAGGCAGGGACGCAAAGCCGTAGGGTCTAAGGCGCATTAAAGCGCTA                                      |
| Bioreactor metagenome<br>PBDCA2_FISUTAU01A3<br>WRC | AGTN01735905.1 | 207-120                                                                               | CAATAATTTTGGCAAACACGTTTAAAAACGTGGGCGCAAAGCTTTGGAGCCTAATCTGAGTTTTCGGAATGGCAGTCCGGCCGCATTG                     |
| Bioreactor metagenome<br>PBDCA2_FISUTAU01A76<br>SY | AGTN01522678.1 | 196-282                                                                               | AAGAGTTATGGGCAGATCAGTCGAAAGGCTGAGGCGCAAAGTATGGAGCCTAAGGCACGTTTGTGCTATGGCAGTCCGGCTGCAATT                      |
| Bioreactor metagenome<br>PBDCA2_FISUTAU01AIZ<br>SH | AGTN01572059.1 | 414-330                                                                               | AAAACGAACTGGCAAATCTGCTGAAAGGCAGAGACGCAAACCACGGGTCTAAAGTCTTTCGACCATGACCGCCGGGTGCGCGAA                         |
| Bioreactor metagenome<br>PBDCA2_FISUTAU01AM<br>UT4 | AGTN01234163.1 | 72-1                                                                                  | TAATATTACTGGCAAACCCGTAAAAAGACGGGGACGCAAAGCCACGGGTCTAAGGTGAAAGCTATGACAGCC                                     |
| Bioreactor metagenome<br>AGTN01410772.1            | 216-132        | AAACGATAATAGCAAACCTGCCGAAAGACAGGGACGCAAAGCCACGGGTCTAAAGTCCTTCGACCATGACAGCCGGGTGCGCGAA |                                                                                                              |

|                                                    |                |         |                                                                                                                        |
|----------------------------------------------------|----------------|---------|------------------------------------------------------------------------------------------------------------------------|
| PBDCA2_FISUTAU01APB<br>P9                          |                |         |                                                                                                                        |
| Bioreactor metagenome<br>PBDCA2_FISUTAU01AY3<br>7T | AGTN01471933.1 | 218-303 | CAACGATAAAGGCAAACCCGATGAAAGTCGGGGACGCAAAGCCGTGAGTCTAAAGCTGAAACAGCTATGATAGTCAGGTTGCCGTA                                 |
| Bioreactor metagenome<br>PBDCA2_FISUTAU01AYU<br>ZH | AGTN01513783.1 | 196-270 | GGCCGAAAAGGGCAAACCACCGGAGACGGTGGGACGCAAAGCCTCCGGTCCCAGAAGGATAGCGGGGTTGCCGAA                                            |
| Bioreactor metagenome<br>PBDCA2_FISUTAU01AZ<br>MRJ | AGTN01441826.1 | 192-274 | AAAAGATACTAGCAAATCCAGCGAAAGTTGGAGACGCAAAGCTATGGGTCTAAAGCGCAAGCCACGATTGCCAGGTTGCCTAA                                    |
| Bioreactor metagenome<br>PBDCA2_FISUTAU01B1A<br>N5 | AGTN01431825.1 | 259-343 | TAATGAAAAGAGCAAAGTTGCCGAAAGGTAACGACGCAAAGCTAAAGGGCCTTATTGAATACCAATATGGCAGCCAGTTGCCATT                                  |
| Bioreactor metagenome<br>PBDCA2_FISUTAU01B3Z<br>LG | AGTN01720335.1 | 303-390 | ATATTCCAAGGGCAAACCTTGCCGAAAAGCAAGGACGCAAAGCCATAGGGTCTAAGATGCGAATGCATGATGACAGCCTGCCCGCCGCA                              |
| Bioreactor metagenome<br>PBDCA2_FISUTAU01BG2<br>ZQ | AGTN01336270.1 | 184-270 | GGAGGTCATGGGCAAATCAGCCGAAAGTCTGAGACGCAAAGTAAGGAGCCTAAAGCGCGCTTGTGTTATGGCAGTCCGGCTGCAAAT                                |
| Bioreactor metagenome<br>PBDCA2_FISUTAU01BG4<br>G6 | AGTN01524214.1 | 410-523 | ATCTGCCAATAGCAAATCCGATTAAAGTCGGAGACGCAAAGCCATGGGTCTAAAGCAAATAGGTACGTATAACCAAAATGCCTATTAATTTGCCATGATT<br>GCCAGGTTGCCAAG |
| Bioreactor metagenome<br>PBDCA2_FISUTAU01BHF       | AGTN01286121.1 | 151-67  | AGTTGTGAAATGCAAAATAGACGAAAGTCTGTGACGCAAACTACAGGCTAATTCGGTATGGAATGGCAGCCAGTTGCCGCT                                      |

|                                                    |                |         |                                                                                                   |
|----------------------------------------------------|----------------|---------|---------------------------------------------------------------------------------------------------|
| MZ                                                 |                |         |                                                                                                   |
| Bioreactor metagenome<br>PBDCA2_FISUTAU01BO2<br>GY | AGTN01296642.1 | 473-528 | GATCTGAAATAGCAAACCTGGTGAAAACCTAGGGACGCAAAGCTATTGGGTCTAAGG                                         |
| Bioreactor metagenome<br>PBDCA2_FISUTAU01BSC<br>R6 | AGTN01347944.1 | 413-317 | AATCGATAATAGCAAACCTGCCGAAAGACAGGGACGCAAAGCTCAGGGCCTAAGACAAGCGTTTGACAGCGCTATGTTATGGCAGCCAGTTGCCGAA |
| Bioreactor metagenome<br>PBDCA2_FISUTAU01BT<br>M4W | AGTN01299684.1 | 305-399 | GCACGATCAGGGCTAAACAGGCGAAAGCCTGTGGCGCAAAGCTATAGGGTCTAAGTCCATTGTCTATGGTATGGATATGACAGCCGGTTGCCACT   |
| Bioreactor metagenome<br>PBDCA2_FISUTAU01C0W<br>PN | AGTN01205960.1 | 307-382 | AACTGAAAAAGGCAAAGCCGACTGAAAAGCGGCGACGCAAAGCCACGGGCCTAAACCATCGCATGGTATGGCAGCC                      |
| Bioreactor metagenome<br>PBDCA2_FISUTAU01C2P<br>2K | AGTN01466698.1 | 241-147 | TTTCGCAAAAGGCAAACCTACCATCGAAAGAGTAGGACGCAAAGCCATGGGTCTAAAGCGGTATTGTTCGGCTGCTATGATTGCCAGGTTGCCGTA  |
| Bioreactor metagenome<br>PBDCA2_FISUTAU01C4L<br>Q8 | AGTN01411135.1 | 20-110  | TAAAGCCAAGGGCAAACCCATCAAAAGATGGGGACGGCAAAGCCATAGGGTCTAAGGTGCTTTACTGCGCTATGATAGCCTGGCTGCCAAA       |
| Bioreactor metagenome<br>PBDCA2_FISUTAU01CLE<br>6U | AGTN01473584.1 | 39-123  | TTCTGTAAAGGCAAACCGCTTGAAAAATCGGGACGCAAAGTCAGGAATCTAAAGCTTATCAGCAATGATCGTCCGGCTGCCATA              |
| Bioreactor metagenome<br>PBDCA2_FISUTAU01CUI<br>R3 | AGTN01212763.1 | 249-161 | TAAAGCAGAGGGCCACCCGTTGAAAAACGGGGGTACAAAGCCATAGGGCCTAAGCGTTTTTAAACGCTATGATAGATTGGCTGTCAAG          |

|                                                    |                |                                                                                               |                                                                                           |
|----------------------------------------------------|----------------|-----------------------------------------------------------------------------------------------|-------------------------------------------------------------------------------------------|
| Bioreactor metagenome<br>PBDCA2_FISUTAU01D02<br>UM | AGTN01695387.1 | 105-19                                                                                        | AACTGAAAAGAGCAAACCTGTCGAAAGGCGGGACGCAAAGCCGCAAGTCTAAGGCATGTGGGTGCTATGACCGTTGGGTTGCCAGG    |
| Bioreactor metagenome<br>PBDCA2_FISUTAU01D2Y<br>J2 | AGTN01306259.1 | 34-123                                                                                        | TAGAGAAAAGGGCAAACCTTGCCGAAAGGTAAGGACGCAAAGCCAAAGGGTCTAAATGGCAAAGCCATTACGATAGCCTGGTTGCCAAA |
| Bioreactor metagenome<br>PBDCA2_FISUTAU01DLU<br>A2 | AGTN01190950.1 | 355-271                                                                                       | GTACGATAAAGGCAAAGCTGCCGAAAGGCTGCGACGCAAACTAGAGGGTCTAAGGGTGTCCGCCTATGACAGCCAGTTGCTCCG      |
| Bioreactor metagenome<br>PBDCA2_FISUTAU01DSI3<br>S | AGTN01139688.1 | 81-1                                                                                          | AACCGATAATCGCAAACCCAATGAAAGTTGGGGACGCAAAGCCACGGATCTAAAGCGAAACGCCATGATCGCCGGGTTGCC         |
| Bioreactor metagenome<br>PBDCA2_FISUTAU01DTC<br>F3 | AGTN01745846.1 | 434-518                                                                                       | TGACGAAAAGGGCAAACCCGGTGAAAGCCGGGGATGCAAAGCCATAGCCTGACCTGTGCAAATATAATCATGCAGGATTGCAGTA     |
| Bioreactor metagenome<br>PBDCA2_FISUTAU01EDB<br>V7 | AGTN01545926.1 | 106-30                                                                                        | ATGCGATACTACTAAACCATCCGCGAGGGTGGGGCGGAAAGCCCATCGGGTCTCACCGAGACAGCCGGGTTGCCGAA             |
| Bioreactor metagenome<br>PBDCA2_FISUTAU01EG<br>W1X | AGTN01453008.1 | 177-263                                                                                       | AACTGAAAAGAGCAAACCTGTCGAAAGGCGGGACGCAAAGCCGCAAGTCTAAGGCATGTGGGTGCTATGACCGTTGGGTTGCCAGG    |
| Bioreactor metagenome<br>PBDCA2_FISUTAU01EYX<br>SC | AGTN01552693.1 | 1-79                                                                                          | TAATAGCAAACCTGCCGAAAGACAGGGGCGCAAAGCCACGGGTCTAAAGTCCTTCGACCATGACAGCCGGGTTGCCGAA           |
| Bioreactor metagenome<br>AGTN01557057.1            | 304-212        | CGTTGAAAAAGGCAAGGTTGCGCCGAAAGGCCTTCCACGCAAAGCCACGGGCCTAATCTGCAATCCATGCAGCATGGCAGCCGGGCCACCAAT |                                                                                           |



|                                                          |                |         |                                                                                                          |
|----------------------------------------------------------|----------------|---------|----------------------------------------------------------------------------------------------------------|
| PBDCA2_FUFP16434_b2                                      |                |         |                                                                                                          |
| Bioreactor metagenome<br>PBDCA2_FUFP23154_g1             | AGTN01211212.1 | 98-191  | CTGTGACAAGGGCAAACCCGTCGCAAGACGGGGCGCAAAACCAGGGGTCCAACCGCGGCAATAGCTGGGGCTTGGATGGCCCGGCTCCCGAA             |
| Bioreactor metagenome<br>PBDCA2_FUFP24611_g1             | AGTN01688783.1 | 715-637 | AGCCGATAATACTAAACCATCCGCGAGGATGGGGCGGAAAGCCCACAGGGTCTCTCGTTTCAGACAGCCGGGTGCGCGAA                         |
| Bioreactor metagenome<br>PBDCA2_GBB5CE401A00<br>BL_right | AGTN01095788.1 | 193-98  | TAAATATAATAGCAAAACGGGTGAAAGCCCACGACGCAAGCTATAGGGTCTTAATTATTCATAATATTTGAATAATATGATAGCCAGTTACCGTA          |
| Bioreactor metagenome<br>PBDCA2_GBB5CE401A0Z<br>K3       | AGTN01611988.1 | 218-276 | GAACGACAATAGTAAACCTGCCGAAAGGCAGCGACACAAAGCTACAGGGCCTACAGGCG                                              |
| Bioreactor metagenome<br>PBDCA2_GBB5CE401A6E<br>ZV       | AGTN01425959.1 | 331-247 | TTTATAAAAAGGCAAACTTTTCGAAAGGAAGTGACGCAAGCTACGAGTCTAAAGCAGTAATGCGATGACAGTCGGGTTGCATGA                     |
| Bioreactor metagenome<br>PBDCA2_GBB5CE401A9F<br>Z8_left  | AGTN01748236.1 | 201-103 | AGCAATATTTGGCAAAACCGGGGAAACCCGGCGACGCAAAAGCTAAAGGGTCTAAAGCCTGAAGCCTTGAGGGCTAAGGTTATGACAGCCGGTTGCGC<br>GA |
| Bioreactor metagenome<br>PBDCA2_GBB5CE401AK<br>RYJ_left  | AGTN01582068.1 | 157-61  | AAGCGACAATGGCAAAACCTGGCGAAAGCCAGGGGACGCAAAAGCCACGGGGCTTAAGGCCGGATGTATCGAACGGACCAGCCAGCCGGGTGCCGA<br>A    |
| Bioreactor metagenome<br>PBDCA2_GBB5CE401B32<br>AJ_left  | AGTN01312481.1 | 218-124 | TCCTCGAACCGGCAAAACCCGTCGTAAGGCGGGGACGCAAAAGCTATGGGTCCGTCCAAAGTGCGTAGCCGAACAACGGATCGCCAGGCTACCAAA         |
| Bioreactor metagenome<br>PBDCA2_GBB5CE401B5              | AGTN01040078.1 | 57-146  | GGACGAAAAGGACAAACCCAGCGAAAGCCGGAGACGCAAAAGCTACAGGGCCTAAAATGCAGACAAGCATGATGACAGCCTGGCTGCCGTA              |

|                                                          |                |         |                                                                                                                                                                                         |
|----------------------------------------------------------|----------------|---------|-----------------------------------------------------------------------------------------------------------------------------------------------------------------------------------------|
| WYJ_left                                                 |                |         |                                                                                                                                                                                         |
| Bioreactor metagenome<br>PBDCA2_GBB5CE401BB<br>MMA_right | AGTN01709558.1 | 143-23  | AAATGTGAAAAGCAAAGCTGGCGAAAGCCAGCGACGCAAAGCCAAGGGTCTAAACCTCTTTAATTTTAGTGCTTTAGGTGAAAAGCTCCGTAAAAG<br>AGATACGACAGCCGGTTGCCGCT                                                             |
| Bioreactor metagenome<br>PBDCA2_GBB5CE401BE<br>HNU       | AGTN01502987.1 | 157-60  | AAGCGATAATAGCAAACCTTGCTGAAAAGCAAGGACGCAAAGCCAAGGGTCTAAGGTCTTGAGAGACGGCTCAAAAGACGATGACAGCCGGTTGCCGA<br>A                                                                                 |
| Bioreactor metagenome<br>PBDCA2_GBB5CE401BN<br>Z0A_right | AGTN01727425.1 | 139-224 | CGTTGAAAAAGGCAAAGCCGCCGAAAGGCGGCGACGCAAAGCCACGGGCCTAAAGCGTGAAACGCAACGGCGCCGGGCCGCAAT                                                                                                    |
| Bioreactor metagenome<br>PBDCA2_GBB5CE401BPA<br>20_right | AGTN01607320.1 | 263-172 | ACTCCGAAACGGCAAACCTGTTCGAAAGACTGGGACGCAAAGCTAAGGGTCTAAGTCCCATCCGCAGTGGGATATGATCGCCTGGCTGCCGAA                                                                                           |
| Bioreactor metagenome<br>PBDCA2_GBB5CE401BSA<br>OK_left  | AGTN01189980.1 | 21-107  | AAGCGTTAATAGCAAACCTTGTGAAAAGGCAAGGACGCAAAGCCGTTGGGTCTAAGGTGCTTAGCACTATGACAGCCTGGTTGCCGTA                                                                                                |
| Bioreactor metagenome<br>PBDCA2_GBB5CE401BT<br>MHU_left  | AGTN01299357.1 | 67-1    | AATCGATAATAGCAAAACCGGCGAAAGCCGGCGACGCAAAGCTAAGGGTCTAAGGCCGTGTGAAAATG                                                                                                                    |
| Bioreactor metagenome<br>PBDCA2_GBB5CE401BW<br>Y5C       | AGTN01411218.1 | 91-165  | CCTCGATAAGGGCAAACCATCCGCGAGGGTGGGACGCAAAGCCATGGGTCCCTCTGGGATCGCCAGGTTGCCGAA                                                                                                             |
| Bioreactor metagenome<br>PBDCA2_GBB5CE401BX<br>BYB_right | AGTN01686969.1 | 79-259  | ACCCGATAATAGCAAATCCTGCGAAAGCTTGAGACGCAAAGCCACGGATCTAACGCTAAGGTTAGCTAAATGATTATTTACACTTTTCTGAAATGCACA<br>TGGACTAATGTGTGTTTCAGAAAAATATTAGTGGAAGTTATCATTAGCAAATCCTAACTGCCATGATCGCCGGGCTACCG |

|                                                          |                |                                                                                       |                                                                                                                        |
|----------------------------------------------------------|----------------|---------------------------------------------------------------------------------------|------------------------------------------------------------------------------------------------------------------------|
| Bioreactor metagenome<br>PBDCA2_GBB5CE401C56<br>3G_left  | AGTN01179694.1 | 209-123                                                                               | TATTGGCAAACCTTATCCGAAAGGTAAGGACGCAAAGCCATGGGTCTAACGGCCCTGACGCCGGGCTTATGACTGCCAGGTTGCGGAC                               |
| Bioreactor metagenome<br>PBDCA2_GBB5CE401CK4<br>4J_left  | AGTN01244058.1 | 145-61                                                                                | CCCACGTTGTGGCAAAGCCCGCGAAAACGGGTGACGCAAAGCTAAAGGGCCTAAGGGCGCAAGCCTATGGCAGCCAGTTGCCGGG                                  |
| Bioreactor metagenome<br>PBDCA2_GBB5CE401CK<br>UO6_right | AGTN01446196.1 | 198-86                                                                                | TCACGATAATGGCAAACCTATGGGAAACCATGGGGACGCAAAGCACAGGGGCCTAAACATCCGACCAATGCGTACAAATATGCGATCGGATGCACGGC<br>AGCCCCGGCCGCCGAA |
| Bioreactor metagenome<br>PBDCA2_GBB5CE401CY<br>RX7_left  | AGTN01303612.1 | 188-272                                                                               | TCGAATAATGGGCAAACCTCATCGAAAGGTGAGGGCGCAAAGCTAAAGGGGCTACGGTGCTCGAAGAGACACTAAGCATTTTCAGTC                                |
| Bioreactor metagenome<br>PBDCA2_GBB5CE401D1Q<br>SL       | AGTN01519402.1 | 238-177                                                                               | GGCAGCGACGCAAAGCTAAAGGGCCTGAAGGGCGTTTTTCGTCTATGGCAGCCAGTTGCCGCA                                                        |
| Bioreactor metagenome<br>PBDCA2_GBB5CE401D4U<br>4E_right | AGTN01166220.1 | 137-43                                                                                | CGTTGAAAAAGGCAAAGCCGCCGAAAGGCGGCGACGCAAAGCCACGGGCCTAAATCGCTCCCAATTGAAAGCGATATGGCAGCCGGGTCGCCAGC                        |
| Bioreactor metagenome<br>PBDCA2_GBB5CE401DK<br>LJ3_right | AGTN01197001.1 | 281-367                                                                               | TATTTTCATTAGGCAAACCCCGTCGAAAGAGAGGGGACGCAAAGCCATGGGTCTTCAAACATTTGTTTATGACTGCCAGGTTGCATGT                               |
| Bioreactor metagenome<br>PBDCA2_GBB5CE401E4F<br>M3       | AGTN01177985.1 | 7-83                                                                                  | TCACGATAATACTAAACCATTCGCGAGGATGGGGCGGAAAGCCTACAGGGTCTTACTGAGACAGCCGGGTTGCCGAA                                          |
| Bioreactor metagenome<br>AGTN01221495.1                  | 19-103         | AATATCGTTTAGTAAACCCGTCGAAAGGCGGGGACACAAAGCTACGGGTCTAAAGCATTTTGTCTATGACAGCCGAGTTGCAAGA |                                                                                                                        |

|                                                         |                |                 |                                                                                                            |
|---------------------------------------------------------|----------------|-----------------|------------------------------------------------------------------------------------------------------------|
| PBDCA2_GBB5CE401E5Z<br>YF_left                          |                |                 |                                                                                                            |
| Bioreactor metagenome<br>PBDCA2_GBB5CE401EI4<br>ZX_left | AGTN01237493.1 | 104-1           | AACGACAAACGGCAAACCTGGCGAAAGTCAGGGGCGCAAAGCTAAAGGGCCTGAAAACGTTATTCGCGAGGACACAAGGAAACGTATAATGGCAGCCAGTTAC    |
| Bioreactor metagenome<br>PBDCA2_GBB5CE401ER<br>GHN      | AGTN01570293.1 | 75-1            | TAGAGAAAAGGGCAAACCAACTGAAAAGTTGGGACGCAAAGCCAAGGGTCTACTGTGGCGAAAGCCACTATGATA                                |
| Blastopirellula marina DSM<br>3645 1099463000698        | AANZ01000050.1 | 14174-14099     | CCTCGAAAAAGGCAAACCGATCGTGAGGTCGGGACGCAAAGCCAAGGGCCACGTAAGTGGACGCCAGGCTGCCGAA                               |
|                                                         |                |                 |                                                                                                            |
| blood disease bacterium<br>R229                         | FR854083.1     | 151902-151982   | CTGTTGCATTTGCAAAGCTGGAGTGACCCGGCGACGCAAAGCCAGGGGGACTTCCGTATCGGAAGTCAGCCAGTTGTCCGC                          |
|                                                         |                |                 |                                                                                                            |
| Brevibacillus brevis NBRC<br>100599 DNA                 | AP008955.1     | 1128088-1128005 | AAATGCAAAAGGCAAAGTCATCGAAAGGTGGCGACGCAAAACCACGGGTCTACAGTCTTTGACCATGATAGCCGGGTTGCCATC                       |
| Brevibacillus brevis NBRC<br>100599 DNA                 | AP008955.1     | 5867835-5867923 | ATATCGAAACGGCATAACCCGGGGAAATCCGGCGACGCAAAGCTACAGGGGCTACCTCCGCAACAGCGGACACGCTTGCCAGCTACCGAA                 |
| Brevibacillus brevis NBRC<br>100599 DNA                 | AP008955.1     | 5961464-5961364 | GAATGACAAAGGCAAACCTTGCTGAAAGGCAGGGACGCAAAGCCACGGGTCTAAGGACGAAGGTCAAATGACTTTCGCAGCTAGGACAGCCGGGTTGC<br>CATA |
| Brevibacillus brevis NBRC<br>100599 DNA                 | AP008955.1     | 4601883-4601798 | GCTATGAATGGGCAAACCCATTGAAAAGTGGGGACGCAAAGCCACGGGCCTAATGTACACGTTACGATGGCAGCCGGGTTGCCAAC                     |
|                                                         |                |                 |                                                                                                            |
| Burkholderia phytofirmans<br>PsJN chromosome 1          | CP001052.1     | 1667937-1667858 | GCGCAGTTTGGGCAAACCCGGAGCGATCCGGCGACGCAAAGCTACAGGGACTCCCTTGCGGGAGTTTGCCAGTTGCCCGC                           |

|                                                                |                |                 |                                                                                                    |
|----------------------------------------------------------------|----------------|-----------------|----------------------------------------------------------------------------------------------------|
| Burkholderia sp. Ch1-1<br>ctg00164                             | ADNR01000015.1 | 78057-77978     | GCGCAGTTTGGGCAAACCCGGAGCGATCCGGCGACGAAAACCTATAGGGACTCCCTTGCGGGAGTTTGCCAGTTGCCCGC                   |
|                                                                |                |                 |                                                                                                    |
| Butyrivibrio crossotus DSM<br>2876<br>B_crossotus-1.0_Cont20.1 | ABWN01000030.1 | 140002-139920   | TTGAACAATGGGCAAACCAATCGAAAGATTGGGACGCAAAGCCAAGGACCTTCCCTTAACAGGATGGTAGCCGGTTGCACGG                 |
| Butyrivibrio crossotus DSM<br>2876<br>B_crossotus-1.0_Cont20.1 | ABWN01000030.1 | 140139-140057   | TTGAATATTAGGCAAACCAATCGAAAGGTTGGGACGCAAAGCCAAGGGCCTTCCCTTAACAGGGTGGCAGCCGGTTGCATAT                 |
| Butyrivibrio crossotus DSM<br>2876<br>B_crossotus-1.0_Cont22.1 | ABWN01000043.1 | 4363-4275       | ATTATGAATGGGCATACCCGCAGAAATGTGGGGTCGCAAAGCTAGGGGTCTAAGGGGATTATATTTCTATGATAGCTCGGCTGCAACA           |
| Butyrivibrio proteoclasticus<br>B316 chromosome 1              | CP001810.1     | 2398853-2398928 | TTTGATATCGGGCAAAGCAAGCGAAAGCTTGTGGCGCAAAGCTATAGGGACTTTAACATGTCAGCCAGTTGCATCT                       |
| Butyrivibrio proteoclasticus<br>B316 chromosome 1              | CP001810.1     | 1091136-1091221 | ATCAAATAAAGGCAAAGCCATTGGAAAATGGTGACGCAAAGCTATAGGGTCTCAATCGCATATGCGACAGACAGCCAGTTGCTGGC             |
|                                                                |                |                 |                                                                                                    |
| Caldalkalibacillus<br>thermarum TA2.A1 ctg178                  | AFCE01000088.1 | 17-103          | AACCGATAAAGGCAAACTGTGGAAACGCAGTGACGCAAAGCTACAGGGGCTAAGGTCCGCCAGGGCTATGCCAGCCAGCTACCGGT             |
| Caldalkalibacillus<br>thermarum TA2.A1 ctg242                  | AFCE01000160.1 | 14647-14734     | CGTTTGAAAGGGCAAAGCTACGGAAACGTAGTGACGCAAAGCTACAGGGGCTAAGGTTGTTCAACAACCTATGCCAGCCAGCTGCCGTT          |
|                                                                |                |                 |                                                                                                    |
| Caldicellulosiruptor bescii<br>DSM 6725                        | CP001393.1     | 1980616-1980527 | ATATCGAAAGGGCAAACCTGTGCGAAAGGCAGGGGCGCAAAGCCATGGGCCTGTGCGAAGTAAAACTTCCTATGGTTGCCAGGCTGCCGAA        |
| Caldicellulosiruptor bescii                                    | CP001393.1     | 1919845-1919748 | TGTCGATAAAGGCAAACCTGTGCGAAAGGCAGGGGCGCAAAGCCATGGGTCTGTGCGAAAAGGGTTTTACCTTTTCCTATGATTGCCAGGCTGCCGAA |

|                                            |            |                 |                                                                                                    |
|--------------------------------------------|------------|-----------------|----------------------------------------------------------------------------------------------------|
| DSM 6725                                   |            |                 |                                                                                                    |
| Caldicellulosiruptor bescii<br>DSM 6725    | CP001393.1 | 1974651-1974562 | TAGTCGAAAGGGCAAACCTGTCGAAAGGCAGGGGCGCAAAGCCATGGGCCTGTCGGAAGAAAACTTCCTATGGTTGCCAGGCTGCCGAA          |
| Caldicellulosiruptor hydrothermalis 108    | CP002219.1 | 943671-943760   | TGTCGACAAAGGCAAACCTGTCGAAAGGCAGGGGCGCAAAGCCATGGGCCTGTCGGAAGTACAGCTTCCTATGGTCGCCAGGCTGCCGAA         |
| Caldicellulosiruptor hydrothermalis 108    | CP002219.1 | 2712272-2712180 | TCCTGAAAAGGGCAAACACAGGGAAACCTGGGGCGCAAAGCCATGGGCCTATCGTGGAAGTTTACCTCCCTATGGTCGCCAGGCTGCCTGC        |
| Caldicellulosiruptor kristjanssonii 177R1B | CP002326.1 | 897466-897555   | TGTCGACAAAGGCAAACCTGTCGAAAGGCAGGGGCGCAAAGCCATGGGCCTGTCGGAAGAAAGCCTTCCTATGGTCGCCAGGCTGCCGAA         |
| Caldicellulosiruptor kronotskyensis 2002   | CP002330.1 | 989712-989801   | ATATCGAAAGGGCAAACCTGTCGAAAGGCAGGGGCGCAAAGCCATGGGCCTGTCGGAAGAAAATCTTCCTATGGTTGCCAGGCTGCCGAA         |
| Caldicellulosiruptor kronotskyensis 2002   | CP002330.1 | 996348-996437   | TAGTCGAAAGGGCAAACCTGTCGAAAGGCAGGGGCGCAAAGCCATGGGCCTGTCGGAAGAAAACTTCCTATGGTTGCCAGGCTGCCGAA          |
| Caldicellulosiruptor kronotskyensis 2002   | CP002330.1 | 1045800-1045897 | TGTCGATAAAGGCAAACCTGTCGAAAGGCAGGGGCGCAAAGCCATGGGTCTGTCGGAAGAGGGTTTTTACCTTTTCCTATGATTGCCAGGCTGCCGAA |
| Caldicellulosiruptor lactoaceticus 6A      | CP003001.1 | 1572387-1572298 | TGTCGACAAAGGCAAACCTGTCGAAAGGCAGGGGCGCAAAGCCATGGGCCTGTCGGAAGAAAGCCTTCCTATGGTCGCCAGGCTGCCGAA         |
| Caldicellulosiruptor obsidiansis OB47      | CP002164.1 | 2488995-2488906 | TCCTGAAAAGGCAAACACAGGGAAACCTGTGGGCGCAAAGCCATGGGCCTGTCGGGGGAAAAACCCCTATGGTTGCCAGGCTGCCAGG           |
| Caldicellulosiruptor obsidiansis OB47      | CP002164.1 | 1810549-1810460 | ATATCGAAAGGGCAAACCTGTCGAAAGGCAGGGGCGCAAAGCCATGGGCTTGTCGGAAGTAAACTTCCTATGGTTGCCAGGCTGCCGAA          |
| Caldicellulosiruptor obsidiansis OB47      | CP002164.1 | 1806882-1806793 | TGGTCGAAAGGGCAAACCTGTCGAAAGGCAGGGGCGCAAAGCCATGGGCCTGTCGGAAGAAAAACTTCCTATGGTTGCCAGGCTGCCGAA         |
| Caldicellulosiruptor obsidiansis OB47      | CP002164.1 | 1764638-1764548 | TGTCGACAAAGGCAAACCTGTCGAAAGGCAGGGGCGCAAAGCCATGGGCCTGTCGGAAGAGAAAACTTCCTATGGTTGCCAGGCTGCCGAA        |

|                                                                |                |                 |                                                                                                       |
|----------------------------------------------------------------|----------------|-----------------|-------------------------------------------------------------------------------------------------------|
| Caldicellulosiruptor<br>owensensis OL                          | CP002216.1     | 1656306-1656217 | TGTCGAGAAGGGCAAACCTGTCGAAAGGCAGGGGCGCAAAGCCATGGGCCTGTCGGAAGAAAATCTTCCTATGGTCGCCAGGCTGCCGAA            |
| Caldicellulosiruptor<br>owensensis OL                          | CP002216.1     | 2385548-2385460 | TCCTGAAAAAGGCAAACACAGGGAAACCTGTGGGCGCAAAGCCATGGGCCTGTCGGGAAAAGTCCCCTATGGTCGCCAGGCTGCCAGG              |
| Caldicellulosiruptor<br>saccharolyticus DSM 8903               | CP000679.1     | 1205666-1205755 | TGGTCGAAAGGGCAAACCTGTCGAAAGGCAGGGGCGCAAAGCCATGGGCCTGTCGGGAGTAAACTTCCTATGGTTGCCAGGCTGCCGAA             |
| Caldicellulosiruptor<br>saccharolyticus DSM 8903               | CP000679.1     | 912898-912799   | TGTCGACAAAGGCAAACCTGTCGAAAGGCAGGGGCGCAAAGCCATGGGTCTGTCGGAAGTATAGAGGACCTTTTCCTATGATCGCCAGGCTGCCG<br>AA |
| Caldicellulosiruptor<br>saccharolyticus DSM 8903               | CP000679.1     | 1202000-1202089 | ATATCGAAAGGGCAAACCTGTCGAAAGGCAGGGGCGCAAAGCCATGGGCCTGTCGGAAGTAAACTTCCTATGGTTGCCAGGCTGCCGAA             |
| Caldicellulosiruptor<br>saccharolyticus DSM 8903               | CP000679.1     | 2504398-2504301 | TGTCGATAAAGGCAAACCTGTCGAAAGGCAGGGGCGCAAAGCCATGGGTCTGTCGGAAGGGTTTTACCTTTTCCTATGATCGCCAGGCTGCCGAA       |
|                                                                |                |                 |                                                                                                       |
| Campylobacteriales<br>bacterium GD 1<br>ctg_1106149034614      | ABXD01000002.1 | 14206-14295     | ATTGTATTAGCCAAACTTATTGCGAAATAAGGACGGAAGCTGTGAGTCTTAAATTTTGTGTAATAAGATTGTCTAGTTGCACTT                  |
|                                                                |                |                 |                                                                                                       |
| Candidatus Accumulibacter<br>phosphatis clade IIA str.<br>UW-1 | CP001715.1     | 1004038-1004135 | CTGATTAAAGGCAAACGAGGGAAACCTCCGGACGCAAAGCCGCGGACCCTACCCTGAGTTGTCAGATGAGCTCAGAAGGGTGGCCGGGTTGCCCG<br>A  |
| Candidatus Desulfurudis<br>audaxviator MP104C                  | CP000860.1     | 1941831-1941917 | TCTGATTACAGGGCAAAGTCGCCGAAAGGTGACGGCGCAAACTAGAGGGGCTACAGCGATAATACGCCAAGCCAGCCAGTTGCCGGA               |
| Candidatus Desulfurudis<br>audaxviator MP104C                  | CP000860.1     | 470626-470536   | TCCTAGAAAGGGCAAACCTGGCGAAAGCCAGGGACGCAAAGCTACGGGTCTAAAGCTTTCAGGCGAAAGCCAGGACCGCCGGGCCGCGCCACT         |
| Candidatus Desulfurudis                                        | CP000860.1     | 1860186-1860097 | ACCCCGAAAGGGCAAACCGGTACGAAAGTCCGGGACGCAAAGCTACGGGTCTTAAGTTCCATGGGGAATAGGACGGCTGAGCCGCTGGG             |

|                                                               |                |                 |                                                                                          |
|---------------------------------------------------------------|----------------|-----------------|------------------------------------------------------------------------------------------|
| audaxviator MP104C                                            |                |                 |                                                                                          |
| Candidatus<br>Methyloirabilis oxyfera<br>complete genome.     | FP565575.1     | 196276-196197   | TTCCGATAAAGGCAAACCCAGTCGCGAGGCTGGGACGCAAAGCCACCGGTCAGCAAACGGGCTGACAGCGGGGTTACCGAA        |
|                                                               |                |                 |                                                                                          |
| Carboxydibrachium<br>pacificum DSM 12653<br>ctg_1106511212248 | ABXP01000171.1 | 25651-25564     | CTTCGATAAAGGCAAACCCGTCGAAAGGCGGGGGCGCAAAGCCACGGGCCTAAATCCCTGATTGGGACATGGTAGCCGGGCTGCCGAA |
| Carboxydotherrus<br>hydrogenoformans Z-2901                   | CP000141.1     | 900392-900476   | AAACGTAAAGGGCAAACCCGGCGAAAGCCGGCGACGCAAAGCTACAGGGGCTAAAGCCGTAAGGCTATGCCAGCCAGCTGCCAAA    |
| Carboxydotherrus<br>hydrogenoformans Z-2901                   | CP000141.1     | 851296-851384   | TTCCGAAAAAGGCAAACCCGGCGAAAGCCGGGGACGCAAAGCTACAGGGGCTAAAGCAGGTTGTCTGCTATGCCAGCCAGCTGCCGAA |
| Carboxydotherrus<br>hydrogenoformans Z-2901                   | CP000141.1     | 777679-777763   | TACCGATAAAGGCAAACCCGGCGAAAGCCGGCGACGCAAAGCTACAGGGGCTAAGGCCGTAAGGCTATGCCAGCCAGCTGCCGAA    |
| Carboxydotherrus<br>hydrogenoformans Z-2901                   | CP000141.1     | 90445-90359     | TGTCGATAAAGGCAAACCCGGCGAAAGCCGGTGACGCAAAGCTACAGGGGCTAAAGCGAATTTTCGCCATGCCAGCCAGCTGCCGAA  |
| Carboxydotherrus<br>hydrogenoformans Z-2901                   | CP000141.1     | 906921-907004   | CTTTGTCAAAGGCAAACCCGGTGAAAGCCGGGGGCGCAAAGCTACAGGGGCTAAAGCTTAAAGCTAAGCCAGCCAGCTGCCAAA     |
| Carboxydotherrus<br>hydrogenoformans Z-2901                   | CP000141.1     | 875560-875646   | CGAAAAGTTTGCAAACCCGGCGAAAGCCGGCGACGCAAAGCTAAAGGGGCTAAGCGGGTAACCGCTATGCCAGCCAGCTGCCGGG    |
| Carboxydotherrus<br>hydrogenoformans Z-2901                   | CP000141.1     | 785822-785906   | CTTTGTC AATAGCAAACCCGGCGAAAGCCGGCGACGCAAAGCTACAGGGGCTAAAGCCGTAAGGCTATGCCAGCCAGCTGCCGAA   |
|                                                               |                |                 |                                                                                          |
| Cellulomonas fimi ATCC<br>484                                 | CP002666.1     | 2316135-2316209 | GTCAGACAAGGGCACACCCGTCGCGAGGCGGGGCCGCAAAGCCACGGGACCCACGCGGTCAGCCGGGCTGCCGAC              |



|                                                                             |                |                 |                                                                                                  |
|-----------------------------------------------------------------------------|----------------|-----------------|--------------------------------------------------------------------------------------------------|
| Cellulomonas fimi ATCC<br>484                                               | CP002666.1     | 243861-243935   | TCAGCGAAACGGCAAACCTCCGCAAGGGGGGACGCAAAGCCACGGGACCCACGAGGTCAGCCGGGCTACCGAA                        |
| Cellulomonas fimi ATCC<br>484                                               | CP002666.1     | 2514437-2514363 | CAGCGAACACGGCAAACCCGCCGCAAGGTGGGGACGCAAAGCCACGGGACCCACGAGGTCAGCCGAGCTACCGAA                      |
| Cellulomonas flavigena<br>DSM 20109                                         | CP001964.1     | 3848833-3848759 | TCAGCGAAACGGCAAACCTCCGCAAGGAGGGGACGCAAAGCCACGGGACCCACGCGGTCAGCCGGGCTACCGAA                       |
| Cellulomonas flavigena<br>DSM 20109                                         | CP001964.1     | 2407306-2407232 | AGCGACAAACGGCAAACCCGCCGCAAGGTGGGGACGCAAAGCCACGGGGCCACGAGGTCAGCCGAGCTACCGAA                       |
|                                                                             |                |                 |                                                                                                  |
| Clostridiales bacterium<br>1_7_47_FAA cont2.6                               | ABQR01000006.1 | 160585-160491   | TTGAAGACCGGGCATAGCTGTCGAAAGGCAGTGTGCGAAAGCTATAGGGGTTTCGCCTTCCGCAGTGCGGAAGGAAAGCCAGCCAGTTGTATAT   |
| Clostridiales sp. SSC/2 draft<br>genome.                                    | FP929061.1     | 2108567-2108642 | AAAGATTCTAGGCAAAACAGACGAAAGTCTGTGACGCAAAGCTAAAGGGCCTGTAAAATGGCAGCCAGTTGCAGAA                     |
| Clostridiales sp. SSC/2 draft<br>genome.                                    | FP929061.1     | 1293086-1293176 | TTATTTTAAAGGCAAACTGTTGAAAAGCAGGGGCGCAAAGCCAGAAGGGACTAAAGTCAGAAAGCTTGACCATGTGACCCGGTTGCCACT       |
| Clostridiales sp. SSC/2 draft<br>genome.                                    | FP929061.1     | 1054036-1054123 | TTATTCATAGGGCAAACCTGTTGAAAAGCAGGGACGCAAAGCCAGAAGGGTCTAAGGTCTTATTGGACTATGACAGCCGGTTGCCACA         |
| Clostridium asparagiforme<br>DSM 15981<br>C_asparagiforme-1.0_Cont5<br>.9   | ACCJ01000143.1 | 25178-25272     | GTGAATAACGGGCACAACCTGTCGAAAGGCAGTGTGCGAAAGCTATAGGGGCTTCTCCTTCCGGCCGTGACCAGGGAAAGCCAGCCAGTTGTCTGA |
| Clostridium asparagiforme<br>DSM 15981<br>C_asparagiforme-1.0_Cont6<br>.295 | ACCJ01000366.1 | 4015-3933       | TGAAAGATTGGGCAAACCGTCGAAAGGCGGCGACGCAAAGCTACAGGGGCTTACCCGGATGGTAAGCCAGCCAGCTGCTCTC               |

|                                                                             |                |                 |                                                                                            |
|-----------------------------------------------------------------------------|----------------|-----------------|--------------------------------------------------------------------------------------------|
| Clostridium asparagiforme<br>DSM 15981<br>C_asparagiforme-1.0_Cont6<br>.295 | ACCJ01000366.1 | 3755-3673       | AGACTATAAAGGCAAACCCGTCGAAAGGCGGCGCGCAAAGCTACAGGGGCTAAACCGAACGGTATGCCAGCCAGTTGCAGGA         |
| Clostridium asparagiforme<br>DSM 15981<br>C_asparagiforme-1.0_Cont6<br>.357 | ACCJ01000435.1 | 32235-32148     | CTACATACTTGGCAAACTGATGAAAGTCAGCGACGCAAAGCTAAAGGGTCTAAATCATAGTATATGATATGACAGCCAGTTGCCCCCT   |
| Clostridium beijerinckii<br>NCIMB 8052                                      | CP000721.1     | 1066054-1066144 | AATATCAATAGGCACACTTATTGAAAAATAGGGTCGCAAAGCTATGAGTCTAAGGAAAAATTAATTTTCTATGATTGTCAGGTTGCCAAA |
| Clostridium beijerinckii<br>NCIMB 8052                                      | CP000721.1     | 4931184-4931096 | AAATGTTACTAGCACACTTATTGAAAGATAAGGCCGCAAAGCCATGAGTCTAAGGGAATTTACATTTCTATGATTGTCAGGTTGCCAAA  |
| Clostridium beijerinckii<br>NCIMB 8052                                      | CP000721.1     | 646595-646680   | ATATTGAATTGGCAAAGCAGTTGAAAACTGTGACGCAAAGCTAGAGGGCCTTTTCCTTTTGAAAGGATGGCAGCCAGTTGCAAGT      |
| Clostridium beijerinckii<br>NCIMB 8052                                      | CP000721.1     | 4634346-4634259 | TATTGATAATAGCACACTTGCCGAAAGGTAGGGCCGCAAAGCTATGGGTCTAAAGAAATTCATTTTCAATGATTGCCAGGTTGCCAAA   |
| Clostridium bolteae ATCC<br>BAA-613<br>C_bolteae-3.0.1_Cont118              | ABCC02000009.1 | 273209-273134   | TAAATATTGGGGCAAAGCACGTGAAAACGTGTGACGCAAACTAGAGGGCCTGTAAGATGGCAGCCAGTTGCATT                 |
| Clostridium bolteae ATCC<br>BAA-613<br>C_bolteae-3.0.1_Cont22               | ABCC02000002.1 | 64098-64013     | AAAAATAATTAGCAAACTGGTGAAAGCTAGTGACGCAAAGCTACAGGGATTTCTCTCTAAAAAGAGGTGTCAGCCAGCTGCATGA      |
| Clostridium bolteae ATCC<br>BAA-613<br>C_bolteae-3.0.1_Cont270              | ABCC02000037.1 | 177159-177084   | ATATTCAGGTAGCAAAGTAGTTGAAAGTCTATGACGCAAAGCTAAAAGGCCTGTGAAATGGTAGCCAGTTGCACGT               |

|                                                                   |                |                 |                                                                                              |
|-------------------------------------------------------------------|----------------|-----------------|----------------------------------------------------------------------------------------------|
| Clostridium botulinum B str.<br>Eklund 17B                        | CP001056.1     | 2563878-2563794 | AAATTTAATAGGCATAGCTAGGGAAATCTAGTGACGCAAAGCTAAAGGGGCTAAAGAAGAAATTCCATGCCAGCCAGTTGCCGAT        |
| Clostridium botulinum B str.<br>Eklund 17B                        | CP001056.1     | 3268396-3268305 | ATATGATAATAGCACACTTGTTGAAAAATAAGGTCGCAAAGCTTATGAGTCTAAGGGAAAGAATTATTTTCTATGATCGTCAGGTTACCAAA |
| Clostridium botulinum B str.<br>Eklund 17B                        | CP001056.1     | 856609-856691   | TAACTGAATAGGCAAACTAATTAAAGTTAGTGACGCAAAGCTATAGGGGCTAAGGAATAATCTATGTCAGCCAGTTGCCGAA           |
| Clostridium botulinum E1<br>str. 'BoNT E Beluga'<br>CLO.Contig141 | ACSC01000002.1 | 444804-444895   | ATATGATAATAGCACACTTGTTGAAAAATAAGGTCGCAAAGCTTATGAGTCTAAGGGAAAGAATTATTTTCTATGATCGTCAGGTTACCAAA |
| Clostridium botulinum E1<br>str. 'BoNT E Beluga'<br>CLO.Contig141 | ACSC01000002.1 | 3011343-3011261 | CAATTGAATAGGCAAAATTAACGAAAGTTAGTGACGCAAAGCTATAGGGGCTAAAGAGGAATCTATGCCAGCCAGTTGCCGAA          |
| Clostridium botulinum E3<br>str. Alaska E43                       | CP001078.1     | 834905-834987   | CAATTGAATAGGCAAAATTAACGAAAGTTAGTGACGCAAAGCTATAGGGGCTAAAGAGGAATCTATGCCAGCCAGTTGCCGAA          |
| Clostridium botulinum E3<br>str. Alaska E43                       | CP001078.1     | 3080253-3080162 | ATATGACAATAGCACACTTGTTGAAAAATAAGGTCGCAAAGCTTATGAGTCTAAGGGAAAAAATTATTTTCTATGATCGTCAGGTTGCCAAA |
| Clostridium butyricum 5521<br>gcontig_1106103650290               | ABDT01000010.2 | 7909-7989       | TTTCATATTGGGCAAAGCAGTTGAAAAGCTGTGACGCAAAGCTAGAGGGCCTTTCTTATAGAATGGCAGCCAGTTGCATAA            |
| Clostridium butyricum 5521<br>gcontig_1106103650320               | ABDT01000066.2 | 102117-102027   | TAATTGAATACGCAAAGTTAATGAAAGTTAATGACGCAAAGCTATAGGGACTAAGAATTTTATTAAGAATTTATGTCAGCCAGTTGCCGGG  |
| Clostridium butyricum 5521<br>gcontig_1106103650426               | ABDT01000056.2 | 21523-21607     | AAGTATTAATGGCAAAATTAGAGAAATCTAATGACGCAAAGCTATAGGAGCTAAAGTTAAAAAACTATGCTAGCCAGTTGCTAAC        |
| Clostridium butyricum E4<br>str. BoNT E BL5262<br>CLP.Contig62    | ACOM01000004.1 | 102356-102266   | TAATTGAATACGCAAAGTTAATGAAAGTTAATGACGCAAAGCTATAGGGACTAAGAATTTTATTAAGAATTTATGTCAGCCAGTTGCCGGG  |

|                                                                |                |                 |                                                                                             |
|----------------------------------------------------------------|----------------|-----------------|---------------------------------------------------------------------------------------------|
| Clostridium butyricum E4<br>str. BoNT E BL5262<br>CLP.Contig65 | ACOM01000005.1 | 1063771-1063856 | AGTATGTTTTAGCAAAGCTAGAGAAATCTAGCGACGCAAAGCTATAGGGACTAAGGTTGTGAAAACATATGTCAGCCAGTTGCCGAA     |
| Clostridium butyricum E4<br>str. BoNT E BL5262<br>CLP.Contig65 | ACOM01000005.1 | 1474542-1474462 | TTTCATATTGGGCAAAGCAGTTGAAAAGCTGTGACGCAAAGCTAGAGGGCCTTTCTTATAGAATGGCAGCCAGTTGCATAA           |
| Clostridium butyricum E4<br>str. BoNT E BL5262<br>CLP.Contig69 | ACOM01000007.1 | 60367-60451     | AAGTATTAATGGCAAATAGAGAAATCTAATGACGCAAAGCTATAGGAGCTAAAGTTAAAAAACTATGCTAGCCAGTTGCTAAC         |
| Clostridium carboxidivorans<br>P7 CLCAR0098                    | ADEK01000045.1 | 183990-183902   | AATTGAAAAAGGCAAACCCATTGAAAAGTGGGGACGCAAAGCCATGAGTCTAAAGCAATTTTAACTGCTATGACAGTCAGGTTGCCAAT   |
| Clostridium carboxidivorans<br>P7 ctg00030                     | ACV101000170.1 | 5733-5645       | AATTGAAAAAGGCAAACCCATTGAAAAGTGGGGACGCAAAGCCATGAGTCTAAAGCAATTTTAACTGCTATGACAGTCAGGTTGCCAAT   |
| Clostridium cellulovorans<br>743B                              | CP002160.1     | 1445176-1445086 | AAGTGAAAAAGGCAAATCATGGGAAATCATGAGACGCAAAGCCATGGGCCTGTACCACACATTATATGTTGGATGGCAGCCGGTTACCACG |
| Clostridium cellulovorans<br>743B                              | CP002160.1     | 296693-296772   | ATAAATTAAAGGCAAACCTATGCGGGAGCATAGGACGCAAAGCCACGGGTCTGAACATTTAAAGATAGCCGGGTTGCATGT           |
| Clostridium cellulovorans<br>743B DNA                          | BABR01000261.1 | 16724-16645     | ATAAATTAAAGGCAAACCTATGCGGGAGCATAGGACGCAAAGCCACGGGTCTGAACATTTAAAGATAGCCGGGTTGCATGT           |
| Clostridium cellulovorans<br>743B DNA                          | BABR01000333.1 | 1081-1171       | AAGTGAAAAAGGCAAATCATGGGAAATCATGAGACGCAAAGCCATGGGCCTGTACCACACATTATATGTTGGATGGCAGCCGGTTACCACG |
| Clostridium citroniae<br>WAL-17108 cont1.4                     | ADLJ01000004.1 | 176443-176357   | ATGATCGATCAGCAAACTAGCGAAAGCTAGTGACGCAAAGCTACAGGGATTTCCTTTTAAACAGGGATGTCAGCCAGCTGCAGGA       |
| Clostridium difficile<br>002-P50-2011                          | AGAA01000002.1 | 63452-63362     | AAACTAAATAGGCAAATCTAGAGAAATCTAGTGACGCAAAGCTATAGGGACTAAGGTTTGTATACATGAACTATGTCAGCCAGTTGCCAAA |

|                                                                                    |                |               |                                                                                                   |
|------------------------------------------------------------------------------------|----------------|---------------|---------------------------------------------------------------------------------------------------|
| C_difficile002-P50-2011-1.0<br>_Cont1.1                                            |                |               |                                                                                                   |
| Clostridium difficile<br>002-P50-2011<br>C_difficile002-P50-2011-1.0<br>_Cont10.1  | AGAA01000010.1 | 145624-145539 | AATTAAATGAGGCAAACTAGGGAAACCTAGTCACGCAAAGCTATAGGGGCTAAAGTTTAGTAAACCATGCCAGCCAGTTGCCGAA             |
| Clostridium difficile<br>002-P50-2011<br>C_difficile002-P50-2011-1.0<br>_Cont10.1  | AGAA01000010.1 | 108336-108251 | AAAATTAATGGCAAAATTAGGGAAATCTAATGACGCAAACTATAGGGATTAAAGCTTTTAAAGCCATATCAGCCAGTTGCTAAA              |
| Clostridium difficile<br>002-P50-2011<br>C_difficile002-P50-2011-1.0<br>_Cont54.1  | AGAA01000037.1 | 145393-145482 | AAACTAAATAGGCAAACTAGAGAAATTTAGTGACGCAAAGCTATAGGGACTAAGACTTATGAAATGAGTTATGTCAGCCAGTTGCCAAA         |
| Clostridium difficile<br>002-P50-2011<br>C_difficile002-P50-2011-1.0<br>_Cont54.1  | AGAA01000037.1 | 156002-155909 | TTCAGATATAGGCAATATTAGATAAATCTAATGACGCAAACTATAGGGACTAAAATCTTTATGTAATAAAGGTCATGTCAGCCAGTTGCCAAA     |
| Clostridium difficile<br>002-P50-2011<br>C_difficile002-P50-2011-1.0<br>_Cont673.1 | AGAA01000091.1 | 2504-2593     | AAACTAAATCGGCAAACTAGAGAAATTTAGTGACGCAAAGCTATAGGGACTAACGCTTATAAAATAAGTTATGTCAGCCAGTTGCCAAA         |
| Clostridium difficile<br>002-P50-2011<br>C_difficile002-P50-2011-1.0               | AGAA01000092.1 | 239408-239505 | AGACTAAATCGGCAAACTAGAGAAATTTAGTGACGCAAAGCTATAGGGACTAAGACTTATATAAATATCTTATGAGTTATGTCAGCCAGTTGCCAAA |

|                                                                                   |                |             |                                                                                                   |
|-----------------------------------------------------------------------------------|----------------|-------------|---------------------------------------------------------------------------------------------------|
| _Cont673.2                                                                        |                |             |                                                                                                   |
| Clostridium difficile<br>002-P50-2011<br>C_difficile002-P50-2011-1.0<br>_Cont81.1 | AGAA01000044.1 | 38449-38353 | AAACTAAATCGGCAAACTAGAGAAATTTAGTGACGCAAAGCTATAGGGACTAACGCTTATAAAATAAACTATGAGTTATGTCAGCCAGTTGCCAAA  |
| Clostridium difficile<br>002-P50-2011<br>C_difficile002-P50-2011-1.0<br>_Cont87.1 | AGAA01000047.1 | 36787-36691 | AAACTAAATCGGCAAACTAGAGAAATTTAGTGACGCAAAGCTATAGGGACTAACGCTTATAAAATAAACTATGAGTTATGTCAGCCAGTTGCCAAA  |
| Clostridium difficile<br>050-P50-2011<br>C_difficile050-P50-201-1.0_<br>Cont101.1 | AGAB01000041.1 | 38449-38353 | AAACTAAATCGGCAAACTAGAGAAATTTAGTGACGCAAAGCTATAGGGACTAACGCTTATAAAATAAACTATGAGTTATGTCAGCCAGTTGCCAAA  |
| Clostridium difficile<br>050-P50-2011<br>C_difficile050-P50-201-1.0_<br>Cont30.2  | AGAB01000015.1 | 2816-2901   | AATTAAATGAGGCAAACTAGGGAAACCTAGTCACGCAAAGCTATAGGGGCTAAAGTTTAGTAAACCATGCCAGCCAGTTGCCGAA             |
| Clostridium difficile<br>050-P50-2011<br>C_difficile050-P50-201-1.0_<br>Cont30.2  | AGAB01000015.1 | 39977-40062 | AAAATTAAATGGCAAAATTAGGGAAATCTAATGACGCAAAGCTATAGGGATTAAAGCTTTTAAAGCCATATCAGCCAGTTGCTAAA            |
| Clostridium difficile<br>050-P50-2011<br>C_difficile050-P50-201-1.0_<br>Cont347.1 | AGAB01000067.1 | 141-44      | AGACTAAATCGGCAAACTAGAGAAATTTAGTGACGCAAAGCTATAGGGACTAAGACTTATATAAATATCTTATGAGTTATGTCAGCCAGTTGCCAAA |

|                                                                                   |                |                 |                                                                                                  |
|-----------------------------------------------------------------------------------|----------------|-----------------|--------------------------------------------------------------------------------------------------|
| Clostridium difficile<br>050-P50-2011<br>C_difficile050-P50-201-1.0_<br>Cont347.2 | AGAB01000068.1 | 534-445         | AAACTAAATCGGCAAACTAGAGAAATTTAGTGACGCAAAGCTATAGGGACTAACGCTTATAAAATAAGTTATGTCAGCCAGTTGCCAAA        |
| Clostridium difficile<br>050-P50-2011<br>C_difficile050-P50-201-1.0_<br>Cont396.2 | AGAB01000070.1 | 212-305         | TTCAGATATAGGCAATATTAGATAAATCTAATGACGCAAACTATAGGGACTAAAATCTTTATGTAATAAAGGTCATGTCAGCCAGTTGCCAAA    |
| Clostridium difficile<br>050-P50-2011<br>C_difficile050-P50-201-1.0_<br>Cont396.2 | AGAB01000070.1 | 10821-10732     | AAACTAAATAGGCAAACTAGAGAAATTTAGTGACGCAAAGCTATAGGGACTAAGACTTATGAAATGAGTTATGTCAGCCAGTTGCCAAA        |
| Clostridium difficile<br>050-P50-2011<br>C_difficile050-P50-201-1.0_<br>Cont43.1  | AGAB01000022.1 | 36787-36691     | AAACTAAATCGGCAAACTAGAGAAATTTAGTGACGCAAAGCTATAGGGACTAACGCTTATAAAATAAACTATGAGTTATGTCAGCCAGTTGCCAAA |
| Clostridium difficile<br>050-P50-2011<br>C_difficile050-P50-201-1.0_<br>Cont81.1  | AGAB01000036.1 | 143786-143876   | AAACTAAATAGGCAAATCTAGAGAAATCTAGTGACGCAAAGCTATAGGGACTAAGGTTTGTATACATGAACTATGTCAGCCAGTTGCCAAA      |
| Clostridium difficile 630<br>complete genome                                      | AM180355.1     | 3936239-3936335 | AAACTAAATCGGCAAACTAGAGAAATTTAGTGACGCAAAGCTATAGGGACTAACGCTTATAAAATAAACTATGAGTTATGTCAGCCAGTTGCCAAA |
| Clostridium difficile 630<br>complete genome                                      | AM180355.1     | 1142665-1142570 | AAACTAAATCGGCAAACTAGAGAAAATTAGTGACGCAAAGCTATAGGGACTAAGATTTATAAAATTCTTATAAATTATGCCAGCCAGTTGCCAAA  |
| Clostridium difficile 630                                                         | AM180355.1     | 3303460-3303375 | AATTAAATGAGGCAAACTAGGGAAACCTAGTCACGCAAAGCTATAGGGGCTAAAGTTTAGTAAACCATGCCAGCCAGTTGCCGAA            |

|                                              |                |                 |                                                                                                   |
|----------------------------------------------|----------------|-----------------|---------------------------------------------------------------------------------------------------|
| complete genome                              |                |                 |                                                                                                   |
| Clostridium difficile 630<br>complete genome | AM180355.1     | 2285922-2286011 | AAACTAAATAGGCAAACTAGAGAAATTTAGTGACGCAAAGCTATAGGGACTAAGACTTATGAAATGAGTTATGTCAGCCAGTTGCCAAA         |
| Clostridium difficile 630<br>complete genome | AM180355.1     | 308777-308867   | AAACTAAATAGGCAAATCTAGAGAAATCTAGTGACGCAAAGCTATAGGGACTAAGGTTTATATACATAAACTATGTCAGCCAGTTGCCAAA       |
| Clostridium difficile 630<br>complete genome | AM180355.1     | 2671808-2671897 | AAACTAAATCGGCAAACTAGAGAAATTTAGTGACGCAAAGCTATAGGGACTAACGCTTATAAAATAAGTTATGTCAGCCAGTTGCCAAA         |
| Clostridium difficile 630<br>complete genome | AM180355.1     | 2297491-2297588 | AAACTAAATCGGCAAACTAGAGAAATTTAGTGACGCAAAGCTATAGGGACTAAGACTTATATAAATATCTTATGAGTTATGTCAGCCAGTTGCCAAA |
| Clostridium difficile 630<br>complete genome | AM180355.1     | 3379980-3380075 | AAACTAAATCGGCAAACTAGAGAAAATTTAGTGACGCAAAGCTATAGGGACTAAGATTTATAAAATCTTATAAATTATGCCAGCCAGTTGCCAAA   |
| Clostridium difficile 630<br>complete genome | AM180355.1     | 2296528-2296435 | TTCAGATATAGGCAATATTAGATAAATCTAATGACGCAAACTATAGGGACTAAAATCTTTATGTAATAAAGGTCATGTCAGCCAGTTGCCAAA     |
| Clostridium difficile 630<br>complete genome | AM180355.1     | 1653917-1653821 | AAACTAAATCGGCAAACTAGAGAAATTTAGTGACGCAAAGCTATAGGGACTAACGCTTATAAAATAAACTATGAGTTATGTCAGCCAGTTGCCAAA  |
| Clostridium difficile 630<br>complete genome | AM180355.1     | 2907225-2907322 | AAACTAAATCGGCAAACTAGAGAAATCTAGTGACGCAAAGCTATAGGGACTAAGACTTATATAAATATCTTATGAGTTATGTCAGCCAGTTGCCAAA |
| Clostridium difficile 630<br>complete genome | AM180355.1     | 3266964-3266879 | AAAATTAATGGCAAAATTAGGGAAATCTAATGACGCAAACTATAGGGATTAAAGCTTTTAAAGCCATATCAGCCAGTTGCTAAA              |
| Clostridium difficile 6407<br>contig_1379    | ADEH01001379.1 | 80-1            | TTCAGATATAGGCAATATTAGATAAATCTAATGACGCAAACTATAGGGACTAAAATCTTTATGTAATAAAGGTCATGTC                   |
| Clostridium difficile 6407<br>contig_1494    | ADEH01001494.1 | 16-106          | AAACTAAATAGGCAAATCTAGAGAAATCTAGTGACGCAAAGCTATAGGGACTAAGGTTTGTATACACAAGCTATGTCAGCCAGTTGCCAAA       |
| Clostridium difficile 6407<br>contig_1836    | ADEH01001836.1 | 435-350         | AATTAAATGAGGCAAACTAGGGAAACCTAGTCACGCAAAGCTATAGGGGCTAAAGTTTAGTAAACCATGCCAGCCAGTTGCCGAA             |



|                                           |                |             |                                                                                                   |
|-------------------------------------------|----------------|-------------|---------------------------------------------------------------------------------------------------|
| Clostridium difficile 6407<br>contig_3336 | ADEH01003336.1 | 1335-1424   | AAACTAAATAGGCAAACTAGAGAAATTTAGTGACGCAAAGCTATAGGGACTAAGACTTATGAAATGAGTTATGTCAGCCAGTTGCCAAA         |
| Clostridium difficile 6466<br>contig_117  | ADDE01000117.1 | 10523-10610 | AAACTTAATAGGCAAACCTAGAGAAATCTAGGGACGCAAAGCTATAGGGGTTAAGGTCTTAAAAAGATTATGCCTGCCAGTTACTAAA          |
| Clostridium difficile 6466<br>contig_222  | ADDE01000222.1 | 24-113      | AAACTAAATAGGCAAACTAGAGAAATTTAGTGACGCAAAGCTATAGGGACTAAGACTTATGAAATGAGTTATGTCAGCCAGTTGCCAAA         |
| Clostridium difficile 6466<br>contig_319  | ADDE01000318.1 | 32015-32100 | AATTAAATGAGGCAAACTAGGGAAACCTAGTCACGCAAAGCTATAGGGGCTAAAGTTTAGTAAACCATGCCAGCCAGTTGCCGAA             |
| Clostridium difficile 6466<br>contig_321  | ADDE01000320.1 | 2506-2599   | TTCATATATAGGCAATATTAGATAAATCTAATGACGCAAACCTATAGGGACTAAAATCTTTATATAATAAAGGTCATGTCAGCCAGTTGCCAAA    |
| Clostridium difficile 6466<br>contig_356  | ADDE01000355.1 | 2030-2119   | AAACTAAATCGGCAAACTAGAGAAATTTAGTGACGCAAAGCTATAGGGACTAACGCTTATAAAATAAGTTATGTCAGCCAGTTGCCAAA         |
| Clostridium difficile 6466<br>contig_89   | ADDE01000089.1 | 21755-21851 | AAACTAAATCGGCAAACTAGAGAAATTTAGTGACGCAAAGCTATAGGGACTAACGCTTATAAAATAAAATATGAGTTATGTCAGCCAGTTGCCAAA  |
| Clostridium difficile 6503<br>contig_1    | ADEI01000001.1 | 38408-38312 | AAACTAAATCGGCAAACTAGAGAAATTTAGTGACGCAAAGCTATAGGGACTAACGCTTATAAAATAAACTATGAGTTATGTCAGCCAGTTGCCAAA  |
| Clostridium difficile 6503<br>contig_15   | ADEI01000015.1 | 65161-65064 | AGACTAAATCGGCAAACTAGAGAAATTTAGTGACGCAAAGCTATAGGGACTAAGACTTATATAAATATCTTATGAGTTATGTCAGCCAGTTGCCAAA |
| Clostridium difficile 6503<br>contig_18   | ADEI01000018.1 | 420-513     | TTCAGATATAGGCAATATTAGATAAATCTAATGACGCAAACCTATAGGGACTAAAATCTTTATGTAATAAAGGTCATGTCAGCCAGTTGCCAAA    |
| Clostridium difficile 6503<br>contig_30   | ADEI01000030.1 | 31786-31876 | AAACTAAATAGGCAAACTAGAGAAATCTAGCGACGCAAAGCTATAGGAGCTAAGGTTTGTATATACGAACTATGCTAGCCAGTTGCCAAA        |
| Clostridium difficile 6503<br>contig_43   | ADEI01000043.1 | 91888-91799 | AAACTAAATCGGCAAACTAGAGAAATTTAGTGACGCAAAGCTATAGGGACTAACGCTTATAAAATAAGTTATGTCAGCCAGTTGCCAAA         |
| Clostridium difficile 6503                | ADEI01000047.1 | 77878-77781 | AAACTAAATCGGCAAACTAGAGAAATCTAGCGACGCAAAGCTATAGGGACTAAGACTTATATAAATATATTATGAGTTATGTCAGCCAGTTGCCAAA |

|                                           |                |               |                                                                                                   |
|-------------------------------------------|----------------|---------------|---------------------------------------------------------------------------------------------------|
| contig_47                                 |                |               |                                                                                                   |
| Clostridium difficile 6503<br>contig_66   | ADEI01000066.1 | 6535-6438     | AAACTAAATCGGCAAACTAGAGAAATTTAGTGACGCAAAGCTATAGGGACTAAGACTTATATAAATATCTTATGAGTTATGTCAGCCAGTTGCCAAA |
| Clostridium difficile 6503<br>contig_69   | ADEI01000069.1 | 37387-37472   | AAAATTAAATGGCAAAATTAGGGAAATCTAATGACGCAAACTATAGGGATTAAAGCTTTTAAAGCCATATCAGCCAGTTGCTAAA             |
| Clostridium difficile 6503<br>contig_69   | ADEI01000069.1 | 89-174        | AATTAAATGAGGCAAACTAGGGAAACCTAGTCACGCAAAGCTATAGGGGCTAAAGTTTAGTAAACCATGCCAGCCAGTTGCCGAA             |
| Clostridium difficile 6503<br>contig_89   | ADEI01000089.1 | 54279-54183   | AAACTAAATCGGCAAACTAGAGAAATTTAGTGACGCAAAGCTATAGGGACTAACGCTTATAAAATAAACTATGAGTTATGTCAGCCAGTTGCCAAA  |
| Clostridium difficile 6503<br>contig_99   | ADEI01000099.1 | 174961-175050 | AAACTAAATAGGCAAACTAGAGAAATTTAGTGACGCAAAGCTATAGGGACTAAGACTTATGAAATGAGTTATGTCAGCCAGTTGCCAAA         |
| Clostridium difficile 6534<br>contig_1131 | ADEJ01001131.1 | 177-81        | AAACTAAATCGGCAAACTAGAGAAATTTAGTGACGCAAAGCTATAGGGACTAACGCTTATAAAATAAACTATGAGTTATGTCAGCCAGTTGCCAAA  |
| Clostridium difficile 6534<br>contig_1175 | ADEJ01001175.1 | 145-56        | AAACTAAATCGGCAAACTAGAGAAATTTAGTGACGCAAAGCTATAGGGACTAACGCTTATAAAATAAGTTATGTCAGCCAGTTGCCAAA         |
| Clostridium difficile 6534<br>contig_235  | ADEJ01000235.1 | 251-340       | AAACTAAATAGGCAAACTAGAGAAATTTAGTGACGCAAAGCTATAGGGACTAAGACTTATGAAATGAGTTATGTCAGCCAGTTGCCAAA         |
| Clostridium difficile 6534<br>contig_281  | ADEJ01000281.1 | 143-47        | AAACTAAATCGGCAAACTAGAGAAATTTAGTGACGCAAAGCTATAGGGACTAACGCTTATAAAATAAACTATGAGTTATGTCAGCCAGTTGACCAA  |
| Clostridium difficile 6534<br>contig_458  | ADEJ01000458.1 | 9065-8980     | AAAATTAAATGGCAAAATTAGGGAAATCTAATGACGCAAACTATAGGGATTAAAGCTTTTAAAGCCATATCAGCCAGTTGCTAAA             |
| Clostridium difficile 6534<br>contig_487  | ADEJ01000487.1 | 23911-24008   | AAACTAAAACGGCAAACTAGAGAAATTTAGTGACGCAAAGCTATAGGGACTAAGACTTATATAAATATCTTATGAGTTATGTTAGCCAGTTGCCAAA |
| Clostridium difficile 6534<br>contig_679  | ADEJ01000679.1 | 216-309       | TTCAGATATAGGCAATATTAGATAAATCTAATGACGCAAACTATAGGGACTAAAATCTTTATGTAATAAAGGTCATGTCAGCCAGTTGCCAAA     |

|                                                                                   |                |               |                                                                                                   |
|-----------------------------------------------------------------------------------|----------------|---------------|---------------------------------------------------------------------------------------------------|
| Clostridium difficile 6534<br>contig_907                                          | ADEJ01000907.1 | 7812-7738     | GCAAAACTAGGGAAACCTAGTCACGCAAAGCTATAGGGGCTAAAGTTTAGTAAACCATGCCAGCCAGTTGCCGAA                       |
| Clostridium difficile 6534<br>contig_922                                          | ADEJ01000922.1 | 4100-4190     | AAACTAAATAGGCAAATCTAGAGAAATCTAGTGACGCAAAGCTATAGGGACTAAGGTTTATATACATAAACTATGTCAGCCAGTTGCCAAA       |
| Clostridium difficile<br>70-100-2010<br>C_difficile70-100-2010-1.0_<br>Cont1012.4 | AGAC01000130.1 | 4271-4360     | AAACTAAATCGGCAAACTAGAGAAATTTAGTGACGCAAAGCTATAGGGACTAACGCTTATAAAATAAGTTATGTCAGCCAGTTGCCAAA         |
| Clostridium difficile<br>70-100-2010<br>C_difficile70-100-2010-1.0_<br>Cont1012.5 | AGAC01000131.1 | 234656-234753 | AAACTAAATCGGCAAACTAGAGAAATCTAGTGACGCAAAGCTATAGAGACTAAGACTTATATAAATATCTTATGAGTTATGTCAGCCAGTTGCCAAA |
| Clostridium difficile<br>70-100-2010<br>C_difficile70-100-2010-1.0_<br>Cont191.2  | AGAC01000081.1 | 8105-8009     | AAACTAAATCGGCAAACTAGAGAAATTTAGTGACGCAAAGCTATAGGGACTAACGCTTATAAAATAAACTATGAGTTATGTCAGCCAGTTGCCAAA  |
| Clostridium difficile<br>70-100-2010<br>C_difficile70-100-2010-1.0_<br>Cont25.3   | AGAC01000021.1 | 504-407       | AAACTAAATCGGCAAACTAGAGAAATTTAGTGACGCAAAGCTATAGGGACTAAGACTTATATAAATATCTTATGAGTTATGTCAGCCAGTTGCCAAA |
| Clostridium difficile<br>70-100-2010<br>C_difficile70-100-2010-1.0_<br>Cont25.3   | AGAC01000021.1 | 1484-1577     | TTCAGATATAGGCAATATTAGATAAATCTAATGACGCAAACTATAGGGACTAAAATCTTTATGTAATAAAGGTCATGTCAGCCAGTTGCCAAA     |
| Clostridium difficile                                                             | AGAC01000021.1 | 12121-12032   | AAACTAAATCGGCAAACTAGAGAAATTTAGTGACGCAAAGCTATAGGGACTAAGACTTATGAAATGAGTTATGTCAGCCAGTTGCCAAA         |

|                                                                                 |                |               |                                                                                                   |
|---------------------------------------------------------------------------------|----------------|---------------|---------------------------------------------------------------------------------------------------|
| 70-100-2010<br>C_difficile70-100-2010-1.0_<br>Cont25.3                          |                |               |                                                                                                   |
| Clostridium difficile<br>70-100-2010<br>C_difficile70-100-2010-1.0_<br>Cont35.1 | AGAC01000033.1 | 64556-64466   | AAACTAAATAGGCAAATCTAGAGAAATCTAGTGACGCAAAGCTATAGGGACTAAGGTTTATATACATAAACTATGTCAGCCAGTTGCCAAA       |
| Clostridium difficile<br>70-100-2010<br>C_difficile70-100-2010-1.0_<br>Cont38.1 | AGAC01000036.1 | 16390-16475   | AATTAAATGAGGCAAACTAGGGAAACCTAGTCACGCAAAGCTATAGGGGCTAAAGTTTAGTAAACCATGCCAGCCAGTTGCCGAA             |
| Clostridium difficile<br>70-100-2010<br>C_difficile70-100-2010-1.0_<br>Cont38.1 | AGAC01000036.1 | 52929-53014   | AAAATTAAATGGCAAAATTAGGGAAATCTAATGACGCAAACTATAGGGATTAAAGCTTTTAAAGCCATATCAGCCAGTTGCTAAA             |
| Clostridium difficile<br>70-100-2010<br>C_difficile70-100-2010-1.0_<br>Cont44.1 | AGAC01000040.1 | 22320-22416   | AAACTAAATCGGCAAACTAGAGAAATTTAGTGACGCAAAGCTATAGGGACTAACGCTTATAAAATAAACTATGAGTTATGTCAGCCAGTTGCCAAA  |
| Clostridium difficile ATCC<br>43255 contig00008_2                               | ABKJ02000008.1 | 57627-57717   | AAACTAAATAGGCAAATCTAGAGAAATCTAGTGACGCAAAGCTATAGGGACTAAGGTTTGTATACACAAGCTATGTAAGCCAGTTGCCAAA       |
| Clostridium difficile ATCC<br>43255 contig00008_2                               | ABKJ02000008.1 | 241-144       | AAACTAAATCGGCAAACTAGAGAAATTTAGTGACGCAAAGCTATAGGGACTAAGACTTATATAAATATCTTATGAGTTATGTTAGCCAGTTGCCAAA |
| Clostridium difficile ATCC<br>43255 contig00016_2                               | ABKJ02000016.1 | 132491-132395 | AAACTAAATCGGCAAACTAGAGAAATTTAGTGACGCAAAGCTATAGGGACTAACGCTTATAAAATAAACTATGAGTTATGTCAGCCAGTTGCCAAA  |

|                                                   |                |                 |                                                                                                   |
|---------------------------------------------------|----------------|-----------------|---------------------------------------------------------------------------------------------------|
| Clostridium difficile ATCC<br>43255 contig00018_2 | ABKJ02000018.1 | 443359-443266   | TTCAGATATAGGCAATATTAGATAAATCTAATGACGCAAACTATAGGGACTAAAATCTTTATGTAATAAAGGTCATGTCAGCCAGTTGCCAAA     |
| Clostridium difficile ATCC<br>43255 contig00018_2 | ABKJ02000018.1 | 812858-812947   | AAACTAAATCGGCAAACTAGAGAAATTTAGTGACGCAAAGCTATAGGGACTAACGCTTATAAAATAAGTTATGTCAGCCAGTTGCCAAA         |
| Clostridium difficile ATCC<br>43255 contig00018_2 | ABKJ02000018.1 | 444323-444420   | AAACTAAATCGGCAAACTAGAGAAATTTAGTGACGCAAAGCTATAGGGACTAAGACTTATATAAATATCTTATGAGTTATGTCAGCCAGTTGCCAAA |
| Clostridium difficile ATCC<br>43255 contig00018_2 | ABKJ02000018.1 | 1047597-1047694 | AAACTAAATCGGCAAACTAGAGAAATCTAGTGACGCAAAGCTATAGGGACTAAGACTTATATAAATATCTTATGAGTTATGTTAGCCAGTTGCCAAA |
| Clostridium difficile ATCC<br>43255 contig00018_2 | ABKJ02000018.1 | 432755-432844   | AAACTAAATAGGCAAACTAGAGAAATTTAGTGACGCAAAGCTATAGGGACTAAGACTTATGAAATGAGTTATGTCAGCCAGTTGCCAAA         |
| Clostridium difficile ATCC<br>43255 contig00019_2 | ABKJ02000019.1 | 654797-654894   | AAACTAAATCGGCAAACTAGAGAAATTTAGTGACGCAAAGCTATAGGGACTAAGACTTATATAAATATCTTATGAGTTATGTCAGCCAGTTGCCAAA |
| Clostridium difficile ATCC<br>43255 contig00019_2 | ABKJ02000019.1 | 145198-145113   | AATTAAATGAGGCAAACTAGGGAAACCTAGTCACGCAAAGCTATAGGGGCTAAAGTTTAGTAAACCATGCCAGCCAGTTGCCGAA             |
| Clostridium difficile ATCC<br>43255 contig00019_2 | ABKJ02000019.1 | 108651-108566   | AAAATTAATGGCAAAATTAGGGAAATCTAATGACGCAAACTATAGGGATTAAAGCTTTTAAAGCCATATCAGCCAGTTGCTAAA              |
| Clostridium difficile ATCC<br>43255 contig00020_2 | ABKJ02000020.1 | 105117-105213   | AAACTAAATCGGCAAACTAGAGAAATTTAGTGACGCAAAGCTATAGGGACTAACGCTTATAAAATAAACTATGAGTTATGTCAGCCAGTTGCCAAA  |
| Clostridium difficile<br>bacteriophage phi CD119  | AY855346.1     | 29246-29151     | AAACTAAATCGGCAAACTAGAGAAATTTAGTGACGCAAAGCTATAGGGACTAAGATTATATAAAATCTTATAAATTATGCCAGCCAGTTGCCAAA   |
| Clostridium difficile BI1<br>chromosome           | FN668941.1     | 1522481-1522385 | AAACTAAATCGGCAAACTAGAGAAATTTAGTGACGCAAAGCTATAGGGACTAACGCTTATAAAATAAACTATGAGTTATGTCAGCCAGTTGCCAAA  |
| Clostridium difficile BI1<br>chromosome           | FN668941.1     | 2151966-2152055 | AAACTAAATAGGCAAACTAGAGAAATTTAGTGACGCAAAGCTATAGGGACTAAGACTTATGAAATGAGTTATGTCAGCCAGTTGCCAAA         |
| Clostridium difficile BI1                         | FN668941.1     | 2165422-2165519 | AAACTAAATCGGCAAACTAGAGAAATTTAGTGACGCAAAGCTATAGGGACTAAGACTTATATAAATATCTTATGAGTTATGTCAGCCAGTTGCCAAA |

|                                      |            |                 |                                                                                                   |
|--------------------------------------|------------|-----------------|---------------------------------------------------------------------------------------------------|
| chromosome                           |            |                 |                                                                                                   |
| Clostridium difficile BI1 chromosome | FN668941.1 | 3758256-3758352 | AAACTAAATCGGCAAACTAGAGAAATTTAGTGACGCAAAGCTATAGGGACTAACGCTTATAAAATAAACTATGAGTTATGTCAGCCAGTTGCCAAA  |
| Clostridium difficile BI1 chromosome | FN668941.1 | 3144610-3144525 | AATTAAATGAGGCAAACTAGGGAAACCTAGTCACGCAAAGCTATAGGGGCTAAAGTTTAGTAAACCATGCCAGCCAGTTGCCGAA             |
| Clostridium difficile BI1 chromosome | FN668941.1 | 2164456-2164363 | TTCAGATATAGGCAATATTAGATAAATCTAATGACGCAAACTATAGGGACTAAAATCTTTATGTAATAAAGGTCATGTCAGCCAGTTGCCAAA     |
| Clostridium difficile BI1 chromosome | FN668941.1 | 2510128-2510217 | AAACTAAATCGGCAAACTAGAGAAATTTAGTGACGCAAAGCTATAGGGACTAACGCTTATAAAATAAGTTATGTCAGCCAGTTGCCAAA         |
| Clostridium difficile BI1 chromosome | FN668941.1 | 320244-320334   | AAACTAAATAGGCAAATCTAGAGAAATCTAGTGACGCAAAGCTATAGGGGCTAAGGTTTGTATACACAACTATGTCAGCCAGTTGCCAAA        |
| Clostridium difficile BI1 chromosome | FN668941.1 | 3104136-3104051 | AAAATTAAATGGCAAAATTAGGGAAATCTAATGACGCAAACTATAGGGATTAAAGCTTTTAAAGCCATATCAGCCAGTTGCTAAA             |
| Clostridium difficile BI9 chromosome | FN668944.1 | 2629381-2629478 | AAACTAAATCGGCAAACTAGAGAAATCTAGTGACGCAAAGCTATAGGGACTAAGACTTATATAAATATCTTATGAGTTATGTTAGCCAGTTGCCAAA |
| Clostridium difficile BI9 chromosome | FN668944.1 | 3019045-3018960 | AATTAAATGAGGCAAACTAGGGAAACCTAGTCACGCAAAGCTATAGGGGCTAAAGTTTAGTAAACCATGCCAGCCAGTTGCCGAA             |
| Clostridium difficile BI9 chromosome | FN668944.1 | 3608604-3608700 | AAACTAAATCGGCAAACTAGAGAAATTTAGTGACGCAAAGCTATAGGGACTAACGCTTATAAAATAAACTATGAGTTATGTCAGCCAGTTGCCAAA  |
| Clostridium difficile BI9 chromosome | FN668944.1 | 2044462-2044369 | TTCAGATATAGGCAATATTAGATAAATCTAATGACGCAAACTATAGGGACTAAAATCTTTATGTAATAAAGGTCATGTCAGCCAGTTGCCAAA     |
| Clostridium difficile BI9 chromosome | FN668944.1 | 2982499-2982414 | AAAATTAAATGGCAAAATTAGGGAAATCTAATGACGCAAACTATAGGGATTAAAGCTTTTAAAGCCATATCAGCCAGTTGCTAAA             |
| Clostridium difficile BI9 chromosome | FN668944.1 | 2045442-2045539 | AAACTAAATCGGCAAACTAGAGAAATTTAGTGACGCAAAGCTATAGGGACTAAGACTTATATAAATATCTTATGAGTTATGTCAGCCAGTTGCCAAA |

|                                             |            |                 |                                                                                                   |
|---------------------------------------------|------------|-----------------|---------------------------------------------------------------------------------------------------|
| Clostridium difficile BI9 chromosome        | FN668944.1 | 1429802-1429706 | AAACTAAATCGGCAAACTAGAGAAATTTAGTGACGCAAAGCTATAGGGACTAACGCTTATAAAATAAACTATGAGTTATGTCAGCCAGTTGCCAAA  |
| Clostridium difficile BI9 chromosome        | FN668944.1 | 2033855-2033944 | AAACTAAATAGGCAAACTAGAGAAATTTAGTGACGCAAAGCTATAGGGACTAAGACTTATGAAATGAGTTATGTCAGCCAGTTGCCAAA         |
| Clostridium difficile BI9 chromosome        | FN668944.1 | 270216-270306   | AAACTAAATAGGCAAATCTAGAGAAATCTAGTGACGCAAAGCTATAGGGACTAAGGTTTATATACATGAACTATGTCAGCCAGTTGCCAAA       |
| Clostridium difficile BI9 chromosome        | FN668944.1 | 2390875-2390964 | AAACTAAATCGGCAAACTAGAGAAATTTAGTGACGCAAAGCTATAGGGACTAACGCTTATAAAATAAGTTATGTCAGCCAGTTGCCAAA         |
| Clostridium difficile CD196 complete genome | FN538970.1 | 3750238-3750334 | AAACTAAATCGGCAAACTAGAGAAATTTAGTGACGCAAAGCTATAGGGACTAACGCTTATAAAATAAACTATGAGTTATGTCAGCCAGTTGCCAAA  |
| Clostridium difficile CD196 complete genome | FN538970.1 | 310584-310674   | AAACTAAATAGGCAAATCTAGAGAAATCTAGTGACGCAAAGCTATAGGGGCTAAGGTTTGTATACACAACTATGTCAGCCAGTTGCCAAA        |
| Clostridium difficile CD196 complete genome | FN538970.1 | 2143958-2144047 | AAACTAAATAGGCAAACTAGAGAAATTTAGTGACGCAAAGCTATAGGGACTAAGACTTATGAAATGAGTTATGTCAGCCAGTTGCCAAA         |
| Clostridium difficile CD196 complete genome | FN538970.1 | 2157412-2157509 | AAACTAAATCGGCAAACTAGAGAAATTTAGTGACGCAAAGCTATAGGGACTAAGACTTATATAAATATCTTATGAGTTATGTCAGCCAGTTGCCAAA |
| Clostridium difficile CD196 complete genome | FN538970.1 | 2156446-2156353 | TTCAGATATAGGCAATATTAGATAAATCTAATGACGCAAACTATAGGGACTAAAATCTTTATGTAATAAAGGTCATGTCAGCCAGTTGCCAAA     |
| Clostridium difficile CD196 complete genome | FN538970.1 | 1512707-1512611 | AAACTAAATCGGCAAACTAGAGAAATTTAGTGACGCAAAGCTATAGGGACTAACGCTTATAAAATAAACTATGAGTTATGTCAGCCAGTTGCCAAA  |
| Clostridium difficile CD196 complete genome | FN538970.1 | 2502116-2502205 | AAACTAAATCGGCAAACTAGAGAAATTTAGTGACGCAAAGCTATAGGGACTAACGCTTATAAAATAAGTTATGTCAGCCAGTTGCCAAA         |
| Clostridium difficile CD196 complete genome | FN538970.1 | 3136658-3136573 | AATTAAATGAGGCAAACTAGGGAAACCTAGTCACGCAAAGCTATAGGGGCTAAAGTTTAGTAAACCATGCCAGCCAGTTGCCGAA             |
| Clostridium difficile CD196 complete genome | FN538970.1 | 3096184-3096099 | AAAATTAAATGGCAAAATTAGGGAAATCTAATGACGCAAACTATAGGGATTAAAGCTTTTAAAGCCATATCAGCCAGTTGCTAAA             |

|                                                   |                |                 |                                                                                                   |
|---------------------------------------------------|----------------|-----------------|---------------------------------------------------------------------------------------------------|
| complete genome                                   |                |                 |                                                                                                   |
| Clostridium difficile CIP<br>107932 contig00005_2 | ABKK02000005.1 | 159700-159790   | AAACTAAATAGGCAAATCTAGAGAAATCTAGTGACGCAAAGCTATAGGGGCTAAGGTTTGTATACACAACTATGTCAGCCAGTTGCCAAA        |
| Clostridium difficile CIP<br>107932 contig00021_2 | ABKK02000021.1 | 218694-218598   | AAACTAAATCGGCAAACTAGAGAAATTTAGTGACGCAAAGCTATAGGGACTAACGCTTATAAAATAAACTATGAGTTATGTCAGCCAGTTGCCAAA  |
| Clostridium difficile CIP<br>107932 contig00025_2 | ABKK02000025.1 | 226346-226435   | AAACTAAATAGGCAAACTAGAGAAATTTAGTGACGCAAAGCTATAGGGACTAAGACTTATGAAATGAGTTATGTCAGCCAGTTGCCAAA         |
| Clostridium difficile CIP<br>107932 contig00026_2 | ABKK02000026.1 | 10476-10383     | TTCAGATATAGGCAATATTAGATAAATCTAATGACGCAAACTATAGGGACTAAAATCTTTATGTAATAAAGGTCATGTCAGCCAGTTGCCAAA     |
| Clostridium difficile CIP<br>107932 contig00026_2 | ABKK02000026.1 | 11442-11539     | AAACTAAATCGGCAAACTAGAGAAATTTAGTGACGCAAAGCTATAGGGACTAAGACTTATATAAATATCTTATGAGTTATGTCAGCCAGTTGCCAAA |
| Clostridium difficile CIP<br>107932 contig00027_2 | ABKK02000027.1 | 118-207         | AAACTAAATCGGCAAACTAGAGAAATTTAGTGACGCAAAGCTATAGGGACTAACGCTTATAAAATAAGTTATGTCAGCCAGTTGCCAAA         |
| Clostridium difficile CIP<br>107932 contig00030_2 | ABKK02000030.1 | 108717-108632   | AAAATTAATGGCAAAATTAGGGAAATCTAATGACGCAAACTATAGGGATTAAAGCTTTTAAAGCCATATCAGCCAGTTGCTAAA              |
| Clostridium difficile CIP<br>107932 contig00032_2 | ABKK02000032.1 | 5335-5250       | AATTAAATGAGGCAAACTAGGGAAACCTAGTCACGCAAAGCTATAGGGGCTAAAGTTTAGTAAACCATGCCAGCCAGTTGCCGAA             |
| Clostridium difficile CIP<br>107932 contig00036_2 | ABKK02000036.1 | 22585-22681     | AAACTAAATCGGCAAACTAGAGAAATTTAGTGACGCAAAGCTATAGGGACTAACGCTTATAAAATAAACTATGAGTTATGTCAGCCAGTTGCCAAA  |
| Clostridium difficile<br>complete genome          | FN665653.1     | 3160669-3160584 | AATTAAATGAGGCAAACTAGGGAAACCTAGTCACGCAAAGCTATAGGGGCTAAAGTTTAGTAAACCATGCCAGCCAGTTGCCGAA             |
| Clostridium difficile<br>complete genome          | FN665653.1     | 2145097-2145004 | TTCATATATAGGCAATATTAGATAAATCTAATGACGCAAACTATAGGGACTAAAATCTTTATATAATAAAGGTCATGTCAGCCAGTTGCCAAA     |
| Clostridium difficile<br>complete genome          | FN665653.1     | 2134493-2134582 | AAACTAAATAGGCAAACTAGAGAAATTTAGTGACGCAAAGCTATAGGGACTAAGACTTATGAAATGAGTTATGTCAGCCAGTTGCCAAA         |



|                                |                         |                 |                                                                                                   |
|--------------------------------|-------------------------|-----------------|---------------------------------------------------------------------------------------------------|
| Clostridium<br>complete genome | difficile<br>FN665653.1 | 3343645-3343732 | AAACTTAATAGGCAAACCTAGAGAAATCTAGGGACGCAAAGCTATAGGGGTTAAGGTCTTAAAAAGATTATGCCTGCCAGTTACTAAA          |
| Clostridium<br>complete genome | difficile<br>FN665653.1 | 2533656-2533745 | AAACTAAATCGGCAAACTAGAGAAATTTAGTGACGCAAAGCTATAGGGACTAACGCTTATAAAATAAGTTATGTCAGCCAGTTGCCAAA         |
| Clostridium<br>complete genome | difficile<br>FN665653.1 | 3731801-3731897 | AAACTAAATCGGCAAACTAGAGAAATTTAGTGACGCAAAGCTATAGGGACTAACGCTTATAAAATAAAATATGAGTTATGTCAGCCAGTTGCCAAA  |
| Clostridium<br>complete genome | difficile<br>FN665652.1 | 1548193-1548097 | AAACTAAATCGGCAAACTAGAGAAATTTAGTGACGCAAAGCTATAGGGACTAACGCTTATAAAATAAACTATGAGTTATGTCAGCCAGTTGCCAAA  |
| Clostridium<br>complete genome | difficile<br>FN665652.1 | 2198836-2198925 | AAACTAAATAGGCAAACTAGAGAAATTTAGTGACGCAAAGCTATAGGGACTAAGACTTATGAAATGAGTTATGTCAGCCAGTTGCCAAA         |
| Clostridium<br>complete genome | difficile<br>FN665652.1 | 3198352-3198267 | AATTAAATGAGGCAAACTAGGGAAACCTAGTCACGCAAAGCTATAGGGGCTAAAGTTTAGTAAACCATGCCAGCCAGTTGCCGAA             |
| Clostridium<br>complete genome | difficile<br>FN665652.1 | 2209445-2209352 | TTCAGATATAGGCAATATTAGATAAATCTAATGACGCAAACTATAGGGACTAAAATCTTTATGTAATAAAGGTCATGTCAGCCAGTTGCCAAA     |
| Clostridium<br>complete genome | difficile<br>FN665652.1 | 284001-284091   | AAACTAAATAGGCAAATCTAGAGAAATCTAGTGACGCAAAGCTATAGGGACTAAGGTTTGTATACATGAACATATGTCAGCCAGTTGCCAAA      |
| Clostridium<br>complete genome | difficile<br>FN665652.1 | 2560642-2560731 | AAACTAAATCGGCAAACTAGAGAAATTTAGTGACGCAAAGCTATAGGGACTAACGCTTATAAAATAAGTTATGTCAGCCAGTTGCCAAA         |
| Clostridium<br>complete genome | difficile<br>FN665652.1 | 2800330-2800427 | AGACTAAATCGGCAAACTAGAGAAATTTAGTGACGCAAAGCTATAGGGACTAAGACTTATATAAATATCTTATGAGTTATGTCAGCCAGTTGCCAAA |
| Clostridium<br>complete genome | difficile<br>FN665652.1 | 3161064-3160979 | AAAATTAAATGGCAAAATTAGGGAAATCTAATGACGCAAACTATAGGGATTAAAGCTTTTAAAGCCATATCAGCCAGTTGCTAAA             |
| Clostridium<br>complete genome | difficile<br>FN665652.1 | 3833856-3833952 | AAACTAAATCGGCAAACTAGAGAAATTTAGTGACGCAAAGCTATAGGGACTAACGCTTATAAAATAAACTATGAGTTATGTCAGCCAGTTGCCAAA  |
| Clostridium                    | difficile<br>FN665654.1 | 3087657-3087572 | AAAATTAAATGGCAAAATTAGGGAAATCTAATGACGCAAACTATAGGGATTAAAGCTTTTAAAGCCATATCAGCCAGTTGCTAAA             |

|                                          |            |                 |                                                                                                   |
|------------------------------------------|------------|-----------------|---------------------------------------------------------------------------------------------------|
| complete genome                          |            |                 |                                                                                                   |
| Clostridium difficile<br>complete genome | FN665654.1 | 1506125-1506029 | AAACTAAATCGGCAAACTAGAGAAATTTAGTGACGCAAAGCTATAGGGACTAACGCTTATAAAATAAACTATGAGTTATGTCAGCCAGTTGCCAAA  |
| Clostridium difficile<br>complete genome | FN665654.1 | 2148097-2148004 | TTCAGATATAGGCAATATTAGATAAATCTAATGACGCAAACTATAGGGACTAAAATCTTTATGTAATAAAGGTCATGTCAGCCAGTTGCCAAA     |
| Clostridium difficile<br>complete genome | FN665654.1 | 2149063-2149160 | AAACTAAATCGGCAAACTAGAGAAATTTAGTGACGCAAAGCTATAGGGACTAAGACTTATATAAATATCTTATGAGTTATGTCAGCCAGTTGCCAAA |
| Clostridium difficile<br>complete genome | FN665654.1 | 303777-303867   | AAACTAAATAGGCAAACTAGAGAAATCTAGTGACGCAAAGCTATAGGGGCTAAGGTTTGTATACACAACTATGTCAGCCAGTTGCCAAA         |
| Clostridium difficile<br>complete genome | FN665654.1 | 3128131-3128046 | AATTAAATGAGGCAAACTAGGGAAACCTAGTCACGCAAAGCTATAGGGGCTAAAGTTTAGTAAACCATGCCAGCCAGTTGCCGAA             |
| Clostridium difficile<br>complete genome | FN665654.1 | 2493763-2493852 | AAACTAAATCGGCAAACTAGAGAAATTTAGTGACGCAAAGCTATAGGGACTAACGCTTATAAAATAAGTTATGTCAGCCAGTTGCCAAA         |
| Clostridium difficile<br>complete genome | FN665654.1 | 2135608-2135697 | AAACTAAATAGGCAAACTAGAGAAATTTAGTGACGCAAAGCTATAGGGACTAAGACTTATGAAATGAGTTATGTCAGCCAGTTGCCAAA         |
| Clostridium difficile<br>complete genome | FN665654.1 | 3769710-3769806 | AAACTAAATCGGCAAACTAGAGAAATTTAGTGACGCAAAGCTATAGGGACTAACGCTTATAAAATAAACTATGAGTTATGTCAGCCAGTTGCCAAA  |
| Clostridium difficile M68                | FN668375.1 | 3838915-3839011 | AAACTAAATCGGCAAACTAGAGAAATTTAGTGACGCAAAGCTATAGGGACTAACGCTTATAAAATAAACTATGAGTTATGTCAGCCAGTTGCCAAA  |
| Clostridium difficile M68                | FN668375.1 | 2777561-2777658 | AGACTAAATCGGCAAACTAGAGAAATTTAGTGACGCAAAGCTATAGGGACTAAGACTTATATAAATATCTTATGAGTTATGTCAGCCAGTTGCCAAA |
| Clostridium difficile M68                | FN668375.1 | 2537871-2537960 | AAACTAAATCGGCAAACTAGAGAAATTTAGTGACGCAAAGCTATAGGGACTAACGCTTATAAAATAAGTTATGTCAGCCAGTTGCCAAA         |
| Clostridium difficile M68                | FN668375.1 | 2186681-2186588 | TTCAGATATAGGCAATATTAGATAAATCTAATGACGCAAACTATAGGGACTAAAATCTTTATGTAATAAAGGTCATGTCAGCCAGTTGCCAAA     |
| Clostridium difficile M68                | FN668375.1 | 1527335-1527239 | AAACTAAATCGGCAAACTAGAGAAATTTAGTGACGCAAAGCTATAGGGACTAACGCTTATAAAATAAACTATGAGTTATGTCAGCCAGTTGCCAAA  |
| Clostridium difficile M68                | FN668375.1 | 2176075-2176164 | AAACTAAATAGGCAAACTAGAGAAATTTAGTGACGCAAAGCTATAGGGACTAAGACTTATGAAATGAGTTATGTCAGCCAGTTGCCAAA         |
| Clostridium difficile M68                | FN668375.1 | 242414-242504   | AAACTAAATAGGCAAACTAGAGAAATCTAGTGACGCAAAGCTATAGGGACTAAGGTTTGTATACATGAATATGTCAGCCAGTTGCCAAA         |
| Clostridium difficile M68                | FN668375.1 | 3138201-3138116 | AAAATTAAATGGCAAAATTAGGGAAATCTAATGACGCAAACTATAGGGATTAAAGCTTTTAAAGCCATATCAGCCAGTTGCTAAA             |

|                                            |                |                 |                                                                                                  |
|--------------------------------------------|----------------|-----------------|--------------------------------------------------------------------------------------------------|
| Clostridium difficile M68                  | FN668375.1     | 3175448-3175363 | AATTAAATGAGGCAAACTAGGGAAACCTAGTCACGCAAAGCTATAGGGGCTAAAGTTTAGTAAACCATGCCAGCCAGTTGCCGAA            |
| Clostridium difficile NAP07<br>contig00006 | ADVM01000002.1 | 7478-7391       | AAACTTAATAGGCAAACTAGAGAAATCTAGGGACGCAAAGCTATAGGGGTTAAGGTCTTAAAAAGATTATGCCTGCCAGTTACTAAA          |
| Clostridium difficile NAP07<br>contig00010 | ADVM01000006.1 | 65172-65257     | AATTAAATGAGGCAAACTAGGGAAACCTAGTCACGCAAAGCTATAGGGGCTAAAGTTTAGTAAACCATGCCAGCCAGTTGCCGAA            |
| Clostridium difficile NAP07<br>contig00034 | ADVM01000029.1 | 193174-193085   | AAACTAAATCGGCAAACTAGAGAAATTTAGTGACGCAAAGCTATAGGGACTAACGCTTATAAAATAAGTTATGTCAGCCAGTTGCCAAA        |
| Clostridium difficile NAP07<br>contig00044 | ADVM01000039.1 | 154161-154250   | AAACTAAATAGGCAAACTAGAGAAATTTAGTGACGCAAAGCTATAGGGACTAAGACTTATGAAATGAGTTATGTCAGCCAGTTGCCAAA        |
| Clostridium difficile NAP07<br>contig00044 | ADVM01000039.1 | 164766-164673   | TTCATATATAGGCAATATTAGATAAATCTAATGACGCAAACTATAGGGACTAAAATCTTTATATAATAAAGGTCATGTCAGCCAGTTGCCAAA    |
| Clostridium difficile NAP07<br>contig00216 | ADVM01000060.1 | 25133-25229     | AAACTAAATCGGCAAACTAGAGAAATTTAGTGACGCAAAGCTATAGGGACTAACGCTTATAAAATAAAATATGAGTTATGTCAGCCAGTTGCCAAA |
| Clostridium difficile NAP08<br>contig00033 | ADNX01000031.1 | 165170-165081   | AAACTAAATCGGCAAACTAGAGAAATTTAGTGACGCAAAGCTATAGGGACTAACGCTTATAAAATAAGTTATGTCAGCCAGTTGCCAAA        |
| Clostridium difficile NAP08<br>contig00041 | ADNX01000039.1 | 53861-53954     | TTCATATATAGGCAATATTAGATAAATCTAATGACGCAAACTATAGGGACTAAAATCTTTATATAATAAAGGTCATGTCAGCCAGTTGCCAAA    |
| Clostridium difficile NAP08<br>contig00041 | ADNX01000039.1 | 64466-64377     | AAACTAAATAGGCAAACTAGAGAAATTTAGTGACGCAAAGCTATAGGGACTAAGACTTATGAAATGAGTTATGTCAGCCAGTTGCCAAA        |
| Clostridium difficile NAP08<br>contig00099 | ADNX01000073.1 | 38633-38537     | AAACTAAATCGGCAAACTAGAGAAATTTAGTGACGCAAAGCTATAGGGACTAACGCTTATAAAATAAAATATGAGTTATGTCAGCCAGTTGCCAAA |
| Clostridium difficile NAP08<br>contig00110 | ADNX01000084.1 | 7475-7388       | AAACTTAATAGGCAAACTAGAGAAATCTAGGGACGCAAAGCTATAGGGGTTAAGGTCTTAAAAAGATTATGCCTGCCAGTTACTAAA          |
| Clostridium difficile NAP08<br>contig00115 | ADNX01000089.1 | 65151-65236     | AATTAAATGAGGCAAACTAGGGAAACCTAGTCACGCAAAGCTATAGGGGCTAAAGTTTAGTAAACCATGCCAGCCAGTTGCCGAA            |

|                                                                  |                |               |                                                                                                   |
|------------------------------------------------------------------|----------------|---------------|---------------------------------------------------------------------------------------------------|
| Clostridium difficile<br>QCD-23m63 contig00024_2                 | ABKL02000024.1 | 185065-185154 | AAACTAAATAGGCAAACTAGAGAAATTTAGTGACGCAAAGCTATAGGGACTAAGACTTATGAAATGAGTTATGTCAGCCAGTTGCCAAA         |
| Clostridium difficile<br>QCD-23m63 contig00024_2                 | ABKL02000024.1 | 195670-195577 | TTCATATATAGGCAATATTAGATAAATCTAATGACGCAAACTATAGGGACTAAAATCTTTATATAATAAAGGTCATGTCAGCCAGTTGCCAAA     |
| Clostridium difficile<br>QCD-23m63 contig00025_2                 | ABKL02000025.1 | 123335-123424 | AAACTAAATCGGCAAACTAGAGAAATTTAGTGACGCAAAGCTATAGGGACTAACGCTTATAAAATAAGTTATGTCAGCCAGTTGCCAAA         |
| Clostridium difficile<br>QCD-23m63 contig00031_2                 | ABKL02000031.1 | 19674-19589   | AATTAAATGAGGCAAACTAGGGAAACCTAGTCACGCAAAGCTATAGGGGCTAAAGTTTAGTAAACCATGCCAGCCAGTTGCCGAA             |
| Clostridium difficile<br>QCD-23m63 contig00032_2                 | ABKL02000032.1 | 53675-53762   | AAACTTAATAGGCAAACCTAGAGAAATCTAGGGACGCAAAGCTATAGGGGTTAAGGTCTTAAAAAGATTATGCCTGCCAGTTACTAAA          |
| Clostridium difficile<br>QCD-23m63 contig00039_2                 | ABKL02000039.1 | 21221-21317   | AAACTAAATCGGCAAACTAGAGAAATTTAGTGACGCAAAGCTATAGGGACTAACGCTTATAAAATAAAATATGAGTTATGTCAGCCAGTTGCCAAA  |
| Clostridium difficile<br>QCD-32g58<br>C_difficile_bld4_cont00003 | AAML04000003.1 | 159704-159794 | AAACTAAATAGGCAAATCTAGAGAAATCTAGTGACGCAAAGCTATAGGGGCTAAGGTTTGTATACACAACTATGTCAGCCAGTTGCCAAA        |
| Clostridium difficile<br>QCD-32g58<br>C_difficile_bld4_cont00010 | AAML04000010.1 | 412864-412768 | AAACTAAATCGGCAAACTAGAGAAATTTAGTGACGCAAAGCTATAGGGACTAACGCTTATAAAATAAACTATGAGTTATGTCAGCCAGTTGCCAAA  |
| Clostridium difficile<br>QCD-32g58<br>C_difficile_bld4_cont00013 | AAML04000013.1 | 108853-108760 | TTCAGATATAGGCAATATTAGATAAATCTAATGACGCAAACTATAGGGACTAAAATCTTTATGTAATAAAGGTCATGTCAGCCAGTTGCCAAA     |
| Clostridium difficile<br>QCD-32g58<br>C_difficile_bld4_cont00013 | AAML04000013.1 | 109821-109918 | AAACTAAATCGGCAAACTAGAGAAATTTAGTGACGCAAAGCTATAGGGACTAAGACTTATATAAATATCTTATGAGTTATGTCAGCCAGTTGCCAAA |
| Clostridium difficile<br>QCD-32g58<br>C_difficile_bld4_cont00013 | AAML04000013.1 | 96368-96457   | AAACTAAATAGGCAAACTAGAGAAATTTAGTGACGCAAAGCTATAGGGACTAAGACTTATGAAATGAGTTATGTCAGCCAGTTGCCAAA         |

|                                                                  |                |                 |                                                                                                   |
|------------------------------------------------------------------|----------------|-----------------|---------------------------------------------------------------------------------------------------|
| QCD-32g58<br>C_difficile_bld4_cont00013                          |                |                 |                                                                                                   |
| Clostridium difficile<br>QCD-32g58<br>C_difficile_bld4_cont00014 | AAML04000014.1 | 1065-1154       | AAACTAAATCGGCAAACTAGAGAAATTTAGTGACGCAAAGCTATAGGGACTAACGCTTATAAAATAAGTTATGTCAGCCAGTTGCCAAA         |
| Clostridium difficile<br>QCD-32g58<br>C_difficile_bld4_cont00014 | AAML04000014.1 | 635378-635293   | AATTAAATGAGGCAAACTAGGGAAACCTAGTCACGCAAAGCTATAGGGGCTAAAGTTTATGTAACCATGCCAGCCAGTTGCCGAA             |
| Clostridium difficile<br>QCD-32g58<br>C_difficile_bld4_cont00014 | AAML04000014.1 | 594909-594824   | AAAATTAAATGGCAAAATTAGGGAAATCTAATGACGCAAACTATAGGGATTAAAGCTTTTAAAGCCATATCAGCCAGTTGCTAAA             |
| Clostridium difficile<br>QCD-32g58<br>C_difficile_bld4_cont00014 | AAML04000014.1 | 1246925-1247021 | AAACTAAATCGGCAAACTAGAGAAATTTAGTGACGCAAAGCTATAGGGACTAACGCTTATAAAATAAACTATGAGTTATGTCAGCCAGTTGCCAAA  |
| Clostridium difficile<br>QCD-37x79 contig00003_2                 | ABHG02000003.1 | 159789-159879   | AAACTAAATAGGCAAATCTAGAGAAATCTAGTGACGCAAAGCTATAGGGGCTAAGGTTTGTATACACAACTATGTCAGCCAGTTGCCAAA        |
| Clostridium difficile<br>QCD-37x79 contig00015_2                 | ABHG02000015.1 | 218853-218757   | AAACTAAATCGGCAAACTAGAGAAATTTAGTGACGCAAAGCTATAGGGACTAACGCTTATAAAATAAACTATGAGTTATGTCAGCCAGTTGCCAAA  |
| Clostridium difficile<br>QCD-37x79 contig00017_2                 | ABHG02000017.1 | 557084-557173   | AAACTAAATAGGCAAACTAGAGAAATTTAGTGACGCAAAGCTATAGGGACTAAGACTTATGAAATGAGTTATGTCAGCCAGTTGCCAAA         |
| Clostridium difficile<br>QCD-37x79 contig00018_2                 | ABHG02000018.1 | 10504-10411     | TTCAGATATAGGCAATATTAGATAAATCTAATGACGCAAACTATAGGGACTAAAATCTTTATGTAATAAAGGTCATGTCAGCCAGTTGCCAAA     |
| Clostridium difficile<br>QCD-37x79 contig00018_2                 | ABHG02000018.1 | 11470-11567     | AAACTAAATCGGCAAACTAGAGAAATTTAGTGACGCAAAGCTATAGGGACTAAGACTTATATAAATATCTTATGAGTTATGTCAGCCAGTTGCCAAA |
| Clostridium difficile<br>QCD-37x79 contig00019.1                 | ABHG02000019.1 | 692-781         | AAACTAAATCGGCAAACTAGAGAAATTTAGTGACGCAAAGCTATAGGGACTAACGCTTATAAAATAAGTTATGTCAGCCAGTTGCCAAA         |

|                                                  |                |               |                                                                                                   |
|--------------------------------------------------|----------------|---------------|---------------------------------------------------------------------------------------------------|
| QCD-37x79 contig00019_2                          |                |               |                                                                                                   |
| Clostridium difficile<br>QCD-37x79 contig00023_2 | ABHG02000023.1 | 108586-108501 | AAAATTAAATGGCAAAATTAGGGAAATCTAATGACGCAAACTATAGGGATTAAAGCTTTTAAAGCCATATCAGCCAGTTGCTAAA             |
| Clostridium difficile<br>QCD-37x79 contig00023_2 | ABHG02000023.1 | 149059-148974 | AATTAAATGAGGCAAACTAGGGAAACCTAGTCACGCAAAGCTATAGGGGCTAAAGTTTAGTAAACCATGCCAGCCAGTTGCCGAA             |
| Clostridium difficile<br>QCD-37x79 contig00025_2 | ABHG02000025.1 | 140267-140363 | AAACTAAATCGGCAAACTAGAGAAATTTAGTGACGCAAAGCTATAGGGACTAACGCTTATAAAATAAACTATGAGTTATGTCAGCCAGTTGCCAAA  |
| Clostridium difficile<br>QCD-63q42 contig00006_2 | ABHD02000006.1 | 63126-63216   | AAACTAAATAGGCAAACTAGAGAAATCTAGTGACGCAAAGCTATAGGGACTAAGGTTTATATACATGAACATGTCAGCCAGTTGCCAAA         |
| Clostridium difficile<br>QCD-63q42 contig00014_2 | ABHD02000014.1 | 122952-122856 | AAACTAAATCGGCAAACTAGAGAAATTTAGTGACGCAAAGCTATAGGGACTAACGCTTATAAAATAAACTATGAGTTATGTCAGCCAGTTGCCAAA  |
| Clostridium difficile<br>QCD-63q42 contig00025_2 | ABHD02000025.1 | 543312-543401 | AAACTAAATCGGCAAACTAGAGAAATTTAGTGACGCAAAGCTATAGGGACTAACGCTTATAAAATAAGTTATGTCAGCCAGTTGCCAAA         |
| Clostridium difficile<br>QCD-63q42 contig00025_2 | ABHD02000025.1 | 178678-178775 | AAACTAAATCGGCAAACTAGAGAAATTTAGTGACGCAAAGCTATAGGGACTAAGACTTATATAAATATCTTATGAGTTATGTCAGCCAGTTGCCAAA |
| Clostridium difficile<br>QCD-63q42 contig00025_2 | ABHD02000025.1 | 167089-167178 | AAACTAAATAGGCAAACTAGAGAAATTTAGTGACGCAAAGCTATAGGGACTAAGACTTATGAAATGAGTTATGTCAGCCAGTTGCCAAA         |
| Clostridium difficile<br>QCD-63q42 contig00025_2 | ABHD02000025.1 | 177698-177605 | TTCAGATATAGGCAATATTAGATAAATCTAATGACGCAAACTATAGGGACTAAAATCTTTATGTAATAAAGGTCATGTCAGCCAGTTGCCAAA     |
| Clostridium difficile<br>QCD-63q42 contig00025_2 | ABHD02000025.1 | 781818-781915 | AAACTAAATCGGCAAACTAGAGAAATCTAGTGACGCAAAGCTATAGGGACTAAGACTTATATAAATATCTTATGAGTTATGTTAGCCAGTTGCCAAA |
| Clostridium difficile<br>QCD-63q42 contig00026_2 | ABHD02000026.1 | 145149-145064 | AATTAAATGAGGCAAACTAGGGAAACCTAGTCACGCAAAGCTATAGGGGCTAAAGTTTAGTAAACCATGCCAGCCAGTTGCCGAA             |
| Clostridium difficile<br>QCD-63q42 contig00026_2 | ABHD02000026.1 | 108601-108516 | AAAATTAAATGGCAAAATTAGGGAAATCTAATGACGCAAACTATAGGGATTAAAGCTTTTAAAGCCATATCAGCCAGTTGCTAAA             |

|                                                  |                |               |                                                                                                   |
|--------------------------------------------------|----------------|---------------|---------------------------------------------------------------------------------------------------|
| Clostridium difficile<br>QCD-63q42 contig00027_2 | ABHD02000027.1 | 217626-217723 | AAACTAAATCGGCAAACTAGAGAAATTTAGTGACGCAAAGCTATAGGGACTAAGACTTATATAAATATCTTATGAGTTATGTCAGCCAGTTGCCAAA |
| Clostridium difficile<br>QCD-63q42 contig00029_2 | ABHD02000029.1 | 23174-23270   | AAACTAAATCGGCAAACTAGAGAAATTTAGTGACGCAAAGCTATAGGGACTAACGCTTATAAAATAAACTATGAGTTATGTCAGCCAGTTGCCAAA  |
| Clostridium difficile<br>QCD-66c26 contig00003_2 | ABFD02000003.1 | 159708-159798 | AAACTAAATAGGCAAATCTAGAGAAATCTAGTGACGCAAAGCTATAGGGGCTAAGGTTTGTATACACAACTATGTCAGCCAGTTGCCAAA        |
| Clostridium difficile<br>QCD-66c26 contig00008_2 | ABFD02000008.1 | 415686-415590 | AAACTAAATCGGCAAACTAGAGAAATTTAGTGACGCAAAGCTATAGGGACTAACGCTTATAAAATAAACTATGAGTTATGTCAGCCAGTTGCCAAA  |
| Clostridium difficile<br>QCD-66c26 contig00010_2 | ABFD02000010.1 | 454536-454625 | AAACTAAATCGGCAAACTAGAGAAATTTAGTGACGCAAAGCTATAGGGACTAACGCTTATAAAATAAGTTATGTCAGCCAGTTGCCAAA         |
| Clostridium difficile<br>QCD-66c26 contig00010_2 | ABFD02000010.1 | 109828-109925 | AAACTAAATCGGCAAACTAGAGAAATTTAGTGACGCAAAGCTATAGGGACTAAGACTTATATAAATATCTTATGAGTTATGTCAGCCAGTTGCCAAA |
| Clostridium difficile<br>QCD-66c26 contig00010_2 | ABFD02000010.1 | 108862-108769 | TTCAGATATAGGCAATATTAGATAAATCTAATGACGCAAACTATAGGGACTAAAATCTTTATGTAATAAAGGTCATGTCAGCCAGTTGCCAAA     |
| Clostridium difficile<br>QCD-66c26 contig00010_2 | ABFD02000010.1 | 96374-96463   | AAACTAAATAGGCAAACTAGAGAAATTTAGTGACGCAAAGCTATAGGGACTAAGACTTATGAAATGAGTTATGTCAGCCAGTTGCCAAA         |
| Clostridium difficile<br>QCD-66c26 contig00011_2 | ABFD02000011.1 | 110690-110605 | AAAATTAATGGCAAAATTAGGGAAATCTAATGACGCAAACTATAGGGATTAAAGCTTTTAAAGCCATATCAGCCAGTTGCTAAA              |
| Clostridium difficile<br>QCD-66c26 contig00011_2 | ABFD02000011.1 | 151162-151077 | AATTAAATGAGCAAACTAGGGAAACCTAGTCACGCAAAGCTATAGGGGCTAAAGTTTATGTAACCATGCCAGCCAGTTGCCGAA              |
| Clostridium difficile<br>QCD-66c26 contig00012_2 | ABFD02000012.1 | 238844-238940 | AAACTAAATCGGCAAACTAGAGAAATTTAGTGACGCAAAGCTATAGGGACTAACGCTTATAAAATAAACTATGAGTTATGTCAGCCAGTTGCCAAA  |
| Clostridium difficile<br>QCD-76w55 contig00004_2 | ABHE02000004.1 | 159958-160048 | AAACTAAATAGGCAAATCTAGAGAAATCTAGTGACGCAAAGCTATAGGGGCTAAGGTTTGTATACACAACTATGTCAGCCAGTTGCCAAA        |
| Clostridium difficile                            | ABHE02000023.1 | 219622-219526 | AAACTAAATCGGCAAACTAGAGAAATTTAGTGACGCAAAGCTATAGGGACTAACGCTTATAAAATAAACTATGAGTTATGTCAGCCAGTTGCCAAA  |

|                                                  |                |               |                                                                                                   |
|--------------------------------------------------|----------------|---------------|---------------------------------------------------------------------------------------------------|
| QCD-76w55 contig00023_2                          |                |               |                                                                                                   |
| Clostridium difficile<br>QCD-76w55 contig00026_2 | ABHE02000026.1 | 354921-355010 | AAACTAAATAGGCAAACTAGAGAAATTTAGTGACGCAAAGCTATAGGGACTAAGACTTATGAAATGAGTTATGTCAGCCAGTTGCCAAA         |
| Clostridium difficile<br>QCD-76w55 contig00027_2 | ABHE02000027.1 | 10811-10718   | TTCAGATATAGGCAATATTAGATAAATCTAATGACGCAAACTATAGGGACTAAAATCTTTATGTAATAAAGGTCATGTCAGCCAGTTGCCAAA     |
| Clostridium difficile<br>QCD-76w55 contig00027_2 | ABHE02000027.1 | 11777-11874   | AAACTAAATCGGCAAACTAGAGAAATTTAGTGACGCAAAGCTATAGGGACTAAGACTTATATAAATATCTTATGAGTTATGTCAGCCAGTTGCCAAA |
| Clostridium difficile<br>QCD-76w55 contig00028_2 | ABHE02000028.1 | 1261-1350     | AAACTAAATCGGCAAACTAGAGAAATTTAGTGACGCAAAGCTATAGGGACTAACGCTTATAAAATAAGTTATGTCAGCCAGTTGCCAAA         |
| Clostridium difficile<br>QCD-76w55 contig00032_2 | ABHE02000032.1 | 27252-27167   | AAAATTAAATGGCAAAATTAGGGAAATCTAATGACGCAAACTATAGGGATTAAAGCTTTTAAAGCCATATCAGCCAGTTGCTAAA             |
| Clostridium difficile<br>QCD-76w55 contig00034_2 | ABHE02000034.1 | 6392-6307     | AATTAAATGAGGCAAACTAGGGAAACCTAGTCACGCAAAGCTATAGGGGCTAAAGTTTAGTAAACCATGCCAGCCAGTTGCCGAA             |
| Clostridium difficile<br>QCD-76w55 contig00037_2 | ABHE02000037.1 | 202629-202725 | AAACTAAATCGGCAAACTAGAGAAATTTAGTGACGCAAAGCTATAGGGACTAACGCTTATAAAATAAACTATGAGTTATGTCAGCCAGTTGCCAAA  |
| Clostridium difficile<br>QCD-97b34 contig00006_2 | ABHF02000006.1 | 63218-63308   | AAACTAAATAGGCAAACTAGAGAAATCTAGTGACGCAAAGCTATAGGGGCTAAGGTTTGTATACACAACTATGTCAGCCAGTTGCCAAA         |
| Clostridium difficile<br>QCD-97b34 contig00026_2 | ABHF02000026.1 | 218696-218600 | AAACTAAATCGGCAAACTAGAGAAATTTAGTGACGCAAAGCTATAGGGACTAACGCTTATAAAATAAACTATGAGTTATGTCAGCCAGTTGCCAAA  |
| Clostridium difficile<br>QCD-97b34 contig00030_2 | ABHF02000030.1 | 96509-96598   | AAACTAAATAGGCAAACTAGAGAAATTTAGTGACGCAAAGCTATAGGGACTAAGACTTATGAAATGAGTTATGTCAGCCAGTTGCCAAA         |
| Clostridium difficile<br>QCD-97b34 contig00031_2 | ABHF02000031.1 | 9736-9643     | TTCAGATATAGGCAATATTAGATAAATCTAATGACGCAAACTATAGGGACTAAAATCTTTATGTAATAAAGGTCATGTCAGCCAGTTGCCAAA     |
| Clostridium difficile<br>QCD-97b34 contig00031_2 | ABHF02000031.1 | 10702-10799   | AAACTAAATCGGCAAACTAGAGAAATTTAGTGACGCAAAGCTATAGGGACTAAGACTTATATAAATATCTTATGAGTTATGTCAGCCAGTTGCCAAA |



|                                                  |                |                 |                                                                                                   |
|--------------------------------------------------|----------------|-----------------|---------------------------------------------------------------------------------------------------|
| Clostridium difficile<br>QCD-97b34 contig00032_2 | ABHF02000032.1 | 118-207         | AAACTAAATCGGCAAACTAGAGAAATTTAGTGACGCAAAGCTATAGGGACTAACGCTTATAAAATAAGTTATGTCAGCCAGTTGCCAAA         |
| Clostridium difficile<br>QCD-97b34 contig00035_2 | ABHF02000035.1 | 108615-108530   | AAAATTAAATGGCAAAATTAGGGAAATCTAATGACGCAAACTATAGGGATTAAAGCTTTTAAAGCCATATCAGCCAGTTGCTAAA             |
| Clostridium difficile<br>QCD-97b34 contig00037_2 | ABHF02000037.1 | 5331-5246       | AATTAAATGAGGCAAACTAGGGAAACCTAGTCACGCAAAGCTATAGGGGCTAAAGTTTAGTAAACCATGCCAGCCAGTTGCCGAA             |
| Clostridium difficile<br>QCD-97b34 contig00040_2 | ABHF02000040.1 | 327991-328087   | AAACTAAATCGGCAAACTAGAGAAATTTAGTGACGCAAAGCTATAGGGACTAACGCTTATAAAATAAACTATGAGTTATGTCAGCCAGTTGCCAAA  |
| Clostridium difficile R20291<br>complete genome  | FN545816.1     | 2237000-2236907 | TTCAGATATAGGCAATATTAGATAAATCTAATGACGCAAACTATAGGGACTAAAATCTTTATGTAATAAAGGTCATGTCAGCCAGTTGCCAAA     |
| Clostridium difficile R20291<br>complete genome  | FN545816.1     | 1510328-1510232 | AAACTAAATCGGCAAACTAGAGAAATTTAGTGACGCAAAGCTATAGGGACTAACGCTTATAAAATAAACTATGAGTTATGTCAGCCAGTTGCCAAA  |
| Clostridium difficile R20291<br>complete genome  | FN545816.1     | 3217186-3217101 | AATTAAATGAGGCAAACTAGGGAAACCTAGTCACGCAAAGCTATAGGGGCTAAAGTTTAGTAAACCATGCCAGCCAGTTGCCGAA             |
| Clostridium difficile R20291<br>complete genome  | FN545816.1     | 2224510-2224599 | AAACTAAATAGGCAAACTAGAGAAATTTAGTGACGCAAAGCTATAGGGACTAAGACTTATGAAATGAGTTATGTCAGCCAGTTGCCAAA         |
| Clostridium difficile R20291<br>complete genome  | FN545816.1     | 2237966-2238063 | AAACTAAATCGGCAAACTAGAGAAATTTAGTGACGCAAAGCTATAGGGACTAAGACTTATATAAATATCTTATGAGTTATGTCAGCCAGTTGCCAAA |
| Clostridium difficile R20291<br>complete genome  | FN545816.1     | 308010-308100   | AAACTAAATAGGCAAACTAGAGAAATCTAGTGACGCAAAGCTATAGGGGCTAAGGTTTGTATACACAACTATGTCAGCCAGTTGCCAAA         |
| Clostridium difficile R20291<br>complete genome  | FN545816.1     | 2582672-2582761 | AAACTAAATCGGCAAACTAGAGAAATTTAGTGACGCAAAGCTATAGGGACTAACGCTTATAAAATAAGTTATGTCAGCCAGTTGCCAAA         |
| Clostridium difficile R20291<br>complete genome  | FN545816.1     | 3176712-3176627 | AAAATTAAATGGCAAAATTAGGGAAATCTAATGACGCAAACTATAGGGATTAAAGCTTTTAAAGCCATATCAGCCAGTTGCTAAA             |
| Clostridium difficile R20291                     | FN545816.1     | 3831022-3831118 | AAACTAAATCGGCAAACTAGAGAAATTTAGTGACGCAAAGCTATAGGGACTAACGCTTATAAAATAAACTATGAGTTATGTCAGCCAGTTGCCAAA  |

|                                                                      |                |                 |                                                                                              |
|----------------------------------------------------------------------|----------------|-----------------|----------------------------------------------------------------------------------------------|
| complete genome                                                      |                |                 |                                                                                              |
| Clostridium hathewayi DSM<br>13479<br>C_hathewayi-2.0_Cont164.3      | ACIO01000620.1 | 655-727         | ATATAGTAATGGCAAACTGTGCGAAAGGCAGTGACGCAAAGCTAAAGGGCCGTATGGGCAGCCAGCTGCTAAA                    |
| Clostridium hathewayi<br>WAL-18680 cont1.75                          | ADLN01000075.1 | 7720-7628       | TTACATATTCGGCACATCTGTTGAAAAGCAGAGTCGCAAACTTTAGGGGCTAACCCATTTGGAAACGAATGGTATGCCAGCCAGTTGCACAT |
| Clostridium hylemonae<br>DSM 15053<br>C_hylemonae-2.0.1_Cont0.1<br>6 | ABYI02000008.1 | 20274-20192     | TGAACAGATGGAAATATATAGAAATATTTGACAAAGCCAGAGGGCCTAAGCAGAAATGACATGTATGGCAGCCGGCTGCACTC          |
| Clostridium kluyveri DSM<br>555                                      | CP000673.1     | 2377705-2377793 | TATTGATAATAGCACACTTATCGAAAGGTAGGGTCGCAAAGCTATGGGTCTTAAGAAAATTATTTTCTATGATTGCCAGGTTGCCAAA     |
| Clostridium kluyveri DSM<br>555                                      | CP000673.1     | 3562398-3562309 | TATTGATAATAGCACACTTATTGAAAAATAAGGTCGCAAAGCTATGGGTCTAAAGAAAAGTTATTTTCTATGATTGCCAGGTTGCCAAA    |
| Clostridium kluyveri DSM<br>555                                      | CP000673.1     | 3897171-3897085 | TCCGACAAAGGGCAAACTTGCCGAAAGGTAAGGACGCAAAGCCGAGGGTCTAAAGTGCGAGAGCATTATGACAGTCTGGCTGCCGTA      |
| Clostridium kluyveri NBRC<br>12016 DNA                               | AP009049.1     | 3828674-3828588 | TCCGACAAAGGGCAAACTTGCCGAAAGGTAAGGACGCAAAGCCGAGGGTCTAAAGTGCGAGAGCATTATGACAGTCTGGCTGCCGTA      |
| Clostridium kluyveri NBRC<br>12016 DNA                               | AP009049.1     | 2309208-2309296 | TATTGATAATAGCACACTTATCGAAAGGTAGGGTCGCAAAGCTATGGGTCTTAAGAAAATTATTTTCTATGATTGCCAGGTTGCCAAA     |
| Clostridium kluyveri NBRC<br>12016 DNA                               | AP009049.1     | 3493900-3493811 | TATTGATAATAGCACACTTATTGAAAAATAAGGTCGCAAAGCTATGGGTCTAAAGAAAAGTTATTTTCTATGATTGCCAGGTTGCCAAA    |
| Clostridium ljungdahlii<br>DSM 13528                                 | CP001666.1     | 2698829-2698742 | CATTGATAATAGCACATTTATCGAAAGGTAAAGTCGCAAAGCTATGGGTCTAAAGAAAATTATTTTCTATGATTGCCAGGTTACCAAA     |
| Clostridium novyi NT                                                 | CP000382.1     | 1871611-1871526 | CAACGATAAAGGCAAAATTTAGTGAAAAGCTAGAGACGCAAAGCTAAAGGGCCTTCCTTAGTTATTAAGATGGCAGCCAGTTACCGAA     |

|                                                                      |                |                 |                                                                                          |
|----------------------------------------------------------------------|----------------|-----------------|------------------------------------------------------------------------------------------|
| Clostridium papyrosolvens<br>DSM 2782 ctg49                          | ACXX02000016.1 | 57333-57416     | TAATGTTAAGGGCAAACCTTGCTGAAAAGCAAGGACGCAAAGCTACGAGTCTAAAGCGTAATGCCAGGATGGTCGGGTTGCCAAA    |
| Clostridium papyrosolvens<br>DSM 2782 ctg65                          | ACXX02000001.1 | 388494-388577   | ATGGATTTTTAGTAAATCTGTGCGAAAGGCAGAGACACAAAGCTACGAGTCTAAAGCATGATGCTATGACAGTCGGGTTGCAGAT    |
| Clostridium papyrosolvens<br>DSM 2782 ctg65                          | ACXX02000001.1 | 460758-460840   | CACCGACAAAGGCAAACCTAATCGAAAGATTAGGACGCAAACTATAGGGTCTTACTCATTTGAGTTGATAGCCAGTTACCGAA      |
| Clostridium perfringens<br>ATCC 13124                                | CP000246.1     | 1218268-1218355 | ATAATATATTGGCAAACCTAGGGAAATCTAGAGACGCAAAGCTAAAGGGGCTAAGGTTATATGATAACTATGCTAGCCAGTTGCCGAA |
| Clostridium perfringens<br>ATCC 13124                                | CP000246.1     | 1695696-1695613 | TAAAAAATGGGCAAAATTAGAGAAATCTAATGACGCAAAGCTATAGGGACTAAGGTTTATAACTATGTCAGCCAGTTGCCAAA      |
| Clostridium perfringens B<br>str. ATCC 3626<br>gcontig_1106202601658 | ABDV01000039.1 | 10616-10703     | ATAATATATTGGCAAACCTAGGGAAATCTAGAGACGCAAAGCTAAAGGGGCTAAGGTTATATGATAACTATGCTAGCCAGTTGCTGAA |
| Clostridium perfringens B<br>str. ATCC 3626<br>gcontig_1106202601684 | ABDV01000006.1 | 21251-21334     | TAAAAAATGGGCAAAATTAGAGAAATCTAATGACGCAAAGCTATAGGGACTAAGGTTTATAACTATGTCAGCCAGTTGCCAAA      |
| Clostridium perfringens C<br>str. JGS1495<br>gcontig_1106166513243   | ABDU01000076.2 | 6941-6854       | ATAATATATTGGCAAACCTAGGGAAATCTAGAGACGCAAAGCTAAAGGGGCTAAGGTTATATGATAACTATGCTAGTCAGTTGCTGAA |
| Clostridium perfringens C<br>str. JGS1495<br>gcontig_1106166513253   | ABDU01000065.2 | 900-817         | TAAAAAATGGGCAAAATTAGAGAAATCTAATGACGCAAAGCTATAGGGACTAAGGTTTATAACTATGTCAGCCAGTTGCCAAA      |
| Clostridium perfringens<br>CPE str. F4969<br>gcontig_1106202596926   | ABDX01000004.1 | 24814-24897     | TAAAAAATGGGCAAAATTAGAGAAATCTAATGACGCAAAGCTATAGGGACTAAGGTTTATAACTATGTCAGCCAGTTGCCAAA      |

|                                                                    |                |                 |                                                                                          |
|--------------------------------------------------------------------|----------------|-----------------|------------------------------------------------------------------------------------------|
| Clostridium perfringens<br>CPE str. F4969<br>gcontig_1106202599046 | ABDX01000001.1 | 131078-130991   | ATAATATATTGGCAAACCTAGGGAAATCTAGAGACGCAAAGCTAAAGGGGCTAAGGTTATATGATAACTATGCTAGCCAGTTGCTGAA |
| Clostridium perfringens D<br>str. JGS1721<br>gcontig_1108490430993 | ABOO01000003.1 | 113271-113188   | AAAAAAAATGGGCAAAATTAGAGAAATCTAATGACGCAAAGCTATAGGGACTAAGGTTTATAACTATGTCAGCCAGTTGCCAAA     |
| Clostridium perfringens D<br>str. JGS1721<br>gcontig_1108490431123 | ABOO01000024.1 | 23728-23815     | ATAATATATTGGCAAACCTAGGGAAATCTAGAGACGCAAAGCTAAAGGGGCTAAGGTTATATGATAACTATGCTAGCCAGTTGCCGAA |
| Clostridium perfringens E<br>str. JGS1987<br>gcontig_1106202897252 | ABDW01000004.1 | 131179-131263   | ATAATATATTGGCAAATCTAGAGAAATTTAGAGACGCAAAGCTAAAGGGGCTAAGGTTATATAACTATGCTAGCCAGTTGCCAAA    |
| Clostridium perfringens E<br>str. JGS1987<br>gcontig_1106202899234 | ABDW01000037.1 | 13611-13528     | TAAAAAATGGGCAAAATTAGAGAAATCTAATGACGCAAAGCTATAGGGACTAAGGTTTATAACTATGTCAGCCAGTTGCCAAA      |
| Clostridium perfringens<br>NCTC 8239<br>gcontig_1106202603774      | ABDY01000002.1 | 211393-211306   | ATAATATATTGGCAAACCTAGGGAAATCTAGAGACGCAAAGCTAAAGGGGCTAAGGTTATATGATAACTATGCTAGCCAGTTGCCGAA |
| Clostridium perfringens<br>NCTC 8239<br>gcontig_1106202603786      | ABDY01000007.1 | 25749-25832     | TAAAAAATGGGCAAAATTAGAGAAATCTAATGACGCAAAGCTATAGGGACTAAGGTTTATAACTATGTCAGCCAGTTGCCAAA      |
| Clostridium perfringens<br>SM101                                   | CP000312.1     | 1445209-1445126 | TTTAAATTCGGCAAAATTAGAGAAATCTAATGACGCAAAGCTATAGGGACTAAGGTTTATAACTATGTCAGCCAGTTGCCAAA      |
| Clostridium perfringens str.<br>13 DNA                             | BA000016.3     | 1510292-1510209 | TAAAAAATGGGCAAAATTAGAGAAATCTAATGACGCAAAGCTATAGGGACTAAGGTTTATAACTATGTCAGCCAGTTGCCAAA      |

|                                                            |                |                 |                                                                                                |
|------------------------------------------------------------|----------------|-----------------|------------------------------------------------------------------------------------------------|
| Clostridium phage phiCD27                                  | EU719189.1     | 33053-32958     | AAACTAAATCGGCAAACTAGAGAAAATTAGTGACGCAAAGCTATAGGGACTAAGATTATAAAATTCTTATAAATTATGCCAGCCAGTTGCCAAA |
| Clostridium<br>phytofermentans ISDg                        | CP000885.1     | 1913586-1913673 | CAACGATAATAGCAAACCTAGTGAAAAGCTAGCGACGCAAAGCTATAGGGTCTTCCTTAGATATTCTAAGATGATAGCCAGTTACCGAA      |
| Clostridium<br>phytofermentans ISDg                        | CP000885.1     | 1430070-1430158 | TTATAAATTTAGCAAACCTAATTGAAAGATTAGGACGCAAAGCTATGGGTCTAAGGATATCATAATATCAACGATTGCCAGGTTACAGAA     |
| Clostridium ramosum DSM<br>1402<br>C_ramosum-2.0.1_Cont104 | ABFX02000002.1 | 244990-244905   | TCATAAATATGGCAAACCTCTTTGAAAAAAGAAGTACGCAAAGCTATAGGGCCTTCATCAATTATGATATGGCAGCCAGTTGCATTC        |
| Clostridium saccharolyticum<br>WM1                         | CP002109.1     | 3771078-3770990 | ATAAGCCAAGGGCAAACCCGGCAAAAGCCGGGGACGCAAAGCCGAGGGTCTAAGGTGTCTTAGGACGCTATGATAGTCTGGCTGCTGAC      |
| Clostridium saccharolyticum<br>WM1                         | CP002109.1     | 1527906-1527991 | ATAAGTCAAAGGAAAACCTGTTAAAAAAGGGACGCAAAGCCGAAGGTCTAAGGCGTTTCTTGTAAGTCTGTTGCCCAGTTGTCAGA         |
| Clostridium saccharolyticum<br>WM1                         | CP002109.1     | 1872800-1872887 | TTGAATTAAGGGCAAACCCATCTAAAGATGGGGACGCAAAGCCGAGGGTCTAAGGCGCACATTGTGCTATGATAGTCTGGCTGCAAAA       |
| Clostridium saccharolyticum<br>WM1                         | CP002109.1     | 2969431-2969517 | TAATTTTAAGGGCAAACCTTGCCGAAAGACAAGGACGTAAAGCCAAGGGTCTAAGATGTGAATGCATTATGATAGCCTGGCTGCCGTT       |
| Clostridium saccharolyticum<br>WM1                         | CP002109.1     | 3799466-3799379 | TTGAATTAAGGGCAAACCCATCAAAAGATGGGGACGCAAAGCCGAGGGTCTAAGGCGCACATTGTGCTATGATAGTCTGGCTGCAAAA       |
| Clostridium saccharolyticum<br>WM1                         | CP002109.1     | 3784391-3784303 | ATAAGCTATGGGCAAACCCGGCAAAAGCCGGGGACGCAAAGCCGAGGGTCTAAGGTGTCTTAGGACGCTATGATAGTCTGGCTGCTGAC      |
| Clostridium saccharolyticum<br>WM1                         | CP002109.1     | 3402847-3402933 | TCCGACAAAGGGCAAACCTTGCCGAAAGGTAAGGACGCAAAGCCGAGGGTCTAAAGTGCGAGAGCATTATGACAGTCTGGCTGCCGTA       |
| Clostridium sp. 7_2_43FAA<br>cont1.6                       | ACDK01000006.1 | 9767-9850       | AAATTAATAGGCAAACCTTAGAGAAATTTAAGGACGCAAAGCTATAGGGACTAAGGTGTATAACTATGTCAGCCAGTTGCCAAA           |
| Clostridium sp. 7_3_54FAA                                  | ACWK01000098.1 | 37547-37629     | TATTATATTGGCAAACCCGTCGAAAGGCGGTGGCGCAAAGCTAAAGGGTCTAAGTAGAAGTATATGACAGCCAGTTGCAATC             |

|                                                                |                |                 |                                                                                               |
|----------------------------------------------------------------|----------------|-----------------|-----------------------------------------------------------------------------------------------|
| cont1.98                                                       |                |                 |                                                                                               |
| Clostridium sp. DL-VIII<br>CDLVIIIIscaffold_1_Cont1            | AFWX01000001.1 | 1668071-1668159 | TGATGTTAATAGCATACTTATCGAAAGGTAAGGACGCAAAGCTTTGAGTCTAAGGGAAAGTTTTTCTATGATCGTCAGGTTGCCAAA       |
| Clostridium sp. DL-VIII<br>CDLVIIIIscaffold_1_Cont2            | AFWX01000002.1 | 1635028-1634940 | AAATGTAAATAGCAAATTCATTGAAAGGTGAAGACGCAAAGCCATGAGTCTAAAGTAATTTTCGATTGCCATGATAGTCAGGTTGCCAAA    |
| Clostridium sp. DL-VIII<br>CDLVIIIIscaffold_1_Cont2            | AFWX01000002.1 | 2302511-2302425 | TATTGATAATAGTACACTTATTGAAAGGTAAGGTCACAAAGCCATGGGTCTAAGGAATGTTATGTCTATGATTGCCAGGCTACTAAG       |
| Clostridium sp. SS2/1<br>Clostridium_sp_SS21-1.0.1_<br>Cont764 | ABGC03000028.1 | 1552-1465       | TTATTCATAGGGCAAACCTGTTGAAAGACAGGGACGCAAAGCCAGAAGGGTCTAAGGTCTTATTGGACTATGACAGCCGGTTGCCACA      |
| Clostridium sp. SS2/1<br>Clostridium_sp_SS21-1.0.1_<br>Cont879 | ABGC03000034.1 | 274477-274387   | TTATTTTAAAGGCAAACCTGTTGAAAAGCAGGGGCGCAAAGCCAGAAGGGACTAAAGTCAGAAAGCTTGACCATGTCAGCCGGTTGCCACT   |
| Clostridium sp. SS2/1<br>Clostridium_sp_SS21-1.0.1_<br>Cont916 | ABGC03000042.1 | 79558-79633     | AAAGATTCTAGGCAAAACAGACGAAAGTCTGTGACGCAAAGCTAAAGGGCCTGTAAAATGGCAGCCAGTTGCAGAA                  |
| Clostridium sp. SY8519<br>DNA                                  | AP012212.1     | 1618715-1618640 | TGCTGATCATGGCAAAACAGATGAAAATCTGTGACGCAAAGCTGCAGGGTCTTTGTCATGGCAGCCAGTTGCGCTT                  |
| Clostridium sticklandii str.<br>DSM 519 chromosome             | FP565809.1     | 1005537-1005454 | TCACGACAATGGCAAAGTAGTAGAAATGCTATGACGCAAAGCTATAGGGCCTTACCGTAACTGGTTGGCAGCCTAGCTACCGAA          |
| Clostridium sticklandii str.<br>DSM 519 chromosome             | FP565809.1     | 513404-513496   | GTATGAAAAAGGCAAACTACAGGAAACTGTAGGACGCAAAGCGAGGAGTCTAAGACTGAATACTAACTCAGTTATGATAGTCCAGCCGCCATA |
| Clostridium sticklandii str.<br>DSM 519 chromosome             | FP565809.1     | 515076-515164   | TAATGAAAAAGGCAAACTATGGGAAACTGTAGGACGCAAAGCAAGGAGTCTAAAGCTTAGTTTAAAGCAATGATAGTCCAGCCGCCATA     |
| Clostridium symbiosum                                          | ADLQ01000045.1 | 19424-19506     | TATTATATTGGCAAACCCGTCGAAAGGCGGTGGCGCAAAGCTAAAGGGTCTAAGTAGAAGTATATGACAGCCAGTTGCAATC            |

|                                               |                |                 |                                                                                                  |
|-----------------------------------------------|----------------|-----------------|--------------------------------------------------------------------------------------------------|
| WAL-14163 cont1.45                            |                |                 |                                                                                                  |
| Clostridium symbiosum<br>WAL-14673 cont1.40   | ADLR01000040.1 | 5906-5988       | TATTATATTTGGCAAACCCGTCGAAAGGCGGTGGCGCAAAGCTAAAGGGTCTAAGTAGAAGTATATGACAGCCAGTTGCAATC              |
| Clostridium tetani E88                        | AE015927.1     | 477013-477088   | CCACGATAAAGGCAAACTATTGAAAGATAGTGACGCAAAGCTATAGGGTCTGTAAAATGACAGCCAGTTATCGAA                      |
| Clostridium thermocellum<br>ATCC 27405        | CP000568.1     | 1772116-1772199 | ACATTACAAAGGCAAACCCATCAAAGATGGCGACGCAAAGCTAAAGGGGCTAAAGCATTATGCCATGCCAGCCAGTTGCAATG              |
| Clostridium thermocellum<br>ATCC 27405        | CP000568.1     | 3637613-3637528 | TTTTGAAAAGGGCAAATCTATCGAAAGATAGAGACGCAAAGCCAACGAGTCTAAGGTGGAAACACTATGACGGTCGGGTTGCCAAA           |
| Clostridium thermocellum<br>ATCC 27405        | CP000568.1     | 1273271-1273368 | TATGAAACAGGGCAAATCATCGAAAGGTGATGACGCAAAGCCATGGGTCTACTGTTTTAAACAATGTTTTAAAGCTATGATCGCCAGGCTGCCATT |
| Clostridium thermocellum<br>ATCC 27405        | CP000568.1     | 3637352-3637262 | TTTCGACAAAGGCAAACTCAATGAAAATTGAGGACGCAAAGCTCCAGGTCTTCGGTTTGGTATTCCAAACCATGACGGCTGAGTTACCGAA      |
| Clostridium thermocellum<br>DSM 1313          | CP002416.1     | 719109-719024   | TTTTGAAAAGGGCAAATCTATCGAAAGATAGAGACGCAAAGCCAACGAGTCTAAGGTGGAAACACTATGACGGTCGGGTTGCCAAA           |
| Clostridium thermocellum<br>DSM 1313          | CP002416.1     | 1366547-1366450 | TATGAAACAGGGCAAATCACCGAAAGGTGATGACGCAAAGCCATGGGTCTACTGTTTTAAACAATGTTTTAAAGCTATGATCGCCAGGCTGCCATT |
| Clostridium thermocellum<br>DSM 1313          | CP002416.1     | 718848-718758   | TTTCGACAAAGGCAAACTCAATGAAAATTGAGGACGCAAAGCTCCAGGTCTTCGGTTTGGTATTCCAAACCATGACGGCTGAGTTACCGAA      |
| Clostridium thermocellum<br>DSM 1313          | CP002416.1     | 923160-923077   | ACATTACAAAGGCAAACCCATCAAAGATGGCGACGCAAAGCTAAAGGGGCTAAAGCATTATGCCATGCCAGCCAGTTGCAATG              |
| Clostridium thermocellum<br>DSM 2360 ctg00038 | ACVX01000002.1 | 111354-111451   | TATGAAACAGGGCAAATCACCGAAAGGTGATGACGCAAAGCCATGGGTCTACTGTTTTAAACAATGTTTTAAAGCTATGATCGCCAGGCTGCCATT |
| Clostridium thermocellum<br>DSM 2360 ctg00048 | ACVX01000041.1 | 17586-17669     | ACATTACAAAGGCAAACCCATCAAAGATGGCGACGCAAAGCTAAAGGGGCTAAAGCATTATGCCATGCCAGCCAGTTGCAATG              |
| Clostridium thermocellum                      | ACVX01000049.1 | 8906-8996       | TTTCGACAAAGGCAAACTCAATGAAAATTGAGGACGCAAAGCTCCAGGTCTTCGGTTTGGTATTCCAAACCATGACGGCTGAGTTACCGAA      |

|                                               |                |                 |                                                                                                  |
|-----------------------------------------------|----------------|-----------------|--------------------------------------------------------------------------------------------------|
| DSM 2360 ctg00052                             |                |                 |                                                                                                  |
| Clostridium thermocellum<br>DSM 2360 ctg00052 | ACVX01000049.1 | 8645-8730       | TTTGTAAAAGGGCAAATCTATCGAAAGATAGAGACGCAAAGCCAACGAGTCTAAGGTGGAAACACTATGACGGTCGGGTTGCCAAA           |
| Clostridium thermocellum<br>JW20 ctg299       | ABVG02000001.1 | 31537-31447     | TTTCGACAAAAGGCAAACTCAATGAAAATTGAGGACGCAAAGCTCCAGGTCTTCGGTTTGGTATTCCAAACCATGACGGCTGAGTTACCGAA     |
| Clostridium thermocellum<br>JW20 ctg299       | ABVG02000001.1 | 31798-31713     | TTTTGAAAAGGGCAAATCTATCGAAAGATAGAGACGCAAAGCCAACGAGTCTAAGGTGGAAACACTATGACGGTCGGGTTGCCAAA           |
| Clostridium thermocellum<br>JW20 ctg299       | ABVG02000001.1 | 1525336-1525433 | TATGAAACAGGGCAAATCATCGAAAGGTGATGACGCAAAGCCATGGGTCTACTGTTTTAAACAATGTTTTAAAGCTATGATCGCCAGGCTGCCATT |
| Clostridium thermocellum<br>JW20 ctg299       | ABVG02000001.1 | 1978266-1978349 | ACATTACAAAGGCAAACCCATCAAAAGATGGCGACGCAAAGCTAAAGGGGCTAAAGCATTATGCCATGCCAGCCAGTTGCAATG             |
|                                               |                |                 |                                                                                                  |
| Colwellia psychrerythraea<br>34H              | CP000083.1     | 807375-807459   | AATTGAAAAGAGCAAACTTTTCGAAAGAAAGTGGCGCAAAGTCACCGGTCTACGGGAATAATTCTACGACAGCGGAACTGCCAAC            |
| Colwellia psychrerythraea<br>34H              | CP000083.1     | 4612611-4612693 | GCTTGATAAGGGCAAATCTAATGAAAGTTAGAGACGCAAAGTTACCGGTCTAATGGGAAACCTATGATAGCGGGACTGCAAAT              |
| Colwellia psychrerythraea<br>34H              | CP000083.1     | 1642525-1642430 | ACAAAGAAAAGGCAAAGCACGCGAAAACGTGTTACGCAAAACCACCGGTCTAAGGGTAAAGTTTAATTATTTATCTATGACAGCGGAGTCACCTCG |
|                                               |                |                 |                                                                                                  |
| Compost metagenome<br>contig09248             | ADGO01009203.1 | 510-424         | AATTGTCAAGGGCAAACCCGTCGAAAGACGGGGACGCAAAGCCTCCGATCTTCCGGGTACACACCCAAAGACAGCGGGGCTGCCAAA          |
| Compost metagenome<br>contig09410             | ADGO01009365.1 | 22-111          | CACTGCTCAGGGCAAACCCGTCGAAAGGCGGGGACGCAAAGCTTCCGGTCTAAGGGTCGCTCCGGCGACCACGATAGCGGGGCTGCCAGG       |
| Compost metagenome<br>contig09783             | ADGO01009737.1 | 332-253         | CGGTGCCAAAGGCAAACCCACGCGAGGTGGTGACGCAAAGCCACGGGTCTTCCCGACGGAAGACAGCCGGGCTGCCACC                  |



|                        |            |                |           |                                                                                                       |
|------------------------|------------|----------------|-----------|-------------------------------------------------------------------------------------------------------|
| Compost<br>contig10756 | metagenome | ADGO01010708.1 | 491-407   | CGCGTCGAAGGGCAAACCTGCCGCAAGGCGGGACGCAAAGCCTCCGGTCCCGGTGGTCGCTTCCGGGATAGCGGGGTGCGGGG                   |
| Compost<br>contig15785 | metagenome | ADGO01015725.1 | 238-333   | AACTGCTAAAGGCAAACCCGTCGAAAGGCGGGACGCAAAGCCACCGGTCTAAGGGGAGCTCGGATACCGAGCTGCCACGATAGCGGGGTGCCAGG       |
| Compost<br>contig18000 | metagenome | ADGO01017929.1 | 447-364   | CGCTGACAAGGGCACACCTTTCGAAAGAAAGGGCCGCAAAGCCACCGGTCTAAGGGGATTTCCTATGACAGCGGGGTACCAGC                   |
| Compost<br>contig21071 | metagenome | ADGO01020994.1 | 1911-1830 | TTTTGCTAAGGGCAAACCCATCGACAGGTGGGGACGCAAAGCCATCCGGTCCTTCTTTCGAGAAGGAAAGCGAGGCTGCCGAA                   |
| Compost<br>contig23786 | metagenome | ADGO01023703.1 | 1993-1907 | AATTGTCAAGGGCAAACCCGTCGAAAGACGGGGACGCAAAGCCTCCGATCTTCCGGGTGAATACCCAAAGACAGCGGGGTGCCAAG                |
| Compost<br>contig30245 | metagenome | ADGO01030145.1 | 398-312   | CGAGCTCAAGGGCAAACCTCGTCGAAAGGCGAGGACGCAAAGCTTCCGGTCTAACGGAGATTTCTCCCAAGACAGCGGGGTGCGCTCA              |
| Compost<br>contig32980 | metagenome | ADGO01032870.1 | 448-362   | GCGAGCTCAGGGCAAACCTCGCCGAAAGGCGGGGACGCAAAGCTTCCGGTCTAACGGAGATCTCTCCTAAGACAGCGGGGTGCCACA               |
| Compost<br>contig34365 | metagenome | ADGO01034251.1 | 177-273   | CGTCGACAAGGGCAAAGCCGTCGTAAGGCGGTGACGCAAAGCCTCCGGTCCTTTACGCCGCTCGCGGTTGAAAAGGGGATAGCGGGGTCCCGCT        |
| Compost<br>contig38268 | metagenome | ADGO01038152.1 | 352-267   | GCGTGAAAAGGGCAAACCCGTCGAAAGACGGGGACGCAAAGCCACCGGTCTAACGGACGAGGTCCTATGACGGCGGGGTGCCACG                 |
| Compost<br>contig39546 | metagenome | ADGO01039427.1 | 398-301   | CACTGCTAAAGGCAAACCCGTCGAAAGCGGGACGCAAAGCCACCGGTCTAAGGTCGCTCTCGGGGTACTGAGGCGATCACGATAGCGGGGTGCCAG<br>G |
| Compost<br>contig42419 | metagenome | ADGO01042296.1 | 256-173   | ACGTGAAAAGGGCAAACCCGCCGAAAGGCGGGGACGCAAAGCCACCGGTCTACGGCGAGGAGCTATGACAGCGGGGTGCCACG                   |
| Compost<br>contig44784 | metagenome | ADGO01044656.1 | 301-390   | CATCGAGATCGGCAAACCCGTCGCAAGTCGGGGACGCAAAGCCTCCGGTCCGAGAGCAGAGTCGGCTCTCGTGATAGCGGGGTGCCAGC             |
| Compost                | metagenome | ADGO01047296.1 | 215-289   | GCTCGTGAAAGGCAAACCTCGTCGCAAGGCGAGGACGCAAACCTCCGGTCTTTCAGAGATAGCGGGGTGCCGCC                            |

|                                      |                |           |                                                                                                          |
|--------------------------------------|----------------|-----------|----------------------------------------------------------------------------------------------------------|
| contig47429                          |                |           |                                                                                                          |
| Compost metagenome<br>contig48987    | ADGO01048849.1 | 1114-1215 | GTCGAACAAGGGCAAACCACCGCAAGGTGGTGACGCAAAGCCTCCGGTCCGTTCGCTAGATGTGCACTCGTGAAGCACACCGGATAGCGGGGTTG<br>CCGCG |
| Compost metagenome<br>contig53246    | ADGO01053096.1 | 238-332   | GTCGAACAAGGGCAAAGCCGTCGAAAGGCGGGACGCAAAGCTTCCGGTCTCGGCCGACTCGCAACAGTCGGCACGGATAGCGGGGTTGCCGCG            |
| Compost metagenome<br>contig57478    | ADGO01057323.1 | 186-272   | AATTGAACAGGGCAAACCCGTCGAAAGGCGGGACGCAAAGCCACCGGTCTACGAGACGAATGTCTTACGACAGCGGGGTTGCCAAT                   |
| Compost metagenome<br>contig60023    | ADGO01059865.1 | 46-128    | GCTAAGCAAAGGCAAACCTCACTGAAAAGTGGGGACGCAAAGCCACCGGTCTAAAGGGCTTCTAAGACAGCGGGGTTGCCAAG                      |
| Compost metagenome<br>contig60269    | ADGO01060111.1 | 255-161   | CGAACGCGAGGGCAAACCCGTCGCGAGGCGGGGACGCAAACCTTCCGGTCTCGGCATGTTCTGTCGCTTGATGCCGAGATAGCGGGGTCGCCGCC          |
| Compost metagenome<br>contig61860    | ADGO01061699.1 | 82-168    | CGGACGCAAAGGCAAACCCACCGAAAGGTGGGGCGCAAACCTTCCGGTCTAACGGCTGAAAGGCCAGGACAGCGGGGTTGCCGGG                    |
| Compost metagenome<br>FHNL2OP03Q1TLP | ADGO01094978.1 | 72-1      | CGACACGAAGGGCAAACCCGCCGTGAGGCGGGGACGCAAAGCCTCCGGTCTTCGTGCCGAAGATAGCGGGGT                                 |
| Compost metagenome<br>FHNL2OP03Q42V9 | ADGO01114571.1 | 201-118   | AACTGATCAAGGCACACTCTTCGAAAGAAGGGGCCGCAAAGCCACCGGTCTAAGGGGATCTCCTATGACAGCGGGGTTGCCAGC                     |
| Compost metagenome<br>FHNL2OP03Q4P0S | ADGO01080467.1 | 313-228   | ATTGAAAACGGGCAAACCCGTCGAAAGGCGGGACGCAAAGCCTCCGGTCTACGGGATCCACATCCTATGACAGCGGGGTTGCCACA                   |
| Compost metagenome<br>FHNL2OP03Q8CX0 | ADGO01109231.1 | 385-473   | CGTCTGCAGGGGCAAATTCGTCGAAAGGCGAAGACGCAAAGCCGCGGGCCTGAAGCTCGATCGAGAGCGATGGCAGCCGGGCCGCCAGA                |
| Compost metagenome<br>FHNL2OP03QJ2T7 | ADGO01117420.1 | 298-211   | AACAGATAAAGGCAAACCTATTGAAAAATTGGGACGCAAAGTCACAGGTCTAATGTATCGTACATACTATGACGGCTGGACTGCCTGG                 |
| Compost metagenome<br>FHNL2OP03QK2Q1 | ADGO01108465.1 | 424-499   | GCAATCCGAGGGCAAACCCACCAAAAGGTGGGGCGCAAAGCTTCCGGTCTAAAGGAGAGATCCCATGACAGCGGGG                             |

|                                      |                |         |                                                                                                   |
|--------------------------------------|----------------|---------|---------------------------------------------------------------------------------------------------|
| Compost metagenome<br>FHNL2OP03R4P5H | ADGO01101996.1 | 100-182 | CAATTGAAAGGGCAAACCTTGCCGAAAGGCAAGGGCGCAAAGCCACAGGCCTAAGGGATTACCTATGGCAGCTGGGTTGCCGAA              |
| Compost metagenome<br>FHNL2OP03RFVLV | ADGO01131224.1 | 198-114 | GGCACCGAAGGGCAAACCCGCCGTGAGGTGGGGACGCAAAGCCTCCGGTCTTCAGCCTATCTCTGAAGATAGCGGGGTTGCCGAA             |
| Compost metagenome<br>FHNL2OP03RRNLR | ADGO01084780.1 | 372-276 | GCGGCCAGTGGGCAAACCCATCGAAAGGTGGGACGCAAAGCCACCGGTCTAAGGGCGGGAATCTGAGTGCAAAGCCTAGGATAGCGGGGCTGCCGAA |
| Compost metagenome<br>FHNL2OP03RSZI1 | ADGO01080028.1 | 491-440 | GACGCAAAGCCACCGGTCTAACGGAGCTTCCTAAGACAGCGGGGTTGCCAGC                                              |
| Compost metagenome<br>FHNL2OP03RT805 | ADGO01092221.1 | 481-395 | GAGCTGACAAGGCAAAGCCGCCGAAAGGCGGCGACGCAAACCACCGGTCTACGGGGAGTCGCCCTACGATAGCGGGGTTGCCAGC             |
| Compost metagenome<br>FHNL2OP04X0ZJR | ADGO01176494.1 | 302-390 | CTACGTCAAGGGCAAACCCGTGCGAAAGTCGGGGACGCAAAGCCACCGGTCTAAAAAGGGCGCAAGCCTTCAGACAGCGGGGCTGCCAAA        |
| Compost metagenome<br>FHNL2OP04XU6ZK | ADGO01203309.1 | 19-105  | AATTTGAAAAGGCAAACCTCATTTGAAAAATGGGGACGCAAAGCCACCGGTCTAAGGTTTGAAAAAACTATGATAGCCGGGTTGCCGAA         |
| Compost metagenome<br>FHNL2OP04Y53EU | ADGO01167617.1 | 243-151 | CGCTGCTCAGAGCAAACCTCGCGAAAGCGGGGGGCGCAGAGCTTCGGGGCTACAGCCGGCGCAAGCCGATGCCACGCCAGCCGGGCCGCCAGC     |
| Compost metagenome<br>FHNL2OP04Y5FV7 | ADGO01170350.1 | 2-79    | AAGGGCAAACCTCGTCGAGAGGCGAGGACGCAAAGCTTCCGGTCCGGACGTTGCGGTCCGAGATAGCGGGGTTGCCGGT                   |
| Compost metagenome<br>FHNL2OP04Y5JTI | ADGO01180502.1 | 408-316 | ATTGAATAAAGGCAAACCTCATCGAAAGGTGAGGACGCAAAGCCACAGGTCTAAAGTAATTCTTCGGAATTACTATGACGGCTGGGTTGCTGAG    |
| Compost metagenome<br>FHNL2OP04YIMPF | ADGO01167563.1 | 227-316 | TGCTGCCAAGAGCAAAGCCGCTGAAAGGCGGTGGCGCAGAGCTAAGGGGCTACCGCGGTGAATGCCGCCATGCTCGCCTGGCCGCCAGC         |
| Compost metagenome<br>FHNL2OP04YRLMG | ADGO01171289.1 | 106-20  | AACTGAAAAAGGCAAACCTTATCGAAAGGTAGGGACGCAAAGCTACGAGTCTAAATCCTATTGGGTAAAGATAGTCGGGTTGCCAAT           |
| Compost metagenome                   | ADGO01162073.1 | 9-95    | GGCTGCTAAGGGTAAACCTGGCGAAAGCCAGCGACACAAAACCTCCGGTCTAAGGGACTTCCGTCTACGATAGCGGGGTTGCAGGC            |

|                                                           |                |                 |                                                                                              |
|-----------------------------------------------------------|----------------|-----------------|----------------------------------------------------------------------------------------------|
| FHNL2OP04YSHV2                                            |                |                 |                                                                                              |
| Compost metagenome<br>FHNL2OP04ZDDFH                      | ADGO01182347.1 | 453-503         | TCCGAACAAAGGCAAACCCACCGAAAGGTGGGACGCAAAGCCACCGGTCTA                                          |
|                                                           |                |                 |                                                                                              |
| Coprobacillus sp. 29_1<br>cont1.33                        | ADKX01000033.1 | 77622-77699     | TATAAAAATAGGCAAACTATTGAAAAGATAGTGACGCAAAGCTATAGGGCCTCTTTAACGTGGCAGCCAGTTGCACAA               |
| Coprobacillus sp. 29_1<br>cont1.39                        | ADKX01000039.1 | 155454-155538   | ATATGTAAATAGCAAACTATTGAAAAATAGTGACGCAAAGCTATAGGGTCTAATCTCATATGAGAATGACAGCCAGTTGCCAAT         |
| Coprobacillus sp. 29_1<br>cont1.41                        | ADKX01000041.1 | 89095-89010     | ATATGTAAATAGCAAGCCCATTGAAAAATGGAGTACGCAAAGCTATAGGGTCTAAGCTTGTGTAAGTAGGATAGCCAGTTGCCAAT       |
| Coprobacillus sp. D7<br>cont1.177                         | ACDT01000177.1 | 506-591         | TCATAAATATGGCAAACTCTTTGAAAAAAGAAGTACGCAAAGCTATAGGGCCTTCATCAATTATGATATGGCAGCCAGTTGCATTC       |
|                                                           |                |                 |                                                                                              |
| Coprococcus catus GD/7<br>draft genome.                   | FP929038.1     | 3189627-3189717 | TAAGGAAAACGGCAAACCAGATGAAAGTCTGGGACGCAAAGCCAGAAGAGGCTAAAGTCAGAAAAGTTTGACCAGGTCAGCCGGTTGCAACT |
| Coprococcus catus GD/7<br>draft genome.                   | FP929038.1     | 3107441-3107515 | AAGATTCGTCGGCAAATCAGTCGAAAGGCTGAGACGCAAAGCTATAGGGTCTGTAAAATGACAGCAAATGCATT                   |
| Coprococcus catus GD/7<br>draft genome.                   | FP929038.1     | 1519054-1519139 | TATTTATAGGGGCAGAGCTGTCGAAAGGCAGTGACGCAAAGCCAAAGGGACTAAGGTGTTAGAACTATGTCAGCCGGTTGCGATA        |
| Coprococcus catus GD/7<br>draft genome.                   | FP929038.1     | 3205275-3205350 | TAAGGAAATCGGCAAACCAGATGAAAGTCTGGGACGCAAAGCTACAGGGCCTGTAAAATGGCAGCCAGTTGCATAA                 |
| Coprococcus comes ATCC<br>27758<br>C_comes-1.0.1_Cont2257 | ABVR01000028.1 | 31655-31572     | TGTTTATAGGGGCAAAGCTGTTGAAAACTGTGACGCAAAGCCAAAGGGACTAAGGCAGTACGCTATGTCAGCCGGTTGCAATA          |
| Coprococcus comes ATCC                                    | ABVR01000042.1 | 89198-89123     | TAAGGAAAACGGCAAACAGATCAAAGTCTGCGACGCAAAGCTATAGTGCCTGTAAAATGGTAGCCAGTTGCCACG                  |

|                                                                                                     |                |                 |                                                                                                             |
|-----------------------------------------------------------------------------------------------------|----------------|-----------------|-------------------------------------------------------------------------------------------------------------|
| 27758<br>C_comes-1.0.1_Cont2289                                                                     |                |                 |                                                                                                             |
| Coprococcus comes ATCC<br>27758<br>C_comes-1.0.1_Cont2289                                           | ABVR01000042.1 | 56233-56143     | TTATTTTAAAGGCAAACCTGTTGAAAGGCAGGAGCGCAAAGCCAGAAGGGACTAAAGTCAGAAAGCTTGACCATGTCAGCCGGTTGCCACT                 |
| Coprococcus sp. ART55/1<br>draft genome.                                                            | FP929039.1     | 120750-120648   | ATAAATATTTAGTAAACCCGTTGAAAAGCGGTGACACAAAGCCATATGGGTCTAAGGTCTGAAAACAGAGAACTGTTTCGGACTATGACAGCCGGTTGC<br>AGTA |
| Coriobacteriaceae bacterium<br>JC110                                                                | CAEM01000034.1 | 24791-24864     | TTTTCGAATCGGCAAAATCATCGAAAGGTGATGACGCAAAGCTATAGGGCCTGAAATGGCAGCCAGTTGCACAG                                  |
| Culex pipiens<br>quinquefasciatus                                                                   | AC167560.3     | 117624-117709   | GTAGTCATTTGGCAAACCTGGTTGAAAGGCCAGGACGCAAAGCCTCCGGTCTAAAGACATGTCGTCCAGGATAGCGGGGTTGCCACA                     |
| Culex pipiens<br>quinquefasciatus                                                                   | AC167664.4     | 1129-1044       | GTAGTCATTTGGCAAACCTGGTTGAAAGGCCAGGACGCAAAGCCTCCGGTCTAAAGACATGTCGTCCAGGATAGCGGGGTTGCCACA                     |
| Culex pipiens<br>quinquefasciatus                                                                   | AC167663.3     | 117631-117716   | GTAGTCATTTGGCAAACCTGGTTGAAAGGCCAGGACGCAAAGCCTCCGGTCTAAAGACATGTCGTCCAGGATAGCGGGGTTGCCACA                     |
| Curvibacter putative<br>symbiont of Hydra<br>magnipapillata genomic<br>scaffold<br>HmaUn_WGA69518_1 | FN543104.1     | 1410700-1410616 | AGTGCTTATGGGTAAACCCGTTGAAAGACGGGGACACAAAGCCACCGACCTACAGCATCAATGCCATGGTAGCGGGGCCGCAAT                        |
| Cyanothece sp. PCC 7425                                                                             | CP001344.1     | 107070-106982   | GTCCCGAAAAGGCAACTTGCTCCGAAAGGGTAAGACGCAAATTGGTAATCCTGTAGCCAGGGTGTCGGTATGGATGTGTCAATGCCGAA                   |

|                                                   |                |                 |                                                                                                  |
|---------------------------------------------------|----------------|-----------------|--------------------------------------------------------------------------------------------------|
| Cyanothece sp. PCC 7425                           | CP001344.1     | 3682885-3682978 | CCCCGAAAATGGCAAGTTATTCCGAAAGGGTAATACGCAAATCCGAGATCCTGAAGCCACTCTTCCAGGGGTATGGACGTCTCTGATGCCGAA    |
| Cyanothece sp. PCC 7425                           | CP001344.1     | 5088371-5088464 | GTCCCGAAAAGGCAACTTGCTCCGAAAGGGTAAGGCGCAAATTAGTGGTCCTGTAGCCAGAGTTAGGTGTCGGTATGGATGTGCTAATGCCGAA   |
| Cyanothece sp. PCC 7425                           | CP001344.1     | 2022506-2022600 | GTCCCGAAAAGGCAACTTGTTCCGAAAGGACAAGACGCAAATTAGGAGTCCTGTAGCCAACCTTTGATTGCGGTATGGACAGCTAATGCCGAA    |
| Cyanothece sp. PCC 7425<br>plasmid pP742501       | CP001345.1     | 191915-191827   | GTCCCGAAAAGGCAACTTACTCCGAAAGGGTAAGGCGCAAATTGGTAATCCTGTAGCCAAGGTGCCGGTATGGATGTGCCAATGCCGAA        |
| Cyanothece sp. PCC 7425<br>plasmid pP742501       | CP001345.1     | 189896-189808   | GTCCCGAAAAGGCAACTTACTCCGAAAGGGTAAGGCGCAAATTGGTAATCCTGTAGCCAAGGTGCCGGTATGGATGTGCCAATGCCGAA        |
| Cyanothece sp. PCC 7425<br>plasmid pP742501       | CP001345.1     | 193383-193295   | GTCCCGAAAAGCAACTTACTCCGAAAGGGTAGGGCGCAAATTGGTAAGCCTGCAGCCAGGGTATCGGTATGGCTGTGCCAATGCCGAA         |
| Cyanothece sp. PCC 7425<br>plasmid pP742502       | CP001346.1     | 134259-134171   | GTCCCGAAAAGGCAACTTGCTCCGAAAGGGTAAGACGCAAATTGGTAATCCTGTAGCCAAGGTGTCGGTATGGATGTGCCAATGCCGAA        |
| Cyanothece sp. PCC 7425<br>plasmid pP742502       | CP001346.1     | 31148-31236     | GTCCCGAAAAGGCAACTTGCTCCGAAAGGGTAAGACGCAAATTGGTAATCCTGCAGCCAGGGTGTCGGTATGGATGTGCAATGCCGAA         |
|                                                   |                |                 |                                                                                                  |
| Daphnia pulex<br>DAPPUcaffold_11575_Con<br>t18181 | ACJG01018181.1 | 934-1025        | ATGTGACAAAGGCAAACCACTCGAGAGGGTGGGACGCAAAGCCAAGGGACCTAACGAGGGACACATGTTCCAGGGTCAGCCTAGCCGCCACA     |
|                                                   |                |                 |                                                                                                  |
| Dechlorosoma suillum PS<br>ctg77                  | ADDK02000002.1 | 364061-364156   | CATTGATAAAGGCAAACCCGTACGAAAGGCGGGGGCGCAAAGTCACCGGTCTACCGGGCGTCGGCAAGGGCGCTCCATGACGGCGGGACTGCCATA |
|                                                   |                |                 |                                                                                                  |
| Deinococcus deserti<br>VCD115 plasmid 1           | CP001115.1     | 26820-26745     | AACCGAAAAAGGCAAATCCGCCGCGAGACGGAGACGCAAAGCTACCGGGACCCACGAGGTCGGCCGAGTTACCGAA                     |
| Deinococcus deserti<br>VCD115 plasmid 1           | CP001115.1     | 240205-240130   | CACCGAAAAAGGCAAACCCGTGCGGAGGCGGGGACGCAAAGCTCCCGGGACCCCTGAGGTGCGCCGAGCTACCGAA                     |

|                                                      |                |                 |                                                                                                              |
|------------------------------------------------------|----------------|-----------------|--------------------------------------------------------------------------------------------------------------|
| Deinococcus deserti<br>VCD115 plasmid 1              | CP001115.1     | 217020-216945   | AACCGAAAAAGGCAAATCCGCCGCGAGACGGAGACGCAAAGCTACCGGGACCCACGAGGTCGGCCGAGTTACCGAA                                 |
| Deinococcus maricopensis<br>DSM 21211                | CP002454.1     | 420719-420644   | CACACGAACAGGCAACCCCGTCGCAAGGCGGTGACGCAAAGCCAACGGGACCCACGCGGTTCGGCCGGGTACCGAA                                 |
| Deinococcus proteolyticus<br>MRP plasmid pDEIPR03    | CP002539.1     | 70077-69973     | TCTCGACAAAGGCAAACCTCCGCGAGGGGGGACGCAAAGCCCACGGAACCTCCGCTGCTCCGCTCTTCTCTCAGGGCAGCACGGAAGTTGGCCGGG<br>CCACCGAA |
|                                                      |                |                 |                                                                                                              |
| Delftia acidovorans SPH-1                            | CP000884.1     | 4023666-4023571 | TTTGCGCACCAGCACACCCGTACGAAAGGCGGGGTGCGAAAGCCTCCGGTCTACCCCGCCCTTTGACGGGCGGGCATGACAGCGGGGTTGCCAGG              |
| Delta proteobacterium<br>NaphS2<br>ctg_1101087565953 | ADZZ01000720.1 | 9715-9635       | ATCTGAAAAAGCCAAACCTCAAGTAATTGAGGGACGGAAAGCCGCGGATCCTTACAACGCAAGGACAGCCGGGTTGCCTGG                            |
| Delta proteobacterium<br>NaphS2<br>ctg_1101087565953 | ADZZ01000720.1 | 12250-12158     | GTTCGAAAAAGGCAAACCACTCGAAAGGGTGGGACGCAAAGCCAGCGGCCTACGTCCTCAAATACCAAAGGATAAGGCGGCAGGGTTGCCGGG                |
| Delta proteobacterium<br>NaphS2<br>ctg_1101087565953 | ADZZ01000720.1 | 9107-9027       | ATCAGCAAAGGCCAAACCCCAAGCAATTGGGGGACGGAAAGCCACGGATCCTCAAAAAGCAAGGACAGCCGGGTTGCCTGG                            |
| Delta proteobacterium<br>NaphS2<br>ctg_1101087565963 | ADZZ01000513.1 | 780-856         | CAGAGATAAAGCTAAACCCGTCGTGAGGCGGGGACAGAAAGTTTCGGGTCTCAAAGGAAGGCGGCCGGGCTGCCTTA                                |
| Delta proteobacterium<br>NaphS2<br>ctg_1101087568010 | ADZZ01000749.1 | 84356-84436     | ACAGAAAAATGCCAAGCCCATCGTGAAGTGGGTACGGAAAGCCGCGAGCCCTTTTTTCAAGGGATAGTCGGGTTGCCTGT                             |
|                                                      |                |                 |                                                                                                              |
| Desulfarculus baarsii DSM                            | CP002085.1     | 3203430-3203341 | GGTGTGAAAGGGCAAACCCGCGCGAAAGCCGGGGGCGCAAAGTCACCGGCCTACAGCCGCCCGGGCGGCCACGGCGCGGGACTGCCAAC                    |

|                                         |            |                 |                                                                                                  |
|-----------------------------------------|------------|-----------------|--------------------------------------------------------------------------------------------------|
| 2075                                    |            |                 |                                                                                                  |
| Desulfatibacillum<br>alkenivorans AK-01 | CP001322.1 | 5865666-5865587 | AATTAGTTTTGCCAAACCGGTCGCGAGGCCGGGACGGAAAGCCACGGGTCTTGATCATAAAAGACAGCCGGGTTGCGCAT                 |
| Desulfatibacillum<br>alkenivorans AK-01 | CP001322.1 | 3523916-3523993 | TTTGTCTCAGCCAAACCTGTTGCAAAGCGGGGACGGAAAGCCACGGGTCCGCGTCCGCGGACAGCCGGGTTGCCTGC                    |
| Desulfatibacillum<br>alkenivorans AK-01 | CP001322.1 | 4141190-4141274 | GAAAGACAAAGCCAAACCTGCTGCGAGGCAGGGACGGAAAGCCACGGGTCCCATAAACAGACATGCGGATAGCCGGGTTACCATT            |
| Desulfatibacillum<br>alkenivorans AK-01 | CP001322.1 | 4141109-4141188 | GTCTCTTTTTGCCAAACCTGCCGCAAGGCAGGGACGGAAAGCTCCGGGTCCCCATGAGGGGGACGGCCGAGCCGCCGGC                  |
| Desulfitobacterium<br>hafniense DCB-2   | CP001336.1 | 3634475-3634381 | TGATGGTTGGAGCAAACCTTTGTGAAAGCAAAGGACGCTAAAGCTATGGGTCTAAGGCCGTCGCGCAAGACCGGCTAGGATCGCCAGGCTACAAGT |
| Desulfitobacterium<br>hafniense DCB-2   | CP001336.1 | 4958095-4958179 | TTGCGACAAAGGCAAACCTTAGTGAAAGCTAAGGACGCAAAGCTATGGGCCTTCCTGATCAAGCTGATGGCCGCCAAGCTACCGAA           |
| Desulfitobacterium<br>hafniense DCB-2   | CP001336.1 | 2632813-2632901 | TATAGCTATGGGCAAACCCGGTTAAAGCCGGGGACGCAAAGCCGAGGGTCTAAGGTGTCTTAGGACGCTATGATAGTCTGGCTGCTGAC        |
| Desulfitobacterium<br>hafniense DCB-2   | CP001336.1 | 2615723-2615811 | TAAAGCTATGGGCAAACCCGGCTAAAGCCGGGGACGCAAAGCCGAGGGTCTAAGGTGTCTTAGGACGCTATGATAGTCTGGCTGCTGAC        |
| Desulfitobacterium<br>hafniense DCB-2   | CP001336.1 | 1127881-1127794 | ATTCGACAATAGCAAACCTGGCGAAAGCCAGGGACGCAAAGCTATGGGTCTTCCTGGATACACTCCTGATGATCGCCAAGCTACCGAA         |
| Desulfitobacterium<br>hafniense Y51 DNA | AP008230.1 | 2621237-2621143 | TGATGGTTGGAGCAAACCTTTGTGAAAGCAAAGGACGCTAAAGCTATGGGTCTAAGGCCGTCGCGCAAGACCGGCTAGGATCGCCAGGCTACAAGT |
| Desulfitobacterium<br>hafniense Y51 DNA | AP008230.1 | 15633-15544     | TAGAGCCAAGGGCAAACCCGGTGAAAGCCGGGGGCGCAAAGCTACAGGGTCTACGGCATTTTCGGATGCTATGATAGCCTGGCTGCCAAA       |
| Desulfitobacterium<br>hafniense Y51 DNA | AP008230.1 | 4879337-4879424 | ATTCGACAATAGCAAACCTAGCGAAAGCCAGGGACGCAAAGCTATGGGTCTTCCTGGATACACTCCTGATGATCGCCAAGCTACCGAA         |



|                                                           |                |                 |                                                                                                      |
|-----------------------------------------------------------|----------------|-----------------|------------------------------------------------------------------------------------------------------|
| Desulfitobacterium<br>hafniense Y51 DNA                   | AP008230.1     | 5437254-5437338 | TTGCGACAAAGGCAAACCTTAGTGAAAGCTAAGGACGCAAAGCTATGGGCCTTCCTGATCAAGCTGATGGCCGCCAAGCTACCGAA               |
| Desulfitobacterium<br>hafniense Y51 DNA                   | AP008230.1     | 3900342-3900252 | TAAAATCAAGGGCAAACCGGCCTAAAGGTAGGGACGCAAAGCCGTAGGATTTAAGGTGCTCAAAAAGTGCTATGATAGCCTGGTTGCCAAA          |
| Desulfitobacterium<br>hafniense Y51 DNA                   | AP008230.1     | 5220217-5220127 | TAAAGTCAAGGGCAAACCTGCCTAAAGGCAGGGACGCAAACCGTAGGATCTAAGGTGCTTAAAGGTGCTATGATAGCCTGGTTGCCAAT            |
| Desulfitobacterium<br>metallireducens DSM 15288<br>ctg103 | AGJB01000012.1 | 86191-86109     | CAAAGAAAAAGGCAAACCCGTTGAAAAGCGGGGACGCAAAGCGATGGGTCTAAGGCTTTTGCTAAGACTGCCAAGCTGCCATA                  |
| Desulfitobacterium<br>metallireducens DSM 15288<br>ctg104 | AGJB01000010.1 | 48317-48229     | CATTTGTAAAGGCAAACCTCAGTGAAAGCCGAGGACGCAAAGCTACGAGTCTAAAGCCTCGGCAGAGGTAAAGATAGTCGGGTTGCCATG           |
| Desulfitobacterium<br>metallireducens DSM 15288<br>ctg107 | AGJB01000007.1 | 134456-134546   | TTCTGATAAAGGCAAAACATCTGAAAAGGTGTGACGCAAAGCCATGGGTCTACAGCAGGAAAGACACTGCCATGATCGCCAGGTTGCCGGA          |
| Desulfitobacterium<br>metallireducens DSM 15288<br>ctg111 | AGJB01000003.1 | 15355-15440     | CATCGACAAGAGCAAACCTTGGCGAAAGCCAAGGACGCAAAGCTATGGGTCTTCCAGAGTTCTTCTGATGACTGCCAAGCCACCGAA              |
| Desulfitobacterium<br>metallireducens DSM 15288<br>ctg111 | AGJB01000003.1 | 90831-90914     | CAATGACAAAGGCAAACCTGGCGAAAGTCAGGGACGCAAAGCTATGGGTCTGTCAGTGTGGCTGACGATTGCCAGGTCGCTAAT                 |
| Desulfitobacterium<br>metallireducens DSM 15288<br>ctg111 | AGJB01000003.1 | 240759-240842   | CAATGACAAGAGCAAACCTGGCGAAAGTCAGGGACGCAAAGCTATGGGTCTGTCAGTGTGGCTGACGATTGCCAGGTTACCAAA                 |
| Desulfitobacterium                                        | AGJB01000001.1 | 246363-246463   | ATTGTGTTGGGGTAAACCTTCGTGAAAGCGAAGGACGCTAAAGCTATGGGTCTACGGTTGATTACATGAGCAAACATCAGCTAAGATCGCCAAGCTACAA |

|                                        |                |                 |                                                                                       |
|----------------------------------------|----------------|-----------------|---------------------------------------------------------------------------------------|
| metallireducens DSM 15288<br>ctg113    |                |                 | GT                                                                                    |
|                                        |                |                 |                                                                                       |
| Desulfobacca acetoxidans<br>DSM 11109  | CP002629.1     | 903566-903641   | TCTGTAAGAAGCCACACCCCGGGCGACCGGGGGCCGAAAGCCGCGGGTCTCAGCAGAGACGGCCGGGTTGCCACC           |
| Desulfobacca acetoxidans<br>DSM 11109  | CP002629.1     | 900580-900658   | CCCTGATAAAGCCACACACCGGGCGACCGGGGGCCGAAAGCTACGGGTCTCACCAGAGACAGCCTTGTAGCTGCCAGG        |
| Desulfobacca acetoxidans<br>DSM 11109  | CP002629.1     | 901334-901409   | TCTGTAACAAGCCACACCCCGGGCGACCGGGGGCCGAAAGCCGCGGGTCTCAGCAGAGACGGCCGGGTTGCCACC           |
| Desulfobacca acetoxidans<br>DSM 11109  | CP002629.1     | 907011-907086   | CCGTGAAAAAACCACACCTCGGGCGACCGGGGGCCGAAAGCCGCGGGTCTCAAAGGAGATGGCCGGGTTGCCAGA           |
|                                        |                |                 |                                                                                       |
| Desulfobacter postgatei 2ac9<br>ctg440 | AGJR01000015.1 | 18301-18375     | AGACGACAAAGCCAAACCTGCCGAAAGACAGGCACGGAAAGGCGCGGTTCATTGATTATACTGGGTTGCCATT             |
| Desulfobacter postgatei 2ac9<br>ctg445 | AGJR01000009.1 | 114910-114826   | AATAGAAAATACCAAACCTGTTGTGAAGCAGGGACGGAAAGCCACGGGTCTTAAAGTTGCATCAATAGAAAGCCGGGTTGCCTTT |
| Desulfobacter postgatei 2ac9<br>ctg446 | AGJR01000008.1 | 43629-43708     | AACAGTCAAAGCCAAACCTGACGAAAGTCAGGGACGGAAAGACACGGATTCTAATTAAAGGGACAGCCGGGTTGCCTGA       |
| Desulfobacter postgatei 2ac9<br>ctg450 | AGJR01000004.1 | 208953-208876   | AAATAGAAAAGCCAATTCTGCACAGATGCAGAAACGGAAAGCCATAGGGTCTATGATTTAGATAGCCGGGTTGCCTCG        |
|                                        |                |                 |                                                                                       |
| Desulfobacterium<br>autotrophicum HRM2 | CP001087.1     | 3010098-3010019 | TTCCGACAAAGGTAACCCGTGGGTAACACGGTTCACAAAGCTTATGGGTCCGTCATTGGCGGATAGCCGAGTTGCCGAA       |
|                                        |                |                 |                                                                                       |
| Desulfobulbus propionicus              | CP002364.1     | 1829443-1829363 | TTGATAACTGGGCAAACATACCGAAAGGTATGGGCGCAAAGTCTCCGGCCTACGGGAAACTATGGTAGCGGGACTGCGGCA     |

|                                                   |                |                 |                                                                                                                      |
|---------------------------------------------------|----------------|-----------------|----------------------------------------------------------------------------------------------------------------------|
| DSM 2032                                          |                |                 |                                                                                                                      |
| Desulfococcus oleovorans<br>Hxd3                  | CP000859.1     | 2080979-2081056 | TCATGCTAAAGCCAAACTCCGGGCGACCGGAGGACGGAAAGCAACGGGTCTTAATATAAAGACAGCCGGGCTGCCATG                                       |
| Desulfohalobium retbaense<br>DSM 5692             | CP001734.1     | 427624-427550   | GACTGACAAAGCCAAACCCGTCGTGAGGCGAGGACGGAAAGCCACGGGTCTCAATGAGACAGCCGGGTTGCCGGA                                          |
| Desulfohalobium retbaense<br>DSM 5692             | CP001734.1     | 1118070-1118144 | GACTGACAAAGCCAAACCCGTCGTGAGGCGGGGACGGAAAGCCACGGGTCTCAATGAGACAGCCGGGTTGCCGGA                                          |
| Desulfonatronospira<br>thiodismutans ASO3-1 ctg19 | ACJN02000003.1 | 250966-251062   | TACATATCCAGCCAAACCCGCCGCAAGGCGGGGACGGAAAGCCACGGGCCCCGGGATTAAAAAGTCATAGCATACGCGGGCAGCCGGGTTGCCGGA                     |
| Desulfonatronospira<br>thiodismutans ASO3-1 ctg21 | ACJN02000001.1 | 84539-84450     | GTCTGACAAAGGCAACACAGCCTGAAAAGGTGTGACGCAAAGCCACCGGCCTGGATTTTTTTTGGGAGTATGGCAGCGGGGTTTCCGGA                            |
| Desulfosporosinus meridiei<br>DSM 13257 ctg108    | AGJA01000012.1 | 5783-5697       | TTATTGACAAGGCCAACTGAGCGAAAGCTCAGGACGCAAAGCTACGGATCTTCCACTCTTAGGGGTAAAGATGGCCGAGTTACCAAT                              |
| Desulfosporosinus meridiei<br>DSM 13257 ctg109    | AGJA01000009.1 | 122495-122577   | CTGCGATAAAGGCCAACTCAGTGAGAACTGAGGACGCAAAGCCACGGGTCTTACACATGTGTGAAGACAGCCGGGTTATCGAA                                  |
| Desulfosporosinus meridiei<br>DSM 13257 ctg117    | AGJA01000003.1 | 459792-459896   | AAACGGTTGGGGTAAACTTCGCGAAAGCGAAGGACGCTAAAATCATGGGTCTAAGGCTGCTAATTCACACATGGAAATTAGGCTAGGATCGCCAGATT<br>ACAAGC         |
| Desulfosporosinus meridiei<br>DSM 13257 ctg117    | AGJA01000003.1 | 75111-75197     | TAATGAGAAAAGTAACTTACTGAAAGGTAAGGACACAAAGCCATGAGTCTAAGGTATGAAGATACTATGATTGTCAGGTTGCCAAA                               |
| Desulfosporosinus meridiei<br>DSM 13257 ctg117    | AGJA01000003.1 | 457715-457825   | GTTTCGGTTGGGGTAAACTTCGCGAAAGCGAAGGACGCTAAAGTCATGGGTCTAAGGCTAAATTCAAAGGGCTGCTAATACCTTTGAGGGCTATGATCGC<br>CAGACTACAAGC |

|                                                |                |                 |                                                                                                                                  |
|------------------------------------------------|----------------|-----------------|----------------------------------------------------------------------------------------------------------------------------------|
| Desulfosporosinus meridiei<br>DSM 13257 ctg118 | AGJA01000001.1 | 182645-182558   | TGACGACATTAGCAAACCTTGAGCGAAAGCCAAGGACGCAAAGCCATGGGTCTTCCAGTTGTATAACTGATGATTGCCAGGTTACCGAA                                        |
| Desulfosporosinus meridiei<br>DSM 13257 ctg118 | AGJA01000001.1 | 435027-435109   | CTGCGATAAGAGCAAACCCAGTGAGAACTGGGGACGCAAAGCCACGGGTCTTCATTTATTATAAGATAGCCGGGTTACCGAA                                               |
| Desulfosporosinus orientis<br>DSM 765          | CP003108.1     | 4122117-4122032 | ATGCGATAAAGGCAAACCTCCGCGAAAGCTGGGGACGCAAAGCCACGGGTCTTAGCATGATTGGGTGAAGACAGCCGGGTTACCGAA                                          |
| Desulfosporosinus orientis<br>DSM 765          | CP003108.1     | 5825576-5825492 | TAAAGACAAAGGCAAACCCAGCTAAAGCTGGGGACGCAAAGCCACGGATCTTACACGTAAGGGTGATGATGGCCGGGCTGCCTAC                                            |
| Desulfosporosinus orientis<br>DSM 765          | CP003108.1     | 644558-644650   | TCAAATAGTAGCAAATCTATTGAAAATAGAGACGCAAAGCCACGGGTCTAAAGCAGGCCTTCTGCCTGTATGACGGCCGGGTTGCAGAA                                        |
| Desulfosporosinus orientis<br>DSM 765          | CP003108.1     | 4078740-4078656 | CTGCGATAATGGCAAACCCAGTGAGAGTTGGGGACGCAAAGCCACGGGTCTGACCACAGAATGTGAAGATAGCCGGGTTATCGAA                                            |
| Desulfosporosinus orientis<br>DSM 765          | CP003108.1     | 466066-465952   | GTTCGGTTGGAGCAAACCTTCGCGAAAGCGTAGGACGCTAAAGTCATGGGTCTAAGGCCCGCTGAGAGAATATTACTATACTCTTCAGACAGGTTATGA<br>TCGCCAGACTACAAGC          |
| Desulfosporosinus orientis<br>DSM 765          | CP003108.1     | 1268377-1268463 | GACGATAAATAGCAAACCTTGAGTGAAAGCCAAGGCGCAAAGCCTTGGGTCTTCCAGTTGTCTAACTGATGATTGCCAGGTTACCGAT                                         |
| Desulfosporosinus orientis<br>DSM 765          | CP003108.1     | 5373108-5373024 | TTGCGATAAAGGCAAACCTTAGTGAAACTAAGGACGCAAAGCTATGGGTCTTCCGGGTAAAGCTGATGACTGCCAAGCCACCGAA                                            |
| Desulfosporosinus sp. OT<br>TOU.assembly.114   | AGAF01000016.1 | 5315-5399       | GGTTGATAAAGGCAAACCTTAGCGAAAGTTAAGGACGCAAAGCCACGGGTCTTCTGCTTACAAGTAATGATCGCCGGGCTACCGAG                                           |
| Desulfosporosinus sp. OT<br>TOU.assembly.146   | AGAF01000050.1 | 9055-8966       | TAGCGCTAAGGGCAAACCTGTCAAAAGATAGGGACGCAAAGCCATAGGGTCTAAGGTGCTTACCAGCACTATGATAGCCTGGCTACCGCA                                       |
| Desulfosporosinus sp. OT<br>TOU.assembly.149   | AGAF01000053.1 | 65276-65397     | GTTCGGTTGGGGTAAACCTTTGCGAAAGCGAAGGACGCTAAAGTCATGGGTCTAAGGCTTAAGAAAACCAAAGTACTTTTTCAAGTAACTTGGAACCTTA<br>AGCTAAGATCGCCAGATTACAAGA |
| Desulfosporosinus sp. OT                       | AGAF01000059.1 | 30745-30836     | TATTATTAAGGGCAAACCTGTCTAAAGACAAGGGACGCAAAGCCATAGGGTCTAAAGTGCTATAGCGGTACTATGATAGCCTGGTTGCATAG                                     |

|                                              |                |                 |                                                                                             |
|----------------------------------------------|----------------|-----------------|---------------------------------------------------------------------------------------------|
| TOU.assembly.155                             |                |                 |                                                                                             |
| Desulfosporosinus sp. OT<br>TOU.assembly.203 | AGAF01000111.1 | 50366-50277     | TCAGCCTAAGGGCAAACCTTGTTAAAAGGCAGGGACGCAAAGCCATCGGATCTAAAGCGCTTATGAGTACTATGACAGCCTGGCTGCCGCA |
| Desulfosporosinus sp. OT<br>TOU.assembly.203 | AGAF01000111.1 | 28402-28318     | AAACGATAAAGGCAAACCTTGGTGAAAGCCAAGGACGCAAAGCCATGGGTCTTCCATGTTAAGGTGAAGATAGCCGGGTACCATA       |
| Desulfosporosinus sp. OT<br>TOU.assembly.252 | AGAF01000165.1 | 46546-46463     | AGATGAAAAAGGTAAACCCGTTGAAAGACGGGGACACAAAGCTATGGGTCTAAGGCTATACGCTATGACTGCCAGGTTGCCACT        |
| Desulfosporosinus sp. OT<br>TOU.assembly.27  | AGAF01000192.1 | 19086-19005     | TAACGATAAAGGCAAACCTTGGTGAGAGCCAAGGACGCAAAGCCACGGGTCTTCATTAAGCTGAAGATAGCCGGGTACCACA          |
| Desulfosporosinus sp. OT<br>TOU.assembly.275 | AGAF01000187.1 | 39470-39383     | TTCTTTTAAGGGCAAACCTTACTTAAAGGTGAGGACGCAAAATCACAGGTCTAAGGTTCCCTTCAGAACTATGACGGCTGGATTGAACAA  |
| Desulfosporosinus sp. OT<br>TOU.assembly.4   | AGAF01000229.1 | 60313-60227     | CAGCGATAAAGGCAAACCTCAGTGAGAACTGAGGACGCAAAGCCACGGGTCTCCTATTGCTTTACGGAAGATAGCCGGGTACCAGAA     |
| Desulfosporosinus sp. OT<br>TOU.assembly.47  | AGAF01000226.1 | 5987-6068       | TAACGACAAAGGCAAACCTTGGTGTAACCAAGGACGCAAAGCCACGGGTCTTCCTTAAGCTGAAGATAGCCGGGTACCCTA           |
| Desulfosporosinus sp. OT<br>TOU.assembly.61  | AGAF01000242.1 | 59563-59476     | CTGCGATAAAGGCAAACCTCAGTGAGAGCTGAGGACGCAAAGCCACGGGTCTCCACACCTTAGAGTGGAAGATAGCCGGGTACCAGAA    |
| Desulfosporosinus sp. OT<br>TOU.assembly.62  | AGAF01000243.1 | 2481-2397       | TTCTGAAAATGGCAAACCTTAGCGAAAGCTAAGGACGCAAAGCCATAGATCGTACAGGGAAGGCTGACGACAGCTAGGCTACCAAA      |
|                                              |                |                 |                                                                                             |
| Desulfotomaculum<br>acetoxidans DSM 771      | CP001720.1     | 4469519-4469430 | AAACAGGAAGAGCAAACCTGGCGAAAGTCGGAGACACAAAGCTACATGGTCTAAAATGCAGACAAGTATTACGACAGCCTGGCCGCCGTA  |
| Desulfotomaculum<br>acetoxidans DSM 771      | CP001720.1     | 1572818-1572907 | TATTAGTAAGGGCAAACCTATTTAAAAATAGGGACGCAAAGCCTAGGGTCTAAGGTGCTGAATAAGCGCTATGATAGCCTGGTTGCCGCA  |
| Desulfotomaculum                             | CP001720.1     | 3575661-3575571 | ATAACTAATGGGCAAAACCATACGAAAGATGGTGACGCAAACCTTGGATCTAAGGTCATAAAATATGGCTATGATTGCCAGGCTGCAAAT  |

|                                               |                |                 |                                                                                                      |
|-----------------------------------------------|----------------|-----------------|------------------------------------------------------------------------------------------------------|
| acetoxidans DSM 771                           |                |                 |                                                                                                      |
| Desulfotomaculum<br>acetoxidans DSM 771       | CP001720.1     | 4175329-4175242 | AGCCTTAGAGGGCAAATCTGGCGAAAGCCAGAGACGCAAAGCCAAGGGTCTAAGTTGCATTAAGCGATAAGATAGCCTGGTTGCAAAA             |
| Desulfotomaculum<br>carboxydivorans CO-1-SRB  | CP002736.1     | 682909-682822   | GGTTGAAAAAGGCAAACCTATCCGAAAGGTAGGGGCGCAAAACCATGGGTCTAAATCGTTTCTGCGATATGATCGCCAGGTTGCCAAC             |
| Desulfotomaculum<br>carboxydivorans CO-1-SRB  | CP002736.1     | 2301344-2301268 | ATACGATAAGGGCAAACCTATTGAAAGATAGGGACGCAAAGCCACGGGCCTAAAACGATGGCAGCCGGGTACCGAA                         |
| Desulfotomaculum<br>carboxydivorans CO-1-SRB  | CP002736.1     | 2837937-2837853 | AGTAAAAAGGGCAAACCTTGTGCGAAAGGCAAGGACGCAAAGCCGGGGTCTAAAGTTAAATAAACCATGACAGCCGGTTGCTGAT                |
| Desulfotomaculum<br>gibsoniae DSM 7213 ctg381 | AGJQ01000021.1 | 60589-60677     | CCACGGGTTAGGCAAACCTGGTGAAAGCCAGGGACGCTAAAGCTATGGGTCTAATGGTTTGAAAAACCTATGATTGCCAGGCTATAACG            |
| Desulfotomaculum<br>gibsoniae DSM 7213 ctg384 | AGJQ01000019.1 | 72207-72109     | GTTTCACAAAGGCAAACCTACATCGAAAGATTAGGGCGCAAAGCCATGGGTCTAAAGCGCTTGAGCTTATTAATAGTGCAATGATTGCCAGGTTGCGGGA |
| Desulfotomaculum<br>gibsoniae DSM 7213 ctg385 | AGJQ01000018.1 | 12827-12915     | TTTCTGAAAAGGCAAACCTGTTGAAAGACAGGGACGCAAAGCCATGAGTCTAAGGTTTTTGAAAGGGCTATGACAGTCAGGCTGCCGGA            |
| Desulfotomaculum<br>gibsoniae DSM 7213 ctg402 | AGJQ01000001.1 | 21022-20935     | TAAAGTTAAGGGCAAACCTGTCTAAAGGCAGGGACGCAAAGCCGAGGGTCTAAAGCGTTTGCCGCGCTATGACAGCCTGGCTGCCGAT             |
| Desulfotomaculum<br>gibsoniae DSM 7213 ctg402 | AGJQ01000001.1 | 33891-33805     | AATTGATAAAGGCAAATCCGTGCGAAAGGCGGAGACGCAAAGCCGCAAGTCTAAAGCAAGAGATTGCTATGATAGTTGGGCTGCCAAT             |
| Desulfotomaculum<br>kuznetsovii DSM 6115      | CP002770.1     | 1790648-1790561 | ATTGTCCAGGGGCAAACCTTACCGAAAGGGAGGGGCGCAAAGCCACGGGCCTAAAGCGGACTCCCGCTAAGGCAGCCGGGTGCGACA              |
| Desulfotomaculum<br>kuznetsovii DSM 6115      | CP002770.1     | 569329-569414   | TTGTGTTAAAGGCAAACCACTCGAAAGGGTGGGGCGCAAAGCCATGGGTCTGCAGCCCTAAAGGGTATGACTGCCAGGCTGCCGCG               |
| Desulfotomaculum<br>kuznetsovii DSM 6115      | CP002770.1     | 3293408-3293316 | AATCCCGGTGGGCAAACCCGGCAAAAGCCGGGGACGCAAAGCCACAGGTCTAAAGTTACCCATTGAGGTAACCATGACGGCTGGGTTGCAAGG        |

|                                                     |                |                 |                                                                                                                                                      |
|-----------------------------------------------------|----------------|-----------------|------------------------------------------------------------------------------------------------------------------------------------------------------|
| Desulfotomaculum<br>kuznetsovii DSM 6115            | CP002770.1     | 2737106-2737195 | TTACGGGTTGGGCAAACCGGGCGAAAGCCGGGACGCTAAAGCCATGGGTCTAAGGTCCTTTTCAGGACTATGATCGCCAGGCTGCAACG                                                            |
| Desulfotomaculum<br>kuznetsovii DSM 6115            | CP002770.1     | 668125-668210   | CCCGATTAAAGGCAAAGCCATTGAAAAATGGCGGCGCAAAGCTATAGGGGCTAAGGCGAACAACGCTATGCCAGCCAGCTGCCGGG                                                               |
| Desulfotomaculum<br>kuznetsovii DSM 6115            | CP002770.1     | 771180-771270   | CTTCCGGAGGGCAAACCCGGCGAAAGCCGGGGACGCAAAGCCACAGGTCTAAAGTTCCCCGCGGGGAACCATGACGGCTGGGTTGCAAGG                                                           |
| Desulfotomaculum<br>kuznetsovii DSM 6115            | CP002770.1     | 1050220-1050361 | AATCCTGGAGGGCAAACCTCGGCGAAAGCCGGGGGCGCAAAGCCACAGGTCTAAGGTTCCCCAAAAGCGCTCGAAGGCAAAGCCACAGGTCTAAGGT<br>TCCCCAAAAGGTTGCCACGGGGAACCTATGACGGCTAGGTTGCAAGG |
| Desulfotomaculum<br>kuznetsovii DSM 6115            | CP002770.1     | 239178-239089   | GGGCGTCAAGGGCAAACCCATTGGTGGGGACGCAAAGCTACAGGGTCTAAGGTGCTTATGCGATGGCACTACGACAGCCTGGCCGCCGCG                                                           |
| Desulfotomaculum<br>kuznetsovii DSM 6115            | CP002770.1     | 885656-885746   | GCCCGAAAATAGCAAACCCGTGCGAAAGCCGGGGACGCAAAGCCATGGGCCTACAGCGGTGTTGTGCCGCTACGGTTGCCAGGTTGCCGAA                                                          |
| Desulfotomaculum<br>nigrificans DSM 574<br>ctg00018 | AEVP01000018.1 | 9627-9714       | ATGTATATTGGGCAAACCCGTGCGAAAGGCGGTGGCGCAAAGCCAAGGGCCTAAGGAGTAAAGAAATCTATGGCAGCCGGTTGCAGCA                                                             |
| Desulfotomaculum<br>nigrificans DSM 574<br>ctg00084 | AEVP01000043.1 | 15009-15096     | GGTTGAAAAAGGCAAACCTATCCGAAAGGTAGGGGCGCAAAACCATGGGTCTAAATCGTTTCTGCGATATGATCGCCAGGTTGCCAAC                                                             |
| Desulfotomaculum<br>nigrificans DSM 574<br>ctg00101 | AEVP01000014.1 | 784-868         | AGTAAAAAGGGCAAACCTGTGCGAAAGGCAAGGACGCAAAGCCGGGGTCTAAAGTTTAAATAAACCATGACAGCCGGTTGCTGAT                                                                |
| Desulfotomaculum reducens<br>MI-1                   | CP000612.1     | 2518598-2518516 | AATAAAGAAAGGCAAACCTACTGAAAGGTAGGGGCGCAAAGCTAGAGGGTCTAAGGGGGAACCTATGACAGCCAGTTGCTCCG                                                                  |
| Desulfotomaculum reducens<br>MI-1                   | CP000612.1     | 1256280-1256362 | TAACAAACAGGGCAAACCTGGTGAAAGTCAGGGACGCAAAGCCATGGGTCTAAAGCGAATGCCAGGACGGCTAGGCTACTAAA                                                                  |

|                                      |            |                 |                                                                                                                                         |
|--------------------------------------|------------|-----------------|-----------------------------------------------------------------------------------------------------------------------------------------|
| Desulfotomaculum reducens<br>MI-1    | CP000612.1 | 3257014-3256933 | TTCCGACAAAGGCAAACCTCCGAAAGGTGGGGCGCAAAACCACGGGCCTAAGGTGTAGCTAGGGTAGCCGGGTTGCCGAG                                                        |
| Desulfotomaculum reducens<br>MI-1    | CP000612.1 | 2231434-2231354 | TTCAAAATGGGTAAATCTTGAAAGGTAGGGACGCAAAGCCATGGGTCTAATGCATTGCAATGATAGCCAGGCAGCATAA                                                         |
| Desulfotomaculum reducens<br>MI-1    | CP000612.1 | 1107064-1107147 | AAAATTTAAAGGCAAACCTTCCGAAAGGAAAGGACGCAAAGCCACGGGCCTAAGGACATTGTCTATGGTAGCCGGGCCGCCTTA                                                    |
| Desulfotomaculum reducens<br>MI-1    | CP000612.1 | 416215-416306   | GAAACTGAAGGGCAAACCCGAACGAAAGACGGGGACGCAAACCTTGGGTCTAAGGTTCTAGGAATGAACATTGATTGCCAGGCTGCAAAA                                              |
| Desulfotomaculum ruminis<br>DSM 2154 | CP002780.1 | 3531132-3531049 | AGACGATAAAGGCAAACCTTATCGAAAGGTAAGGACGCAAAGCCATGGGCCTAATCCGAAGGGAACGGTTGCCAGGCTGCCAAA                                                    |
| Desulfotomaculum ruminis<br>DSM 2154 | CP002780.1 | 3171783-3171704 | AATACGAAAAGGCAAACCTAGCGAAAGTTAGGGACGCAAAGCCACGGGCCTCATTTTCATGTGGCGGCCGGGCTGCCGAA                                                        |
| Desulfotomaculum ruminis<br>DSM 2154 | CP002780.1 | 1842846-1842762 | TTAAATATCGGGCAAATCTGTGCGAAAGGCAGAGACGCAAAGCTATGGGCCTAAGGCAGAAATGCTATGGTTGCCAGGTTGCTTAA                                                  |
| Desulfotomaculum ruminis<br>DSM 2154 | CP002780.1 | 1614085-1613996 | GTCAGATACTGGCAAACCTGGTGGAAACACCGGGACGCAAAGCAATAGGGCCTAATCTCCGGCAGGAGGGACGGCAGCCTGGCCGCCGAA                                              |
| Desulfotomaculum ruminis<br>DSM 2154 | CP002780.1 | 668160-668076   | AGTATGAAAAGGCAAATCCATTGAAAAATGGGGGCGCAAAGCCATGGGTCTAAGCCAAGTTCGGTATGATTGCCAGGCTGCCAAA                                                   |
| Desulfotomaculum ruminis<br>DSM 2154 | CP002780.1 | 3181084-3181173 | TAATCCAAAAGGCAAACCATCCGAAAGGTTGGGACGCAAAGCCATGGATCTAAGGCAGGTTTATATGCTAAGATTGCCAGGTTGCGGAG                                               |
|                                      |            |                 |                                                                                                                                         |
| Desulfovibrio aespoensis<br>Aspo-2   | CP002431.1 | 3315258-3315128 | GGTAAGACAAGCCAAACCCGTCGCGAGACGGGGACGGAAAGCCACGGGTCTTTGCCCGCTTCGGTCTCTGTCCGGCATCGGTGCCGGGACATGGGAG<br>CGAAGGGGTACGCAAAGACAGCCGGGTTGCCAGA |
| Desulfovibrio aespoensis<br>Aspo-2   | CP002431.1 | 2774858-2774783 | TGTTATTAAGCCAAATTCGTCGTGAGGCGGAGACGGAAAACCACGGATCTCAGAAGAGATAGCCGGGTTACCGAT                                                             |



|                                                         |                |                 |                                                                                             |
|---------------------------------------------------------|----------------|-----------------|---------------------------------------------------------------------------------------------|
| Desulfovibrio africanus str.<br>Walvis Bay ctg406_Cont2 | AFHE01000002.1 | 381807-381895   | ACTCGCTAAAGGCAAACCACTTTAAAGAGTGGGACGCAAAGTCTTCTGCCTACGTTCCCTTCGGGGAATATGGTCGTGAGGCTGCCGAG   |
| Desulfovibrio alaskensis<br>G20                         | CP000112.1     | 841128-841197   | CGAGAATCAAGCCAACCCGCCTCAGGCGGGACGAAAGCCACGGGTCTTTCAGACAGCCGGGTTCCTCG                        |
| Desulfovibrio desulfuricans<br>ND132 ctg54_1_Cont4      | AEUJ01000004.1 | 187919-187845   | TAGAGAAACTGCCAAACCCGCCGAGGCGGGACGAAAGCCACGGGCCTACGCAGGCAGCCGGGTTCCTAC                       |
| Desulfovibrio<br>fructosovorans JJ ctg00015             | AECZ01000036.1 | 40498-40584     | CACTGAAAAAGGCAAACCTTCGAAAGAAGGGGACGCAAAGCCACGGGCCTACGTCCCGCAAGGGATACGGTAGCCGGGCCGCAAT       |
| Desulfovibrio magneticus<br>RS-1 DNA                    | AP010904.1     | 3289058-3288977 | AGTCTGTAAAGCCAACCCGTCGTGAGGCGGGTGCGTACGAAAGCCACGGGCCTACGGTTGAGGCAGCCGAGCCGCCATG             |
| Desulfovibrio magneticus<br>RS-1 DNA                    | AP010904.1     | 4339624-4339540 | GCCCAATAACGCCACCCCTGCCGCGAGGCAGGTCCGGAAAGCCGCGGGTCTCGACGGCCGTCGTCGAGACAGCCGGGCCGCTGGG       |
| Desulfovibrio sp. A2<br>tab.contig.37                   | AGFG01000038.1 | 17557-17631     | CGAGACAAATGCCAAACCTGCCGTGAGGTAGGGACGAAAGCCACGGGTCTCTCGAAGACAGCCGGGCCGCTTG                   |
| Desulfovibrio sp. A2<br>tab.contig.41                   | AGFG01000042.1 | 88257-88181     | TCAAGAGAAAGCCAAACCCGCCGAGGCGGGGACGAAAGCCACGGATCTCGCGCAGAGACAGCCGGGTTCCTGCG                  |
| Desulfovibrio vulgaris str.<br>'Miyazaki F'             | CP001197.1     | 2307925-2307849 | ACAAGCGAAAGCCAAACCCGCTGCGAGGCGGGGACGAAAGCCACGGATCTCGCGTAGAGACAGCCGGGTTCCTGCG                |
| Desulfurivibrio alkaliphilus<br>AHT2                    | CP001940.1     | 469814-469735   | CTCTGATAAGGGTAAACCCATCGTAAGGTGGGGACACAAAGCCAACGGGTCTTGAGCACAGGACGGCCGGGTTCGCCGA             |
| Desulfurivibrio alkaliphilus<br>AHT2                    | CP001940.1     | 2075224-2075133 | CCACGAAAAAGGCAAACCATCGCGAAAGCATGGGACGCAAAGCCACCGGCCTTCTTCTGTGAAGACAGGAAATGGCAGCGGGGTTCGCCGA |
| Desulfuromonas acetoxidans                              | AAEW02000011.1 | 10503-10578     | GCAAGATAAAGGCAAACCGAAGTAATTCGGTGACGCAAAGCCACGGGTCCATAACTGGATCGCCGGGTTCCTCAA                 |

|                                             |                |               |                                                                                          |
|---------------------------------------------|----------------|---------------|------------------------------------------------------------------------------------------|
| DSM 684 ctg54                               |                |               |                                                                                          |
| Desulfuromonas acetoxidans<br>DSM 684 ctg66 | AAEW02000001.1 | 146764-146686 | CTCCGATAAAGGCAAAACCGGAGTAATCCGGTGACGCAAAGCCACGGGTCCTGTTTGACAGGATCGCCGGGTTCGCCGAA         |
|                                             |                |               |                                                                                          |
| Dethiobacter alkaliphilus<br>AHT 1 ctg11    | ACJM01000001.1 | 102217-102302 | CAGTATAAAAGGCAAATCCGTTGAAAAGCGGGGACGCAAAGCTATGGGTCTAAGGCGGAATGCCGCTATGACAGCCGGTTGCCAAA   |
| Dethiobacter alkaliphilus<br>AHT 1 ctg13    | ACJM01000030.1 | 1847-1764     | CCTTGATAAGGGCAAACCTGTCGAAAGGCAGGGACGCAAAGCTACAGGTCTAAAGCATTTTGCTAAGACAGCTGGGTTGCCGGG     |
| Dethiobacter alkaliphilus<br>AHT 1 ctg16    | ACJM01000018.1 | 13988-14074   | AGGTGAAAAAGGCAAACGTTCTGAAAGGAACGGGCGCAAAGCCACGGGTCTAAAGCCTTAAAGGCCATGATAGCCGGGTGCCCCA    |
| Dethiobacter alkaliphilus<br>AHT 1 ctg21    | ACJM01000017.1 | 32821-32734   | GCTTGAAAAAGGCAAACCTGTCGAAAGGCAGGGACGCAAAGCCAAGGGTCTAATGCTGTTTTACAGCGATGACAGCCGGTTGCCGGG  |
| Dethiobacter alkaliphilus<br>AHT 1 ctg27    | ACJM01000016.1 | 42135-42050   | GTCGAATAAAGGCAAACCTCGCCGAAAGGCGGGGACGCAAAGCCACAGGCCTACGGTTGTAATGACTATGGCGGCTGGGTTGCCGGC  |
| Dethiobacter alkaliphilus<br>AHT 1 ctg28    | ACJM01000007.1 | 61666-61582   | AACTGTTAAAGGCAAGCTCGTCGAAAGGCGGGTACGCAAAGCCATGGGTCTAATGCTATTGTAGCGATGACAGCCGGTTGCCAGG    |
| Dethiobacter alkaliphilus<br>AHT 1 ctg28    | ACJM01000007.1 | 39998-40079   | CCTTGATAAAGGCAAACCGTCGAAAGACGGGGACGCAAAGCCACGGGCCTAAAGCATTGCTATGGCAGCCGGGTCGCCGGG        |
| Dethiobacter alkaliphilus<br>AHT 1 ctg36    | ACJM01000005.1 | 37784-37870   | ATTCGCTCAGGGCAAACCTGTTGAAAGGCAGGGACGCAAAGCCAAGGGTCTAACACTGCAAAGCAGTCATGACAGCCGGTTGCCGAA  |
| Dethiobacter alkaliphilus<br>AHT 1 ctg4     | ACJM01000010.1 | 93366-93279   | ACTGGATAATGGCAAACCTGTTGAAAAGCAGGGACGCAAAGCTAAGGGTCTACGGCACATTTTGTGTCATGACAGCCTGGTTATCGAA |
| Dethiobacter alkaliphilus<br>AHT 1 ctg9     | ACJM01000004.1 | 66132-66048   | ATCCGACAAAGGCAAACCTGCTGAAAGGCAGGGACGCAAAGCCATGGGTCTAAGGGCACACGCCTACGATCGCCAGGTTGCCGAA    |
|                                             |                |               |                                                                                          |

|                                                                            |                |               |                                                                                                |
|----------------------------------------------------------------------------|----------------|---------------|------------------------------------------------------------------------------------------------|
| Dorea formicigenerans<br>4_6_53AFAA cont1.37                               | ADLU01000037.1 | 19561-19636   | TAATATTTTGGGCAAAACAGACGAAAGTCTGCGACGCAAAGCTATAGGACCTGTAAAATGGTAGCCAGTTGTAAAA                   |
| Dorea formicigenerans<br>4_6_53AFAA cont1.66                               | ADLU01000066.1 | 25331-25406   | TAAGGAAATCGGCAAACCAGATGAAAGTCTGGGACGCAAAGCTACAGGGCCTGTAAAATGGCAGCCAGTTGCATAA                   |
| Dorea formicigenerans<br>ATCC 27755<br>D_formicigenerans-3.0.1_C<br>ont150 | AAXA02000010.1 | 13807-13732   | TAATATTTTGGGCAAAACAGACGAAAGTCTGCGACGCAAAGCTATAGGACCTGTAAAATGGTAGCCAGTTGTAAAA                   |
| Dorea formicigenerans<br>ATCC 27755<br>D_formicigenerans-3.0.1_C<br>ont399 | AAXA02000015.1 | 880668-880758 | TTATTTTAAAGGCAAACCTGTTGAAAGGCAGGGGCGCAAAGCCAGAAGGGACTAAAGTCAGAAAACCTTGACCATGTCAGCCGGTTGCCACT   |
|                                                                            |                |               |                                                                                                |
| Eggerthella sp. YY7918<br>DNA                                              | AP012211.1     | 612893-612976 | TATTTTCACGAGCAAACCTGCCGGAAGCAGGGACGCAAAGCTATAGGGGCCGAACCCCTTGGGGCGGCTAGCCAGTTGCGATC            |
| Eggerthella sp. YY7918<br>DNA                                              | AP012211.1     | 493503-493586 | ATATTCTCAAGGCAAACCCGCGTAAGGCGGCGACGCAAAGCTACAGGGGCCATATCGGTTCGATGGGTGAGCCAGCTGCGGTC            |
| Eggerthella sp. YY7918<br>DNA                                              | AP012211.1     | 141116-141199 | ATGTCTTCAAGGCAAACCTGCCGGAAGGCAGCGGCGCAAAGCTAAAGGGGCCATTCTAAGAAGAAGGCCAGCCAGTTGCACGT            |
| Eggerthella sp. YY7918<br>DNA                                              | AP012211.1     | 882367-882451 | ATCGGCTACGGGCAAACCCGTCGAAAGACGGTGACGCAAAGCTAAAGGGCCTTCGCCGCGTGCGGCATGGCAGCCAGTTGCAAAG          |
|                                                                            |                |               |                                                                                                |
| Environmental sequence<br>2662324_fastA.screen.Conti<br>g11497             | AAFX01114411.1 | 145-238       | CCATCGAACGGGCAAACCCACTGAGAGGTGGGGACGCAAAGCCTCCGGTCCCAGAGAGTCTAGTAAGACATTCTTCGGATAGCGGGTTGCCAGG |

|                                                                |                |           |                                                                                                              |
|----------------------------------------------------------------|----------------|-----------|--------------------------------------------------------------------------------------------------------------|
| Environmental sequence<br>2662324_fasta.screen.Conti<br>g20358 | AAFX01070808.1 | 1034-948  | TCTGAAACAGGGCAAACCCGCCGAGAGACGGGGACGCAAAGCCAAGGATCTTCGCGACGAGAGTCGGCAAGACCGCCCGGTACCAGG                      |
| Environmental sequence<br>2662324_fasta.screen.Conti<br>g24218 | AAFX01084845.1 | 258-332   | AAAGGAAAAAGGCAAACCTTACCGTGAGGTAAGGACGCAAAGCCACGGGACTCGAGGAGTCAGCCGGGTTACCCAT                                 |
| Environmental sequence<br>2662324_fasta.screen.Conti<br>g32687 | AAFX01108761.1 | 554-467   | TTCCGCAAAGGGCAAACCGCGCGAAAGCGCGGGACGCAAAGCCGCTGGCCTAAGTCTCTCAGCGAGATACGGCAGCAGGGTTGCCGGA                     |
| Environmental sequence<br>2662324_fasta.screen.Conti<br>g34285 | AAFX01084815.1 | 828-726   | GCGCGACAAGGGCAAACCGGGCGAAAGCTTGGGACGCAAAGCCACGAGGCTAAAGCAGGACTGTCCGAAGACGGCGGTTCGGCCAAGCCAGTCGGGT<br>CGCCGAG |
| Environmental sequence<br>2662324_fasta.screen.Conti<br>g3511  | AAFX01100921.1 | 226-134   | CGACGACAAAGGCAACCCCTTCGGAAACGAGGGTGGGCGCAAAGCAAACGGGGCTAACGCACGCACGCGTGCTATGCCGGCTGAGCCGCCAAA                |
| Environmental sequence<br>2662324_fasta.screen.Conti<br>g42409 | AAFX01003619.1 | 286-206   | TAACCGAAAAGGCAACCGCCGAGCAAAAAGCGGTGGGCGCAAAGCCAGGAGTTCCGTAAAGAACCGTCCGGCCGCCGAA                              |
| Environmental sequence<br>ctg11473                             | AATN01000135.1 | 4211-4308 | CTGATTAAAGGCAAACGGAGGGAAACCTCCGGACGCAAAGCCGCGGACCCTACCCTGAGTTGTCAGATAAGCTCAGAAGGGTGGCCGGGTTGCCCCG<br>A       |
| Environmental sequence<br>ctg1449                              | AATO01014039.1 | 335-238   | CTGATTAAAGGCAAACGGAGGGAAACCTCCGGACGCAAAGCCGCGGACCCTACCCTGAGTTGTCAGATAAGCTCAGAAGGGTGGCCGGGTTGCCCCG<br>A       |
| Environmental sequence<br>ctg16200                             | AATO01000161.1 | 2779-2876 | CTGATTAAAGGCAAACGGAGGGAAACCTCCGGACGCAAAGCCGCGGACCCTACCCTGAGTTGTCAGATGAGCTCAGAAGGGTGGCCGGGTTGCCCCG<br>A       |
| Environmental sequence                                         | AATO01013153.1 | 264-167   | CTGATTAAAGGCAAACGGAGGGAAACCTCCGGACGCAAAGCCGCGGACCCTACCCTGAGTTGTCAGATGAGCTCAGAAGGGTGGCCGGGTTGCCCCG            |

|                                                |                |             |                                                                                                                                                                                                                                    |
|------------------------------------------------|----------------|-------------|------------------------------------------------------------------------------------------------------------------------------------------------------------------------------------------------------------------------------------|
| ctg6129                                        |                |             | A                                                                                                                                                                                                                                  |
| Environmental sequence<br>GutlessWorm_Cont1000 | AASZ01001000.1 | 4254-4168   | ATAGCGAAAGGGCAAAGTCACCGAAAGATGGCGACGAAAACCGTGGATCTAAAGCCATTATGGCCAAGATAGCCAGGTTACCGAA                                                                                                                                              |
| Environmental sequence<br>GutlessWorm_Cont1127 | AASZ01001127.1 | 10703-10603 | GCTCGATAAAGGCAAACCACTCGAAAGGGTGGGACGCAAAGCCACTAATCCACCCTTGTTCCGTTGACATCGGAAGAATGGCGGACAGCAGGGCTGC<br>CGGG                                                                                                                          |
| Environmental sequence<br>GutlessWorm_Cont1200 | AASZ01001200.1 | 1265-1043   | TTAAGCAAAGGCCAACTCTCGGGGGATCGGGGGCGGAAAGCCACGGGTCTTAAGTTAGTTGAATGGTTTATCGGTTGATTTCGGTGAAATTCGCTGCG<br>CTGTCATATACCTGAACTTCACTGGATAAAATAGTTGACTGGTAAGGACGGGTAAATACCCCTCACTAATTAGCGTTTTACAAATCACTATTCAACGA<br>AAAAAGATAGCCGGGTACCTTA |
| Environmental sequence<br>GutlessWorm_Cont1208 | AASZ01001208.1 | 1150-1033   | TGCCATAAAAGCCACACCCATCGTGAGATGGGGTCGGAAAGCAACGGGTCTTGAAATATTCAAATTGACTATCAGCTAAATATTCTCCACGTGTGGATAA<br>GACAGCCGGGCTGCCGAG                                                                                                         |
| Environmental sequence<br>GutlessWorm_Cont1260 | AASZ01001260.1 | 516-606     | GCTTGATAATAGCAAACCACTTGAAAGGGTGGGACGCAAAGCCACTGGCCTAAATCTCGATTTCGGCGGGATATGGCAGCAGGGTTGCCGGG                                                                                                                                       |
| Environmental sequence<br>GutlessWorm_Cont1693 | AASZ01001693.1 | 1787-1864   | AACAGAAAAAGCCAAACCCGAGAGATCGGGAGACGGAAGCCACGGGTCTGAACTTAAAGATAGCCGGGCTGCCTTA                                                                                                                                                       |
| Environmental sequence<br>GutlessWorm_Cont2655 | AASZ01002655.1 | 5432-5343   | TTTACTGAAGGGCAAACCTTCCGAAAGGAGGGGGCGCAAAGCTTCCGGTCTAAGTTCTGATCAGACGAATAAGATAGCGGGGTTGCTAGG                                                                                                                                         |
| Environmental sequence<br>GutlessWorm_Cont2817 | AASZ01002817.1 | 8015-7939   | TATTGATAAAGCCAAACCCACCGGGAGGTGGGGGCGGAAAGCCACGGGTCTTGAACAGAGACAGCCGGGTTGCCAGG                                                                                                                                                      |
| Environmental sequence<br>GutlessWorm_Cont2941 | AASZ01002941.1 | 1174-1264   | GCTTGATAATAGCAAACCACTTGAAAGGGTGGGACGCAAAGCCACTGGCCTAAATCTCGATTTCGGCGGGATATGGCAGCAGGGTTGCCGGG                                                                                                                                       |
| Environmental sequence<br>GutlessWorm_Cont3026 | AASZ01003026.1 | 2488-2400   | CTAGCCGCAGGGCAAACTTCCGAAAGGAAGCGGCGCAAAGCTTCCGGCCTAAATCCTTAAACCGGGACACGGCAGCGGGGCTGCATGG                                                                                                                                           |
| Environmental sequence<br>GutlessWorm_Cont316  | AASZ01000316.1 | 1765-1675   | GCTTGAAGGGCAAACCGCTCGAAAGAGCGGGACGCAAAGCCACTGGCCTAAGTTCTGATATCGCGGAATACGGCAGCAGGGCTGCCGGG                                                                                                                                          |
| Environmental sequence                         | AASZ01000761.1 | 11028-10947 | TAAACGAAAAGGCAAAGCTGCCGAGCAGTCACGCAAAGCCACGGGTTTCTATATTTGAGTTGTGATAGCCGGGCTGCCGAA                                                                                                                                                  |

|                               |                            |           |                                                                                                     |
|-------------------------------|----------------------------|-----------|-----------------------------------------------------------------------------------------------------|
| GutlessWorm_Cont761           |                            |           |                                                                                                     |
| Environmental<br>s8_160359    | sequence<br>AAQL01001872.1 | 853-778   | TAGGATAATCGGCAAACCAGATGAAAGTCTGGGACGCAAAGCTACAGGGTCTTAAATGGCAGCCAGCTGCATGA                          |
| Environmental<br>s8_163345    | sequence<br>AAQL01003639.1 | 4195-4101 | TTTATATTGGGTAAAACTGTGCGAAAGGCAGCGACACAAAGCCAAATGGGTCTAAGGTTCAATTTTAAAGAGAATTATGACAGCCGGTTGCATCA     |
| Environmental<br>s8_175521    | sequence<br>AAQL01009711.1 | 838-751   | TTATTCATAGGGCAAACCTGTTGAAAGACAGGGACGCAAAGCCAGAAGGGTCTAAGGTCTTATTGGACTATGACAGTCGGTTGCCACA            |
| Environmental<br>s8_176510    | sequence<br>AAQL01009925.1 | 3116-3200 | GAAGGATAATAGCAAAATTAGTGAAAGCTAATGACGCAAAGCTACGGGTCTAAGTACAAAAGTATATGATTGCCGGGCCGCCCAA               |
| Environmental<br>s8_177602    | sequence<br>AAQL01010251.1 | 934-853   | ATATTTTAAAGGCAAACTRTTGAAAAATAGTGACGCAAAGCTACAGAACTGAACCGTAAGGAAGTTGGCTGAGTTGCAGAT                   |
| Environmental<br>s8_179529.1  | sequence<br>AAQL01011659.1 | 1058-1133 | TATGGAAATCGGCAAACCAGATGAAAGTCTGGGACGCAAAGCTACAGGGCCTGTAAATGGCAGCCAGTTGCATGA                         |
| Environmental<br>XZS102136.b1 | sequence<br>AAFX01019087.1 | 306-393   | TTTTGACAAGGGCAAAGCCATCGAAAGGTGGCGACGCAAAGTCACCGGCTAACGGGCGCAGCGCCCCACGGCAGCGGGACCGCCGGA             |
| Environmental<br>XZS115708.b1 | sequence<br>AAFX01022269.1 | 808-886   | TTTCGACAAAGGCACCCCGTCTGTAGGCCGGTCCGCAAAGCAAGGGATCTCCGAGGTGGAGACAGCCCTGCCGCCGAA                      |
| Environmental<br>XZS24728.x1  | sequence<br>AAFX01065385.1 | 658-754   | AGCGACAAAAGGCAAACCCGCCTAAAGGCGGGACGCAAAGCTCCGAAGCTAAAGCTGTGTACTCCGAAAGCAGCCAGGCTGGTCGAGCTACCGA<br>A |
| Environmental<br>XZS29341.x1  | sequence<br>AAFX01072742.1 | 371-297   | CTTCCGAAACGGCAAACCGGTGCGGAGGCCGGGACGCAAAGCAACGGATCTCCTCGAGATAGCCGTGCTACCGAA                         |
| Environmental<br>XZS29341.x1  | sequence<br>AAFX01072742.1 | 782-707   | CTTCCGAAAGGGCCAACCAAGTCGCGAGGCTGGTGCGCAAAGTCAGACTTCTCACGCAGAAGTGGCTGACTGCCGAA                       |
| Environmental<br>XZS29341.y1  | sequence<br>AAFX01051910.1 | 90-183    | TCGCGATAAGGGCAAACCCGCTGAAAGGCGGGGACGCAAAGCTCCGAGGCTAAAGCGGTGGAAAGTCCATCGCCATGCCGGTCGAGTTACCGAA      |

|                              |          |                |         |                                                                                                              |
|------------------------------|----------|----------------|---------|--------------------------------------------------------------------------------------------------------------|
| Environmental<br>XZS29962.y1 | sequence | AAFX01119316.1 | 250-171 | TTTCGACGAGGGCACCCCGCCGCGAGGCCGGTCCGCAAAGCCACGGGTCTCCTGACCGGGAGATGGCCGGGTGTGCGAA                              |
| Environmental<br>XZS33963.y1 | sequence | AAFX01103928.1 | 230-153 | CCCCGACAAGAGCAAACCCACGGTGACGTGGGGACGCAAAGTCACGGGCCAGCGAAAGCTGATAGCCGGACTGCCGAA                               |
| Environmental<br>XZS34958.b1 | sequence | AAFX01035207.1 | 214-290 | CTTCCGAAAAGGCAATCCGGCTGCGAGGCTGGTGCGCAAAGCTGATTCTCACGCAGAGAAACGTCCAGCTGCCGAA                                 |
| Environmental<br>XZS34958.b1 | sequence | AAFX01035207.1 | 567-643 | CTTCCGAAAAGGCACCCCGGCTGTGAAGCCGGTCCGCAAAGCCCAGGATCTCAATCCGAGACAGCCGGGTTTCCGAA                                |
| Environmental<br>XZS39783.b1 | sequence | AAFX01042002.1 | 359-448 | TCCGATAAAAAGCAAACCTGAGGAAACTCAGCGACGCAAAGTCATGGGTCTACGTCTCGTTCTACGGGATATGATCGCCAGACTACCGAT                   |
| Environmental<br>XZS39783.b1 | sequence | AAFX01042002.1 | 540-624 | CTAACCGAAAGGCAAACACAGGGAACCTGTGGGCGCAAAGTTATGGGTCTAAAGTCGGATGACCAGGACTGCCAGACTGCCGAA                         |
| Environmental<br>XZS43929.x1 | sequence | AAFX01029204.1 | 425-527 | TTTTGATAAGGGCAAACCTGAACCGAAAGGTTCTGCGCGCAAAGTTACCGGTCTAACGATCGAGCGTCTGCAAGATGCCGATCCATGATTGCGGGGCTGC<br>CGAA |
| Environmental<br>XZS45527.y1 | sequence | AAFX01035547.1 | 121-212 | TCGCGACAAAGGCAAAGTCGCTGAAAGGCCGGTGACGCAAAGCCTCGGGGCTACAGCGTGCGCAGGGCACGCCATGCCAGCCGGGCCGCCGAC                |
| Environmental<br>XZS47381.b1 | sequence | AAFX01060826.1 | 640-727 | CGCTGCCCAGAGCAAACCGGTTGGAAACACCGGGACGCAGAGCCACGGAGCTTCGGCGCACACGCGCCATGCCAGCCGGGCCGCCAGC                     |
| Environmental<br>XZS52754.b1 | sequence | AAFX01027005.1 | 533-615 | CGACGACAAAGGCAAACCCATCGCGAGGTGGGGACGCAAAGCTTCCGGTCTTGCGCAGAGCGTAAGACAGCGGAGTTACCGAA                          |
| Environmental<br>XZS56734.b1 | sequence | AAFX01068332.1 | 106-22  | AAACGACAAGGGCACACCTCGTGTGAACGAGGCTCGCAAAGCCGACAGAGGTCATGGACCGTTATTGACCTGGCTGGGTACCGAA                        |
| Environmental<br>XZS57554.b1 | sequence | AAFX01029657.1 | 103-193 | GTTCGATAAAGGCAAACCTGTCGAAAGGCAGGGACGCAAAGCCATGGGTCTACCGTCACACGTTTGTGACTACGATAGCCAGGTTGCCGAA                  |
| Environmental                | sequence | AAFX01027420.1 | 114-37  | ACACGACAAAGGCAAACCTCGGTGACGGGGGGGCGCAAAGCCCACGGGTCTGCACGTCAGACGGCCGGGCTGCCGAA                                |

|                                                |                |         |                                                                                                                             |
|------------------------------------------------|----------------|---------|-----------------------------------------------------------------------------------------------------------------------------|
| XZS72112.b1                                    |                |         |                                                                                                                             |
| Environmental sequence<br>XZS89381.y1          | AAFX01098341.1 | 792-705 | ATCGGATGAAGCCAAAACCGGTGAAAGCCGGCGACGCAAAACCATGGTCTAACCGTCACAAAGTGACTATGACCCCAAGGCCGCCGAA                                    |
| Environmental sequence<br>XZS92507.b1          | AAFX01019119.1 | 769-857 | GCGCCTCAAGGGCAAACCATCGAAAGGTGGGGACGCAAAAGCCTCCGGGCTAATGGTTCGCGAGAACCAATGCTAGCGGGGCCGCCGGC                                   |
|                                                |                |         |                                                                                                                             |
| Epibiont metagenome<br>Alv_AA_004_C11.y01      | AAUQ01088527.1 | 217-136 | GAGCTACAAGGCCAAACCGTCGTGAGACGGGGACGGAACCATGGGTCTCCAGCTTGCTGGAGATCGCCAGGTTGCCGGT                                             |
| Epibiont metagenome<br>Alv_AB013_F01.y01       | AAUQ01123481.1 | 377-303 | TTTTGTAAAGCCAAACCTGCCGTGAGGTAGGGACGGAAGTCACAGGTCTTACCAAGACAGCTGGACTGCCTTC                                                   |
| Epibiont metagenome<br>Alv_LSA_034_B05.x01     | AAUQ01060006.1 | 83-158  | TTTTGTAAAGCCAAACCGTCTGTGAGGTAGGGACGGAAGTCACAGGTCTTACCAAGATAGCTGGACTGCCTTT                                                   |
| Epibiont metagenome<br>Alv_LSA_098_F08.y01     | AAUQ01032159.1 | 251-325 | CTATGTCAAAGCCAAACTCGTTGCGAAACGGGGACGGAAGCTACGGGTCTCTAGCAGATAGCCGGGTTACCATG                                                  |
| Epibiont metagenome<br>ALV_LSA_109_E13.X01     | AAUQ01123772.1 | 205-122 | AACTGTTAAAGCTAAACCTATTGTGAAATAGGGACAGAAAGTCACAGGTCTTTTAACTTATACTAAGACGGCTGGCTGCCCTT                                         |
| Epibiont metagenome<br>Alv_LSA_178_B02_D03.y01 | AAUQ01126501.1 | 26-100  | TAAGATAGTCGCCAAACTGGTCGAGAGGTCAGGACGGAAGCCACGGGTCTTGTAGAGATAGCCGGGTTGCAACA                                                  |
| Epibiont metagenome<br>Alv_LSA_182_N11.x01     | AAUQ01051993.1 | 754-636 | AAGGTTAGTCCCCAAATCTGTTGTGAAGCAGGGACGGAAGCTATGGGTCTTATCCTCAAATAACAATAATATCCAAATCTAGATTGGTCTGAAGTGGATA<br>AGATTGCCAGGTTGCCATC |
| Epibiont metagenome<br>Alv_LSA_184_J16.x01     | AAUQ01020220.1 | 33-117  | GGTAAGTGTGGCCAACCTATCGCAAGGTAGGGACGGAAGCCACGGGACTCTGCAAATTTTAAAGAGTTAGCCGGGTTGCCTCT                                         |
| Epibiont metagenome<br>Alv_LSA_247_G12.y01     | AAUQ01039183.1 | 600-681 | GTAGTAAATAGCCAAACCAATCGCGAGGTTGGGACGGAAGCCTTGGGTCTTAATTAAATAGAAGATTGCCAGGTTGCCACT                                           |



|                                            |                |           |                                                                                       |
|--------------------------------------------|----------------|-----------|---------------------------------------------------------------------------------------|
| Epibiont metagenome<br>ALV_LSA_347_I06.y01 | AAUQ01059428.1 | 79-2      | GTGTTTATTTGCCAAACCTATCGCGAGGTAGGGACGGAAAGGCCATGTAAAGCTCAAGGAGATCGACAGGTTGCTAAA        |
| Epibiont metagenome<br>ALV_LSA_396_J12.x01 | AAUQ01061271.1 | 74-1      | TAATGAAAAGGCCAAACCTGTTGCAAAATAGGGACGGAAAGCCACGGAGGTCTTGTAGATAGCCGGGTTGACCA            |
| Epibiont metagenome<br>ALV_LSB_173_A09.x01 | AAUQ01090257.1 | 93-175    | GAGCTACAAGGCCAAACCCGTCGTGAGAGCGGGGACGGAAACCATGGGTCTCCAGCTTGCTGGAATCGCCAGGTTGCCGGT     |
| Epibiont metagenome<br>Ctg1022.2           | AAUQ01001550.1 | 1553-1638 | GTAAAGTGTGGCCAAACCTATCGCAAGGTAGGGACGGAAAGCCACGGGACTCTGCAAATTTTAAAGAGTTAGCCGGGTTGCCTCT |
| Epibiont metagenome<br>Ctg1316.1           | AAUQ01021274.1 | 921-1002  | GTAGTAAATAGCCAAACCAATCGCGAGGTTGGGACGGAAAGCCTTGGGTCTTAATTAATAGAAGATTGCCAGGTTGCCACT     |
| Epibiont metagenome<br>Ctg19241.1          | AAUQ01076621.1 | 419-497   | ATTTGAAAAGGCCAAACCATCCGTGAGGGTGGGACGGAAAGCCACGGATCTTAATTAATAAGACAGCCGGGTTGCCAAA       |
| Epibiont metagenome<br>Ctg2012.2           | AAUQ01016272.1 | 1214-1140 | CTGTGTAAAGCCAAATTCGTGCGAGGCGGGGACGGAAAGCCACGGGTCTCTCTGAGATAGCCGGGTTGCCATA             |
| Epibiont metagenome<br>Ctg2036.2           | AAUQ01029484.1 | 925-999   | CTATGTTGTGGCCAAATTCGTGCGAGGCGGGGACGGAAAGCCACGGGTCTCTCTGAGATAGCCGGGTTGCCATA            |
| Epibiont metagenome<br>Ctg2354.2           | AAUQ01092265.1 | 84-10     | CTATGTTAAAGCCAAATTCGTGCGAGGCGGGGACGGAAAGCCACGGGTCTCTCTGAGATAGCCGGGTTGTCATA            |
| Epibiont metagenome<br>Ctg3910.1           | AAUQ01009368.1 | 695-621   | CTACGTAAAGCCAAATTCGTGCGTAGGTGGGGACGGGAAGCCACGGGTTTCTCTGAGATAGCCGGGTTATCATA            |
| Epibiont metagenome<br>Ctg4370.1           | AAUQ01032061.1 | 278-359   | GAGCTACAAGGCCAAACCCGTCGTGAGACGGGGACGGAAACCATGGGTCTCCAGCTTGCTGGAGATCGCCAGGTTGCCGGT     |
| Epibiont metagenome<br>Ctg647.2            | AAUQ01000252.1 | 5041-4952 | AACTGTTAAAGCTAAACCTATTGTGAAATAGGGACAGAAAGTCACAGGTCTTTTAACTTAAATGTAAGACGGCTGGACTGCCCTT |
| Epibiont metagenome                        | AAUQ01011702.1 | 1423-1349 | TAATGAAAAGGCCAAACCTGTTGCAAAATAGGGACGGAAAGCCACGGATCTTGTAGATAGCCGGGTTGCCATA             |

|                                          |                |                 |                                                                                              |
|------------------------------------------|----------------|-----------------|----------------------------------------------------------------------------------------------|
| Ctg866.3                                 |                |                 |                                                                                              |
| Epibiont metagenome<br>Ctg908.1          | AAUQ01000609.1 | 4009-3927       | AAATGTAGTTGCCAAACCTACTGTGAAGTGGGGACGAAAGCCAATGAGTCTTGATTAAGTACAAGATAGTCAGGTTGCCACT           |
| Epibiont metagenome<br>Ctg9365.1         | AAUQ01069258.1 | 333-249         | AGGCATTAAAGCCAAACCATTCTGTGAGAATGGGACGGAAAGCTACGGGTCTCTCGATGTTTTGAAGAGATAGCCGGGTTGCCATA       |
|                                          |                |                 |                                                                                              |
| Ethanoligenens harbinense<br>YUAN-3      | CP002400.1     | 58174-58090     | AAAATGTATCGGCAAACCCGTCGAAAGGCGGGGACGCAAAGCCACGGGTCTAATGTTTCATCACGATGATAGCCGGGTTGCCTTT        |
| Ethanoligenens harbinense<br>YUAN-3      | CP002400.1     | 2083110-2083198 | TATCAGAAAAGGCAAACCTGACCGAAAGGCAGGGGCATAAAGCCAAGAGTCTAAGGTAAATAACGTACTATGATAGTCTGGTTGCAAAA    |
| Ethanoligenens harbinense<br>YUAN-3      | CP002400.1     | 44570-44660     | TATTGTAAATAGCAAACCTTGTCGAAAGGCAGGGGCGCAAAGCTACGGGTCTAATGCTTCCGTTCCGAAGCGATGATCGCCGGGTTGCCATT |
|                                          |                |                 |                                                                                              |
| Eubacterium cellulosolvens<br>6 ctg00005 | AEOA01000041.1 | 2611-2529       | TTAATTGCATAGCAAACCTGTAGTGATGCAGGGACGCAAAACCGTGAGTCACGAGGTTGTTTCGTGATTGTCTGGCTGCATTC          |
| Eubacterium cellulosolvens<br>6 ctg00006 | AEOA01000049.1 | 5379-5297       | TTAATTACATAGCAAACCTGTAGTGATGCAGGGACGCAAAACCGTGAGTCACGCGTTCCGGTGCGTGATTGTCTGGCTGCATTC         |
| Eubacterium cellulosolvens<br>6 ctg00012 | AEOA01000061.1 | 3000-3082       | TTAATTGCATAGCAAACCTGTAGTGATGCAGGGACGCAAAACCGTGAGTCACGAGGCAGTTTCGTGATTGTCTGGCTGCAATC          |
| Eubacterium cellulosolvens<br>6 ctg00051 | AEOA01000012.1 | 47756-47830     | TCAAATCAAAGGCAAAACAGACGAAAGTCTGTGACGCAAACTATAGGGGCCGAAATAGCCAGCCAGTTGCATTC                   |
| Eubacterium cellulosolvens<br>6 ctg00060 | AEOA01000026.1 | 43622-43547     | AATAGTGATGGCAAAACAGACGAAAGTCTGCGACGCAAGCTAAAGGGACTGTAAAATGTCAGCCAGCTGCAATA                   |
| Eubacterium eligens ATCC<br>27750        | CP001104.1     | 398951-399037   | TTAATATGTTGGCAAAGTAGTCGAAAGGCTATGACGCAAGCCAAGGGTCTTAAGTATTTTATCAGAATGACAGCCGGTTGCATTA        |

|                                                          |                |                 |                                                                                                                                                |
|----------------------------------------------------------|----------------|-----------------|------------------------------------------------------------------------------------------------------------------------------------------------|
| Eubacterium eligens ATCC<br>27750                        | CP001104.1     | 1345607-1345470 | AAGTAAATATGGCAAACCTTATAGAAATATAAGGACGCAAACTAGAAAGTCTAGAGGTATAAAGCTGAAAAACACTATTTTCAGTTGAGAGATTACATAA<br>GCATAAGTCTCTAATACTATGATAGTTCGGTTGCATTA |
| Eubacterium eligens ATCC<br>27750                        | CP001104.1     | 545635-545750   | ACAAAAGAGGGGTAAACCTGCAGAAATGCAGGGACACAAAGCTACAAGTCTAAGTTGATTAGTAGTCTGGGGAGTATTGGATATATTGAAGATATAAG<br>ATGGTTGAGTTGCAGAT                        |
| Eubacterium hallii DSM<br>3353 E_hallii-1.0_Cont31.1     | ACEP01000029.1 | 46847-46922     | TAAGGAAATCGGCAAACCAGATGAAAGTCTGGGACGCAAAGCTACAGGGCCTGTAAAATGGCAGCCAGATGCATAA                                                                   |
| Eubacterium hallii DSM<br>3353<br>E_hallii-1.0_Cont365.1 | ACEP01000106.1 | 6720-6802       | TGTTCTAGTGGGCAAACCTTGTGAAAGCAGGGGACGCAAAGCCAAGGGTCTAAGGGCATAGCCTATGACAGCCGGTTGCCGCG                                                            |
| Eubacterium hallii DSM<br>3353 E_hallii-1.0_Cont53.1     | ACEP01000048.1 | 3328-3234       | TTTATATTTGGGTAAAACTGTGCGAAAGGCAGCGACACAAAGCCAAATGGGTCTAAGGTTCAITTTTTTAAGAGAATTATGACAGCCGGTTGCATCA                                              |
| Eubacterium hallii DSM<br>3353 E_hallii-1.0_Cont54.1     | ACEP01000049.1 | 11891-11966     | TAGGATAATCGGCAAACCAGATGAAAGTCTGGGACGCAAAGCTACAGGGTCTTTAAAATGGCAGCCAGCTGCATGA                                                                   |
| Eubacterium hallii DSM<br>3353 E_hallii-1.0_Cont78.1     | ACEP01000072.1 | 439-349         | ATTATTTAAAGGCAAATCTGCTGAAAGGCAGGGACGCAAAGTTAGAAGGGGCTAAAGTCAGAAAGATTGACCAGGTCAGCCAGTTGCCACT                                                    |
| Eubacterium hallii DSM<br>3353 E_hallii-1.0_Cont78.1     | ACEP01000072.1 | 10388-10313     | TAAGGAAATCGGCAAACCAGATGAAAGTCTGGGACGCAAAGCTACAGGGCCTGTAAAATGGCAGCCAGTTACATGA                                                                   |
| Eubacterium limosum<br>KIST612                           | CP002273.1     | 3827128-3827035 | TTGTTCAAAAGGCAAAGCGGTGCGAAAGCCCGTGGCGCAAACTACAGGGTCTACGTCGGAAGCTCCAGGCCGATATGACAGCCAGATGCCACA                                                  |
| Eubacterium limosum<br>KIST612                           | CP002273.1     | 2529297-2529210 | ACGTAAAAAGGGCAAATCTGTTGAAAGGCAGAGACGCAAACTAAAGGGCCTAAAACCGGTAACCGGTAATGGCAGCCAGCTGCTACG                                                        |
| Eubacterium limosum<br>KIST612                           | CP002273.1     | 1003350-1003430 | TTAATATCAGGGCAAATCTGTTGAAAGACAGAGACGCAAAGCTAAAGGGCCTAAACAACCACTATCAACTGGGCTGCAGTT                                                              |
| Eubacterium limosum<br>KIST612                           | CP002273.1     | 4247327-4247414 | TTTGAAATAGGGCAAACTACTGAAAGGTAGTGACGCAAAGCCAAGGGTCTAATTCATCTCAAGATGAAACGACAGCCGGTTGCTCGG                                                        |

|                                                |            |                 |                                                                                                              |
|------------------------------------------------|------------|-----------------|--------------------------------------------------------------------------------------------------------------|
| Eubacterium rectale ATCC<br>33656              | CP001107.1 | 255854-255958   | ATCAAATTAGGGCAAACCTTATGGAAACGTAAGGACGCAAACATGAAGTCTAAGTAATAAAATAAAATACACGTATTTATTATATTGACGGTTCGGTTGC<br>AATG |
| Eubacterium rectale ATCC<br>33656              | CP001107.1 | 551418-551509   | TGTATAAAAGGGCACACTTATGGAAACGTAAGGTCGCAAAGCTAGAGTCTAACACGGAGTAACATTTATGTAATGACAGATCGGCTGCAACA                 |
| Eubacterium rectale ATCC<br>33656              | CP001107.1 | 553720-553811   | CGTATAAAAGGGCACACTTATGGAAACGTAAGGTCGCAAAGCTAGAGTCTAACACGGAGTAACATTTATGTAATGACAGATCGGCTGCAACA                 |
| Eubacterium rectale ATCC<br>33656              | CP001107.1 | 549360-549451   | CATATAAAAGGGCACACTTATGGAAACGTAAGGTCGCAAAGCTAGAGTCTAACACGGAGTAACATTTATGTAATGACAGATCGGCTGCAACA                 |
| Eubacterium rectale ATCC<br>33656              | CP001107.1 | 3157371-3157283 | TAACCATAAAGGCACACTTATGGAAACATAGGTCGCAAAGCCAGAGTCTAAAACAGTTACATGTAGTAATGACAGTTCGGCTGCAACA                     |
| Eubacterium rectale ATCC<br>33656              | CP001107.1 | 3151655-3151567 | TAACCATAAAGGCACACTTATGGAAACGTAAGGTCGCAAAGCCAGAGTCTAAAACAGTTACATGTAGTAATGACAGTTCGGCTGCAACA                    |
| Eubacterium rectale ATCC<br>33656              | CP001107.1 | 769967-770055   | TAACCATAAAGGCACACTTATGGAAACGTAAGGTCGCAAAGCCAGAGTCTAAAACAGTTACATGTAGTAATGACAGTTCGGCTGCAACA                    |
| Eubacterium rectale DSM<br>17629 draft genome. | FP929042.1 | 237482-237573   | CGTATAAAAGGGCACACTTATGGAAACGTAAGGTCGCAAAGCTAGAGTCTAACACGGAGTAACATTTATGTAATGACAGATCGGCTGCAACA                 |
| Eubacterium rectale DSM<br>17629 draft genome. | FP929042.1 | 505578-505666   | TAACCATAAAGGCACACTTATGGAAACATAGGTCGCAAAGCCAGAGTCTAAAACAGTTACATGTAGTAATGACAGTTCGGCTGCAACA                     |
| Eubacterium rectale DSM<br>17629 draft genome. | FP929042.1 | 169765-169853   | TAACCATAAAGGCACACTTATGGAAACGTAAGGTCGCAAAGCCAGAGTCTAAAACAGTTACATGTAGTAATGACAGTTCGGCTGCAACA                    |
| Eubacterium rectale DSM<br>17629 draft genome. | FP929042.1 | 235157-235248   | CGTATAAAAGGGCACACTTATGGAAACGTAAGGTCGCAAAGCTAGAGTCTAACACAGAGTAATATTTATGTAATGACAGATCGGCTGCAACA                 |
| Eubacterium rectale M104/1<br>draft genome.    | FP929043.1 | 1314013-1313914 | ATGAAATATGGGCAAACCTTATGGAAACATAAGGACGCAAAGCATGAAGTCTAAGTAATAAAATGTGCACATTTATTATATTGATGGTTCGGTTGCAATG         |
| Eubacterium rectale M104/1                     | FP929043.1 | 2434515-2434427 | CACCTATCAAGGCACACTTATGGAAACATAAGGTCGCAAAGCCAGAGTCTAAAACAGTTACACGATGTAATGACAGATCGGCTGCATCA                    |

|                                                                            |                |                 |                                                                                               |
|----------------------------------------------------------------------------|----------------|-----------------|-----------------------------------------------------------------------------------------------|
| draft genome.                                                              |                |                 |                                                                                               |
| Exiguobacterium sp. AT1b                                                   | CP001615.1     | 1052296-1052220 | CACTGATAATGGCAAACTACGCGAAAGCTAGTGACGCAAAGCTACAGGGCCTGTAAAATGGCAGCCAGTTTCCAAA                  |
| Exiguobacterium sp. AT1b                                                   | CP001615.1     | 1190640-1190725 | TATCGAGACGGGCAAACCTTACTGAAAAGTAAGGGCGCAAAGACATGGGTCGTCGATCTTTTAGATACCGATCGCCAGTCTGCAATA       |
| Faecalibacterium prausnitzii<br>A2-165<br>F_prausnitzii-1.0.1_Cont1.5      | ACOP02000031.1 | 16629-16554     | GAATATCCTCGGCAAAGCAGTCGAAAGGCTGTGACGCAAAGCTATAGGGCCTGTAAAATGGCAGCCAGTTGCTTCT                  |
| Faecalibacterium prausnitzii<br>A2-165<br>F_prausnitzii-1.0.1_Cont1.5      | ACOP02000031.1 | 16830-16755     | GAATATCTCGGCAAACAGTCGAAAGGCTGTGACGCAAAGCTACAGGGCCTGTAAAATGGCAGCCAGCTGCTTCT                    |
| Faecalibacterium prausnitzii<br>A2-165<br>F_prausnitzii-1.0.1_Cont2.7      | ACOP02000047.1 | 24777-24703     | CAGAAGAATCGGCAAACCAGCTGGAAGGCTGCGACGCAAAGCTAAAGGGCCAGACCGGGCAGCCAGCTGCACTT                    |
| Faecalibacterium prausnitzii<br>A2-165<br>F_prausnitzii-1.0.1_Cont3.1<br>6 | ACOP02000057.1 | 13486-13411     | TTGAAGAACCGGCAAACCAGCCGAAAGGCTGCGACGCGAAGCTATAGGGCCTGTAAGATGGCAGCCAGTTGTATTT                  |
| Faecalibacterium prausnitzii<br>A2-165<br>F_prausnitzii-1.0.1_Cont4.4      | ACOP02000073.1 | 63838-63914     | CTGAAGAATCGGCAAGCCAGTCGAAAGGCTGCGACGCAAAGCTACAAGGGCCTGTAATATGGCAGCCAGCCGCACGT                 |
| Faecalibacterium prausnitzii<br>A2-165<br>F_prausnitzii-1.0.1_Cont6.6      | ACOP02000082.1 | 2089-2164       | AGAAAAAACGGCAAACCAGTCGAAAGGCTGCGACGCAAAGCTACAGGGCCTGTAATATGGCAGCCAGCCGCACTT                   |
| Faecalibacterium prausnitzii                                               | FP929045.1     | 3143612-3143705 | AATCGTTGTTGGCAAACCTGATGTGAGTCAGGGACGCAAAGCCAGGAGCTTTCTGCTTTATTTCTGCAAGCAGAAGGTAGTTCGGCTGCAATA |

|                                                                                |                |                 |                                                                                                   |
|--------------------------------------------------------------------------------|----------------|-----------------|---------------------------------------------------------------------------------------------------|
| L2/6 draft genome.                                                             |                |                 |                                                                                                   |
| Faecalibacterium prausnitzii<br>L2/6 draft genome.                             | FP929045.1     | 2779134-2779225 | CTTAATACTTGGTAAACCTACCGAAAGATAGGGCAACAAAGCCAAATGAGTCTAAAATCTCATATACGAGGTCATGGCAGCTGGTTGCTTTT      |
| Faecalibacterium prausnitzii<br>L2/6 draft genome.                             | FP929045.1     | 2072446-2072371 | TAGAATATTTAGCAAAGCAGTTGAAAAGCTGTGACGCAAAGCTAAAGGGCCTGTAAAATGGTAGCCAGTTGCATT                       |
| Faecalibacterium prausnitzii<br>M21/2<br>F_prausnitzii_M212-2.0.1_<br>Cont30.1 | ABED02000012.1 | 2557-2651       | GCAATTTTTTGGCAAACCTTGTCGAAAGGCAAGGACGCAAAGCCATAGGGGCTAAGGTTTCGGGGCATTTCCCGGATGATGCCAGCCGGTTGCTTCC |
| Faecalibacterium prausnitzii<br>SL3/3 draft genome.                            | FP929046.1     | 1805030-1805124 | GCAATTTTTTGGCAAACCTTGTCGAAAGGCAAGGACGCAAAGCCATAGGGGCTAAGGTTTCGGGGCATTTCCCGGATGATGCCAGCCGGTTGCTTCC |
|                                                                                |                |                 |                                                                                                   |
| Ferrimonas balearica DSM<br>9799                                               | CP002209.1     | 739797-739890   | ACGTGATAAAGGCAAACCCGGCGAAAGCCGGTGACGCAAAGCCACCGGCCTAAGGTGCCCTGTAGGGGGTGCGATGGCAGCGGGGTACCGCA      |
| Ferrimonas balearica DSM<br>9799                                               | CP002209.1     | 2762199-2762116 | CGACGAAAAAGGCAAACCAGGTGAAAGCCTGGGACGCAAAGCCTCCGGTCTAAGGTGAACGCTATCGATAGCGGGGTGCCGAG               |
| Ferrimonas balearica DSM<br>9799                                               | CP002209.1     | 2783819-2783902 | CTGTGATAAAGGCAAACCGGTCGAAAGGCCGGGACGCAAAGCCTCCGGTCTAAGGGCATCGCCTAAGATAGCGGGGATACCATA              |
|                                                                                |                |                 |                                                                                                   |
| Filifactor alocis ATCC<br>35896                                                | CP002390.1     | 860021-859940   | TAATTTTTCCGTCAAAGCATTTGAAAGAATGTGACGCAAAGCTAAAGTGCTTAAGTTAATTATATGGTTGCCAGTTGCACGT                |
|                                                                                |                |                 |                                                                                                   |
| Fish metagenome 9220464                                                        | ABMZ01023210.1 | 1-92            | CGACAAAGGCAAAGCTGGCGAAAGCCAGTGACGCAAAGCTAAAGGGGCTTCCTTGCTCCTGCAAATCGGACTCGCAGCCAGCCAGCCGCCGAA     |
| Fish metagenome 9485294                                                        | ABMZ01002837.1 | 12-92           | CCACGATAATGGCAAAACCGTTTAAAGGCGGTGACGCAAAGCTAGAGGGGCTAAGGGAACTATGCCAGCCAGCTATTAAA                  |
| Fish metagenome 9503073                                                        | ABNA01040436.1 | 45-101          | AATGAACAAAGGCAAATCCATCGAAAGGTGGAGACGCAAAGCCACGGGTCTAAGCCA                                         |

|                                                                      |                |         |                                                                                     |
|----------------------------------------------------------------------|----------------|---------|-------------------------------------------------------------------------------------|
| Fish metagenome 9509352                                              | ABNA01033708.1 | 1-82    | AAGCTGGCGAAAGCCAGTGACGCAAAGCTAAAGGGGTCTTCCTTGTCTGCAAATCGGACTCGCAGCCAGCCAGCCGCCGAA   |
|                                                                      |                |         |                                                                                     |
| Fossil metagenome<br>sequence<br>DNPX6MG02DRVOW                      | CAAM02049685.1 | 66-1    | CACTGAAAATGGCAAACCCGTCGAAAGGCGGGACGCAAAGCAACGGGCCTACGGGCCGGCACTGA                   |
|                                                                      |                |         |                                                                                     |
| Freshwater metagenome<br>43458779                                    | ABMW01042130.1 | 42-1    | TGATGAAAATGGCAAACCTACGTGAAAGCGTAGGACGCAAAAC                                         |
| Freshwater metagenome<br>43885243                                    | ABMW01041290.1 | 3-76    | GGCAAACCTTGTCGAAAGACAAGGACGCAAAGCTTCCGGCCTAAGGTCTTCGATCATGGTAGCGGGGTTTCCAAG         |
| Freshwater metagenome<br>43888827                                    | ABMW01158621.1 | 80-1    | TATTTTAAAAGGCAAACCTGTATGAAAATGCAGGGCGCAAAGCCACATATCTGACGGTACAAGTTACACAAGAACGATGAG   |
| Freshwater metagenome<br>June_2007_contig01412                       | ADVU01001405.1 | 171-231 | TACTGACAAAGGCAAACCCGCCGAAAGGCGGGCGCAAAGCTACAGGGCCTACCGGCGCG                         |
|                                                                      |                |         |                                                                                     |
| Freshwater sediment<br>metagenome<br>lwFormaldehyde_BCIB1690<br>2_y1 | ABSN01036975.1 | 361-279 | TTTGACTAAGACCAAACCTGCCGTAAGGCAGAGACGGAATGTTACGGGTCTTGGCCTAATTCCAAGATAGCCGGACTGCCGAG |
| Freshwater sediment<br>metagenome<br>lwFormaldehyde_BCIB2785<br>8_b1 | ABSN01046431.1 | 108-182 | GTTATGGAAGGCCAAACCTATCGCAAGGTAGGGGCAGAAAGTCGCGGATCCCATGCGGAAAGCCGGACTGCCGAA         |
| Freshwater sediment<br>metagenome                                    | ABSN01015815.1 | 21186   | CACCGATAAAGGCAAACCCCTGAGTGATCGGGGGGCGCAAAGTAAAGGGTCTTAAACTT                         |

|                                                                      |                |         |                                                                                         |
|----------------------------------------------------------------------|----------------|---------|-----------------------------------------------------------------------------------------|
| lwFormaldehyde_BCIB2841<br>_b1                                       |                |         |                                                                                         |
| Freshwater sediment<br>metagenome<br>lwFormaldehyde_BCIB2966<br>7_b1 | ABSN01049753.1 | 226-311 | CCTCGATAAGGGCAAACCGACAGCAATGTCGGGGCGCAAAGCCAAGGGCCGACGTTCTTCGGAGCGGGCGCAGCCTGGTTGCCGAA  |
| Freshwater sediment<br>metagenome<br>lwFormaldehyde_BCIB3253<br>9_b1 | ABSN01055035.1 | 510-595 | AGTAAAAAGGGTAAACCCGACTGAAAAGCGGGGACGCAAAGCTACCGGTCTAAAGGAGAAATTCCATGACAGCGGGGTACCGAA    |
| Freshwater sediment<br>metagenome<br>lwFormaldehyde_BCIB3451<br>0_b1 | ABSN01058586.1 | 679-604 | GACACGAAAAGGCACACCCGTCGCGAGACGGGGCCGCAAAGCTACGGGCTTGAAACAGGCGGCCGAGCTGCCGAT             |
| Freshwater sediment<br>metagenome<br>lwFormaldehyde_BCIB4238<br>7_b1 | ABSN01070577.1 | 628-706 | AATATTAAAGCCAAACCTAACGTAAGTTAGGGACGGAATGTTACGAATCCAAACGGTTTGAAAGTCGGACTGCCGAG           |
| Freshwater sediment<br>metagenome<br>lwFormaldehyde_BCIB7115<br>_y1  | ABSN01023000.1 | 411-491 | TAAATTAAATGCCAAACCTATTGTAAAGTAGGGACGGAAAGCCACGGGTCTAAGATGTTTCAGGATGGCCGGGTACGATT        |
| Freshwater sediment<br>metagenome<br>lwFormaldehyde_BHFI7763         | ABSN01004832.1 | 594-507 | GTCTGAAAAGGGCAAACCCGCCGCAAGGCGGGGACGCAAAGCCTCCGGTCCGGGCCGCAAGTGAGCGACGGATAGCGGGTTGCCAGC |



|                                                                     |                |         |                                                                                                                |
|---------------------------------------------------------------------|----------------|---------|----------------------------------------------------------------------------------------------------------------|
| _g1                                                                 |                |         |                                                                                                                |
| Freshwater sediment<br>metagenome<br>lwFormaldehyde_BHF18094<br>_b1 | ABSN01005451.1 | 71-1    | CTGGCGAAATGGCACACCCGCTGCGAGGCGGGGTCGCAAAGCCACGGGTCTCTGCTCCAGGACGACCGCC                                         |
| Freshwater sediment<br>metagenome<br>lwFormaldehyde_BHF18094<br>_b1 | ABSN01005451.1 | 214-302 | TTCGTACAAGGGCAAACCCATCGAAAGGTGGGGACGCAAAGCTTCCGGGCTACCGACTGAAATCAGTCCATGCCAGCGGGGTGCCGGC                       |
| Freshwater sediment<br>metagenome<br>lwFormaldehyde_BHF18452<br>_b1 | ABSN01006073.1 | 811-732 | ATAACGCCAACCACGCCGAAAGGCGTGACGAAAAGCCGCGGATCTCCAGAACTGATCTGAGACAGCCGGGCTGCCGAA                                 |
| Freshwater sediment<br>metagenome<br>lwFormaldehyde_BHF19017<br>_g1 | ABSN01007106.1 | 521-597 | TTTTTTTAAAGGCCAAACCTATTGTAAGGTAGGGGCAGAAAGTCGCGGGTCCTATCAACGGAAAGCCGGACTACCGAA                                 |
| Freshwater sediment<br>metagenome<br>lwFormaldehyde_C1055           | ABSN01001055.1 | 373-288 | ATATTTAAAGGGCAAACCTCGACTGAAAAGCGAGGACGCAAAGCCTCCGGTCTAAAGGAGAAATCCTATGACAGCGGGGCCACCGTA                        |
| Freshwater sediment<br>metagenome<br>lwFormate_BCIX894_g1           | ABSO01011129.1 | 274-348 | AGGCGTAAAGGGCAAACCACTTGCGAAGGTGGGGCGCAAAGCTACAGGGCTCTCAGAGCCGGCTGGGCTGCCGCC                                    |
| Freshwater sediment<br>metagenome                                   | ABSO01011567.1 | 290-395 | AACAAGAAAAGGCACACCCGTTGAAAGGCGGGGCCGCAAAGCCACGGAGCCTCATCGCATCCGCCACAACGACGTGGCGGCCGCGACGGCGAGCCG<br>AGCTGCCGAG |

|                                                                 |                |         |                                                                                                |
|-----------------------------------------------------------------|----------------|---------|------------------------------------------------------------------------------------------------|
| lwFormate_BCIX9362_b1                                           |                |         |                                                                                                |
| Freshwater sediment<br>metagenome<br>lwMethane_BCGO10124_x<br>1 | ABSP01016915.1 | 460-546 | TCCTGCACAGAGCAAACCCGGGGCGACCCGGGGACGCAGAGCCACGGGGCCCCCGGAAGAGGGCGGGGGTCAGCCGAGCCGCCGGG         |
| Freshwater sediment<br>metagenome<br>lwMethane_BCGO11720_x<br>1 | ABSP01019593.1 | 117-24  | CTGAAAACAGGGCAAACCCGCCGAAAGGCAGGGGCGCAAAGTCACCCGCCTAAAGGACGCAGCAAGCGCGTCACATGGCAGCGGAACCACCAGG |
| Freshwater sediment<br>metagenome<br>lwMethane_BCGO15226_y<br>1 | ABSP01025478.1 | 869-792 | TTTACTAAAGCCAAACCTATTGTAAGTTAGGGGCAGAAAGTCGCGGATCCAGAATAACGGAAAGCCGGACTGCCGAA                  |
| Freshwater sediment<br>metagenome<br>lwMethane_BCGO20968_y<br>1 | ABSP01035114.1 | 135-57  | AAAAATTAAAGCTAAACCCACCGTGAGTTGGGGGCAGAAAGTTGCGAATCCAGAATGTTTGGAAGTCGGACTGCCGAG                 |
| Freshwater sediment<br>metagenome<br>lwMethane_BCGO23047_x<br>1 | ABSP01038606.1 | 131-221 | CCTCGATAACGGCACGACGATCGAAAGGTCGCTCACGCAAAGCTTTGGAGCCTCGCGGCGCTCGCGCGCCTACGGCAGTCCGGCCGCCGAA    |
| Freshwater sediment<br>metagenome<br>lwMethane_BCGO25644_y<br>1 | ABSP01042952.1 | 785-700 | TCTTGATCGCGGCAAACCTGTGCGAAAGGCAGGGACGCAAAGCCTCCGGTCCGAGGGACGGATGTCTTGATAGCGGGGTTGCCAG          |

|                                                                 |                |         |                                                                                        |
|-----------------------------------------------------------------|----------------|---------|----------------------------------------------------------------------------------------|
| Freshwater sediment<br>metagenome<br>lwMethane_BCGO26278_y<br>1 | ABSP01044018.1 | 238-321 | TGATAGCAACGCCAAACCTATCGTAAATTAGGGACGGAAAAGTCGCGTATCCAGACTAAGAATAATGGAAAGCCGGACTGCCGAA  |
| Freshwater sediment<br>metagenome<br>lwMethane_BCGO26841_y<br>1 | ABSP01044985.1 | 654-567 | ACTGATCAAGGGCAAACCCGCCGGAAGGCGGGACGCAAAGCCTCCGGTCTCGGGCGTGACGCGCCACGGATAGCGGGGTTGCCAGT |
| Freshwater sediment<br>metagenome<br>lwMethane_BCGO27296_x<br>1 | ABSP01045765.1 | 124-41  | TGCATTAAAGGTCAAACCTGTTGAAAAACAGGGGCGCAAAGTTACCAGTCTAAGGGTTTATACCTAAGACAGTGGGGTGCCGTT   |
| Freshwater sediment<br>metagenome<br>lwMethane_BCGO27771_x<br>1 | ABSP01046580.1 | 581-504 | GATAATCAATACTATACCTATGGTAACGTAGGGACAGAAAGTCACGGGTCTAAATTTAGGAAAGCCGAAGTCCCGAG          |
| Freshwater sediment<br>metagenome<br>lwMethane_BCGO27843_y<br>1 | ABSP01046708.1 | 295-373 | AAATAATAACGCCAAACCTATCGTAAGGTAGGGACAGAAAGTTGCGGATCCTCTGATTACAGGAAAGCCGGACTGCCGAA       |
| Freshwater sediment<br>metagenome<br>lwMethane_BCGO28164_x<br>1 | ABSP01047252.1 | 410-495 | TCTGATAAAGGGCAAACCCGATCGAAAGGCGGGCTCGCAATGTCACCGGTCTAAAGGCGAAAGCCAATGACGGCGGGACTGCCAGA |
| Freshwater sediment                                             | ABSP01051733.1 | 671-745 | ATCAGAAAACGCCAAACCTGTGCGGAGGCAGGGACGGAAAGCCACGGATCTCTCGAAGACCGCCGGGTTGCCTGA            |

|                                                                  |                |         |                                                                                          |
|------------------------------------------------------------------|----------------|---------|------------------------------------------------------------------------------------------|
| metagenome<br>lwMethane_BCGO31799_y<br>1                         |                |         |                                                                                          |
| Freshwater sediment<br>metagenome<br>lwMethane_BCGO31910_x<br>1  | ABSP01051928.1 | 584-507 | AAATAATAAAGCTAAACCTATCGGAAGGTAGGGACAGAAAGTCGCGGATCCCGAATCACGGAAAGCCGGACTACCGAG           |
| Freshwater sediment<br>metagenome<br>lwMethane_BCGO9377_y1       | ABSP01016195.1 | 210-130 | TTCCCGAAAAGCCAACCGCGCCGTGAGACGCGTGCGGAAAGCCACGGATCCCGCGAGACGCGGGACAGCCGGGTTGCCGAA        |
| Freshwater sediment<br>metagenome<br>lwMethane_C384              | ABSP01000384.1 | 580-658 | ATTATATAAGCCAAACTTATTGTAAGGTAGGGGACAGAAAGTTACGGATTCCATACAAACGGAAAGCCGAAGTACGAA           |
| Freshwater sediment<br>metagenome<br>lwMethenol_BCHA11409_y<br>1 | ABSQ01018261.1 | 232-145 | GTCTTGCGGGGGCAAACCCGTCGAAAGGCGGGGACGCAAAGCCAGCGGGCCTTCGGTCCTCAGGGATCAAGGTGGCCGGGCTGCCAGG |
| Freshwater sediment<br>metagenome<br>lwMethenol_BCHA13039_y<br>1 | ABSQ01020420.1 | 401-315 | TGTTTCAATGGGCAAAACCATCGAGAGATGGTGACGCAAAGCCTCCGGCCACACGCTCGCACGCGATGGGTAGCGGGGTTGCCAGT   |
| Freshwater sediment<br>metagenome<br>lwMethenol_BCHA14489_y<br>1 | ABSQ01022178.1 | 248-172 | TAAAAATCATACTAAACCTATGGTAACGTAGGGACAGAAAGTTATGGATCCTGATTACAGGAAAGCCGAAGTCCCGAG           |

|                                                                  |                |         |                                                                                                                           |
|------------------------------------------------------------------|----------------|---------|---------------------------------------------------------------------------------------------------------------------------|
| Freshwater sediment<br>metagenome<br>lwMethenol_BCHA14514_x<br>1 | ABSQ01022225.1 | 607-519 | CCGGTCGAAGGGCACACCCGCCGAGNCGGGGCCGCAAAGCCACAGCTCTTGATCGTCAATTGAGAACAAGAGGGCTGGGCTGCCGCC                                   |
| Freshwater sediment<br>metagenome<br>lwMethenol_BCHA20496_y<br>1 | ABSQ01031933.1 | 655-731 | ATAAAAAAAGCCAAACCTATTGTAAGGTGGGGGCAGAAAGTCGCGAGTCCTATCAGCGAAAGCCGGACTGCCGAG                                               |
| Freshwater sediment<br>metagenome<br>lwMethenol_BCHA22305_x<br>1 | ABSQ01033693.1 | 429-503 | TGCCGATCAAGCCAAACCCGTCGTGAGACGGGGACGAAAGCCACGGGTCCACCGGGGATAACCGGGTTGCCGAA                                                |
| Freshwater sediment<br>metagenome<br>lwMethenol_BCHA23196_y<br>1 | ABSQ01035196.1 | 249-340 | GCACGAAAAAGGCAAACCATCCGAAAGGGTGGGACGCAAACTACGAGGGCCTTCGTCGCTCGAGAGAGCGAAAAGGCAGCCAGTTGCCGAA                               |
| Freshwater sediment<br>metagenome<br>lwMethenol_BCHA23557_x<br>1 | ABSQ01035821.1 | 535-449 | GTCTGTAAAGGGCAAACCCAGCGAAAGCTGGGGACGCAAAGTCACCGGTCTAAGGGGCGCAGGCCCTACGATAGCGGGATTGCCGGA                                   |
| Freshwater sediment<br>metagenome<br>lwMethenol_BCHA31557_x<br>1 | ABSQ01047381.1 | 903-787 | AAGGGCATACCCGCCGAAAGNCGGGGACGCAAAGCCACCGGTCTAACGACGGTGCGCGCTGGCGCGGCGAGGGATCGCTGCGGCATCGACACCGTCC<br>ACGACAGCGGGGCTGCCGAG |
| Freshwater sediment                                              | ABSR01014820.1 | 687-770 | AGTTGTTAAAAGCAAACCTTATCGAAAGGTAAGCACGCAAAATTACCGGTCTACAGGCTTATGCCATGACAGCGGGATTGCCGGC                                     |

|                                                                     |                |           |                                                                                          |
|---------------------------------------------------------------------|----------------|-----------|------------------------------------------------------------------------------------------|
| metagenome<br>lwMethylamine_BCHP1210<br>0_g1                        |                |           |                                                                                          |
| Freshwater sediment<br>metagenome<br>lwMethylamine_BCHP3033<br>0_g1 | ABSR01027696.1 | 351-425   | TCACCGAACAGGCACACCCGGAGCGATCCGGGGTCGCAAAGCCGAGGGTCTCTCAGAGACAGCCTGGCTATCGAA              |
| Freshwater sediment<br>metagenome<br>lwMethylamine_BCHP4119<br>8_g1 | ABSR01034994.1 | 779-862   | AGTTGTTAAAAGCAAACCTATCGAAAGGTAAGCACGCAAATTACCGGTCTACAGGCTTACGCCATGACAGCGGGATTGCCGGC      |
| Freshwater sediment<br>metagenome<br>lwMethylamine_C1984            | ABSR01001984.1 | 4860-4773 | ATTTGAAAAAGGCAAACCTCTGCTGAAAAGCGAGGGCGCAAATCACCGGTCTAAGGGGCGTCAGTTCTAAGATAGCGGGAGTACCAGA |
| Freshwater sediment<br>metagenome<br>lwMethylamine_C340             | ABSR01000340.1 | 798-885   | ATTTGAAAAAGGCAAACCTCTGCTGAAAAGCGAGGGCGCAAATCACCGGTCTAAGGGGCGTAAGTTCTAAGATAGCGGGAGTACCAGA |
| Freshwater sediment<br>metagenome<br>lwMethylamine_C3444            | ABSR01003444.1 | 717-630   | ATTTGAAAAAGGCAAACCTCAGCTGAAAAGCGAGGGCGCAAATCACCGGTCTAAGGGGCGTAAGTTCTAAGATAGCGGGAGTACCAGA |
| Freshwater sediment<br>metagenome<br>lwMethylamine_C4760            | ABSR01004760.1 | 1664-1751 | ATTTGAAAAAGGCAAACCTCTGCTGAAAAGCGAGGGCGCAAATCACCGGTCTAAGGGGCGCAAGTTCTAAGATAGCGGGAGTACCAGA |
| Freshwater sediment<br>metagenome                                   | ABSR01000491.1 | 1307-1220 | ATTTGAAAAAGGCAAACCTCTGCTGAAAAGCGAGGGCGCAAATCACCGGTCTAAGGGGCGTAAGTTCTAAGATAGCGGGAGTACCAGA |

|                                                          |                |               |                                                                                           |
|----------------------------------------------------------|----------------|---------------|-------------------------------------------------------------------------------------------|
| lwMethylamine_C491                                       |                |               |                                                                                           |
| Freshwater sediment<br>metagenome<br>lwMethylamine_C5141 | ABSR01005141.1 | 613-700       | ATTTGAAAAAGGCAAACCTCAGCTGAAAAGCGAGGGCGCAAAATCACCGGTCTAAGGGGCGTAAGTTCTAAGATAGCGGGAGTACCAGA |
| Freshwater sediment<br>metagenome<br>lwMethylamine_C5455 | ABSR01005455.1 | 1071-1154     | AGTTGTTAAAAGCAAACCTTATCGAAAGGTAAGCACGCAAAATTACCGGTCTACAGGCTTATGCCATGACAGCGGGATTGCCGGC     |
|                                                          |                |               |                                                                                           |
| Fusobacterium ulcerans<br>ATCC 49185 cont1.5             | ACDH01000005.1 | 9304-9229     | ATTATAATTTAGCAAAATAACAGAAATGCTATGACGCAAAGCTATAGGGCCTGTAAGATGGCAGCCAGTTGCAATT              |
| Fusobacterium ulcerans<br>ATCC 49185 cont1.5             | ACDH01000005.1 | 11055-10980   | TTATATCCTTGGCAAAATAACAGAAATGTTATGACGCAAAGCTATAGGGCCTGTAAATGGCAGCCAGTTGCAATT               |
| Fusobacterium ulcerans<br>ATCC 49185 cont1.5             | ACDH01000005.1 | 20810-20735   | CATTTTTTATGGCAAAGTAATGGAAACATTACGACGCAAAGCTATAGGGCCTGTAAAGTGGCAGCCAGTTGCAATT              |
| Fusobacterium varium<br>ATCC 27725 cont2.1               | ACIE02000001.1 | 78742-78667   | GTTAAATTCGGCAAAGTAATGGAAACATTATGACGCAAAGCTATAGGGCCTGTAAATGGTAGCCAGTTGCAATT                |
| Fusobacterium varium<br>ATCC 27725 cont2.1               | ACIE02000001.1 | 80448-80373   | TTAATTTCTTGGCAAAGTAATGGAAACATTATGACGCAAAGCTATAGGGCCTTTTAAATGGCAGCCAGTTGCAATT              |
| Fusobacterium varium<br>ATCC 27725 cont2.1               | ACIE02000001.1 | 90203-90128   | GATATTTTACGGCAAAGTAATGGAAACATTATGACGCAAAGCTATAGGGCCTGTAAATGGTAGCCAGTTGCAATT               |
|                                                          |                |               |                                                                                           |
| Gamma proteobacterium<br>NOR51-B<br>ctg_1109846220915    | ACCY01000019.1 | 226517-226430 | GCTGCTTAAAGGCAACCCCGCTGAAAGGCGGGCAACGCAAAGTCACGGGTCTAACGGGCGCATGCCCTATGACAGCCGGACTGCCGAT  |
| Gamma proteobacterium                                    | ACCY01000023.1 | 22592-22505   | GCTGCTTAAAGGCAACCCCGCTGAAAGGCGGGCAACGCAAAGTCACGGGTCTAACGGGCGCATGCCCTATGACAGCCGGACTGCCGAT  |

|                                                            |                |                 |                                                                                                 |
|------------------------------------------------------------|----------------|-----------------|-------------------------------------------------------------------------------------------------|
| NOR51-B<br>ctg_1109846220919                               |                |                 |                                                                                                 |
| Gamma proteobacterium<br>NOR51-B<br>ctg_1109846220919      | ACCY01000023.1 | 38522-38439     | TAGCAAAAAGGGCATGACCATCGAAAGGTGGTGGCGCAAAGTTACCGGCCTAAGGGCAAACCTACGGCAGCGGGATTACCGGA             |
| Gamma proteobacterium<br>NOR51-B<br>ctg_1109846220919      | ACCY01000023.1 | 33529-33444     | CATGCACAAGGGCAAACCATCGAAAGGTGGGGACGCAAAGTTTCCGGCCTACCGAGCAAGCCTCCAAGGTCGCGGGATTGCAACG           |
|                                                            |                |                 |                                                                                                 |
| Gemmata obscuriglobus<br>UQM 2246<br>gcontig_1106221708081 | ABGO01000202.1 | 369-275         | TCCTCGAAAGGGCTAACCCGCTGCGAAGCGGGGGCGCAAAGCCACGGGCCTGCGGTCTCCCCACCACACCGACCGCAGGTGCGCTGGTTGCCGAA |
|                                                            |                |                 |                                                                                                 |
| Geobacillus sp. C56-T3                                     | CP002050.1     | 3363364-3363282 | TCATGATAAAGGTACAGCTAAGGAACTTAGCGTCACAAAGCTACAGGGGCTAAGGGGAAACCTATGCCAGCCAGCTGCCATT              |
| Geobacillus sp. C56-T3                                     | CP002050.1     | 3278494-3278579 | ACGGCGAAAAGGCAAAGCGCTGGAACAGCGTGGCGCAAAGCTAAAGGGGCTACGGCGAAAGACGCTATGCCAGCCAGCTGCCGAA           |
| Geobacillus sp. Y412MC52                                   | CP002442.1     | 3342925-3342843 | CATGATGAAAGGTACAGCTAAGGAACTTAGCGTCACAAAGCTACAGGGGCTAAGGGGAAACCTATGCCAGCCAGCTGCCATT              |
| Geobacillus sp. Y412MC52                                   | CP002442.1     | 3240798-3240883 | ACGGCGAAAAGGCAAAGCGCTGGAACAGCGTGGCGCAAAGCTAAAGGGGCTACGGCGAAAGACGCTATGCCAGCCAGCTGCCGAA           |
| Geobacillus sp. Y412MC61                                   | CP001794.1     | 3336956-3336874 | CATGATGAAAGGTACAGCTAAGGAACTTAGCGTCACAAAGCTACAGGGGCTAAGGGGAAACCTATGCCAGCCAGCTGCCATT              |
| Geobacillus sp. Y412MC61                                   | CP001794.1     | 3234829-3234914 | ACGGCGAAAAGGCAAAGCGCTGGAACAGCGTGGCGCAAAGCTAAAGGGGCTACGGCGAAAGACGCTATGCCAGCCAGCTGCCGAA           |
| Geobacillus<br>thermoglucosidasius<br>C56-YS93             | CP002835.1     | 3310199-3310288 | AATATAATCAGCAAACCTACTCGAAAGGGTAGGACGCAAACTAAAGGGGCTAAATCTATTCTCAATAGACATGCCAGCCAGTTGCCCTT       |
|                                                            |                |                 |                                                                                                 |
| Geobacter bemidjensis Bem                                  | CP001124.1     | 2736237-2736160 | CACACGAAAAGGCAAACCCAGGGTAACCTGGGGACGCAAAGCCACCTGTCCAGCATTTGGAAAGAGGGGTTGTCGAA                   |
| Geobacter bemidjensis Bem                                  | CP001124.1     | 3197829-3197905 | AGACGACAATACTAAACCATCCGCGAGGATGGGACGGAAAGCCTACAGGGTCTCCAAGAGACAGCCGGGTCGCCGAA                   |



|                                    |            |                 |                                                                                |
|------------------------------------|------------|-----------------|--------------------------------------------------------------------------------|
| Geobacter bemidjensis Bem          | CP001124.1 | 649730-649654   | ACACGATAATACTCAACCATCCGCGAGGATGGGGCGGAAAGCCTATAGGGTCTCCCTGAGACAGCCGGGTTGCCGAA  |
| Geobacter bemidjensis Bem          | CP001124.1 | 2079950-2080025 | CAACGACAATACTAAACCATCCGTGAGGATGGGACGGAAAGCCCACGGGTCTCCCTGAGACAGCCGGGTCGCCGAA   |
| Geobacter bemidjensis Bem          | CP001124.1 | 2499141-2499065 | ACACGATAATACTCAACCACTCGCGAGGGTGGGGCGGAAAGCCTACAGGGTCTCCTTGAGACAGCCGGGTTGCCGAA  |
| Geobacter bemidjensis Bem          | CP001124.1 | 382539-382615   | ATACGACAATACTAAACCTTCCGCGAGGATGGGACGGAAAGCCTATAGGGTCTCACTGAGACAGCCGGGTCGCCGAA  |
| Geobacter bemidjensis Bem          | CP001124.1 | 1256047-1255971 | ACACGACAATACTAAACCTTTTCGCGAGAAAGTGACGGAAAGCCTATTGGGTCTCACGAAGACAGCCGGGTCGCCGAA |
| Geobacter bemidjensis Bem          | CP001124.1 | 4525108-4525184 | AGACGATAATACTCAACCATCCGCGAGGATGGGGCGGAAAGCCTATAGGGTCTCACCGAGACAGCCGGGTTGCCGAA  |
| Geobacter bemidjensis Bem          | CP001124.1 | 2076757-2076832 | CAACGACAATACTAAACCACCTGCGAAGGTGGGACGGAAAGCCCACGGGTCTCCCTGAGACAGCCGGGTCGCCGAT   |
| Geobacter bemidjensis Bem          | CP001124.1 | 1375451-1375527 | AAACGATAATACTAAACCATCCGCGAGGATGGGGCGGAAAGCCTACAGGGTCTCACAGAGACAGCCGGGTTGCCGAA  |
| Geobacter bemidjensis Bem          | CP001124.1 | 2179000-2178925 | GACGACAAATGCTAAACCATCCGCGAGGATGGGGCGGAAAGCCCAAGGGTCTCACCGAGACAGCCGGGTTGCCGAA   |
| Geobacter bemidjensis Bem          | CP001124.1 | 2179188-2179112 | AGACGACAATACTAAACCATCCGCGAGGGTGGGACGGAAAGCCTACAGGGTCTCCACGAGACAGCCGGGTCGCCGAA  |
| Geobacter bemidjensis Bem          | CP001124.1 | 4525294-4525370 | ACACGATAATACTCAACCATCCGCGAGGATGGGGCGGAAAGCCTATTGGGTCTCTCTGAGACAGCCGGGTTGCCGAA  |
| Geobacter bemidjensis Bem          | CP001124.1 | 3434379-3434303 | TAACGACAATACTAAACCATCCGCGAGGGTGGGACGGAAAGCCTACTGGGTCTCATAGAGACAGCCGGGTCGCCGAA  |
| Geobacter lovleyi SZ               | CP001089.1 | 2534834-2534760 | TCACCGAAAAGGCAAAATCCAGGGGACTGGATGACGCAAAGCCACCTACCCGGACCGGGAAGAGGGGTACCGAA     |
| Geobacter lovleyi SZ               | CP001089.1 | 2146051-2145975 | ACACGATAATACTAAACCATTCGCGAGGATGGGACGGAAAGCCTACAGGATCTCTCTGAGACAGCCGGGTCGCCGAA  |
| Geobacter lovleyi SZ               | CP001089.1 | 1534181-1534105 | TATCGATACTACTAAACTATCCGTGAGGATAGGACGGAAAGCCTACAGGGTCTCACCGAGACAGCCAGGTGCGCGAA  |
| Geobacter lovleyi SZ               | CP001089.1 | 645064-645139   | ATACGAAAATACTCAACTACCCGCGAGGGTAGGGCGGAAACCCACGGGTCTCTCTGAGACAGCCGGGCTACCGAA    |
| Geobacter lovleyi SZ               | CP001089.1 | 213210-213134   | CCCTTTAAAGAGCAAAATCAGGGTGACCTGATGGCGCAAAATCACGGGTCCCATGAAAGGATAGCCGGATTACTGAT  |
| Geobacter metallireducens<br>GS-15 | CP000148.1 | 2280692-2280768 | AGACGACAATACTCAACCATCCGTGAGGATGGGGCGGAAAGCCTATTGGGTCTCACCGAGACAGCCGGGTTGCCGAA  |
| Geobacter metallireducens<br>GS-15 | CP000148.1 | 2447619-2447695 | ACACGACAATACTCAACCATCCGCGAGGATGGGGCGGAAAGCCTACAGGGTCTCCAGCAGACAGCCGGGTTGCCGAA  |
| Geobacter metallireducens<br>GS-15 | CP000148.1 | 265065-264989   | AGACGACAATACTAAACCATCCGCGAGGATGGGGCGGAAAGCCATAGGGTCTCACCGAGACAGCCGGGTTGCCGAA   |
| Geobacter metallireducens<br>GS-15 | CP000148.1 | 158170-158246   | AGACGATAATACTAAACCATCCGCGAGGGTGGGACGGAAAGCCTACAGGGTCTCCCCGAGACAGCCGGGTCGCCAAA  |

|                                    |            |                 |                                                                                                                                                                                                                   |
|------------------------------------|------------|-----------------|-------------------------------------------------------------------------------------------------------------------------------------------------------------------------------------------------------------------|
| Geobacter metallireducens<br>GS-15 | CP000148.1 | 1324478-1324402 | AGTCGATAATACTAAACCATTTCGTGAGAATGGGGCGGAAAGCCTACAGGGTCTTACTGAGACAGCCGGGTTGCCGAA                                                                                                                                    |
| Geobacter metallireducens<br>GS-15 | CP000148.1 | 325755-325831   | AGACGATAATACTCAACCATCCGCGAGGATGGGGCGGAAAGCCTACAGGGTCTCTTCGAGACAGCCGGGTTGCCGAA                                                                                                                                     |
| Geobacter metallireducens<br>GS-15 | CP000148.1 | 3913272-3913348 | AGACGATAATACTAAACCATTTCGCGAGAATGGGGCGGAAAGCCTATAGGGTCTCCCTGAGACAGCCGGGTTGCCGAA                                                                                                                                    |
| Geobacter metallireducens<br>GS-15 | CP000148.1 | 3913064-3913140 | AGACGACAATACTTAACCATTTCGCGAGAATGGGGCGGAAAGCCTATAGGGTCTCATGGAGACAGCCGGGTTGCCGAA                                                                                                                                    |
| Geobacter metallireducens<br>GS-15 | CP000148.1 | 1911272-1911348 | AGACGACAATACTAAACCATCCGCGAGGATGGGGCGGAAAACCCACAGGGTCTCCCTGAGACAGCCGGGTTGCCGAA                                                                                                                                     |
| Geobacter metallireducens<br>GS-15 | CP000148.1 | 1212049-1211973 | TAGCGATACTACTAAACCATCCGCGAGGATGGGGCGGAAAGCCTACAGGGTCTCATCGAGACAGCCGGGTTGCCGAA                                                                                                                                     |
| Geobacter metallireducens<br>GS-15 | CP000148.1 | 827292-827209   | TTTCCGAGAGGGCAAACCTTCGGGTAACCGGAGGACGCAAAGCCACGGGTCCTGACTCCATGGTCAGGATAGCCGGGTTGTCGAA                                                                                                                             |
| Geobacter metallireducens<br>GS-15 | CP000148.1 | 1079465-1079541 | TATCGACAATACTAAACCATCCGCGAGGGTGGGACGGAAAGCCTACAGGGTCTCTCTGAGACAGCCGGGATGCCGAA                                                                                                                                     |
| Geobacter metallireducens<br>GS-15 | CP000148.1 | 1977793-1977869 | AGACGATAATACTCAACCATTTCGCGAGAATGGGGCGGAAAGCCTATAGGGTCTCATGCAGACAGCCGGGTTGCCGAA                                                                                                                                    |
| Geobacter metallireducens<br>GS-15 | CP000148.1 | 1623888-1623688 | ACCAGTAAAGGCCAAAACACGGGTAACCGTGTGACGAAAGCCTACGGGTCCACGAGACGGATTTCGATTTTGTACGGAGACCAAGGCGGCGAGGAGG<br>AGGCGACGGAGGCGTACCTGAAGGTACGTTGAGGAGCCCCGCACGAGCCAACGCCGGTATACGTCAGAAGGCGAATCCGGCCGATGGATGGCCGGGT<br>TGCCTGG |
| Geobacter metallireducens<br>GS-15 | CP000148.1 | 824437-824354   | TTTCCGAAAGGGCAAACCTTCGGGTAACCGGGGGACGCAAAGCCACGGGTCCTGACTCCATGGTCAGGATAGCCGGGTTGTCGAA                                                                                                                             |
| Geobacter metallireducens<br>GS-15 | CP000148.1 | 271494-271418   | ACACGACAATACTAAACCATCCGCGAGGATGGGGCGGAAAGCCCACAGGGTCTCACCGAGACAGCCGGGTTGCCGAA                                                                                                                                     |

|                                    |            |                 |                                                                                           |
|------------------------------------|------------|-----------------|-------------------------------------------------------------------------------------------|
| Geobacter metallireducens<br>GS-15 | CP000148.1 | 1334239-1334315 | AGACGACAATACTAAACCATCCGCGAGGGTGGGACGGAAAGCCTACAGGGTCTCCCCGAGACAGCCGGGTGCGCGAA             |
| Geobacter metallireducens<br>GS-15 | CP000148.1 | 1212229-1212153 | TAGCGATACTACTAAACCATCCGCGAGGATGGGGCGGAAAGCCTACAGGGTCTCATCGAGACAGCCGGGTGCGCGAA             |
| Geobacter metallireducens<br>GS-15 | CP000148.1 | 1324617-1324541 | AGACGACAATACTAAACCATTGCGGAGAATGGGGCGGAAAGCCTACAGGGTCTTATTGAGACAGCCGGGTGCGCGAA             |
| Geobacter sp. FRC-32               | CP001390.1 | 1962097-1962021 | AGACGATAATACTCAACCATCCGCGAGGATGGGGCGGAAAGCCTAAAGGGTCTCTCTGAGACAGCCGGGTGCGCGAA             |
| Geobacter sp. FRC-32               | CP001390.1 | 1198050-1198127 | TTGACGAAAAGGCAAAGCACGGGTAATCGTGTGACGAAAGCTACCTGTCCAGAAGCCTGAAAGAGGGGCCCGCGAA              |
| Geobacter sp. FRC-32               | CP001390.1 | 3538288-3538364 | AGACGACAATACTAAACCATTGCAAGGGTGGGACGGAAAGCCTACAGGGTCTTACTGAGACAGCCGGGACGCGCGAA             |
| Geobacter sp. FRC-32               | CP001390.1 | 3356677-3356601 | TAACGATAATACTAAACCATTGCGGAGAATGGGGCGGAAAGCCTATAGGGTCTCAAGCAGACAGCCGGGTGCGCGAA             |
| Geobacter sp. FRC-32               | CP001390.1 | 158336-158260   | AGACGATAATACTCAACCATTGCAAGAATGGGGCGGAAAGCCTATAGGGTCTTACTGAGACAGCCGGGTGCGCGAA              |
| Geobacter sp. FRC-32               | CP001390.1 | 2319947-2320023 | AGACGATAATACTAAACCATCCGCGAGGGTGGGACGGAAAGCCCATTGGGTCTCATCGAGATAGCCGGGTGCGCGAA             |
| Geobacter sp. FRC-32               | CP001390.1 | 1868595-1868511 | TTTCCGAAAGGGTAATCTGGAAGAAATTCCAGTGACACAAAGCATACGGATCTGTTATTAATAACAGATAGCCGGGTGCGCGAA      |
| Geobacter sp. FRC-32               | CP001390.1 | 3607979-3607903 | AGACGATAATACTAAACCACCTGCGAAGGTGGGGCGGAAAGCCTAATGGGTCTCAAGGAGACAGCCGGGTGCGCGAA             |
| Geobacter sp. FRC-32               | CP001390.1 | 3014666-3014591 | AGACGACAATACTAAACCATTGCGGAGAATGGGGCGGAAACCCATGGGTCTCCTGTAGACAGCCGGGTGCGCGAA               |
| Geobacter sp. M18                  | CP002479.1 | 4751536-4751459 | TCTCCGAACGGGCAAAGCCAGAGTGATCTGGTGACGCAAAGCCACGGGTCCTGACACAAGGATAGCCGGGTGCGCGAA            |
| Geobacter sp. M18                  | CP002479.1 | 2018597-2018673 | ACACGACAATACTAAACCATTGCGGAGGGTGGGACGGAAAGCCTACAGGGTCTCTCTGAGACAGCCGGGTGCGCGAA             |
| Geobacter sp. M18                  | CP002479.1 | 4032452-4032528 | ACACGATAATACTAAACCATCCGCGAGGATGGGGCGGAAAGCCCATTGGGTCTCAAGGAGACAGCCGGGTGCGCGAA             |
| Geobacter sp. M18                  | CP002479.1 | 5044342-5044266 | TAACGATACTACTAAACCATCCGCGAGGATGGGGCGGAAAGCCCATCGGGTCTCACGACAGACAGCCGGGTGCGCGAA            |
| Geobacter sp. M18                  | CP002479.1 | 1280784-1280873 | TTTCCGAAACGGTAAACTTGGAAGAAATTCCAAGGGCACAAAGCTGACGGACCCGTTACCTAAAAATAACAGGTAGCCGAGCTACCGAA |
| Geobacter sp. M18                  | CP002479.1 | 1214376-1214301 | AAACGATAATACTAAACCATCCGCGAGGGTGGGACGGAAAGCCTAAGGGTCTCAACGAGACAGCCGGGTGCGCGAA              |
| Geobacter sp. M18                  | CP002479.1 | 315514-315436   | GTGAGATAAGGGCAAACCGGAGCAATCCGGCGACTCAAAGCCACGGGTCCCCTGCAGCGGGGACAGCCGGGTACCGAA            |
| Geobacter sp. M18                  | CP002479.1 | 3835282-3835206 | AAACGATAATACTAAACCATCCGCGAGGATGGGGCGGAAAGCCTATTGGGTCTCCCTGAGACAGCCGGGTGCGCGAA             |
| Geobacter sp. M18                  | CP002479.1 | 1214179-1214103 | ACACGATAATACTAAACCATTGCGGAGGGTGGGACGGAAAGCCTACAGGGTCTCAACGAGACAGCCGGGTGCGCGAA             |
| Geobacter sp. M18                  | CP002479.1 | 5044142-5044066 | AGACGATAATACTAAACCGCCGCGAGGGTGGGGCGGAAAGCCATAGGGTCTCACTGAGACAGCCGGGTGCGCGAA               |

|                   |            |                 |                                                                                   |
|-------------------|------------|-----------------|-----------------------------------------------------------------------------------|
| Geobacter sp. M18 | CP002479.1 | 1337425-1337504 | ACACCGAAAAGGCAAACCTGGGGTGACCCGGGACGCAAAGCCACCTATCCAGGAAAGCCTGGAAAGAGGGGCTATCGAA   |
| Geobacter sp. M18 | CP002479.1 | 4751318-4751240 | TCTCCGAACGGGCAAAGCCAGAGTAATCTGGTGACGCAAAGCCACGGGTCCTGACACAAGGGACAGCCGGGTTGCCGAA   |
| Geobacter sp. M18 | CP002479.1 | 3146404-3146480 | AGACGATAATACTAAACCATCCGCGAGGATGGGACGGAAAGCCTACAGGGTCTCAACGAGACAGCCGGGTCGCCGAA     |
| Geobacter sp. M18 | CP002479.1 | 1576719-1576643 | AAACGACAATACTAAACCATCCGCGAGGATGGGACGGAAAACCTACAGGGTCTCACAGAGACAGCCGGGTCGCCGAA     |
| Geobacter sp. M18 | CP002479.1 | 4751085-4751008 | TCTCCGAACGGGCAAAGCCAGAGTAATCTGGTGACGCAAAGCCACGGGTCCTGAGACAAGGATAGCCGGGTTGCCGAA    |
| Geobacter sp. M18 | CP002479.1 | 2017161-2017237 | AGACGATAATACTAAACCATCCGCGAGGGTGGGACGGAAAGCCTACAGGGTCTCACTGAGACAGCCGGGTCGCCGAA     |
| Geobacter sp. M18 | CP002479.1 | 4501775-4501699 | TAACGATAATACTAAACCATCCGCGAGGGTGGGACGGAAAGCCTACTGGGTCTCATAGAGACAGCCGGGTCGCCGAA     |
| Geobacter sp. M21 | CP001661.1 | 1725760-1725684 | AGACGACAATACTAAACCATCCGCGAGGATGGGACGGAAAGCCTACAGGGTCTCCAAGAGACAGCCGGGTCGCCGAA     |
| Geobacter sp. M21 | CP001661.1 | 675289-675213   | AGACGATAATACTCAACCATCCGCGAGGATGGGGCGGAAAGCCTATAGGGTCTCCCTGAGACAGCCGGGTTGCCGAA     |
| Geobacter sp. M21 | CP001661.1 | 3585644-3585568 | AGACGATAATACTAAACCATCCGCGAGGATGGGGCGGAAAGCCTACAGGGTCTCCAGAGACAGCCGGGTTGCCGAA      |
| Geobacter sp. M21 | CP001661.1 | 513439-513518   | TCTCCGAACGGGCAAACCCAGAGTAATCTGGTGACGCAAAGCCACGGGTCCTGAACCTTACAGGATAGCCGGGTTGCCGAA |
| Geobacter sp. M21 | CP001661.1 | 2163539-2163616 | CACACGAAAAGGCAAACCCAGGGTAACCTGGGGACGCAAAGCCACCTGTCCAGCATTCTGGAAAGAGGGGTTGTCGAA    |
| Geobacter sp. M21 | CP001661.1 | 2404320-2404396 | ACACGATAATACTCAACCACTCGCGAGGGTGGGGCGGAAAGCCTACAGGGTCTCCTTGAGACAGCCGGGTTGCCGAA     |
| Geobacter sp. M21 | CP001661.1 | 3691135-3691211 | TAACGACAATACTAAAACCTTTCGCGAGGAAGTGACGAAAGCCTATTGGGTCTCACGCAGACAGCCGGGTCGCCGAA     |
| Geobacter sp. M21 | CP001661.1 | 1448421-1448497 | ACACGACAATACTAAACCACTCCGCAAGGGTGGGACGGAAAGCCTAAGGGTCTCACCGAGACAGTCGGGTCGCCGAA     |
| Geobacter sp. M21 | CP001661.1 | 359887-359963   | ATACGACAATACTAAACCTTCCGCGAGGATGGGACGGAAAGCCTATAGGGTCTCACTGAGACAGCCGGGTCGCCGAA     |
| Geobacter sp. M21 | CP001661.1 | 2863132-2863057 | CCGCGACAATACTAAACCATCTGCGAAGATGGGACGGAAAGCCCAAGGGTCTCTCTGAGACAGCCGGGTCGCCGAT      |
| Geobacter sp. M21 | CP001661.1 | 2709731-2709807 | AGACGAAAATACTAAACCATCCGCGAGGGTGGGACGGAAAGCCTAAAGGGTCTCCACGAGACAGCCGGGTCGCCGAA     |
| Geobacter sp. M21 | CP001661.1 | 2709923-2709998 | GACGACAAATGCTAAACCATCCGCGAGGATGGGGCGGAAAGCCCAAGGGTCTCACCGAGACAGCCGGGTTGCCGAA      |
| Geobacter sp. M21 | CP001661.1 | 512997-513076   | TCTCCGAACGGGCAAACCCAGAGTAATCTGGTGACGCAAAGCCACGGGTCCTGATGTTACAGGATAGCCGGGTTGCCGAA  |
| Geobacter sp. M21 | CP001661.1 | 513975-514054   | TCTCCGAACGGGCAAAGCCAGAGTGATCTGGTGACGCAAAGCCACGGGTCCTGGACTGACAGGATAGCCGGGTTGCCGAA  |
| Geobacter sp. M21 | CP001661.1 | 4660637-4660713 | AGACGATAATACTCAACCATCCGCGAGGGTGGGGCGGAAAGCCTATAGGGTCTCACCGAGACAGCCGGGTTGCCGAA     |
| Geobacter sp. M21 | CP001661.1 | 4660821-4660897 | AGACGATAATACTCAACCATTCGCGAGGATGGGGCGGAAAGCCTATTGGGTCTCTCTGAGATAGCCGGGTTGCCGAA     |
| Geobacter sp. M21 | CP001661.1 | 378592-378668   | ACACGACAATACTAAACCATCCGTGAGGGTGGGACGGAAAGCCTATTGGGTCTCACCGAGACAGCCGGGTCGCCGAA     |
| Geobacter sp. M21 | CP001661.1 | 1448204-1448280 | ACACGACAATACTAAACCATCCGTGAGGGTGGGACGGAAAGCCATAGGGTCTCAACGAGACAGCCGGGTCGCCGAA      |

|                                   |            |                 |                                                                                               |
|-----------------------------------|------------|-----------------|-----------------------------------------------------------------------------------------------|
| Geobacter sp. M21                 | CP001661.1 | 2863574-2863498 | AGACGATAATACTAAACCATTCGCGAGAATGGGGCGGAAAGCCTATAGGGTCTCAACGAGACAGCCGGGTTGCCGAA                 |
| Geobacter sp. M21                 | CP001661.1 | 513222-513301   | TCTCCGAACAGGCAAAGCCAGAGTGATCTGGTGACGCAAAGCCACGGGTCCTGCACTTACAGGACAGCCGGGTTGCCGAA              |
| Geobacter sulfurreducens<br>KN400 | CP002031.1 | 166135-166059   | AAACGATAATACTAAACCATCCGCGAGGATGGGGCGGAAAGCCTACAGGGTCTCACCGAGACAGCCGGGTTGCCGAA                 |
| Geobacter sulfurreducens<br>KN400 | CP002031.1 | 1681079-1681003 | ACACGATACTACTAAACCATCCGCGAGGATGGGGCGGAAAGCCCACAGGGTCTCACCGAGACAGCCGGGATGCCGAA                 |
| Geobacter sulfurreducens<br>KN400 | CP002031.1 | 1889823-1889898 | ACACGACAATACTAAACCATCCGCGAGGATGGGGCGGAAAGCCTAAGGGTCTCCCTGAGACAGCCGGGTCGCCGAA                  |
| Geobacter sulfurreducens<br>KN400 | CP002031.1 | 1117928-1117852 | ACACGACAATACTAAACCATCCGCGAGGATGGGGCGGAAAGCCCACAGGGTCTCACCGAGACAGCCGGGTCGCCGAA                 |
| Geobacter sulfurreducens<br>KN400 | CP002031.1 | 2104756-2104666 | TTTCCGAAGGGGTAAACCCAGGGTAACCTGGGGACACAAAGCTACGGGTCCTGAAATGTCCTAGGGTTTTTCAGGATAGCCGGGTTGGCGAG  |
| Geobacter sulfurreducens<br>KN400 | CP002031.1 | 1070932-1070849 | TTTTCGAAGAGGTAAACCCGGGCAACCGGGGGGCACAAAGCTGCGGGTCCCGCCAGAAACAGCGGGACAGCCGGGTTGGCGAA           |
| Geobacter sulfurreducens<br>KN400 | CP002031.1 | 2195974-2195898 | TATCGATAATACTAAACCATCCGTGAGGATGGGGCGGAAAGCCTACAGGGTCTCACCGAGACAGCCGGGTTGCCGAA                 |
| Geobacter sulfurreducens<br>KN400 | CP002031.1 | 1319879-1319954 | AGACGATAAGACTAAACCACCCGCGAGGGTGGGGCGGAAAGCCCACGGGTCTCTCTGAGACAGCCGGGATGCCGAA                  |
| Geobacter sulfurreducens<br>KN400 | CP002031.1 | 2107501-2107410 | TTTCCGAAGAGGTAAACCCAGGGTAACCTGGTGACACAAAGCCACGGGTCCTGAAATCGTCCTAGGTATTTTCAGGATGGCCGGGTTGGCGAA |
| Geobacter sulfurreducens<br>KN400 | CP002031.1 | 2105023-2104947 | ACACGATAATACTCAACCATCCGCGAGGATGGGGCGGAAAGCCTACAGGGTCTCACCGAGACAGCCGGGTTGCCGAA                 |
| Geobacter sulfurreducens<br>KN400 | CP002031.1 | 1052331-1052407 | ACACGACAATACTAAACCATCCGCGAGGGTGGGACGGAAAGCCCACAGGGTCTCTCTGAGACAGCCGGGATGCCGAA                 |
| Geobacter sulfurreducens          | CP002031.1 | 166334-166258   | AGACGACAATACTCAACCATTCGCGAGAATGGGGCGGAAAGCCTACAGGGTCTCACCGAGACAGCCGGGTTGCCGAA                 |

|                    |                              |                 |  |                                                                                            |
|--------------------|------------------------------|-----------------|--|--------------------------------------------------------------------------------------------|
| KN400              |                              |                 |  |                                                                                            |
| Geobacter<br>KN400 | sulfurreducens<br>CP002031.1 | 3063293-3063219 |  | ACACGATAAGACTAAACCGTCCGCGAGGGCGGGGCGGAAAGCCTAGGGTCTCCTAGAGACAGCCGGGATGCCGAA                |
| Geobacter<br>KN400 | sulfurreducens<br>CP002031.1 | 2107711-2107635 |  | AGACGATAATACTAAACCATTTCGCGAGAATGGGGCGGAAAGCCTATAGGGTCTCCACGAGACAGCCGGGTGCCGAA              |
| Geobacter<br>KN400 | sulfurreducens<br>CP002031.1 | 3063478-3063404 |  | AGCCGATAAGACTAAACCATCCGCGAGGGTGGGGCGGAAAGCCCAGGGTCTCAAGGAGATGGCCGGGATGCCGAA                |
| Geobacter<br>KN400 | sulfurreducens<br>CP002031.1 | 2659769-2659689 |  | CTCCGAAAAGAGTAAACCCATCGCAAGGTGGGGACACAAAGCCGACGGGTGCCGCTGGAGCGGGACGGCCGGGTGCCGGA           |
| Geobacter<br>PCA   | sulfurreducens<br>AE017180.1 | 1348999-1349074 |  | AGACGATAAGACTAAACCACCCGCGAGGGTGGGGCGGAAAGCCCACGGGTCTCTCTGAGACAGCCGGGATGCCGAA               |
| Geobacter<br>PCA   | sulfurreducens<br>AE017180.1 | 2133695-2133619 |  | ACACGATAATACTCAACCATCCGCGAGGATGGGGCGGAAAGCCTACAGGGTCTCACAGAGACAGCCGGGTGCCGAA               |
| Geobacter<br>PCA   | sulfurreducens<br>AE017180.1 | 1922655-1922730 |  | ACACGACAATACTAAACCATCCGCGAGGATGGGGCGGAAAGCCTAAGGGTCTCCCTGAGACAGCCGGGTGCCGAA                |
| Geobacter<br>PCA   | sulfurreducens<br>AE017180.1 | 2760060-2759980 |  | CTCCGAAAAGAGTAAACCCATCGCAAGGTGGGGACACAAAGCCGACGGGTGCCGCTGGAGCGGGACGGCCGGGTGCCGGA           |
| Geobacter<br>PCA   | sulfurreducens<br>AE017180.1 | 3169147-3169073 |  | AGCCGATAAGACTAAACCATCCGCGAGGGTGGGGCGGAAAGCCCAGGGTCTCAAGGAGATGGCCGGGATGCCGAA                |
| Geobacter<br>PCA   | sulfurreducens<br>AE017180.1 | 2133429-2133339 |  | TTTCCGAAGGGGTAAACCCAGGGTAACCTGGGGACACAAAGCTACGGGTCTGAAATGTCCTAGGGTTTTTCAGGATAGCCGGGTGGCGAG |
| Geobacter<br>PCA   | sulfurreducens<br>AE017180.1 | 2773389-2773465 |  | TAGCGATACTACTAAACCATCCGCGAGGATGGGGCGGAAAGCCCACAGGGTCTCACGAAGACAGCCGGGTGCCGAA               |
| Geobacter<br>PCA   | sulfurreducens<br>AE017180.1 | 2225994-2225918 |  | TATCGATAATACTAAACCATCCGTGAGGATGGGGCGGAAAGCCTACAGGGTCTCACCGAGACAGCCGGGTGCCGAA               |

|                  |                              |                 |                                                                                             |
|------------------|------------------------------|-----------------|---------------------------------------------------------------------------------------------|
| Geobacter<br>PCA | sulfurreducens<br>AE017180.1 | 2136377-2136301 | AGACGATAATACTAAACCATTTCGCGAGAATGGGGCGGAAAGCCTATAGGGTCTCCACGAGACAGCCGGGTGCCGAA               |
| Geobacter<br>PCA | sulfurreducens<br>AE017180.1 | 1081543-1081619 | ACACGACAATACTAAACCATCCGCGAGGGTGGGACGGAAAGCCCACAGGGTCTCTCTGAGACAGCCGGGATGCCGAA               |
| Geobacter<br>PCA | sulfurreducens<br>AE017180.1 | 198072-197996   | AGACGACAATACTCAACCATTTCGCGAGAATGGGGCGGAAAGCCTACAGGGTCTCACCGAGACAGCCGGGTGCCGAA               |
| Geobacter<br>PCA | sulfurreducens<br>AE017180.1 | 3168962-3168888 | ACACGATAAGACTAAACCGTCCGCGAGGGCGGGGCGGAAAGCCTAGGGTCTCCTAGAGACAGCCGGGATGCCGAA                 |
| Geobacter<br>PCA | sulfurreducens<br>AE017180.1 | 1147037-1146961 | ACACGACAATACTAAACCATCCGCGAGGATGGGACGGAAAGCCCACAGGGTCTCACCGAGACAGCCGGGTGCCGAA                |
| Geobacter<br>PCA | sulfurreducens<br>AE017180.1 | 1100143-1100060 | TTTTCGAAGAGGTAAACCCCGGGTAACCGGGGGGCACAAAGCTGCGGGTCCCGCTGAAACAGCGGGACAGCCGGGTGGCGAA          |
| Geobacter<br>PCA | sulfurreducens<br>AE017180.1 | 197873-197797   | AAACGATAATACTAAACCATCCGCGAGGATGGGGCGGAAAGCCTACAGGGTCTCACCGAGACAGCCGGGTGCCGAA                |
| Geobacter<br>PCA | sulfurreducens<br>AE017180.1 | 2136167-2136076 | TTTCCGAAGAGGTAAACCAGGGTAACCTGGTGACACAAAGCCACGGGTCCTGAAATCGTCCTAGGTATTTTCAGGATGGCCGGGTGGCGAA |
| Geobacter<br>PCA | sulfurreducens<br>AE017180.1 | 1711433-1711357 | ACACGATACTACTAAACCATCCGCGAGGATGGGGCGGAAAGCCCACAGGGTCTCACCGAGACAGCCGGGATGCCGAA               |
| Geobacter<br>Rf4 | uraniireducens<br>CP000698.1 | 2694571-2694495 | AGACGATAATACTAAACCATTTCGCGAGAATGGGACGGAAAGCCTAAAGGGTCTCACCGAGACAGCCAGGTCGCCGAA              |
| Geobacter<br>Rf4 | uraniireducens<br>CP000698.1 | 247508-247587   | CCGACGAAAAGGCAAAGCACGGGCAACCGTGTGACGCAAAGCTACCTGTCCAGTTGCAACTGGATAGAGGGGCTGCCGAA            |
| Geobacter<br>Rf4 | uraniireducens<br>CP000698.1 | 458192-458116   | ACGCGATACTACTAAACCACCCGCGAGGGTGGGGCGGAAAGCCCACAGGGTCTTTAAAAGACAGCCGGGTGCCGAA                |
| Geobacter        | uraniireducens<br>CP000698.1 | 2980387-2980463 | TCTAGATAAAGCCAAAACCCGGGTAAACCGGGTGACGGAAAGCCACGGGCCCTGCGAATGGGCAGCCGGGTGCCTGG               |

|                  |                              |                 |                                                                                  |
|------------------|------------------------------|-----------------|----------------------------------------------------------------------------------|
| Rf4              |                              |                 |                                                                                  |
| Geobacter<br>Rf4 | uraniireducens<br>CP000698.1 | 3544154-3544233 | TCCCGACAAAGCCAACCCCTTCGTGAGGGGGGGAACGGAAAGCCACGGGCCTCCGGAATGGAGACAGCCGAGCCGCCAAA |
| Geobacter<br>Rf4 | uraniireducens<br>CP000698.1 | 2785587-2785665 | TTCCGACAAAGCCAACCCCTTCGCGAGGAGGGGGCGGAAAGCGGCGGGTCTTCGCGACGAAGATGGCCGAGCTGCCGAG  |
| Geobacter<br>Rf4 | uraniireducens<br>CP000698.1 | 2843136-2843059 | TACCGAAAAAGCCAACCTTTCGTGAGAGGGGGGCGGAAAGCAACGGGTCTTCAGATGAAGATGGCCGGGCTGCCGAA    |
| Geobacter<br>Rf4 | uraniireducens<br>CP000698.1 | 838672-838748   | AGACGATAATACTAAACCATTTCGTGAGAATGGGGCGGAAAGCCTATAGGGTCTCGAAGAGACAGCCGGGTGCCGAA    |
| Geobacter<br>Rf4 | uraniireducens<br>CP000698.1 | 838444-838520   | AGACGATAATACTAAACCATTTCGCGAGAATGGGGCGGAAAGCCTAATGGGTCTCGAAGAGACAGCCGGGTGCCGAA    |
| Geobacter<br>Rf4 | uraniireducens<br>CP000698.1 | 2005281-2005205 | AAACGATAATACCAAACCATCCGCGAGGATGGGACGAAAGCCTACAGGGTCTCAAGAAGACAGCCGGGTGCCGAA      |
| Geobacter<br>Rf4 | uraniireducens<br>CP000698.1 | 2097368-2097444 | TAACGATAATACTAAACCATCCGCGAGGATGGGGCGGAAAGCCTATAGGGTCTCACGCAGACAGCCGGGTGCCGAA     |
| Geobacter<br>Rf4 | uraniireducens<br>CP000698.1 | 3601373-3601294 | TCTCCGAACGGGCAAAACCAGAGTAATCTGGTGACGAAAGCTACGGGTCTGACCTAAAAGGATAGCCGGGTGCCGAA    |
| Geobacter<br>Rf4 | uraniireducens<br>CP000698.1 | 323123-323198   | AGACGATACTACTAAACCATCCGCGAGGATGGGACGAAAGCCACAGGATCTCCAGAAGACAGCCGGGTGCCGAA       |
| Geobacter<br>Rf4 | uraniireducens<br>CP000698.1 | 2356611-2356687 | AGACGATAATACTTAACCATCCGCGAGGGTGGGGCGGAAAGCCTAAAGGGTCTCCATGAGATAGCCGGGTGCCGAA     |
| Geobacter<br>Rf4 | uraniireducens<br>CP000698.1 | 626595-626519   | AGACGATAATACTAAACCATCCGCGAGGATGGGACGAAAGCCTACAGGGTCTCATGAAGACAGCCGGGTGCCGAA      |
| Geobacter<br>Rf4 | uraniireducens<br>CP000698.1 | 2790589-2790512 | AGACGATAATACTAAACCATCCGTGAGGATGGGGCGGAAAGCCTAAAGGGTCTCAAGCCAGACAGCCGGGTGCCGAA    |



|                  |                              |                 |                                                                                                                                                                         |
|------------------|------------------------------|-----------------|-------------------------------------------------------------------------------------------------------------------------------------------------------------------------|
| Geobacter<br>Rf4 | uraniireducens<br>CP000698.1 | 626391-626315   | AAACGATAATACTAAACCATCCGTGAGGATGGGACGGAAAGCCTATAGGGTCTCATGAAGACAGCCGGGTGCGCGAA                                                                                           |
| Geobacter<br>Rf4 | uraniireducens<br>CP000698.1 | 2518900-2518824 | AAACGATAATACTCAACCATCCGCGAGGGTGGGGCGGAAAGCCTACAGGGTCTCACTGAGACAGCCGGGTGCGCGAA                                                                                           |
| Geobacter<br>Rf4 | uraniireducens<br>CP000698.1 | 2885785-2885709 | AGACGATAATACTAAACCACCTGTGAAGGTGGGGCGGAAAGCCTATTGGGTCTCCAGGAGACAGCCGGGTGCGCGAA                                                                                           |
| Geobacter<br>Rf4 | uraniireducens<br>CP000698.1 | 2697411-2697487 | AGACGATAATACTAAACCATCCGCAAGGATGGGGCGGAAAGCCTAAAGGGTCTCACTGAGACAGCCGGGTGCGCGAA                                                                                           |
| Geobacter<br>Rf4 | uraniireducens<br>CP000698.1 | 2035506-2035430 | AGCCGATAATACTCAACCATCCGCGAGGATGGGGCGGAAAGCCTACTGGGTCTCACCGAGACAGCCGGGTGCGCGAA                                                                                           |
| Geobacter<br>Rf4 | uraniireducens<br>CP000698.1 | 2356837-2356914 | ACACGATAATACTAAACCATCCGTGAGGGTGGGGCGGAAAGCCTATAGGGTCTCAAGTCAGACAGCCGGGTGCGCGAA                                                                                          |
| Geobacter<br>Rf4 | uraniireducens<br>CP000698.1 | 3600589-3600510 | TCTCCGAACGGGCAAAACCAGAGCAATCTGGTGACGCAAAGCCACGGGTCCTGACCTAAAAGGATAGCCGGGTGCGCGAA                                                                                        |
| Geobacter<br>Rf4 | uraniireducens<br>CP000698.1 | 2692038-2691962 | AGACGAAAATACTAAACCATTGCGGAGAATGGGACGGAAAGCCTAAAGGGTCTCACCGAGACAGCCGGGTGCGCGAA                                                                                           |
| Geobacter<br>Rf4 | uraniireducens<br>CP000698.1 | 463577-463498   | TCACGATAAAGCCGAACCTCCGCAAGAAGGGGGCGGAAAGTCGCGGGTCTTCGCAGTGGAAGACGGCCGGACTGCCGAA                                                                                         |
| Geobacter<br>Rf4 | uraniireducens<br>CP000698.1 | 3898438-3898514 | AGACGACAAGGCTCAACCATTCGTGAGAATGGGGCGGAAAGCCATCGGGTCTCCACGAGACAGCCGGGTACCGAA                                                                                             |
| Geobacter<br>Rf4 | uraniireducens<br>CP000698.1 | 2519084-2519009 | AGACGATAATACTTAACCATTCGCAAGAATGGGGCGGAAAGCCTACGGGTCTTACTGAGACAGCCGGGTGCGCGAA                                                                                            |
| Geobacter<br>Rf4 | uraniireducens<br>CP000698.1 | 2025185-2025022 | GACTTGAAATGCCAAACCTTGAGCAATCAGGGGACGGAAAGCCAACGGGACTTGGGTTCGAATGAATTCCAATGAATTGACTCCGTCTGTCATTGAATC<br>TGCTTCCCTTGTTAATATAGTTTCTCCACAAGATGTTATTCTCCAAGTTGGCCGGGTGCGCGTT |
| Geobacter        | uraniireducens<br>CP000698.1 | 3601129-3601051 | TCTCCGAACGGGCAAAACCAGAGTAATCTGGTGACGCAAAGCCACGGGTCCTGACCTAAAGGATAGCCGGGTGCGCGAA                                                                                         |

|                                               |                |                 |                                                                                               |
|-----------------------------------------------|----------------|-----------------|-----------------------------------------------------------------------------------------------|
| RF4                                           |                |                 |                                                                                               |
|                                               |                |                 |                                                                                               |
| Grimontia hollisae CIP<br>101886 VHA.Contig67 | ADAQ01000013.1 | 435861-435954   | TCAAGAAAAAGGCAAACCATGGCGAAAGCCTGGGACGCAAAGCTTCCGGCCTCACACGGTATATATTTACGTGTTGGTAGCGGAGTTACCGAA |
|                                               |                |                 |                                                                                               |
| Grosmannia clavigera<br>kw1407 contig_10856.0 | ACYC01000191.1 | 501-591         | ATTATTCATCGGTAAAACTATTGAAGATAGTGACACAAAGCCAAGGGTCTAAGGTCCTTCCAAACGGGATTATGACAGTCCGGTTGCCACA   |
|                                               |                |                 |                                                                                               |
| Halanaerobium<br>hydrogeniformans             | CP002304.1     | 314539-314628   | TAAATATAAAAGCAAAATAGTTGAAAGACTATCACGCAAAAGCTTGAGTCTAAAGGGTTTAAATATTCTATGATCGTCAAGCCTGCCTCG    |
| Halanaerobium<br>hydrogeniformans             | CP002304.1     | 299132-299215   | AAAAATAAAAGGCAATTCAATCGAAAGGTTGTTACGCAAAAGTCTGAATCTACGGGGGTACCCTATGATTGTCAGCTTGCCTCA          |
| Halanaerobium<br>hydrogeniformans             | CP002304.1     | 2552413-2552502 | TAATATTAATAGCAAAATATTCGAAAGATTATTACGCAAAAGCTTGAATCTAAGGAGTTTAAATATTCTATGATTGTCAAGCCTGCCTCA    |
| Halanaerobium praevalens<br>DSM 2228          | CP002175.1     | 611770-611857   | AATAAATATTAGCAAAATTAGCGAAAGTTGATGACGCAAAAGTTATGGGTCTAAGATATTTAATATATTATGATTGCCAAACTGCACAG     |
| Halanaerobium praevalens<br>DSM 2228          | CP002175.1     | 187732-187818   | TTTTAATAAAAGCAAAACAATTGAAAAATTGTGACGCAAAAGATCTGAATCTAAAGCTAAATTAGCAATGATTGTCAGATTACCTCA       |
| Halanaerobium praevalens<br>DSM 2228          | CP002175.1     | 937363-937448   | TAAAATAAAAGCAAAACAACCTAAAGGTTGTTACGCAAAACATAGGTCTAAAGCTTTTAAGCCATGACTGTTATGTCTGCCTCA          |
|                                               |                |                 |                                                                                               |
| Haloplasma contractile<br>SSD-17B Contig22    | AFNU01000022.1 | 54226-54303     | TAATGTAAAAGGCAGCGTTAGAGAAATCTAAGCGTACGCAAAAGCTATAGGGCCTGTAAATGGTAGCCAGTTGTCATT                |
| Haloplasma contractile<br>SSD-17B Contig22    | AFNU01000022.1 | 53497-53571     | GTATGACAAAGCTAAACCCGGAGCGATCCGGCGGCAGAAAACCTATAGGGTCTCACGTAGATAGCCAGTTACCTTA                  |

|                                      |                |               |                                                                                                                         |
|--------------------------------------|----------------|---------------|-------------------------------------------------------------------------------------------------------------------------|
| Halothermothrix orenii H<br>168      | CP001098.1     | 769989-769887 | GACCGATAAAGGCAAACCTGTCGAAAGGCAGGGACGCAAAACCACGGGCCTGTAGCCTTATATAAAAAAACTTATATAAGGTATGGCAGCCGGGTTA<br>CCGAA              |
| Halothermothrix orenii H<br>168      | CP001098.1     | 769828-769735 | CTCCGGAAATGGTAAACCCATCGAAAGGTGGGGACACAAAGTCACGGGCCTGTAGCCGGTTATTTTAAACCGGTATGGCAGCCGGACTGCCGAA                          |
|                                      |                |               |                                                                                                                         |
| Heliobacterium<br>modesticaldum Ice1 | CP000930.2     | 120402-120314 | CCGTGACAAGGGCAAACCTGCCTAAAGGCCGGGACGCAAAAGCCATAGGGTCTAAGGTGCTTAAAGCGCTATGACAGCCTGGTTGCCGCA                              |
|                                      |                |               |                                                                                                                         |
| Hot springs metagenome<br>ctg6135    | AFSR01006659.1 | 13392-13476   | AGCAGAAAAGGGCAAACCTGTAGCGATGCAGGGGCGCAAAGCCTACGGGTCTGTCTGCTACTCGCGGCAGATGGCTGGGTTGCCTGC                                 |
|                                      |                |               |                                                                                                                         |
| Human gut metagenome<br>DNA          | BAAU01014367.1 | 523-611       | TACCCATAAGAGCACACTTATGGAAACATAGGGTCGCAAAGCCAGAGTCTAGAACAGTTACATGTAGTCCTGACCGTTCGGCTGCAACA                               |
| Human gut metagenome<br>DNA          | BAAV01015941.1 | 250-162       | TAACCATAAGGGCACACTTATGGAAACGTAAGGCCGCAAAGCCAGAGTCTAAAACAGTTACATGTAGTAATGACAGTTCGGCTGCAACA                               |
| Human gut metagenome<br>DNA          | BAAV01003376.1 | 1495-1610     | ACAAAAGAGGGGTAAACCTGCAGAAATGCAGGGACACAAAGCTACAAGTCTAAGTTGATTAGTGGTCTGGGGAGTATTGGATATATTGAAGATATAAG<br>ATGGTTGAGTTGCAGAT |
| Human gut metagenome<br>DNA          | BAAV01001975.1 | 1028-1116     | TAACCATAAGGGCACACTTATGGAAACATAGGGTCGCAAAGCCAGAGTCTAAAACAGTTACATGTAGTAATGACAGTTCGGCTGCAACA                               |
| Human gut metagenome<br>DNA          | BAAW01004042.1 | 393-479       | AAATTTAATAGGCAAACCTTAGGGAAATCTAAGGGCGCAAAGCTATAGGGACTAATGTTTAAATAAACTATGTCAGCCAGTTGCCAAA                                |
| Human gut metagenome<br>DNA          | BAAZ01012664.1 | 144-218       | CAAGTCCACAGGCAAACCCGGTGCAAACCGGCGACGCAAAGCTATAGGGGCCCATCGGGTCAGCCAGTTGCCAAC                                             |
| Human gut metagenome                 | BABG01012220.1 | 305-215       | TTATTTTAAAGGCAAACCTGTTGAAAGGCAGGGTCGCAAAGCCAGAAGGGACTAAAGTCAGAAAGCTTGACCATGTCAGCCGGTTGCCACT                             |

|                             |                |           |                                                                                           |
|-----------------------------|----------------|-----------|-------------------------------------------------------------------------------------------|
| DNA                         |                |           |                                                                                           |
| Human gut metagenome<br>DNA | BAA01018648.1  | 293-368   | TAGAATATTTAGCAAAGCAGTTGAAAAGCTGTGACGCAAAGCTAAAGGGCCTGTAAAATGGTAGCCAGTTGCATTT              |
| Human gut metagenome<br>DNA | BAA01003288.1  | 2-77      | GAATATCCTCGGCAAAGCAGTCGAAAGGCTGTGACGCAAAGCTATAGGGCCTGTAAAATGGCAGCCAGTTGCTTCT              |
| Human gut metagenome<br>DNA | BAAU01021153.1 | 820-737   | TGTTAAAAGGGCAAAGCTGTTGAAAACTGTGACGCAAAGCCAAAGGGACTAAGGCAGTACGCTATGTCAGCCGGTTGCAATA        |
| Human gut metagenome<br>DNA | BAA01009490.1  | 528-603   | TGAAAACGATGGCAAAGCAGGCGAAAGCCTGTGACGCAAAGCTATAGGGCCTTCAAATGGCAGCCAGCTGCAACC               |
| Human gut metagenome<br>DNA | BAAW01006249.1 | 293-212   | AATTTAATAGGGCAAAGCAGTTGAAAAGCTGTGACGCAAAGCTAAAGGGCCTTTTCCTAATGGATGGCAGCCAGTTGCATTT        |
| Human gut metagenome<br>DNA | BAA01009326.1  | 687-613   | AAATGCTATCGGCAAACCCGGCGCAAGCCGGCGGCGCAAAGCTACAGGGACCCATTGGGTCAGCCAGCTGCAATC               |
| Human gut metagenome<br>DNA | BAA01001440.1  | 1679-1604 | GAATATCCTCGGCAAAGCAGTCGAAAGGCTGTGACGCAAAGCTATAGGGCCTGTAAAATGGCAGCCAGTTGCTTCT              |
| Human gut metagenome<br>DNA | BAB01032311.1  | 322-234   | TAACCATAAGGGCACACTTATGGAAACATAGGGTCGCAAAGCCAGAGTCTAAAGCAGTTACATGTAGTAATGACAGTTCGGCTGCAACA |
| Human gut metagenome<br>DNA | BABE01017342.1 | 975-887   | ATTAGGAAAAGGCAACCGGTGAAAGACAGGGACGCAAAGCCAGAAGGGACTAAAGTCAGAAAGTTGGACCAGGTCAGCCGGTTGCCACG |
| Human gut metagenome<br>DNA | BABD01024787.1 | 545-457   | CACCTATCAAGGCACACTTATGGAAACATAAGGTCGCAAAGCCAGAGTCTAAAACAGTTACACGATGTAATGACAGATCGGCTGCATCA |
| Human gut metagenome<br>DNA | BAA01001646.1  | 1865-1939 | CAGAAGAATCGGCAAACAGCTGGAAGGCTGCGACGCAGAGCTAAAGGGCCAGACCGGGCAGCCAGCTGTACTT                 |
| Human gut metagenome<br>DNA | BABE01019247.1 | 234-157   | TTATTTTAAAGGCAAACCTGTTGAAAGGCAGGGTCGCAAAGCCAGAAGGGACTAAAGTCAGAAAGTTTGACCGACGTA            |

|                             |                |             |                                                                                                       |
|-----------------------------|----------------|-------------|-------------------------------------------------------------------------------------------------------|
| Human gut metagenome<br>DNA | BAAY01001122.1 | 2291-2382   | CTTAATACTTGGTAAACCTACCGAAAGATAGGGCAACAAAGCTAAATGAGTCTAAAATCTCATATACGAGGTCATGGCAGCTGGTTGCTTTT          |
| Human gut metagenome<br>DNA | BABB01000152.1 | 8484-8568   | TTAGCATGATAGCAAACCTTATAGAAATATAAGGACGCAAAGTTAGAAATCTAAGGCATATAAGCATAGATAGTTCGGTTGCAATG                |
| Human gut metagenome<br>DNA | BABB01000610.1 | 5225-5313   | TAACCATAAAGGCACACTTATGGAAACATAGGGTCGCAAAGCCAGAGTCTAAAACAGTTACATGTAGTAATGACAGTTCGGCTGCAACA             |
| Human gut metagenome<br>DNA | BAAY01002056.1 | 2733-2635   | CTCATATTTTGGCAAACCGCCGAAAGGCGGCGACGCAAAGCCAGATGGGTCTAACGCCTCTCCGAATGGAGAATACGCTATGACAGCCGTTGCACC<br>C |
| Human gut metagenome<br>DNA | BAAU01015418.1 | 148-74      | CAAGTCCACAGGCAAACCCGGTGCAAACCGGCGACGCAAAGCTATAGGGGCCATCGGGTCAGCCAGTTGCCAAC                            |
| Human gut metagenome<br>DNA | BAAU01005913.1 | 1649-1574   | GAACATTCTTGGCAAAACAGTCGAAAGGCTGTGACGCAAAGCTATAGGGCCTGTAAAATGGCAGCCAGTTGCTTCT                          |
| Human gut metagenome<br>DNA | BABG01006932.1 | 741-829     | TAACCATAAGGGCACACTTATGGAAACGTAAGGTCGCAAAGCCAGAGTCTAAAACAGTTACATGTAGTAATGACAGTTCGGCTGCAACA             |
| Human gut metagenome<br>DNA | BAAY01027138.1 | 877-802     | TCAAAGAATCGGCCAACCAGTCGAAAGGCTGCGACGCAAAGCTAAAGGGCCTGTAATATGGCANCCAGCTGCACCT                          |
| Human gut metagenome<br>DNA | BABG01009184.1 | 345-270     | TTTATAAATGGGCAAAGCAGTCGAAAGGCTGTGACGCAAACTATAGGGCCTGTAAAATGGCAGCCAGCTGCAGAA                           |
| Human gut metagenome<br>DNA | BABB01000032.1 | 11550-11638 | CACCTATCAAGGCACACTTATGGAAACATAAGGTCGCAAAGCCAGAGTCTAAAACAGTTACACGATGTAACGACAGATCGGCTGCATCA             |
| Human gut metagenome<br>DNA | BAAU01012059.1 | 639-714     | TTGAAGAATCGGCAAACCCAGTCGAAAGGCTGCGACGCAAAGCTACAGGGCCTGTAATATGGCAGCTAGCTGCCCTT                         |
| Human gut metagenome<br>DNA | BAAV01025425.1 | 340-265     | AAATATATTAGCAAAGCAGGTGAAAACCTGTGACGCAAAGCTATAGGGCCTTTAAAATGGCAGCCAGTTGCACTT                           |
| Human gut metagenome        | BABG01008815.1 | 532-444     | AAACGATAATAGCAAACCCACCGAAAGGTGGCGACGCAAAGCTATAGGGCCTTACCCCTCATCGAGAGGGCTGGCAGCCAGTTACCGAA             |

|                             |                |           |                                                                                                                                                 |
|-----------------------------|----------------|-----------|-------------------------------------------------------------------------------------------------------------------------------------------------|
| DNA                         |                |           |                                                                                                                                                 |
| Human gut metagenome<br>DNA | BAAV01008805.1 | 235-321   | TTAATATATTGGCAAAGTAGTCGAAAGGCTATGACGCAAAGCCAAGGGTCTTAACTGATTTTATCAGAATGACAGCCGGTTGCATTA                                                         |
| Human gut metagenome<br>DNA | BAAV01000762.1 | 3032-3107 | TTAAAAATACAGCAGAGCAGCAAAAATCTTGTGACACAAAGCTATAGGGCCTGATATATGGCAGCCAGTTGCAACA                                                                    |
| Human gut metagenome<br>DNA | BAAx01001792.1 | 39-114    | TAGAAAGATCAGCAAGCCAGTCGAAAGGCTGCGACGCAAAGCGAAAGGGCCTGTAATATGGCAGCCAGCCGCACGT                                                                    |
| Human gut metagenome<br>DNA | BAAV01002604.1 | 131-55    | CTGAAGAATCGGCAAACCAAGTCGAAAGGCTGCGACGCAAAGCTACAAGGGCCTGTAATATGGCAGCCAGCCGCACGT                                                                  |
| Human gut metagenome<br>DNA | BAAV01005638.1 | 523-614   | TGTATAAAAGGGCACACTTATGGAAACGTAAGGTCGCAAAGCTAGAGTCTAACACGGAGTAACATTTATGTAATGACAGATCGGCTGCAACA                                                    |
| Human gut metagenome<br>DNA | BABB01013864.1 | 347-435   | CACCTATCTTGGCACACTTATGGAACTTAAGGTCGCAAAGCCTGAGTCTAAAACAGTTACACGATGTAATGACAGATCGGCTGCGTCA                                                        |
| Human gut metagenome<br>DNA | BAAV01015471.1 | 827-740   | AAACGATAATAGCAAACCCGGTGAAAACCGGCGACGCAAAGCTATAGGGCCTTACCCCTGGGAACAGGGCTGGCAGCCAGTTACCGAA                                                        |
| Human gut metagenome<br>DNA | BABA01033305.1 | 96-171    | TAGAATATATAGCAAAGCAGTTGAAAAGCTGTGACGCAGAGCTAAAGGGCCTGTAAAATGGTAGCCAGTTGCATAT                                                                    |
| Human gut metagenome<br>DNA | BABD01001177.1 | 2901-2825 | CTGAAGAATCGGCAAGCCAGTCGAAAGGCTGCGACGCAAAGCTACAAGGGCCTGTAATATGGCAGCCAGCCGCACGT                                                                   |
| Human gut metagenome<br>DNA | BAAV01014501.1 | 515-652   | AAGTAAATATAGCAAACCTTATAGAAATATAAGGACGCAAACTAGAAAGTCTAGAGGTATAAAGCTGAAAAACACTATTTTCAGTTGAGAGATTCACATAA<br>GCATAAGTCTCTAATACTATGATAGTTCGGTTGCATTA |
| Human gut metagenome<br>DNA | BAAZ01002932.1 | 945-1031  | TTAATATATTGGCAAAGTAGTCGAAAGGCTATGACGCAAAGCCAAGGGTCTTAACTGATTTTATCAGAATGACAGCCGGTTGCATTA                                                         |
| Human gut metagenome<br>DNA | BABA01009840.1 | 878-803   | TAAGGAAATCGGCAAACCAAGATGAAAGTCTGGGACGCAAAGCTACAGGGCCTGTAAAATGGCAGCCAGTTGCATGA                                                                   |

|                                                     |                |           |                                                                                                    |
|-----------------------------------------------------|----------------|-----------|----------------------------------------------------------------------------------------------------|
| Human gut metagenome<br>DNA                         | BABA01028447.1 | 760-850   | CTGAGAGATAGGCAAACCCATCGAAAGATGGGGGACGCAAAGCCGGAAGGGTCTAAGGCGGCGAACGCCGAATGACAGCCGGTTGTAAGC         |
| Human gut metagenome<br>DNA                         | BAA01014683.1  | 171-95    | CTGAAGAATCGGCAAGCCAGTCGAAAGGCTGCGACGCAAAGCTACAAGGGCCTGTAATATGGCAGCCAGCCGCACGT                      |
| Human gut metagenome<br>DNA                         | BABF01002553.1 | 73-1      | TATTAGTAATGGCAAACTGTGAAAGGCAGCGACGCAAAGCTAAAGGACGAATTCACCCGGGAAGTCTGCTA                            |
| Human gut metagenome<br>DNA                         | BABB01000741.1 | 1023-935  | CACCTATCAAGGCACACTTATGGAAACATAAGGTCGCAAAGCCAGAGTCTAAAACAGTTACACGATGTAATGACAGATCGGCTGCATCA          |
| Human gut metagenome<br>DNA                         | BAAU01027867.1 | 102-27    | CTGAAGAATCGGCAAACCAAGTCGAAAGGCTGCGACGCAAAGCTACAGGGCCTGTAACATGGCAGCCAGCTGCACGG                      |
| Human gut metagenome<br>DNA                         | BAA01030081.1  | 526-451   | GAATATTCTCGGCAAAACAGTCGAAAGGCTGTGACGCAAAGCTACAGGGCCTGTAAAATGGCAGCCAGCTGCTTCT                       |
| Human gut metagenome<br>DNA                         | BAA01030081.1  | 325-250   | GAATATCCTCGGCAAAGCAGTCGAAAGGCTGTGACGCAAAGCTATAGGGCCTGTAAAATGGCAGCCAGTTGCTTCT                       |
| Human gut metagenome<br>DNA                         | BAAU01000896.1 | 3213-3288 | TAGAATATTTAGCAAAGCAGTTGAAAAGCTGTGACGCAAAGCTAAAGGGCCTGTAAAATGGTAGCCAGTTGCATT                        |
| Human gut metagenome<br>DNA                         | BABD01006876.1 | 1215-1140 | AGATATATTCAGCAAAGTAATCGAAAGGTTATGACGCAAAGCTAAAGGGGCTTTAAAATGCTAGCCAGTTGCAATA                       |
|                                                     |                |           |                                                                                                    |
| Hydra magnipapillata strain<br>105 ctg1101284715335 | ABRM01031829.1 | 2234-2318 | AGTGCTTATGGGTAAACCCGTTGAAAGACGGGGACACAAAGCCACCGACCTACAGCATCAATGCCATGGTAGCGGGGCCGCAAT               |
|                                                     |                |           |                                                                                                    |
| Hydrothermal vent<br>metagenome FOSS10795.x2        | ACQI01022275.1 | 167-70    | ATACGATAAAGGCAAACCTTGCTGAAAAACAGGGGCGCAAAGTTTCGGGCCTAATGCATTAGTGCTTTAGCTCAATGTAAGGGCGGCCGACTGCCGAA |
| Hydrothermal vent                                   | ACQI01023578.1 | 1-62      | GATAAGGGCGCAAGCTATAGGGGCTAAGGCAGTTTTTCTGCTATGCCAGCCAGCTGCCGGT                                      |

|                                              |                |             |                                                                                                         |
|----------------------------------------------|----------------|-------------|---------------------------------------------------------------------------------------------------------|
| metagenome FOSS12552.x2                      |                |             |                                                                                                         |
| Hydrothermal vent<br>metagenome FOSS14305.y2 | ACQI01024947.1 | 716-625     | TCCCGATAATGGCAAACCGCCTGAAAAGGCGGGACGCAAAGCTACCGGCCTAAATACCTGATCATCCGGTGTATGGCAGCGGGGCTATCGAA            |
| Hydrothermal vent<br>metagenome LCHCB.C2194  | ACQI01002194.1 | 2641-2719   | ATTTAACATGGGCAAACCGGTCGAAAGGCTGGGGCGCAAAGCTATGGGCCTAAATCTTTTTGATATGGTTGCCAGGTT                          |
| Hydrothermal vent<br>metagenome LCHCB.C235   | ACQI01000235.1 | 99-19       | CAACATTGAAGCCAAACTTATTGTGAGATAAGGACGGAAAGCCGTGGATCTTGTAGTCAACAAGACTGCCTGGTTACTCAA                       |
| Hydrothermal vent<br>metagenome LCHCB.C3667  | ACQI01003667.1 | 1152-1233   | AAC TTGATGTGCCAAACTTGTGTGAAGCAGGGACGGAAAGCCATGGGTCTCGGTCTGAATCGAGATCGCCAGGTTGCAAAA                      |
| Hydrothermal vent<br>metagenome LCHCB.C4499  | ACQI01004499.1 | 1203-1294   | ACAATCTATTGCCAAACTTCGTGTGAACGTAGGACGGAAAGTTACAGGTCTTAATTGCTTTAAAAACAATTCAAGATGGCTGAACTGCATTT            |
| Hydrothermal vent<br>metagenome LCHCB.C762   | ACQI01000762.1 | 1971-1897   | ATAATGCTGTGCCAAACTTGTGTGAAGCAGGGACGGAAAGCCATGGGTCTCCTCGAGATCGCCAGGTTGCCATA                              |
|                                              |                |             |                                                                                                         |
| Hylemonella gracilis ATCC<br>19624 Contig33  | AEGR01000054.1 | 7557-7473   | CATGAGGCAAGGCACACCTGCGCGAAAGCCAGGGTCGCAAAGCTACCGGTCTACGTCCAGACGACACGACAGCGGGGTTGCCAGA                   |
| Hylemonella gracilis ATCC<br>19624 Contig42  | AEGR01000064.1 | 1711-1614   | TTCTTCCCAAGGCACACCTGTCCGAAAGGCGGGGTCGCAAAGCCACCGGTCTAACGCAGCGGCGCGAAGCGCACTGACACGATAGCGGGGCTGCCAG<br>G  |
| Hylemonella gracilis ATCC<br>19624 Contig8   | AEGR01000102.1 | 86229-86131 | ATCACACAAAGGCACACCCGAGCGAAAGCCGGGGTCGCAAAGCTTCCAGTCTAAAGTAGCTCGCGGACCGCGAGCCGCCAAGATCGTGGGGCCGCTG<br>TC |
|                                              |                |             |                                                                                                         |
| Hypersaline lake<br>metagenome contig00001   | AGBJ01000001.1 | 35352-35278 | TATTGAAAAAGCCAAGTTCATCGCGAGGTGGGTACGAAAGTCATGGGTCTCACGTAGATCGCCAGACTACCAAT                              |
| Hypersaline lake<br>metagenome contig00051   | AGBJ01000051.1 | 14847-14773 | TTTTGAAAAAGCCAAACTTATCGTGAGGTAAGGACGGAAAGCCACGGATCTCAAGAAGATAGCCGGGTCACCAAA                             |



|                                            |                |           |                                                                                                 |
|--------------------------------------------|----------------|-----------|-------------------------------------------------------------------------------------------------|
| Hypersaline lake<br>metagenome contig00129 | AGBJ01000129.1 | 6923-6849 | TAGTTTAAACAGCTAAACGCATTGTGAAGTGGGGGCAGAAAACCATAGGTCTTTTACGATTGCTGGGTTCCAGAC                     |
| Hypersaline lake<br>metagenome contig00741 | AGBK01000741.1 | 410-336   | GGCCGACAAAGGCAAACTCGGGGTAACCCGAGGGCGCAAAACCACGGGTCCTTACAGGACAGCCGAGTTACCGTA                     |
| Hypersaline lake<br>metagenome contig00741 | AGBK01000741.1 | 1237-1159 | ACCTGAAAAGGGCAAAACTGCGGCAACGCAGTGACGCAAAGCTCAGGATCCTTACAAAAAGGACGGCCGGGCTGCCAAG                 |
| Hypersaline lake<br>metagenome contig01078 | AGBJ01001078.1 | 1926-2004 | ATTTTGTGTGCCAAACTTGTGTGAAGCAAGGACGGAAAGCTATGGGTCTTAAACATGAAGATCGCCAGGCTGCCAAA                   |
| Hypersaline lake<br>metagenome contig01078 | AGBJ01001078.1 | 1771-1848 | TATTTGTTGTGCCAAACTTGTGTGAAGCAAGGACGGAAAGCCATGGGTCTTAACTGCAAGATCGCCAGGTTGCCAAA                   |
| Hypersaline lake<br>metagenome contig01178 | AGBK01001178.1 | 944-1031  | TCCCGAGAAGGGTAACCCCGCCGAAGGTGGGCGCACAAAGTCAACGGGCCCCAACCTCGTATAGAGGCGGGCGCCAGGCTGCCGAA          |
| Hypersaline lake<br>metagenome contig03642 | AGBK01003642.1 | 572-493   | TCCCGAGAAGGGTAACCCCGCCGAAGGTGGGCGCACAAAGTCAACGGGCCCCAACCTCGTATAGAGGCGGGCTGCCGAA                 |
| Hypersaline lake<br>metagenome contig05180 | AGBK01005180.1 | 593-506   | TGCCGAGAAGGGTAACCCCACTGAAAGGTGGGCGCACAAAGTCAACGGGCCCCAACCTTCGTATAGAGGCGGGCGCCGGGCTGCCGAA        |
| Hypersaline lake<br>metagenome contig05904 | AGBK01005904.1 | 90-3      | TCCCGAGAAGGGTAACCTCGCCGAAGGCGGGCGCACAAAGTCGACGGGCCCCAACCTCGTATAGAGGCGGGCGCCGGGCTGCCGAA          |
| Hypersaline lake<br>metagenome contig05954 | AGBK01005954.1 | 266-188   | TTACGAAAAGGCAAACTCGGGGTAACCTGAGGACGCAAAACCACGGGTCTCTCAAAGAGGATAGCCGGGCTGCCGTG                   |
| Hypersaline lake<br>metagenome contig05954 | AGBK01005954.1 | 326-272   | ATCTATAAATGGCAAACCGGGGGCAACCCCGGGGCGCAAAGCTACGGCCTCTAAG                                         |
| Hypersaline lake<br>metagenome contig07839 | AGBK01007839.1 | 435-339   | CCTTGAAAAGGCTAAGTTATCGTGAGATAACCTCGCAAAGCCACGGGTCAGTTCATGAGGTGAAGTTTACAGGAACTGATAGCCGGGTTGCCAGG |
| Hypersaline lake                           | AGBK01007888.1 | 346-438   | TCCCGAGAAGGGTAACCCCGCCGAAGGCGGGCGCACAAAGTCACGGGCCCTACCCTCTAGAAGGAAAAGAGGCGGGCAGCCGGGCTGCCGAA    |

|                                                    |                |               |                                                                                               |
|----------------------------------------------------|----------------|---------------|-----------------------------------------------------------------------------------------------|
| metagenome contig07888                             |                |               |                                                                                               |
| Hypersaline lake<br>metagenome contig08518         | AGBK01008518.1 | 398-311       | TCCCGAGAAGGGTAACCCACCGAAAGGTGGGCGCACAAAGTCACGAGCCCTACTCCTTTTAATAGGAAGGGCAGCCGGGCTGCCGAA       |
| Hypersaline lake<br>metagenome contig09049         | AGBK01009049.1 | 120-196       | TTACGAAAAGGCAAACTCCGGGCAACCTGGGGGCGCAAAACCACGGGTCTCGTAGAGGATAGCCGGGCTGCCGTG                   |
| Hypersaline lake<br>metagenome contig09750         | AGBK01009750.1 | 240-153       | TCCCGAGAAGGGTAACCCGCCGGAAGGTGGGCGCACAAAGTCAACGGGCCCAACCTCGTATAGAGGCGGGCGCCGGACTGCCGAA         |
| Hypersaline lake<br>metagenome contig11975         | AGBK01011975.1 | 21-102        | TGGTCGAAAAGGTAAACCGGACGAACTCCGGGGCACAAAGCTTCCGGGTCCGACAACGATTACGGGCCGCGGAGCTGCCGAA            |
|                                                    |                |               |                                                                                               |
| Idiomarina baltica OS145<br>1099451322285          | AAMX01000014.1 | 21204-21112   | TTGTTTAACTGCCAAACTCATCGCGAGATGAGGACGGAAAGCCACGGGTCTCAGAGTGTGTTGAGATGTATCTCAGATAGCCGGGTTGCCGAA |
| Idiomarina baltica OS145<br>1099451322285          | AAMX01000014.1 | 21303-21217   | ACTTGAGTCGGCCAAACCCTCCGTGAGGCGGGACGGAAAGCTTCGGGTCTTCTAAAAATAAAAACGAAGATAGCCGGGTTGCAGCT        |
|                                                    |                |               |                                                                                               |
| Ilyobacter polytropus DSM<br>2926 plasmid pILYOP01 | CP002282.1     | 410241-410316 | TATAGAAAAAGCAAACCTTTGGAAACAAAGGGACGCAAAGCTATAGGGCCTGTAAGATGGTAGCCAGTTGCCGAA                   |
| Ilyobacter polytropus DSM<br>2926 plasmid pILYOP01 | CP002282.1     | 419280-419205 | AAAAATATCGGCAAACCATTTGGAAACAATGGGACGCAAACTATAGGGCCTTTAAATGGCAGCCAGTTCCCGAG                    |
| Ilyobacter polytropus DSM<br>2926 plasmid pILYOP02 | CP002283.1     | 7971-8046     | CTATATTAATAGCAAACCATTTGGAAACGATGGGACGCAAAAGCTATAGGGCCTTTAATGTGGCAGCCAGTTACCAA                 |
| Ilyobacter polytropus DSM<br>2926 plasmid pILYOP02 | CP002283.1     | 47080-47005   | AAAAATATTCGGCAAACCTAATGGAAATGTTAGGACGCAAACTATAGGGCCTTTAAATGGCAGCCAGTTGCAAAA                   |
| Ilyobacter polytropus DSM<br>2926 plasmid pILYOP02 | CP002283.1     | 122888-122974 | CTCCGAAAAAGGTAAACAGGAGAAATCCTGTGACACAAAACCTATAGGGTCTAATTCTTCTTAAGATATGACAGCCAGTTGTCGAG        |

|                                                                 |                |               |                                                                                               |
|-----------------------------------------------------------------|----------------|---------------|-----------------------------------------------------------------------------------------------|
| Ilyobacter polytropus DSM<br>2926 plasmid pILYOP02              | CP002283.1     | 7218-7143     | TGAATTATTTGGCAAACCTAATGGAAACGTTAGGACGCAAAGCTATAGGGCCTTTAAATGGTAGCCAGTTGCAGAA                  |
|                                                                 |                |               |                                                                                               |
| Kuenenia stuttgartiensis<br>genome fragment KUST_C<br>(3 of 5). | CT573073.1     | 544510-544431 | TTTGAAAAAAGGCAAACCAATTGTGAGGCTGGGACGCAAAGCCATGGGTCTTCAGGAAAGAAGAATGCCAGGTCGCCAAA              |
| Kuenenia stuttgartiensis<br>genome fragment KUST_C<br>(3 of 5). | CT573073.1     | 545352-545273 | TTTGAAAAAAGGTAAACCAATCGTGAGGTTGGGACACAAAGCCATGGGTCTTCTTAAAGAAGAATGCCAGGTTGCCAGA               |
| Kuenenia stuttgartiensis<br>genome fragment KUST_D<br>(4 of 5). | CT573072.1     | 134369-134453 | TATCGATAAAGGCAAACCCTGAGCAATCAGGGGACGCAAAGTAAAAGGTCTTTACTTACAGTACAAAGATAGCCTTACTACCGAT         |
| Kuenenia stuttgartiensis<br>genome fragment KUST_D<br>(4 of 5). | CT573072.1     | 491002-491095 | GATTGAAAAAGGCAAACCAACCGCAAGTTGGGACGCAAAGCCATGGGTCTTAAGCGTGAGTTCTTTATACGTAAAGATTGCCAGGTTGCCGAA |
| Kuenenia stuttgartiensis<br>genome fragment KUST_E<br>(5 of 5). | CT573071.1     | 309575-309657 | ATGTGAAAAAGGCAAACCAATCGTGAGGTTGGGGCGCAAAGCCATGGGGCTTCGGAAATACCGAAGCTCGCCAGGTCGCCATG           |
| Kuenenia stuttgartiensis<br>genome fragment KUST_E<br>(5 of 5). | CT573071.1     | 153651-153732 | TGCATACAAAGGCAAACCAATCGTGAGGTTGGGACGCAAAGCCATGGGTCTTATTTTTTGGAAAGAATGCCAGGTTGCCACC            |
|                                                                 |                |               |                                                                                               |
| Lachnospiraceae bacterium<br>3_1_57FAA_CT1 cont1.109            | ACTP01000109.1 | 333-248       | AACTACATTTCGGCAAACCTATTGAAAAGTAAGGACGCAAAAGCTACAGGGCCTTCCCTTAAAAAGGATGGCAGCCAGCTGCCGGT        |
| Lachnospiraceae bacterium                                       | ACTP01000109.1 | 519-436       | TTTAATACTTGGCAAACCTTGCTGAAAAGCAAGGACGCAAAGCTACAGGGCCTTCCCTCAAAGAGGATGGCAGCCAGTTGCCTGA         |

|                                                      |                |                 |                                                                                              |
|------------------------------------------------------|----------------|-----------------|----------------------------------------------------------------------------------------------|
| 3_1_57FAA_CT1 cont1.109                              |                |                 |                                                                                              |
| Lachnospiraceae bacterium<br>3_1_57FAA_CT1 cont1.141 | ACTP01000141.1 | 673-600         | GGCAAACCTTGCTGAAAAGCAAGGACGCAAAGCTACAGGGCCTTCCCTCAAAGAGGATGGCAGCCAGTTGCCTGA                  |
| Lachnospiraceae bacterium<br>3_1_57FAA_CT1 cont1.141 | ACTP01000141.1 | 497-413         | AACTACATTCGGCAAACCTTATTGAAAAGTAAGGACGCAAAGCTACAGGGCCTTCCCTTAAAAAGGATGGCAGCCAGCTGCCGGT        |
| Lachnospiraceae bacterium<br>3_1_57FAA_CT1 cont1.36  | ACTP01000036.1 | 150469-150544   | TATAAATTTTAGCAAAACAGTCGAAAAGATTGTGACGCAAAGCTATAGGGCCTGTAATATGGTAGCCAGTTGCAAAT                |
| Lachnospiraceae bacterium<br>3_1_57FAA_CT1 cont1.92  | ACTP01000092.1 | 157520-157431   | GATTTCATTTGGCAAAGCCGGCGAAAGCCGGTGACGCAAAGCTAGAGGGCCTTGATCCGTTATTCCGGTATGTGGCAGCCAGTTGCAAAA   |
| Lachnospiraceae bacterium<br>3_1_57FAA_CT1 cont1.93  | ACTP01000093.1 | 127-42          | AACTACATTCGGCAAACCTTATTGAAAAGTAAGGACGCAAAGCTACAGGGCCTTCCCTTAAAAAGGAATGGCAGCCAGCTGCCGGT       |
| Lachnospiraceae bacterium<br>3_1_57FAA_CT1 cont1.93  | ACTP01000093.1 | 313-230         | TTTAACACTTGGCAAACCTTGCTGAAAAGCAAGGACGCAAAGCTACAGGGCCTTCCCTCAAAGAGGATGGCAGCCAGTTGCCTGA        |
| Lachnospiraceae bacterium<br>5_1_63FAA cont1.34      | ACTS01000034.1 | 700-610         | TTATTTTAAAGGCAAACCTGTTGAAAGGCAGGGGCGCAAAGCCAGAAGGGACTAAAGTCAGAAAGATTGACCATGTGACCCGGTTGCCACT  |
| Lachnospiraceae bacterium<br>5_1_63FAA cont1.4       | ACTS01000004.1 | 225017-224942   | TAAGGAAATTGGCAAACCATGATGAAAGTCTGGGACGCAAAGCTACAGGGCCTGTAAAATGGCAGCCAGTTGCATGA                |
| Lachnospiraceae bacterium<br>5_1_63FAA cont1.4       | ACTS01000004.1 | 53398-53311     | TTATTCATAGGGCAAACCTGTTGAAAGACAGGGACGCAAAGCCAGAAGGGTCTAAGGTCTTATTGGACTATGACAGCCGGTTGCCACA     |
| Lachnospiraceae bacterium<br>5_1_63FAA cont1.55      | ACTS01000055.1 | 28133-28058     | AAAGATTCTAGGCAAAACAGACGAAAGTCTGTGACGCAAAGCTAAAGGGCCTGTAAAATGGCAGCCAGTTGCAGAA                 |
|                                                      |                |                 |                                                                                              |
| Leptothrix cholodnii SP-6                            | CP001013.1     | 4180402-4180494 | TCAATCACAAGGCAAACGGCGTGAAAGCGCCGGACGCAAAGCCACGGGCCCTCAGGCGATTATCCGATCGCACGGGCAGCCGGGTTGCTTGC |
|                                                      |                |                 |                                                                                              |
| Listeria monocytogenes                               | CP001602.1     | 1849552-1849466 | TTGTGTTAAGGGTAAACTTGCCGAAAGGCAAGGACGCAAAGCCGAGGGTCTAAGATGCAAACGCATTATGACAGCCTAGCTGCCGTG      |

|                                              |                 |                 |                                                                                               |
|----------------------------------------------|-----------------|-----------------|-----------------------------------------------------------------------------------------------|
| 08-5578                                      |                 |                 |                                                                                               |
| Listeria monocytogenes<br>08-5923            | CP001604.1      | 1816283-1816197 | TTGTGTTAAGGGTAAACTTGCCGAAAGGCAAGGACGCAAAGCCGAGGGTCTAAGATGCAAACGCATTATGACAGCCTAGCTGCCGTG       |
|                                              |                 |                 |                                                                                               |
| Lysinibacillus fusiformis<br>ZC1 contig00014 | ADJR01000014.1  | 47207-47122     | GGGAAATATAGGCAAATTTACTGAAAAGTAAAGACGCAAAGCTACAGGTCTAAGGCAATAAATGCTATGGCGGCTGGGTTGCAAAA        |
| Lysinibacillus fusiformis<br>ZC1 contig00051 | ADJR01000049.1  | 117800-117891   | AACTGAAAAAGGCAAACCTTACCGAAAGGGAGGGACGCAAAGCCATGAGTCTAAACACTATAATTTTCAGTGCAAGATTGTCAGGTTGCCAGG |
| Lysinibacillus sphaericus<br>C3-41           | CP000817.1      | 272148-272233   | GGAAAATATAGGCAAATTTACTAAAAAGTAAAGATGCAAAGCTACAGGTCTAAGGGAATATTTACTTAGATAGCTAGGTTGCAAAA        |
|                                              |                 |                 |                                                                                               |
| Marine metagenome<br>1091141731174           | AACY021822495.1 | 361-273         | GCAGCGAAACGGCACCCCTTGAGGGAAACCAAGCTCGCAAAGTTACTGACCTAAACGCCTGACGGCGCACGGTTTGAAGAACCACCGAA     |
| Marine metagenome<br>1092963530478           | AACY020820783.1 | 446-363         | GCGCTCGAAAGGCAAGTCTCCCGAAAGGGAGTACACGCAAAGCTTCAGATCTAAGGGGAAACCTATGATGGCTGGGCTGCCGTA          |
| Marine metagenome<br>1096626182008           | AACY020159240.1 | 754-829         | CATCCGAAAAGGCAAACCAGCCGCGAGGCTGGGACGCAAAGCCAGGGGTCTCGTCAGAGACAGCCCCGCTACCGAA                  |
| Marine metagenome<br>1096626364222           | AACY024044040.1 | 795-878         | TATGTAACAAGGCACACCAGGAGTAATCCTGGGCCGCAAAGTCATGGGCCCGGCCGAGCGTTGCAAAGCAGGGTTGCCAGACCG          |
| Marine metagenome<br>1096626423965           | AACY020343240.1 | 4-92            | TTGTGCAAAAAGGCAAACCCGGATGAAAGTCCGGGACGCATAGCTTCCGGTCTAAGGGTCAGCAGTACCTAAGATAGCGGGGCCACCACA    |
| Marine metagenome<br>1096626431952           | AACY020350093.1 | 241-329         | GAAATTAAGGCAAACCTGGCCTAAAGGTCAGGACGCAAAGCCTCCGGTCTAAGGATCCAAAAGGATCTACGATAGCGGGGTTGCATTA      |
| Marine metagenome<br>1096626457847           | AACY020364809.1 | 409-494         | CCAGGTAAAGGGCAAACCGGTCGAGATGCCGGGACGCAATGCCCTCCGGTCTTTCAGATCGTGCATCCAGATAGCGGGGCTTCCAG        |

|                                    |                 |             |                                                                                                   |
|------------------------------------|-----------------|-------------|---------------------------------------------------------------------------------------------------|
| Marine metagenome<br>1096626458271 | AACY020366890.1 | 1618-1705   | TTGTGCAAAAGGCAAACCGGATGAAAGTCCGGGACGCAAAGCTTCCGGTCTAAGGGTCAGCAGTACCTAAGATAGCGGGGCCACCACA          |
| Marine metagenome<br>1096626470692 | AACY020374334.1 | 900-983     | GCGCTCGAAAGGCAAGTCTCCCGAAAGGGAGTACACGCAAAGCTGCAGATCTAAGGGGAAACCTATGATGGCTGGGCTGCCGTA              |
| Marine metagenome<br>1096626541226 | AACY020420574.1 | 1022-938    | ACACCATGAAATCAAACCTTCTTGAAAAAGAAGGTCGTAAAACTATTATCATTGGGGATCATGGTCATGATGAGGTAGTTGCAATA            |
| Marine metagenome<br>1096626782921 | AACY020349431.1 | 1659-1744   | GTAGTCATTTGGCAAACCTGGTTGAAAGGCCAGGACGCAAAGCCTCCGGTCTAAAGACATGTCGTCCAGGATAGCGGGGTTGCCACA           |
| Marine metagenome<br>1096626783697 | AACY020365487.1 | 1679-1764   | TAGAGTAAAGGGCAAACCGGTCGAAAGGTCGGGACGCAAAGCCACCGGTCTAAGGGTTCATAACCTAAGACAGCGGAGCTGCCATC            |
| Marine metagenome<br>1096626842707 | AACY020557263.1 | 8816-8723   | CACCGTATTGGGCAAACCTAATTGAAAAATTAGGACGCAAAGCCTCCGGTCTAAGGTTGTAAAAGGATGTAACTAAGATAGCGGGGTTGCTGTA    |
| Marine metagenome<br>1096626842779 | AACY020557419.1 | 5169-5082   | TTGTGTGAAAGGCAAACCAATCGAAAGATTGGGACGCAAAGCCTCCGGTCTAAGGGTTGTTAGTACCTATGATAGCGGGGATACCGCA          |
| Marine metagenome<br>1096626843902 | AACY020562586.1 | 34421-34509 | TAGTGTAAGGCAAACCAATCGAAAGATTGGGACGCAAAGCCTCCGGTCTAAGGGTTCGTTTGTTACCTATGATAGCGGGGATACCACA          |
| Marine metagenome<br>1096626844163 | AACY020563665.1 | 59398-59303 | CACCGTATTGGGCAAACCTAATTGAAAAATTAGGACGCAAAGCCTCCGGTCTAAGGTTGTAAAGGATGTTGAACTAAGATAGCGGGGTTGCCTAA   |
| Marine metagenome<br>3599078       | ABMK01018861.1  | 71-131      | AATCGATAAAGGTAAACCTAAGGCAACTTAGGGGCACAAAGCAATGGATCCTTGTTAGGG                                      |
| Marine metagenome<br>4197540       | ABMC01102009.1  | 14-90       | CGTCGATAATGGCAAACCGGCCGTGAGGTCTGGGACGCAAAGCCATGGGTCTGGATCTCAGATCGCCAGGCTACCGAA                    |
| Marine metagenome<br>4211022       | ABMC01017149.1  | 47-131      | CCCAGACAAAGGCAAACCGAACCGAAAGGTCGGGGCGCAAAGCCGCGGGTCCGTGGGTAGCGCGAAGGTGTTACTCGAAGGATAG             |
| Marine metagenome 625093           | AACY021348332.1 | 498-403     | CACCGTATTGGGCAAACCTAATTGAAAAATTAGGACGCAAAGCCTCCGGTCTAAGGTTGTAAAGGATGTTGTAACCTAAGATAGCGGGGTTGCCTCT |

|                                        |                 |           |                                                                                                                                                                            |
|----------------------------------------|-----------------|-----------|----------------------------------------------------------------------------------------------------------------------------------------------------------------------------|
| Marine metagenome<br>ctg_1101667168567 | AACY022761216.1 | 356-262   | CTTTGAAAAAGGCAACCCGGCCGAAAGGCCGGTTACGCAAAGCTACGGAGCTAAGGACTGCAACCCCGACAGTCTACGCTAGCCGAGCTGCCAAA                                                                            |
| Marine metagenome<br>ctg_1101667302988 | AACY022895637.1 | 446-373   | CTGGCGAACGGGCAAACCTCGAGTGATCGGGGGACGCAAAGCTTCGGGTCTCTACTAGACTGCCGAGCTGCCGAC                                                                                                |
| Marine metagenome<br>ctg_1101667373295 | AACY022965944.1 | 914-962   | TAGAGTAAAGGGCAAACCGGTCGAAAGGTCGGGACGCAAAGCCACCGGT                                                                                                                          |
| Marine metagenome<br>ctg_1101668159085 | AACY023351734.1 | 1378-1304 | TACTGAGAACGCCACACCCCGCGTGAGCGGGGGTCGGAAAGCCACGGGCCCCGAGAGGGTAGCCGGGTTGCCAAA                                                                                                |
| Marine metagenome<br>ctg_1101668551357 | AACY023744006.1 | 1400-1547 | CTTTGAAAAAGGCAAACCAAAGGAACTTTGGGACGCAAAACCACCGGTCCTAGCAAAATCGCCCTATCGCATCTAGGTATTTTCTTTTCGATTTTGCCT<br>ACTCCGTCAGCGGAGCTGACGGAGCCTAACGGATAGCGGGGTTGCCAGG                   |
| Marine metagenome<br>ctg_1101668555221 | AACY023747870.1 | 1258-1117 | TCCCGAGAAAGGCAAACCTCCGCCAGCACGAACGGCGGACCCGTCATAAGAGCGCGAAGGTTCGCGGGGACGGTAACGTCAGGGCGCAAAGCCACGG<br>GCTTTAAGAAAGCAATGGGATTCTTTAAGGTAGCCGGGTTGCCGAA                        |
| Marine metagenome<br>ctg_1101668556430 | AACY023749079.1 | 142-247   | GTATCAGGGTGGCGTGCACGGTAACGTGGGGGCGCAAAGCCACGGGTCTTAGCTTCGAGGATCGCCGGGTTGCCGAGCGGTCAAGAAGGATAGCCGG<br>GTTGCCAAG                                                             |
| Marine metagenome<br>ctg_1101668562533 | AACY023755182.1 | 872-707   | AGCCGATAAAGGTAAACTCGGAGAAATCCGAGGACACAAAATCACAGGCCTACGTTGTCCGAAGACCGGGAAGGCCCGTTACGCCGGCCAGGCGCCC<br>CCAAGCCGGCGGGGCAAGATCAGATGAGTTTCGGGGTTTGTAGGATGATATGGCGGCTGGGTTGCCGAA |
| Marine metagenome<br>ctg_1101668564545 | AACY023757194.1 | 143-55    | AGTTGTAAAGGGTAAACCATTGCAAAGAATGGGGCACAAAGCTTTAGAGCCTAACGGTCCGGACGGACTTACGGCTGTGACGTGCCAAA                                                                                  |
| Marine metagenome<br>ctg_1101668569597 | AACY023762246.1 | 300-201   | TGCGCGACTTGGCAAACCCATTGAAAAATGGGGACGCAAAGCCACCGGTCTAAGGGTCCCGCGGCCAGCGTTGCGGACCTAGGATAGCGGGGCTGCC<br>CGA                                                                   |
| Marine metagenome<br>ctg_1101668573352 | AACY023766001.1 | 1556-1454 | CTCCGATAATAGCAAACCATGAGTAATCATGGGGCGCAAAACATCGGGTCCCAATTACTTTTGATAATGCCAAAAGTAGTTGGGGATAGCCGAGTTGCC<br>GAA                                                                 |
| Marine metagenome<br>ctg_1101668584191 | AACY023776840.1 | 1049-1131 | TCGCGAGAAGGGCACACCTACCGCAAGGTAGGGTCGCAAAGCCGCGGATCCGATTCCCGATACCGACAGCCGGGCTGCCGAA                                                                                         |
| Marine metagenome                      | AACY023777537.1 | 1038-1155 | CCCCGATAAGGGCAACTTCCGGCGCAAGCCGAAGACGCAAAGCCATGAGTCCCGGTTTGGGACGCCCGGTACGGACGTGGGCGCTCGAAAAAGC                                                                             |

|                                             |                 |                 |                                                                                                                                                      |
|---------------------------------------------|-----------------|-----------------|------------------------------------------------------------------------------------------------------------------------------------------------------|
| ctg_1101668584888                           |                 |                 | CGGGATCGTCAGGTCGCCGAG                                                                                                                                |
| Marine metagenome<br>ctg_1101668586529      | AACY023779178.1 | 631-716         | AATTGATGAGGGCAAACCTTAGAGTAATCTAGGGACGCAAAGACACAGTCCCGTACCTACCTCGGTACGGGGGGCTGGTCCGCCGAC                                                              |
| Marine metagenome<br>ctg_1101668586988      | AACY023779637.1 | 657-582         | AAGTGATAAAGGCACACCCGAAGCAATTCTGGGGTCGCAAAGTCATGGGTCCTTAGGAGGATCGCCAGACCGCCACT                                                                        |
| Marine metagenome<br>ctg_1101668587231      | AACY023779880.1 | 137-220         | TGACGATAAAGGCAGATTACGCGAAAGCGTAGCGCGCAAACTCAAGAGCCTAAAGCTTAAAGCTATGGCAGTCAGTTACCGAA                                                                  |
| Marine metagenome<br>ctg_1101668588666      | AACY023781315.1 | 624-704         | ACTCGAAAAAGGCAATCCTTGGCATCAAGGGATGCCAAGGAGCGCAAAGCCACGGGCCAGAAAGGCAGCCGGGTTACCGAG                                                                    |
| Marine metagenome<br>ctg_1101668588758      | AACY023781407.1 | 697-610         | AGTCGAAAATGGCAAAACCGGGAAAACCCGGCGCGCAAAGCTACAGAACCTAAGGTCTCAAGAGGACTATGGTAGTCAGTTACCGAA                                                              |
| Marine metagenome<br>ctg_1101668614096      | AACY023806745.1 | 1046-903        | GCCTGAAAAGGGCAAACCTGTTGAAAAACAGGGGCGCAAAGCTACAGACCAGTTAGTTGCTAGATAATAGCTATTGGCTTCTAGTCGTAGATTACTAAC<br>CAAGAGCTGACTGCTAACAACCAAAATGGTAGCTGGGTTGCCAGG |
| Marine metagenome<br>HOTS_Contig12129       | ABEF01012129.1  | 805-713         | TTCCGAAAAAGGCAAACCGTCGGTAACGGCGGGACGCAAAGTTACCGGTCCCAAAGCGATTTTAGACACCTTTGGGACAGCGGGACCGCCGGG                                                        |
|                                             |                 |                 |                                                                                                                                                      |
| Marinobacter adhaerens<br>HP15              | CP001978.1      | 2000844-2000918 | TTTCCCCGCCGCCAAACCTCTCGCGAGAGGGGGACGGAAAGCCACGGATCTCTCTGAGATAGCCGGGTTGCACGG                                                                          |
| Marinobacter sp. ELB17<br>1101232001221     | AAXY01000014.1  | 263-343         | CTAACCAGCAGCCAAACCATTTGTGAGGATGGGACGAAAGCCAAGGATCTCTGGGGAAAAGAGACAGCCTGGTTGCCTAG                                                                     |
| Marinobacter sp. MnI7-9<br>contig00025      | AGTR01000027.1  | 928-1010        | CCGTTCGGGAGCCAAACCAATTCGCGAGGATGGGACGGAAGCCAAGGATCTCTAGAAGAATAAGAGACAGCCTGGTTGCAAAG                                                                  |
|                                             |                 |                 |                                                                                                                                                      |
| Marinobacterium stanieri<br>S30 contig00063 | AFPL01000054.1  | 32927-32851     | CTCCCGAAAAGGCAACTGCCCAAGAGCGGCAGACGCAAAGCCAAGGGCCAATTGGATTGGCTGCCTGGCTACCGAA                                                                         |



|                                                              |                |                 |                                                                                              |
|--------------------------------------------------------------|----------------|-----------------|----------------------------------------------------------------------------------------------|
| Megasphaera elsdenii strain<br>DSM 20460 draft genome        | HE576794.1     | 199821-199748   | CATTAAATTCGGCAAACCCGGGGAAACCCGGCGACGCAAAGCTATAGGGCCTCTGCTGGCAGCCAGTTGCAATC                   |
| Metagenome sequence<br>3634298_fasta.screen.Conti<br>g6294   | AAFY01000350.1 | 1255-1332       | GATACAAATAGCCAAACTTACTGTGAAGTAAGGACGGAAAGCTACGGATCTTGATTAAAGATGGCCGAGTTGCAACT                |
| Metagenome sequence<br>AGZO12498.g2                          | AAFY01007332.1 | 747-673         | ATCCGACAATAGCAAACCCGGAGTAATCCGGGGACGCAAAACCACGGGTCCTATTGGATAGCCGGGTACCGAA                    |
| Metagenome sequence<br>AGZO9529.g2                           | AAFY01019596.1 | 653-567         | CCACGAAAAAGCCAAACCTGTTTAAACGCAGGGACGGAAAGCCACGGGTCTTTTCTACGATACGACCAAGACAGCCGAGCTGCCGAA      |
| Metagenome sequence<br>AGZO9766.g2                           | AAFY01014293.1 | 531-604         | TTTATTAAAGCCAAACCTGTTGTAAGGCAGGGACGGAAAACTACGGGTCATCAAGATAGCCGAGTTGCCAGA                     |
| Methylobacillus flagellatus<br>KT                            | CP000284.1     | 503076-502984   | AAATGTTAAGGGCAACCTTGTTGAAAAACCAAGGACGCAAAGTCACCGGTCTAAGGTAAGCAGCTTGCTACTATGACAGCGGAACCGCCATA |
| Methylobacter<br>tundripaludum SV96<br>Mettuscaffold_1_Cont6 | AEGW02000006.1 | 60848-60922     | AATAAATAAGCTAAACCTATTGAAAGGTAGGGACAGAAAGTTACGGTTCCAAAACGGAAAGCCGGACTGCCGAA                   |
| Methylobacter<br>tundripaludum SV96<br>Mettuscaffold_2_Cont9 | AEGW02000009.1 | 242664-242740   | ACACGATAAAGCCAATCCTGCCGAAAGACAGGAGCAGAAAGTCGCGGATCCTATTAAACGGAAAGCCGGACTGCCGAA               |
| Methylococcobium                                             | FO082060.1     | 3219719-3219804 | ATCATAAAAGGGCAAAACCACCGAAAGGTGGTGACGCAAAGTTTCCAGTCTAACGGAGTTATTCTATGACAGTGGGATTGCTAAA        |

|                                            |                |                 |                                                                                                                                                          |
|--------------------------------------------|----------------|-----------------|----------------------------------------------------------------------------------------------------------------------------------------------------------|
| alcaliphilum str. 20Z<br>chromosome        |                |                 |                                                                                                                                                          |
| Methylomonas methanica<br>MC09             | CP002738.1     | 3052770-3052683 | TTTAACGTTTGCCACTCCCGTTGCGAGGCGGGGCCGAAAGCCACGGTCTTGAGAAACAACAAAAACAAGAAGGCCGGGCTGCCTCC                                                                   |
| Methylomonas methanica<br>MC09             | CP002738.1     | 477526-477609   | GACATCTATCGCCAAACCCGCTGCGAAGTGGGGGCGGAAAGTCTCGGGTCTTGAGATTGTTACAAGACGGCTGGATTGCTCCC                                                                      |
| Methylomonas methanica<br>MC09             | CP002738.1     | 3378100-3378022 | TTGCAACCCCGCCACATCCGCCGCGAGACGGAGCCGGAAAGCCACGGGTCTTGGAAGTAAGACAGCCGGGTACCTTC                                                                            |
| Methylomonas methanica<br>MC09             | CP002738.1     | 990642-990719   | AATAACCATGGCCAAACTCGTCGCGAGGCGGGGGCGGAAAGTCTCGGGTCTTGTTTGAAGACGGCCGGGTGCCAAC                                                                             |
| Methylomonas methanica<br>MC09             | CP002738.1     | 986079-986231   | GCGTGTAAGCCAAACCCGTCGCGAGGCGGGGACGGAAGTCACGGGTCTTGAATGGTTAGTCATGCTCGCTTGGAGTAGCCTGAAATGGGGCTTG<br>CCGCCTACGGGCGGCAATGACAGGGACCGCTGTAAAGACGGCCGGATCGTCACC |
| Methylomonas methanica<br>MC09             | CP002738.1     | 4651110-4651029 | TACCCAATTTGCCACAGCCGTCGTGAGGCGGCGTCGGAAAGCCTAGGGTCTGGTTAGGATGCCAGATAGCCGGGCCGCCTCC                                                                       |
| Methylomonas methanica<br>MC09             | CP002738.1     | 4842565-4842484 | GCATAAATTCGCCATCCCGTCGCAAGGCGGGTTCGGAAAGCCGCGGGTCTGCCGCTCAGCGAGATAGCCGGGCTGCTTTC                                                                         |
|                                            |                |                 |                                                                                                                                                          |
| Methylophaga<br>aminisulfidivorans MP 54_1 | AFIG01000001.1 | 1881455-1881378 | GAACAGTTAAGCCAACCTTGGTGTGAGCCATGTGACGGAAGCCACGGATCTTTTTTAAAGATGGCCGGGTGCATAG                                                                             |
| Methylophaga<br>aminisulfidivorans MP 54_1 | AFIG01000001.1 | 1615961-1616039 | TTTAATCGAAGCCAAACTCGTCGTGAGGCGGGGTCGGAAAGCTACAGGTCTTCCAAGTGAAGATGGCTGGGTGCATTG                                                                           |
| Methylophaga<br>aminisulfidivorans MP 54_1 | AFIG01000001.1 | 1236852-1236771 | TATTTAATCGGCCAAACTTGGTGTGAATCAGGGACGGAAGCCACAGGCCTTGTGTTTAAACAAGGTGGCTGGGTGCACAA                                                                         |
| Methylophaga                               | AFIG01000003.1 | 355044-354968   | TTTAACAAAAGCCAAACTCGTCGTGAGGCGGGGTCGGAAAGCCACAGATCTTTTTTAAAGATGGCTGGGTGCATTG                                                                             |

|                                                   |                |                 |                                                                                                               |
|---------------------------------------------------|----------------|-----------------|---------------------------------------------------------------------------------------------------------------|
| aminisulfidivorans MP 54_3                        |                |                 |                                                                                                               |
| Methylophaga<br>aminisulfidivorans MP 54_3        | AFIG01000003.1 | 123988-124076   | AATTATCGGAGCCAACCTTGGTGCAGCCAAGTACGGAAAGCTACAGATCTCGGCTGATGTACTTAGTTGAGATGGCTGAGTTGCATTT                      |
| Methylophaga<br>aminisulfidivorans MP 54_3        | AFIG01000003.1 | 123622-123540   | TTTTTTTAAAGCCAAACTCGTCGTGAGGCGGGGTCGGAAAGCCACGGGTCTCTGGTTTGATTAGAGATGGCTGGGTTGCATTG                           |
| Methylophaga<br>aminisulfidivorans MP 54_3        | AFIG01000003.1 | 631345-631263   | ACATATTATCGCCAAACCTGATGTGAGTCAGGGACGGAAAACCTACAGCTGTGCATTAGTGGCATCAGGGCTGGGCTGCATGA                           |
| Methylophaga<br>aminisulfidivorans MP 54_3        | AFIG01000003.1 | 355846-355761   | TGTAATTAAAGCCAAACTCGCTGTGAGGCGGGGTCGGAAAGCCACAGATCTTAAATCTACATTTAAAGATGGCTGGGTTGCATTG                         |
| Methylophaga<br>aminisulfidivorans MP 54_3        | AFIG01000003.1 | 233715-233636   | TATCATTATTGCCAAACTCAGCGTGAGCTGAGGACGGAAAGCTACAGACCTTAAGCTCTTAAGGTGGCTGAGTTACATAG                              |
|                                                   |                |                 |                                                                                                               |
| Methylophaga<br>mobilis<br>JLW8                   | CP001672.1     | 134556-134643   | ATTTGAAAAAGGCCAAACTCAGCTGAAAAGCGAGGGCGCAAAATCACCGGTCTAAGGGGCGTAAGTTCTAAGATAGCGGGAGTACCAGA                     |
| Methylophaga<br>versatilis 301                    | CP002056.1     | 2547134-2547237 | ATTAAATAAAGGCCAAATCCAAATGAAAATTGGAGACGCAAAGTTACCGGTCTAAAGAAAGCATATTCAATATGAAATGCTATCAATGGCAGCGGGGCCG<br>CAAAT |
|                                                   |                |                 |                                                                                                               |
| Methyloversatilis universalis<br>FAM5 contig00047 | AFHG01000030.1 | 202545-202633   | GCTGAACCAGGGCAAACCCGTCGAAAGGCGGCGACGCAAAGTTTCCGGTCTAACGGGTGACAACACCCCATGACAGCGGGGCCGCGCT                      |
| Methyloversatilis universalis<br>FAM5 contig00071 | AFHG01000053.1 | 92847-92759     | AGCTGAAAAAGGCCAAACCCGTCGAAAGGCGGGGACGCAAAGTCACCGGTCTAATCCGCGCGTGCGCGGGATGACGGCGGGACCGCCACT                    |
|                                                   |                |                 |                                                                                                               |
| Methylovorus<br>glucosetrophus SIP3-4             | CP001674.1     | 417524-417440   | GTTATTGAAAGGCCAAACCTGCTGAAAGGCAGGGACGCAAAGTTTCCGACCTAAGGGCGCATGCCTAAGGTAGCGGGACTGCCGTT                        |
| Methylovorus                                      | CP001674.1     | 111009-111093   | TGCATGAAAAGGCCAAACCCGTTTGAAAGAACGGAGACGCAAAGCTACCGGTCTAAGGAGCAATCTATGACAGCGGGGCCGCCAAT                        |

|                                                 |                |               |                                                                                           |
|-------------------------------------------------|----------------|---------------|-------------------------------------------------------------------------------------------|
| glucosetrophus SIP3-4                           |                |               |                                                                                           |
| Methylovorus sp. MP688                          | CP002252.1     | 110948-111032 | TGCATGAAAAGGCAAACCCGTTTGAAAGAACGGAGACGCAAAGCTACCGGTCTAAGGAGCAATCTATGACAGCGGGGCCCAAT       |
| Methylovorus sp. MP688                          | CP002252.1     | 419887-419803 | GTTATTGAAAGGCAAACCTGCTGAAAGGCAGGGACGCAAAGTTTCCGACCTAAGGGCATATGCCTACGGTAGCGGGACTGCCGTT     |
|                                                 |                |               |                                                                                           |
| Microbial mat metagenome<br>hsmat03_BHWI2563_y1 | ABPR01002897.1 | 790-715       | TTCCGACAAGGGCAAACCCAGGGTGACTTGGGGACGCAAAGCCACGGGCCAAAAATTTGGCGGCCGGGTTGCCGAG              |
| Microbial mat metagenome<br>hsmat03_BHWI3290_y1 | ABPR01004227.1 | 569-481       | GGTGTAGAAGGGCAAAGCTGCCGAAAGGCTGTGACGCAAAGCCACGGGTCTACCGCTCAACCACGAGCAATGATCGCCGGGCTGCCGAA |
| Microbial mat metagenome<br>hsmat03_BHWI6167_y1 | ABPR01008458.1 | 695-769       | CAATGTAAAAGCCAAACCTGTCGCGAGGCAGAGACGGAAAGCCACGGGTCTTTCAGAGACAGCCGGGTTGCCATT               |
| Microbial mat metagenome<br>hsmat04_BHWN6261_x1 | ABPS01008260.1 | 844-784       | CCTATTGTGAAGTAGGGACGGAAAGCCACGGGTCTCACGGTGAGACCGCCGGGTTGCCTTC                             |
| Microbial mat metagenome<br>hsmat05_BHWO2906_x1 | ABPT01003066.1 | 331-415       | CTATGACAAGGCCGAACCATTCGCAAGTTTGGGGCGGAAAGCTGCGGGTCTTGATGATTTCCGAAAAGACAGCCGGGCCGCCATA     |
| Microbial mat metagenome<br>hsmat05_BHWO3072_x1 | ABPT01003325.1 | 49-123        | CAATGTAAAAGCCAAACCTGTCGCGAGGCAGAGACGGAAAGCCACGGGTCTTTCAGAGACAGCCGGGTTGCCATT               |
| Microbial mat metagenome<br>hsmat05_BHWO4321_y1 | ABPT01005252.1 | 327-402       | TTCCGACAAGGGCAAACCCAGGGTGACTTGGGGACGCAAAGCCACGGGCCAAAAATTTGGCGGCCGGGTTGCCGAG              |
| Microbial mat metagenome<br>hsmat06_BHWP4406_y1 | ABPU01005130.1 | 28-109        | ATCAGCCAACGCCAAACCCGCCGCGAGGCGGGACGGAAAGCCACGGGTCCGAAAAAGGGCGGGGAGCCGGGTTGCCTGA           |
| Microbial mat metagenome<br>hsmat06_BHWP8728_y1 | ABPU01012127.1 | 338-263       | TTCAGCAAAAGCCAAACCTACTGTGAAGTGGGGACGGAAAGCTACGGGTCTTAAGTAAGATAGCCGGGTTACCTCA              |
| Microbial mat metagenome<br>hsmat08_BHWT2991_x1 | ABPW01003212.1 | 199-273       | TCAAGACAAAGCTAAACTTGTGCGAGGCAAGGGCAGAAAGCCACGGGTCTCACTGAGACAGCCGGGCTACCAGG                |
| Microbial mat metagenome                        | ABPW01003599.1 | 136-60        | GAACAACAAGGCCAAACCTGCTGCAAGGCAGGGACGGAAAGCCGCGGGCCCCCTGACTCACTTTTCAGCGCTGCCGCC            |

|                                                 |                |                 |                                                                                                          |
|-------------------------------------------------|----------------|-----------------|----------------------------------------------------------------------------------------------------------|
| hsmat08_BHWT3971_b1                             |                |                 |                                                                                                          |
| Microbial mat metagenome<br>hsmat10_BHWZ1487_x1 | ABPY01000821.1 | 130-210         | CCATGCAAATGGCAAACCGGCCGTAAGGCCGGGACGCAAATCCACGGGTTTCGCCTCAGAGGTGGACAGCCGGGCTGCCTTG                       |
|                                                 |                |                 |                                                                                                          |
| Mine drainage metagenome<br>27894568            | ABLU01025776.1 | 127-41          | GCAAACCTCACCGAAAGGAAGGGACGCAAAGCCACTGGCCTAAATCACAGTGTA AAAAGTTGTGATTATGGTAGCAGGGTTGCCTCT                 |
| Mine drainage metagenome<br>27898624            | ABLU01110618.1 | 90-16           | AGAAGAAAAAGCCAAACCTGCTGAGAAGCACGGGCGGAAAGTCACGGGTCTTCCAAAGATAGCCGAGCTGCCTTT                              |
| Mine drainage metagenome<br>27902334            | ABLU01098556.1 | 31-104          | TTGAGATAAAGCCAACCCTGTTGCAAAGCGGGGACGGAAAGCCACGGGTCTGAATTGATAGCCGGGTGCCTTG                                |
| Mine drainage metagenome<br>27951665            | ABLU01050434.1 | 61-1            | TTGAGATAAAGCCAACCCTGTTGCAAAGCGGGGACGGAAAGCCACGGGTCTGAATTGATAG                                            |
| Mine drainage metagenome<br>28065084            | ABLU01137524.1 | 84-1            | ATCAGAGAAAAGCAAACCTCACCGAAAGGAAGGGACGCAAAGCCACTGGCCTAAATCACAGTGTA AAAAGTTGTGATATGGTAGC                   |
| Mine drainage metagenome<br>28071833            | ABLU01037732.1 | 113-40          | TGCAGGTAAAGCCAAACCCTTCGCGAGGAGGGGACGGAAACTACGGATCTCTCGAGACAGCCGGGTAAACCTTG                               |
|                                                 |                |                 |                                                                                                          |
| Mitsuaria sp. H24L5A                            | CAFG01000465.1 | 3433-3332       | GGCTGACCAGGGCAAACCGGCGGAGCCGGCGACGCAAAGCCTCCGGTCTCGGCGCCGACATCCCAAAGATGTCACGACTCGAGATAGCGGGGTTG<br>CCGTA |
|                                                 |                |                 |                                                                                                          |
| Moorella thermoacetica<br>ATCC 39073            | CP000232.1     | 774359-774445   | TCCCCGAAAGGGCAAACCTGCTGAAAGGCAGGGGCGCAAACTAGAGGGTCTACAGCCTTCACGGGCCATGACAGCCAGTTACCACG                   |
| Moorella thermoacetica<br>ATCC 39073            | CP000232.1     | 1536251-1536164 | ATCAACAAAGGGCAAACCTGTGCAAAGGCAGGGACGCAAAGCCATGGGCCTAAAGCCCGACAAGGGCTATGGTTGCCAGGTTGCCGGT                 |
| Moorella thermoacetica                          | CP000232.1     | 1595675-1595592 | CCTTGTTAAGGGCAAACCTGGTGAAAGCCAGGGGCGCAAAGCCACGGGCCTGCAGACGCAAGTCATGGCCGCCGGGTGCCGGG                      |

|                                                |                |                 |                                                                                                   |
|------------------------------------------------|----------------|-----------------|---------------------------------------------------------------------------------------------------|
| ATCC 39073                                     |                |                 |                                                                                                   |
| Moorella thermoacetica<br>ATCC 39073           | CP000232.1     | 394734-394819   | TAGTGTAAGGCAAACACCTGAAAGGGTGGGACGCAAAGCCATGGGTCTACAGCCGTTACCGGTATGACTGCCAGGCTGCCGCT               |
| Moorella thermoacetica<br>ATCC 39073           | CP000232.1     | 543022-543109   | AACCGCTAAAGGCGAACCTGACCGAAAGGCGGGGCGCAAAGCCACGGGCCTAAAGCCTCAACAGGCCATGGCAGCCGGGTGCCGGA            |
| Moorella thermoacetica<br>ATCC 39073           | CP000232.1     | 805514-805611   | GGGCGTCAAAGGCAAGCTCTCCGAAAGGGATGCGCGCAAAGCCATGGGTCTAAGGCCTGGTAGATACAGACCGGGCTATGGCTGCCAGGCTACCGTA |
| Moorella thermoacetica<br>ATCC 39073           | CP000232.1     | 2598937-2598849 | TGCTCAAAGGGTAAACCATCGAAAGGTGGGGACACAAAGCCATGGGTCTAAGGTCCTTAAAGGGCTATGATCGCCAGGCTGCCGGC            |
|                                                |                |                 |                                                                                                   |
| Moritella sp. PE36<br>1099400000563            | ABCQ01000007.1 | 1346-1265       | GTTGTAAAAAGGCAAACAAATCGTGAGGTTTGGACGCAAAGTTACCAGTCTGTATTTTATTACAGATAGTGGAAACCGCCAAA               |
|                                                |                |                 |                                                                                                   |
| Mosquito metagenome<br>6386792                 | ABNJ01050198.1 | 115-47          | GTTGAAAACCTGGGACGCAAAGCCTCCGGTCTAAGGGTTCGTCTGTACCTATGATAGCGGGGATTCCACA                            |
| Mosquito metagenome<br>6397033                 | ABNJ01021441.1 | 41-121          | GTGTGTAAAGGCAAACCAGTTGAAAACTGGGACGCAAAGCCTCCGGTCTAAGGGTTCGTCTGTACCTATGATAGCGGGG                   |
|                                                |                |                 |                                                                                                   |
| Mouse gut metagenome<br>LEAN2_U_FF-aaa66d09.b1 | AATB01007711.1 | 352-262         | GGAAACTTTTGGCAATTCATTCGAAAGAATGGCCGCGCAAAGTCAGGAGGCTAAAACGCCGTCACGGCGTCATGCTCGTCCGGCTGCCGGA       |
| Mouse gut metagenome<br>LEAN3_U_BK-aaa60d10.b1 | AATC01005788.1 | 229-145         | TTTTGTAAAGGCAAAATAAATGAAAATTTATGACGCAAAGCCAAGGTCTAAGAGCTATATGCTTATGATAGCTAGGTTGCACAA              |
|                                                |                |                 |                                                                                                   |
| Myxococcus fulvus HW-1                         | CP002830.1     | 7444138-7444058 | CCTGTTCAAGGGCAATCCCGGGCGAAAGCCCGGGTGCAGCAAAGCCGCGGGGCCTGAAGTCCGGCCGGCCGTGACCGCCGTG                |

|                                               |            |                 |                                                                                                               |
|-----------------------------------------------|------------|-----------------|---------------------------------------------------------------------------------------------------------------|
| Natranaerobius<br>thermophilus<br>JW/NM-WN-LF | CP001034.1 | 2311743-2311659 | TCTTGATAAAGGCAAACCTATCGCGAGGTGGGGGCGCAAAGCCACGAGTCTTTACGATTATTATAAAGACAGTCGGGCTGCCAAG                         |
| Natranaerobius<br>thermophilus<br>JW/NM-WN-LF | CP001034.1 | 2319081-2318999 | CCTTGACAAGGGCAAACCTATCGTGAGGTAGGGGCGCAAAGCTACGAGTCTTTACAGTTTGTAAGACAGTCGGGCCGCCAAG                            |
| Natranaerobius<br>thermophilus<br>JW/NM-WN-LF | CP001034.1 | 2633390-2633298 | TCTTGAAAATGGCAAACCTGCCGTGAGGTGGGGGCGCAAAGCCACGAGTCTTTTGTGACAAAACGTCAATAAAAGACAGTCGGGTTGCCAAG                  |
| Natranaerobius<br>thermophilus<br>JW/NM-WN-LF | CP001034.1 | 2260763-2260660 | TTGTTATCGGGGCAAACCTAATGAAAAGTTAGGGACGCAAAGCCATGGGTCTAAGGCACTTTATTGTATATATAATTAAATTGCTAGGACTGCCAGGCTGCC<br>GCA |
| Nitrati fractor<br>salsuginis<br>DSM 16511    | CP002452.1 | 740503-740601   | ACTAGAAAATGCCACCCTGTGCGAGGCAGGTTCCGAAAGCCATGGGTCTTTGATACTGTCACTTGGCAGTAAATGAGAAGATCGCCAGGTTGCCTAA             |
| Nitrati fractor<br>salsuginis<br>DSM 16511    | CP002452.1 | 1496875-1496792 | CGATGTTAAGGCCAAACCCGCCGTGAGACGGGGACGGAAAGCCATGGGTCTAAGGAGAGTGTCTTAGATCGCCAGGTTGCCAGA                          |
| Nitrosococcus<br>halophilus<br>Nc4            | CP001798.1 | 3391739-3391824 | AACCGAAAAAGGCAAACCTATCCGAAAGGATGGGACGCAAAGCCTCTGGCCTAAGTCCTTTAAGGATAAGGTAGCAAGGCTACCGTA                       |
| Nitrosococcus<br>watsoni<br>C-113             | CP002086.1 | 3042769-3042683 | TTATTTAAAGCTAAACCGACCGCAAGGTTGGGGCAGAAAGTCACGGGTCCTTATTTCCATGAGAAGCGGATAGCCGGACTGTCCGA                        |
| Nitrosococcus<br>watsoni<br>C-113             | CP002086.1 | 3036682-3036607 | TATTCATAAAGCTAAACAGCTGAGAGGCTGGGGCGGAAAGTTACGGGTCCGTTAACGGAGAGCCGAGCTACCGAG                                   |

|                                            |                |                 |                                                                                               |
|--------------------------------------------|----------------|-----------------|-----------------------------------------------------------------------------------------------|
| Nitrosomonas europaea<br>ATCC 19718        | AL954747.1     | 1707540-1707622 | AACCGACAAAGGCTAATCTGTCGTAAGGCAGGGGCGCAAAGTTCCGGTCCTGATCCATGATCAGGAAAGCGGGACTGCCGAA            |
| Nitrosomonas eutropha C91                  | CP000450.1     | 861386-861306   | AACCGACAAAGGCCAACCTGTCGTGAGGCAGGGGCGCAAAGTTCCGATCCTGATTGCATCAGGAAAGCGGGACTGCCGAA              |
| Nitrosomonas sp. AL212                     | CP002552.1     | 1184435-1184356 | ATTTGATATTGCCACTCTTGTCGCGAGGCAAGTTCGGAAAGCCTACGGATCTCCGAAACGAGACGGCTGGGTTCCTCT                |
| Nitrosomonas sp. AL212                     | CP002552.1     | 2586175-2586089 | CTATGAAAAAGGCAAACTCTGCGAAAGCGGGGACGCAAAGTCACTGATCTAAAGGGCAAATGCCCCAGGATGGCAGGACTGCCAGG        |
| Nitrosomonas sp. AL212                     | CP002552.1     | 2586415-2586329 | AGATGAAAAAGGCAAACCTGCGAAAGCAGGGGACGCAAAGTCACTGATCTAAAGGGTAAATACCCCAGGATGGCAGGGCCGCCAGA        |
| Nitrosomonas sp. AL212                     | CP002552.1     | 2587963-2587877 | AAC TTGAAAAAGGCAAACTTTGCGAAAGCAGAGGGGCGCAAAGTCACTGATCTAAAGGGAAAGCTCCCAATGATAGCAGGACTGCCAGG    |
| Nitrosomonas sp. Is79A3                    | CP002876.1     | 1763093-1763171 | CAAAGTTAATGCCACCTTACTGCAAAGTAAGTCCGGAAAGCCAACGGATCTCTTCATTGAGATGGCCGGGTTCCTCT                 |
| Nitrosomonas sp. Is79A3                    | CP002876.1     | 1942496-1942582 | ATTTGAAAAAGGCAAACTCTGCGAAAGCAGGGGACGCAAAGTCACTGATCTAAAGGGCAAATACCCCACGATGGCAGGACTGCCATG       |
|                                            |                |                 |                                                                                               |
| Nitrosospira multiformis<br>ATCC 25196     | CP000103.1     | 3131016-3131108 | TACCGTAAAAGCCACACCCGTCGCGAGGCGGGGCCGAAAGTCCCGGATTTGCGCAATTGAAGGGAAGTTCGCGCAGGTAGCCGGACTGCCAGT |
| Nitrosospira multiformis<br>ATCC 25196     | CP000103.1     | 2175552-2175465 | ATCTGTAAAAGGCAAATCTCGCGAAAGCGGGGACGCAAAGTCACTGGTCTACCGGGCTCAAGGCCCCAGGACGGCAGGACTGCCAGA       |
| Nitrosospira multiformis<br>ATCC 25196     | CP000103.1     | 2965168-2965087 | CAGGAACAAAGCCAAACCCGTTGCGAAGCGGGGACGCAAAGCTGCGGGTCTCCAAGCAAGCGGAGGTAGCCGGGTGCTCCA             |
|                                            |                |                 |                                                                                               |
| Oceanobacillus iheyensis<br>HTE831 DNA     | BA000028.3     | 2580327-2580243 | CTCAGAAAAAGGCAAACCTATTGAAAGATGGGGACGCAAAGTCACAGATCTAAGGTATTTTACTAAGATGGCTGGACTATCTGG          |
|                                            |                |                 |                                                                                               |
| Oceanospirillum sp. MED92<br>1099521380308 | AAOW01000025.1 | 38985-39059     | TCTCGATAATGGCAAACCAGAAGCGATTCTGGGGCGCAAAGTCACAGGTCCCTTGTGGATGGCTGGGCTACCGAA                   |
| Oceanospirillum sp. MED92<br>1099521380376 | AAOW01000010.1 | 54987-54913     | CTCTCGAAAAGGCAAAACCCGAGTAATCGGGTGACGCAAAGTCACGGGTCCCAATGGGACAGCCGGACCGCCACA                   |



|                                                                                        |                |               |                                                                                                           |
|----------------------------------------------------------------------------------------|----------------|---------------|-----------------------------------------------------------------------------------------------------------|
| Oceanospirillum sp. MED92<br>1099521380380                                             | AAOW01000017.1 | 31244-31159   | AACCCTAATGGCCAAACCTGCCGTGAGACAGGGACGGAAAGCTACAGGTCTATGTTTGTATGTCATTAGATGGCTGAGCTGCGCAG                    |
|                                                                                        |                |               |                                                                                                           |
| Olsenella sp. oral taxon 809<br>str. F0356 cont1.8                                     | ACVE01000008.1 | 68265-68366   | AATTAAACTTGGCAAACCTGCCGAAAGGCAGCGACGCAAAGCTATAGGGCCTTAACTGGTAACCAGCTGCATTCTCCGAAGGGGGGCAGCCGGCTGT<br>TTTT |
| Olsenella uli DSM 7084                                                                 | CP002106.1     | 604544-604621 | AATATGTCCTGGCAAACCCATCGAAAGGTGGGGACGCAAAGCTATAGGGCCTTGTGCGCATGGCAGCCAGCTGCGGTT                            |
| Olsenella uli DSM 7084                                                                 | CP002106.1     | 789919-789992 | ATTTCAGCTAAGTAAAACTGTCGAAAGGCAGTGACGTAAAGCTATAGGGCCTGGAATGGCAGCCAGCTGCAATT                                |
|                                                                                        |                |               |                                                                                                           |
| Oribacterium sinus F0268<br>contig00315                                                | ACKX01000177.1 | 5327-5252     | GTAGGACATCGGCAAACCCGGGGAAATCCGGCGACGCAAAGCTATAGGGACTGTAAAATGTCAGCCAGCTGCAATC                              |
| Oribacterium sinus F0268<br>contig00316                                                | ACKX01000178.1 | 159-84        | GATCTGTTTGAGCAAAATCGGGGAAACCCGGTGACGCAAAGCTATAGGGCCTGTAATATGGCAGCCAGTTGCGATC                              |
| Oribacterium sp. oral taxon<br>108 str. F0425<br>noncontiguous_finished_chr<br>omosome | AFIH01000001.1 | 637037-637112 | GATCTGTTTGAGCAAAATCGGGGAAACCCGATGACGCAAAGCTATAGGGCCTGTAAATGGCAGCCAGTTGCGATC                               |
| Oribacterium sp. oral taxon<br>108 str. F0425<br>noncontiguous_finished_chr<br>omosome | AFIH01000001.1 | 637271-637346 | GTTGGACATCGGCAAACCCGGGGAAATCCGGCGACGCAAAGCTATAGGGACTGTAAAATGTCAGCCAGCTGCAATC                              |
|                                                                                        |                |               |                                                                                                           |
| Ornithinibacillus sp. TW25<br>contig00027                                              | AEWH01000012.1 | 10584-10499   | TTACGAAAAAGGCAAACTTATCGAAAGGTAAGGACGCAAAGCCAAAGGGCCTAATACATCACTGTAATGGCAGCCTAGCTACCGAA                    |
| Ornithinibacillus sp. TW25<br>contig00072                                              | AEWH01000024.1 | 131228-131315 | TAATGAAAAAGGCAAACTATTTCGAAAGGGTAGGACGCAAAGCTTAGGGTCTAATGGCACACAAAGCCAACGATCGCCTGGCTACCAAA                 |

|                                                 |                |                 |                                                                                                 |
|-------------------------------------------------|----------------|-----------------|-------------------------------------------------------------------------------------------------|
| Ornithinibacillus sp. TW25<br>contig00116       | AEWH01000060.1 | 92407-92325     | TCTATTAAAAGGCAAACCCATTGTGAAGTGGGGACGCAAAGTCACAGATCCAAGCTTTTGGCTAGGATGGCTGGATTACATAG             |
| Ornithinibacillus sp. TW25<br>contig00190       | AEWH01000074.1 | 6929-6845       | TTTGATAAAGGCAAACCTATCTGAAAGGGTAGGACGCAAAGCTAAGGGTCTAAGGTTGAAAACTATGATCGCTGGTTGCCAAG             |
|                                                 |                |                 |                                                                                                 |
| Oscillibacter valericigenes<br>Sjm18-20 DNA     | AP012044.1     | 2922659-2922578 | TAAATCATTGGCAAAACCGTCGAAAGACGGCGTCGCAATGTTAAAGGGCCTGTACCGTTTGGATGGCAGCCAGTTGCCGAA               |
| Oscillibacter valericigenes<br>Sjm18-20 DNA     | AP012044.1     | 780090-780177   | TAAAAAATGGGCGAACTTACTGAAAGATAAGGGCGCAAAGCTAAAGGGCCTAAAGTGCAAGCGCATGACGCCATATAGGATTGCGTA         |
| Oscillibacter valericigenes<br>Sjm18-20 DNA     | AP012044.1     | 81299-81385     | CTCCGATACGAGCAAACCTTGGCGAAAGTCCAGGACGCAAAGCCACGGGTCTAAGGCATTGTTATGCTATGACAGCCGGGCTGCCGAA        |
| Oscillibacter valericigenes<br>Sjm18-20 DNA     | AP012044.1     | 1215747-1215829 | ATCTTGAAGGGGCAAACCGCCTGAAAAGACGGGACGCAAAGCCAGGGGGCTAAGGCGAAAGCTATGCCAGCCCGGCTGCCACG             |
| Oscillibacter valericigenes<br>Sjm18-20 DNA     | AP012044.1     | 4000699-4000608 | AAATGTTAAGAGCAAACCTGCCCCAAAGGCAGGGACGCAAAGCCATAGGATCTAAGGTGCTGATGTAAGCGCTACGACAGCCTGGCTGCCAAT   |
| Oscillibacter valericigenes<br>Sjm18-20 DNA     | AP012044.1     | 3430294-3430206 | TAAAGCCAAGGGCAAACCCGGTGAAAACCGGGGCCCAAAGCCGCAGGGTCTAAGGTGCTGAATGCGCTATGATAGTCTGGCTGCAAAA        |
|                                                 |                |                 |                                                                                                 |
| Oxalobacteraceae bacterium<br>IMCC9480 ctg_1037 | AEPR01000467.1 | 1255-1332       | CAGTTACCCCCGCAAACCTGGAGCGATCCAGCGACGCAAAGCTACAGGGACTTCCCCGAAGTCAGCCAGCTACCTGA                   |
| Oxalobacteraceae bacterium<br>IMCC9480 ctg_4647 | AEPR01000974.1 | 220-306         | ATTGCGGCTGGGCAAACCTTACTGAAAAGTAAGGACGCAAAGCCTCCGGCCTACGGTCTTCACGGATCACGGTAGCGGGGTTGCCAGC        |
|                                                 |                |                 |                                                                                                 |
| Paenibacillus<br>curdlanolyticus YK9 ctg105     | AEDD01000006.1 | 3984-3890       | GAACGATAATGGCAAACCTTGCTGAAAAGCAAGGACGCAAAGCCATAGGGCCTAATCGCCGCCGTAGACGGGGCATTGGCAGCCTGGTTACCGAA |

|                                             |                |               |                                                                                                 |
|---------------------------------------------|----------------|---------------|-------------------------------------------------------------------------------------------------|
| Paenibacillus<br>curdlanolyticus YK9 ctg106 | AEDD01000012.1 | 51621-51535   | TTAAATACTTGGCAAAGCTATAGAAATATAGTGACGCAAAGCTATGGGTCTTCGCACATTTTAGTGAAAGATCGCCAGGTTGCCCAT         |
| Paenibacillus<br>curdlanolyticus YK9 ctg106 | AEDD01000012.1 | 237420-237345 | GACCGATAATGGCAAACCTCGTCGCGAGGCGAGGACGCAAAGTCATGGGTCCCTAGATGGATCGCCAGACTGCCGAA                   |
| Paenibacillus elgii B69<br>Contig1          | AFHW01000001.1 | 90436-90349   | CACTGATAAAGGCAAACCTGTTGAAAAGCGGGGACGCAAAGCTCCGGGTCTAAGGCATAAGTTATGCGATGACGGCCGAGCCGCCAAA        |
| Paenibacillus elgii B69<br>Contig138        | AFHW01000138.1 | 4918-4830     | ATTCGTTCATGGCAAACCTGCCGAAAGGCAGCGACGCAAAGCTTAGGGTCTAAGGTCCGCAAACGGACTACGACAGCCTGGCCGCCGAA       |
| Paenibacillus elgii B69<br>Contig28         | AFHW01000028.1 | 124886-124969 | TCACAGACATGGCAAACCTTGGCGAAAGTCAAGGACGCAAAGCTATAGGGACTAAGGTGTATCACGATGTCAGCCAGCTGCCGAA           |
| Paenibacillus elgii B69<br>Contig3          | AFHW01000003.1 | 20681-20591   | GCTCGATAAAGGCAAACCGGGCGAAAGCTCGCAGGCGCAAAGCGATAGGGATAATGCGCCGAGGTTGCGTGATGCCAGCCAGTTTACCGAA     |
| Paenibacillus elgii B69<br>Contig31         | AFHW01000031.1 | 107104-107011 | ACATGAAAAAGGCAAACCTATTTGAAAGAATAGGACGCAAACTAGAGGGGCTAAGGCTGCTATCCTATAGCGGCTATGCCAGCCAGCTACCTGT  |
| Paenibacillus elgii B69<br>Contig8          | AFHW01000008.1 | 14783-14692   | TGAGTAAAAAGGCACACCTGTCTGAAAAGCGGGGACGCAAAGCCATGGGTCTGCCCTTCCCGAACGGGAAGAACGATGCCAGGTTGCCACT     |
| Paenibacillus elgii B69<br>Contig94         | AFHW01000094.1 | 37876-37966   | AACCGATAAAGGCAAACCTAACGAAAGTTGGGGACGCAAAGCTACAGGGCCTTCCTTAGTTTAGTAACTAAGATGGCAGCCAGTTACCGAA     |
| Paenibacillus lactis 154<br>ctg186          | AGIP01000013.1 | 159170-159257 | CTACGATAACGGCAAACCTTGTGCGAAAGATAAGGACGCAAAGCCACAGGGCCTTCTTGATGAACCGTCAATGGCAGCCTGGCTACCGAA      |
| Paenibacillus lactis 154<br>ctg186          | AGIP01000013.1 | 123475-123569 | GTACGACAATAGCAAACCCACCGAAAGGTGGCGACGCAAAGCTATAGGGGCTAATGCGGGACCTACTGCAACCGCAATGCCAGCCAGTTGCCGAA |
| Paenibacillus lactis 154<br>ctg186          | AGIP01000013.1 | 159021-159107 | CACGATAAATGGCAAACCTTGTGCGAAAGGCAAGGACGCAAAGCTATAGGGCCTTCTTGATGAACCATCAATGGCAGCCAGCTACCGAA       |
| Paenibacillus lactis 154                    | AGIP01000003.1 | 298175-298081 | GTACGATAATCGCAAACCCACTGAAAAGTGCGACGCAAAGCTATAGGGGCTAATGGGGTTCTGCATAGAACC GCGATGCCAGCCAGTTGCCGAA |

|                                             |                |                 |                                                                                                     |
|---------------------------------------------|----------------|-----------------|-----------------------------------------------------------------------------------------------------|
| ctg196                                      |                |                 |                                                                                                     |
| Paenibacillus lactis 154<br>ctg196          | AGIP01000003.1 | 297812-297718   | GTACGATAATAGCAAACCCACTGAAAAGTGGCGACGCAAAGCTATAGGGGCTAATGCGAATCTGCTAAGATACGTGATGCCAGCCAGTTGCCGAA     |
| Paenibacillus mucilaginosus<br>KNP414       | CP002869.1     | 8527198-8527102 | TAGTGA AAAAGGGCAAACG CAGGAACTGCGTGACGCAAAGCCACAGGGCCTGAACCCTCAAGAGATTCTCTTGATGGAAGGCAGCCGGTTGCCACA  |
| Paenibacillus mucilaginosus<br>KNP414       | CP002869.1     | 2325919-2325827 | CTTGTTCAATAGCAAACCTTATTGAAAAATAAGGACGCAAAGCCTCGGGCCTAAGGAATGAACCTTCTCATTCTATGGCAGCCGGGCTGCCTTA      |
| Paenibacillus mucilaginosus<br>KNP414       | CP002869.1     | 3205243-3205331 | TCTCGATAAAGGCAAACCTGGTGAAAACCAGCGACGCAAAGCTACAGGGGCTACAGCGACAAGGTGCGCTATGCCAGCCAGCTACCGAA           |
| Paenibacillus mucilaginosus<br>KNP414       | CP002869.1     | 8482134-8482045 | CACACGTCAGGGCTAACTTGATGAAAGTCAGGGGCGCAAAGTCACGGGCCTGTAATCCGTTCCGCGGATTATGGCAGCCGGGCTGCATTC          |
| Paenibacillus mucilaginosus<br>KNP414       | CP002869.1     | 980457-980542   | ATCCGACAAAGGCAAACCTGGTGAAAGCCAGTGACGCAAAGCTACAGGGGCTACAGTCTTTAGGACCATGCCAGCCAGTTGCCGGT              |
| Paenibacillus mucilaginosus<br>KNP414       | CP002869.1     | 30540-30627     | TTCGTTTCATGGCAAACCTGCCGAAAGGCAGGGACGCAAAGCTTAGGGTCTACGGTCTGCAGGGACTATGACAGCCTGGCCGCCGAA             |
| Paenibacillus mucilaginosus<br>KNP414       | CP002869.1     | 2865292-2865388 | TTACGATAAAGGCAAACCTCATCGAAAGGTGGGGACGCAAAGCCACAGATCTAAAGCCTTCAGTCCCGCTGACAGGCAATGACCGCTGGGTTACCGAA  |
| Paenibacillus mucilaginosus<br>KNP414       | CP002869.1     | 6097648-6097735 | TTCCGACAAAGGCAAACCTCCTCTAAAGGGGAGGACGCAAAGCCACGGGCCTACCGAACATCCTGTTCCACGGCTGCCGGGCTGCCGTT           |
| Paenibacillus mucilaginosus<br>KNP414       | CP002869.1     | 8482460-8482363 | ACGCGAGATTGGCAAACCTTAAATGAAAATCAAGGGCGAAAAGTCATGGTCCTAAAGTCTTAACCACTTACATAAGATCATGGCAGCCGGGCTGCATTC |
| Paenibacillus mucilaginosus<br>KNP414       | CP002869.1     | 7702453-7702369 | GATCGAAAAAGGCAAACCATGCGAAAGCATGGGACGCAAAGCCACGGGTCTACAGCGTTATGCGCATGACAGCCGGGCTGCTGCA               |
| Paenibacillus polymyxa<br>ATCC 842 contig16 | AFOX01000016.1 | 286231-286312   | CAACGATAAACGCAGCCCTGTCGAAAGGCAGGTACGCAAAGCTAAAGGGCCTTCCCGTAAGGATGGCAGCCTGGCTACCGAA                  |

|                                                |                |                 |                                                                                                |
|------------------------------------------------|----------------|-----------------|------------------------------------------------------------------------------------------------|
| Paenibacillus polymyxa<br>ATCC 842 contig7     | AFOX01000007.1 | 174-94          | TCAAGCTAATGGCAAAGCTGTCGAAAGACAGTGACGCAAACTATAGGGCCTTCCTACTCGGATGGCAGCCAGTTACCAAG               |
| Paenibacillus polymyxa<br>E681                 | CP000154.1     | 1235056-1235136 | CAACGATAAACGCAGCCCTGTCGAAAGGCAGGTACGCAAAGCTAAAGGGCCTTCCACAAGGATGGCAGCCTGGCTACCGAA              |
| Paenibacillus polymyxa<br>E681                 | CP000154.1     | 444495-444415   | TCAAGTTAATGGCAAACTGTCGAAAGGCAGTGACGCAAACTATAGGGCCTTCCTATCCGGATGGCAGCCAGCTACCAGA                |
| Paenibacillus polymyxa M1<br>main chromosome   | HE577054.1     | 506219-506141   | CAGGATAAATGGCAAACCTGTCGAAAGGCAAGGACGCAAAGCTACAGGGCCTTCTGTATGATGGCAGCCAGCTACCGGT                |
| Paenibacillus polymyxa M1<br>main chromosome   | HE577054.1     | 506100-506019   | TATACGAAATGGCAAACCTGTCGAAAGGCAGGGACGCAAAGCTATAGGGCCTTCTATTGATGATGGCAGCCTGGCCACCGAA             |
| Paenibacillus polymyxa M1<br>main chromosome   | HE577054.1     | 1357088-1357169 | CAACGATAAACGCAGCCCTGTCGAAAGACTGGTACGCAAAGCTAAAGGGCCTTCCCGTAAGGATGGCAGCCTGGCTACCGAA             |
| Paenibacillus polymyxa SC2                     | CP002213.1     | 1358460-1358541 | CAACGATAAACGCAGCCCTGTCGAAAGACTGGTACGCAAAGCTAAAGGGCCTTCCCGTAAGGATGGCAGCCTGGCTACCGAA             |
| Paenibacillus polymyxa SC2                     | CP002213.1     | 507707-507626   | TATACGAAATGGCAAACCTGTCGAAAGGCAGGGACGCAAAGCTATAGGGCCTTCTATTGATGATGGCAGCCTGGCCACCGAA             |
| Paenibacillus polymyxa SC2                     | CP002213.1     | 507826-507748   | CAGGATAAATGGCAAACCTGTCGAAAGGCAAGGACGCAAAGCTACAGGGCCTTCTGTATGATGGCAGCCAGCTACCGGT                |
| Paenibacillus riograndensis<br>SBR5 Contig153g | AGBD01000202.1 | 1315-1235       | CTACGACAAAGGCAAACCTAATCGAAAGATAGGGACGCAAAGCTATAGGGCCTCCGAAAGAGTGGCAGCCTGGCTACCGAA              |
| Paenibacillus riograndensis<br>SBR5 Contig207a | AGBD01000315.1 | 3941-3848       | TCCAGTAAAGGGTAAACCTGCCGAAAGGCAGGGACACAAAGTCTCGGGTCTACTGTAGAGATGCTGGAGCTACTACGACGGCCGGACTGCCTGG |
| Paenibacillus riograndensis<br>SBR5 Contig341c | AGBD01000709.1 | 7511-7420       | ATTTTCATAACGGCAAACCTATCTGAAAGGATAGGACGCAAAGCAATGGGCCTAAAGATGCAAACATCGCATCCATGGCTGCCAGGCTGCCAAG |
| Paenibacillus riograndensis<br>SBR5 Contig407a | AGBD01000972.1 | 9517-9608       | TATTCCTAAAGGCAAACCTGTCCGAAAGGGCAGGACGCAAAGCCATGGGCCTAAGAGCGCAATTGCTGCATTATATGGCCGCCAGGCTGCCAAT |
| Paenibacillus riograndensis<br>SBR5 Contig430c | AGBD01001042.1 | 575-667         | TTGGAACAAGGGCAAATCCGTACGAAAGTCGGAGACGCAAAGCCACGGGCCTACTTCATCCGGGAGGGATGTCAGGGCAGCCGGGCCGCTCAA  |

|                                                        |                |                 |                                                                                            |
|--------------------------------------------------------|----------------|-----------------|--------------------------------------------------------------------------------------------|
| Paenibacillus riograndensis<br>SBR5 Contig498          | AGBD01001299.1 | 1042-955        | CATGTATAAACGCAAACCGTCTGAAAGGACGGGACGCAAAGTCAGGAATCTAATGCCCCACCAGGGCTATGATCGTCCGGCCGCCGTG   |
| Paenibacillus riograndensis<br>SBR5 Contig510e         | AGBD01001363.1 | 10160-10241     | ATACGATAACGGCAAACCTATCGAAAGGTAGGGACGCAAAGCTAAAGGGCCTTCCCAATACGAATGGCAGCCAGCTACCGAA         |
| Paenibacillus riograndensis<br>SBR5 Contig510e         | AGBD01001363.1 | 10004-10085     | GCACGACAACGGCAAACCTATCGAAAGGTAGGGACGCAAAGCTAAAGGGCCTTCCCGCTATGGATGGCAGCCAGCTACCGAA         |
| Paenibacillus sp. HGF7<br>contig00172                  | AFDH01000004.1 | 14990-15071     | ACTCGATAAAGGCAAACCTATCGCGAAAGCATAGGACGCAAAGCCACGGGTCTAAAGCGCAGCTAGACAGCCGGGTTACCGAA        |
| Paenibacillus sp. JDR-2                                | CP001656.1     | 4481333-4481246 | AACTGAAAAAGGCAAACCTTGCCGAAAGGCAAGGACGCAAAGTTATGGGCCTAATGCTGCATAGAAGCGATGGCTGCCAGACCGCCGGA  |
| Paenibacillus sp. oral taxon<br>786 str. D14 cont1.121 | ACIH01000121.1 | 24181-24265     | ACCAGATAAGGGTAAACCTGTTGAAAAGCAGGGGCACAAAGTCTCAGATCTAAGGTAGGAATACTAAGATGGCTGGACTGCCTGG      |
| Paenibacillus sp. oral taxon<br>786 str. D14 cont1.121 | ACIH01000121.1 | 49416-49501     | AAGGAAAAATGGCAAACCCGCTCGAAAGACGGGGACGCAAAGCCACGGGTCTGCGGCCGTAAGGCTATGATCGCCGGGTTACCCTA     |
| Paenibacillus terrae<br>HPL-003                        | CP003107.1     | 3006386-3006466 | CCACGATAAACGCAGCCCTGTTGAAAGGCAGGTACGCAAAGCTAAAGGGCCTTCCGTGAGGATGGCAGCCTGGCTACCGAA          |
| Paenibacillus terrae<br>HPL-003                        | CP003107.1     | 2098534-2098453 | ATACGATAATAGCAAACCTGTCGAAAGGCAGGGACGCAAAGCTATAGGGCCTTCTTTTAAAGATGGCAGCCTGGCCGCCGAA         |
| Paenibacillus terrae<br>HPL-003                        | CP003107.1     | 2098656-2098576 | CAGGATAAATGGCAAACCTGTCGAAAGGCGGGGACGCAAAGCTACAGGGCCTTCTTTTAAAGATGGCAGCCAGCTACCGGT          |
| Paenibacillus terrae<br>HPL-003                        | CP003107.1     | 4653410-4653325 | ACCAGTAAAGGGTAAACCTGCCCCAAAAGCAGGGGCACAAAGTCCCAGATCTAAGGTAGAGATACTAGGATGGCTGGTCTGCCCCG     |
| Paenibacillus terrae<br>HPL-003                        | CP003107.1     | 4365885-4365974 | TCCCGTTAATCGTAAACACCTCGAAAGTGGTGGACACAAAGCCATGGGTCTAAAGCTGGATTAAACAGCCATGATTGCCAGGTTGCCGAA |
|                                                        |                |                 |                                                                                            |
| Pelobacter carbinolicus                                | CP000142.2     | 2400104-2400022 | CTCCGATAAGAGCACAGCCAGATTCTTCTGGTGTGCGAAAGTCACGGGTTCGCTTTTAAAGAGCGGATGGCCGGTCTGCCGAA        |

|                                     |            |                 |                                                                                           |
|-------------------------------------|------------|-----------------|-------------------------------------------------------------------------------------------|
| DSM 2380                            |            |                 |                                                                                           |
| Pelobacter carbinolicus<br>DSM 2380 | CP000142.2 | 2380546-2380623 | TTCCGACAATGGCAAAATCGGGGTGACCCGATGACGCAAAGCCACGGGTCCCATTGCAAGGACAGCCGGGTATCGAA             |
| Pelobacter carbinolicus<br>DSM 2380 | CP000142.2 | 1141626-1141702 | TTTAACATAGGGCAAACTGGAGTAATCCAGTGACGCAAAGCCACGGGTCTTGCCGAGGATAGCCGGGTGCTGAA                |
| Pelobacter carbinolicus<br>DSM 2380 | CP000142.2 | 1141853-1141929 | AGGATATATCGGCAAAAGCCGGAGTAATCCGGTGACGCAAAGCCACGGGTCTCATTGAGGATAGCCGGGTGCTGAA              |
| Pelobacter carbinolicus<br>DSM 2380 | CP000142.2 | 1987037-1987116 | TCCCGATAAAACCAAACCTGTCGCAAGACAGGGACGGAAAGCAACGGATCTTCGAACCAGAAGATGGCCGAGCTGCCGAA          |
| Pelobacter carbinolicus<br>DSM 2380 | CP000142.2 | 1774619-1774697 | TTTCGTTCAAGGCAAAGTCAGAGTAATCTGGCCACGCAAACCCACGGGTCCATGGTTCATGGATAGCCGGGTGCCGAA            |
| Pelobacter carbinolicus<br>DSM 2380 | CP000142.2 | 2399816-2399735 | TTCCGATAAGGGCAAACTGGAGTAATCCAGTGACGCAAAGCTGCGGGTGCGTGGGAAACCACGGATAGCCGGGTACCGAA          |
| Pelobacter carbinolicus<br>DSM 2380 | CP000142.2 | 668521-668443   | TTCCGAAAATAGCAAACCTCGGGGTAACTCGGGGACGCAAAGCCATGGACCCGTTGCAGGGGGCCGCCAGGCTACCGAA           |
| Pelobacter carbinolicus<br>DSM 2380 | CP000142.2 | 2648195-2648117 | CCGACGAAAAGGTAAACCCGGGCAACCGGGGGCGCAAAGCCGCTCATCCGGATCTTCCGAAAGGAGGGCTGTCGAA              |
| Pelobacter propionicus DSM<br>2379  | CP000482.1 | 3117927-3118003 | AGACGACAATACTAAACCATTCGCGAGAATGGGACGAAAGCCTACAGGGTCTACCGAGACAGCCGGGTGCGCGAA               |
| Pelobacter propionicus DSM<br>2379  | CP000482.1 | 3118185-3118275 | GCCTGAAAAAGGCAAACCATTCGAAAGGATGGGGCGCAAACCACTGGTCTAAATCCCGAAATTCGGGACATGACAGCAGGGCTGCCGGG |
| Pelobacter propionicus DSM<br>2379  | CP000482.1 | 1047089-1047165 | TCACCGATAGGGCACAGCAGGGGCAACCCTGTGTCGCAAAGCTACCATCCTCGGGAGGGGATAGAGGGTTGTCGAA              |
| Pelobacter propionicus DSM<br>2379  | CP000482.1 | 2712839-2712914 | ACACGACACTACTCAACCATCCGCGAGGATGGGGCGGAAAGCCTCAGGATCTCCAGAAGACAGCCGGGTGCCGAA               |

|                                    |            |                 |                                                                                         |
|------------------------------------|------------|-----------------|-----------------------------------------------------------------------------------------|
| Pelobacter propionicus DSM<br>2379 | CP000482.1 | 315395-315321   | TCACCGAAAAGGCAAAATCCGGGGGACCGGATGACGCAAAGCCACCTACCCAGAACGGGAAGAGGGGTTGTCGAA             |
| Pelobacter propionicus DSM<br>2379 | CP000482.1 | 3445254-3445331 | TCTATGAAAAGGCAAACTCAGGGCAACCTGGGGACGCAAAGCCACGGGTCCGCAGCAGCGGACAGCCGGGACATCAAG          |
| Pelobacter propionicus DSM<br>2379 | CP000482.1 | 609688-609613   | AGACGATACTACTTAACCATTGCAAGAATGGGGCGGAAAGCCTAAGGGTCTTACTGAGACAGCCGGGTTGCCGAA             |
| Pelobacter propionicus DSM<br>2379 | CP000482.1 | 609469-609393   | ACACGATAATACTCAACCATCCGCGAGGATGGGGCGGAAAGCCTACAGGGTCTCACCGAGACAGCCGGGTTGCCGAA           |
| Pelobacter propionicus DSM<br>2379 | CP000482.1 | 306485-306561   | TCACCGAAAGGGCACAGCAGGGGCAACCTGTGTGCGCAAAGCTACCATCCCTGAGCGGGGATAGAGGGGTTATCGAA           |
| Pelobacter propionicus DSM<br>2379 | CP000482.1 | 3251882-3251809 | AAACCGAAAAGGCAAAATCCGGGGAACCGGATGACGCAAAGCCACCTCCCAGGCCGGGCAGAGGGGCCGCCGAA              |
| Pelobacter propionicus DSM<br>2379 | CP000482.1 | 2368974-2369055 | TTTTGAAAAGGCCAAACCTTTCGCGAGGAGGGGGCGGAAAGCGAGGGATCTTCCTGAAGAGAAGATGGCCGAGCTGCCAAA       |
| Pelobacter propionicus DSM<br>2379 | CP000482.1 | 2576366-2576288 | TCGCCGAAAGGGTAAAGCACGGGTAACCGTGTGGCACAAAGCCACCATCCAGAATGGTCTGGATAGCGGGGCTGTCGAA         |
| Pelobacter propionicus DSM<br>2379 | CP000482.1 | 2787031-2787107 | AATCGATACTACTAAACCATCCGCGAGGATGGGACGGAAGCCACAGGGTCTCCAGAAGACAGCCGGGTCGCCGAA             |
| Pelobacter propionicus DSM<br>2379 | CP000482.1 | 2645554-2645467 | TTTCCGAAGGGGTAAACCCAGGGTAACCTGGGGACACAAAGCCGCGGGTCCTGATTGGTGGATCGGTCAGGATAGACGGGTGGCGAG |
| Pelobacter propionicus DSM<br>2379 | CP000482.1 | 2448471-2448396 | CCACCGACGGTGCACAGCACGGGTAACCGTGTGTGCGAAAACCTACCATCCCGAAGAGGGATAGAGGGGTTGTCGAA           |
| Pelobacter propionicus DSM<br>2379 | CP000482.1 | 2353262-2353340 | TCGCCGAAAGGGTAAAGCACGGGTAACCGTGTGGCACAAAGCCACCACCCAGCACAAAGCTGGGCAGAGGAGCTGCCGAA        |
|                                    |            |                 |                                                                                         |



|                                                                     |                |                 |                                                                                                                                              |
|---------------------------------------------------------------------|----------------|-----------------|----------------------------------------------------------------------------------------------------------------------------------------------|
| Pelotomaculum<br>thermopropionicum SI DNA                           | AP009389.1     | 1635122-1635210 | AACAAGAAAAGGCAAACCCGGGCGAAAGCCGGGGGCGCAAAGCCATGTGTCCAAAGCCGGGGGAGGCTACTATCGCCAGGCTGCCGCA                                                     |
| Pelotomaculum<br>thermopropionicum SI DNA                           | AP009389.1     | 1981930-1982019 | CTACGTTAAGGGCAAACCCATTGAAAGGTGGGGACGCAAAGCTATAGGGTCTAAGGTACTTCCCGGCACTATGATAGCCTGGCTGTCGCT                                                   |
| Pelotomaculum<br>thermopropionicum SI DNA                           | AP009389.1     | 201391-201476   | CAATGATAATGGCAAATCCACTCGAAAGATGGAGACGCAAAGCCGCGGGTCTAAAGCAATTACGCCATGACAGCCGGGGCTGCCGTG                                                      |
| Pelotomaculum<br>thermopropionicum SI DNA                           | AP009389.1     | 357790-357871   | TTCCGACAAAGGTAAACCCGGCGAAAGCCGGGGGACAAAGCCAGGGGCCTAAAGCGAAAGCCAGGGCAGCCGGCTGCCGGA                                                            |
| Pelotomaculum<br>thermopropionicum SI DNA                           | AP009389.1     | 2800899-2800816 | GCAAGATAAAGGCAAACCCAGTCGAAAGATGGGGACGCAAAGCCACGGGTCTAAAGCACATGCTATGACAGCCGGGTTGCCGTG                                                         |
| Pelotomaculum<br>thermopropionicum SI DNA                           | AP009389.1     | 804550-804637   | TTCTAAAAGGGCAAACCATTCGAAAGAATGGGACGCAAAACCTTGGGTCTAAGGCAGCAAAGCTGCTATGATTGCCAGGTTGCAGGA                                                      |
| Pelotomaculum<br>thermopropionicum SI DNA                           | AP009389.1     | 1181119-1181203 | AACTGTAAAAGGCAAACAGTCCGAAAGGGCTGGGCGCAAAACCACGGGCCTAAGGCATTGCTGCTATGGTCGCCTGGTTGCCAGT                                                        |
| Pelotomaculum<br>thermopropionicum SI DNA                           | AP009389.1     | 2201437-2201300 | TCCACGGAAGGGCAAACCTCCCGAAAGGGTGGGACGCAAAGCTATCGGGCCTAAAGCCGGGTATTGGCGCAAGGACAGCTGCCTAAAAAGGTGCGG<br>CCTTGGCGCCTGTATTGGCCAGGGCGGCCGGGTTGCCAAG |
| Photobacterium damsela<br>subsp. damsela CIP 102761<br>Contig58     | ADBS01000001.1 | 1452434-1452528 | TTACGAACAGGGCAAACCTATCTTGAAAGAGATGGGACGCAAAGCTTCCGGCCTAAAAGTTTATTACATAAGCTCATGGTAGCGGGTTGCCGAT                                               |
| Photobacterium leiognathi<br>subsp. mandapamensis<br>svers.1.1. DNA | BACE01000011.1 | 604993-605083   | GTCACGAACAGGCAAATTAATTGAAAGATTAAGACGCAAACTTCCGGCCTAAAAATTAATTTTAAATTCATGGTAGCGGAGTTACCGAA                                                    |
| Photobacterium profundum<br>3TCK 1099451005265                      | AAPH01000029.1 | 24025-23938     | GTATGTAAAGGGCAAACCTAGTCGAAAGGCTAGGACGCAAAGCTACCGGTTTAAGGGTTACACAGACCTATGACAGCGGAGCCGCCATA                                                    |
| Photobacterium profundum                                            | AAPH01000007.1 | 119243-119159   | CCACATTATTGGCAAACCTATCCTAAAGGGTAGGACGCAAAGCTTCCGGTCTGTCGACGCCAGTCTATGATAGCGGGTTACCGTC                                                        |

|                                                              |                |                 |                                                                                                                    |
|--------------------------------------------------------------|----------------|-----------------|--------------------------------------------------------------------------------------------------------------------|
| 3TCK 1099451005275                                           |                |                 |                                                                                                                    |
| Photobacterium profundum<br>3TCK 1099451005285               | AAPH01000002.1 | 334491-334597   | CACGAAACAAGGCAAACCTATTCGAAAGAATAGGACGCAAAGCTTCCGGCCTAAAAAGGTATTATTTGTATCTTAAATAATAACCCCTCATGGTAGCGGGGT<br>TGCCGAT  |
| Photobacterium profundum<br>SS9 chromosome 2;<br>segment 2/7 | CR378676.1     | 6047-6131       | CCACATTGTTGGCAAACCTATCCTAAAGGGTAGGACGCAAAGCTTCCGGTCTGTCGACGTCAGTCTATGATAGCGGGGTACCGTC                              |
| Photobacterium profundum<br>SS9; segment 7/12                | CR378669.1     | 339100-339205   | CACGAAACAAGGCAAACCTATTCGAAAGAATAGGACGCAAAGCTTCCGACCTAAAAAGGTATTATTTGTGTCTTAAATAATAAACCCCTCATGGTAGCGGGGT<br>TGCCGAT |
| Photobacterium profundum<br>SS9; segment 8/12                | CR378670.1     | 196774-196861   | GTATGTAAAGGGCAAACCTAGTCGAAAGGCTAGGACGCAAAGCTACCGGTTTAAGGGTTATTAAGACCTATGACAGCGGAGCCGCCATA                          |
| Photobacterium sp. SKA34<br>1099521381155                    | AAOU01000011.1 | 39728-39638     | GTCACGAACCTGGCAAATTAATTGAAAGATTAAGACGCAAAACCACCGGCCTAAAAATTATGTTAATAATTCAAGGTAGCGGGGTACCGAA                        |
|                                                              |                |                 |                                                                                                                    |
| Phytophthora infestans<br>T30-4 cont1.15137                  | AATU01015137.1 | 982-1065        | AAATGACAAAGGCAAAACCATCGAAAGATGGTGACGCAAACTATAGGGGCTAAAGCGATTGCTAAGCCAGCCAGTTACCCGA                                 |
| Phytophthora infestans<br>T30-4 cont1.15137                  | AATU01015137.1 | 1224-1311       | TATTGAAAAAGGCAAACCTCATCGAAAGGTGAGGGCGCAAAGCTACAGGAGCTAAAGCGATTCAATCGCCATGCTAGCCAGCTACCACT                          |
|                                                              |                |                 |                                                                                                                    |
| Pirellula staleyi DSM 6068                                   | CP001848.1     | 2667852-2667960 | CCTCGATAAGGGCAAACCGGTAGAGATGCCGGGGCGCAAAGCAAAGGGCCTTTGGCCCGCTGGGATCACGCAAGTGAAGTGGTGGGCGGATGGTAGC<br>CTGGCTGCCGAA  |
|                                                              |                |                 |                                                                                                                    |
| Planococcus donghaensis<br>MPA1U2 contig00001                | AEPB01000001.1 | 112419-112506   | ATCTGAAAAAGGCAAACCTCCATCGAAAGAGGAGGACGCAAAGCCATGAGCCTAACCGTTGAAAAACGCAAGGTCGTCAGGTTGCCAGG                          |
| Planococcus donghaensis<br>MPA1U2 contig00061                | AEPB01000057.1 | 65090-65179     | AAAACGAAAAGGCAAATTTGTCGAAAGACAAAGACGCAAAACCACAGATCTACGGATTGGTAAACAATCTACGATGGCTGGGTTACCGAA                         |

|                                                      |                |                 |                                                                                            |
|------------------------------------------------------|----------------|-----------------|--------------------------------------------------------------------------------------------|
| Pseudoalteromonas<br>haloplanktis ANT/505<br>PH505aq | ADOP01000017.1 | 55100-55013     | CCGCATTGCTGGCAAACCTAGCCGAAAGGTTAGGACGCAAAGTTCCGGTCTAAGGCTTTTATAAAGCTATGGTAGCGGGACTACTGCA   |
| Pseudoalteromonas sp.<br>BSi20429 DNA                | BADV01000004.1 | 32064-32152     | CCGCATTGCTGGCAAACCTAATCGAAAGATTAGGGCGCAAAGTTCCGGTCTAAGGCTTTTATAAAGCTATGGTAGCGGGACTACTGCA   |
| Pseudoalteromonas sp.<br>BSi20652 DNA                | BADT01000169.1 | 30238-30326     | CTGCATTGCAAGCAAACCTAATCGAAAGATTAGGGCGCAAAGTTCCGGTCTAATACTTTTATAAAGCGATTTTAGCGGGACTACTGAA   |
| Pseudoalteromonas sp.<br>SM9913 chromosome I         | CP001796.1     | 971601-971683   | TAAATTAAATGGCAAACCTATGCGAAAGCATAGGACGCAAAGCTTCCAGTCTAAGGCAATCGCTACGATCGTGGGGTTACATTA       |
| Pseudoalteromonas tunicata<br>D2 1099591001413       | AAOH01000011.1 | 15155-15071     | GTTTCGTAAAGGGCAAACCTTAGTGAAAATTAAGGACGCAAAGCTATTGGTCTAAGGGTATTTACCTATGATTGCAAAGCTGCCAAC    |
| Pseudoalteromonas tunicata<br>D2 1099591001414       | AAOH01000001.1 | 581796-581713   | GCAAGTCAAAGGCAAGCCACTTGAAAAAGTAGTCACGCAAAGTTACAGATCTAAGGGGAAACCTATGATGGCTGAACCTACCAAA      |
| Pseudoalteromonas tunicata<br>D2 1099591001417       | AAOH01000007.1 | 198689-198776   | GCACCTATTTGGCAAACCTAACCGAAAGGTTAGGACGCAAAGCTTCCGGTCTACCATCATTTTATGATCATGATAGCGGGGTTGCCGCA  |
|                                                      |                |                 |                                                                                            |
| Pseudomonas fluorescens<br>HK44 Contig7              | AFOY01000007.1 | 5453-5369       | ATACGATAATGGCAAACCCGTCGAAAGGCGGGGACGCAAACTTCCGGTCTAAAGGCTTCGGCCTATGACAGCGGGGTTACCGAA       |
|                                                      |                |                 |                                                                                            |
| Psychromonas ingrahamii<br>37                        | CP000510.1     | 3759112-3759037 | GAAGTTGATTTCGCAAACCTGGGGAAACCTTGGGGCGCAAAGCTATAGGGCCTGTAAAATGGTAGCCAGTTGCCGAA              |
| Psychromonas ingrahamii<br>37                        | CP000510.1     | 3752582-3752507 | GAAAGTCATTTCGCAAACCTTGGGGAAATTAAGGACGCAAACTATAGGGCCTGTAAAATGGCAGCCAGTTGCCAAA               |
| Psychromonas ingrahamii                              | CP000510.1     | 1867279-1867369 | GCTGGAAAAAAGCAAATTAAGGGAAACCTTAATACGCAAAACCACCGCCTGTTGATTGACTATTTAGTCTATGGCAGCGGAGTTACCAAG |

|                                                        |                |                 |                                                                                          |
|--------------------------------------------------------|----------------|-----------------|------------------------------------------------------------------------------------------|
| 37                                                     |                |                 |                                                                                          |
| Psychromonas ingrahamii<br>37                          | CP000510.1     | 3759584-3759509 | ATAACTAATTCGCAAACCTGGGGAAACCCTGGGGCGCAAAGCTATAGGGCCTGTAAAATGGTAGCCAGTTGCCAAG             |
|                                                        |                |                 |                                                                                          |
| Ralstonia pickettii 12D<br>chromosome 2                | CP001645.1     | 592517-592437   | CAGAGGTCTGGGCAAAACCGGAGTGATCCGGCGACGCAAAGCTACAGGGACTTCTCCAGAAGAAGTCAGCCAGTTGCCCCG        |
| Ralstonia pickettii 12J<br>chromosome 2                | CP001069.1     | 148723-148643   | CAGAGGTCTGGGCAAAACCGGAGTGATCCGGCGACGCAAAGCTACAGGGACTTCTCCAGAAGAAGTCAGCCAGTTGCCCCG        |
| Ralstonia solanacearum<br>PSI07 megaplasmid<br>mpPSI07 | FP885891.2     | 25748-25828     | CTGTTGCATTTCGCAAAGCTGGAGTGATCCGGCGACGCAAAGCCAGGGGGACTTCCGTATCGGAAGTCAGCCAGTTGTCCGC       |
| Ralstonia sp. 5_2_56FAA<br>cont1.4                     | ACTT01000004.1 | 7007-6927       | CAGAGGTCTGGGCAAAACCGGAGTGATCCGGCGACGCAAAGCTATAGGGACTTCGCTGGACGAAGTCAGCCAGTTGCCCCG        |
| Ralstonia sp. 5_7_47FAA<br>cont1.11                    | ACUF01000011.1 | 80800-80880     | CAGAGGTCTGGGCAAAACCGGAGTGATCCGGCGACGCAAAGCTATAGGGACTTCGCTGGACGAAGTCAGCCAGTTGCCCCG        |
| Ralstonia syzygii R24                                  | FR854092.1     | 652037-652117   | CTGTTGCATTTCGCAAAGCTGGAGTGATCCGGCGACGCAAAGCCAGGGGGACTTCCGTATCGGAAGTCAGCCAGTTGTCCGC       |
|                                                        |                |                 |                                                                                          |
| Rheinheimera sp. A13L<br>DRAFT__contig00003            | AFHI01000023.1 | 163830-163744   | ACTCAGCAGTGGCACGTCAGCTGAAAAGCTGCACACGCAAACTATGGGCCTAAGGTTGGATCAACTAAGGTTGCCAGGTTGCAGCA   |
| Rheinheimera sp. A13L<br>DRAFT__contig00004            | AFHI01000034.1 | 24932-24849     | GCGCTCGAAAGGCAAGTCTCCCGAAAGGGAGTACACGCAAAGCTGCAGATCTAAGGGGAAACCTATGATGGCTGGGCTGCCGTA     |
|                                                        |                |                 |                                                                                          |
| Rhodoferrax ferrireducens<br>T118                      | CP000267.1     | 4400341-4400428 | CAAGTTCAAAAGCACACCCGATCGAAAGACGGGGTCGCAAAGCTTCCGGCCTGACGCATTCTGTCGAAGTGGTAGCGGGGTTGCCCAA |
|                                                        |                |                 |                                                                                          |

|                                                                 |                |                 |                                                                                                                        |
|-----------------------------------------------------------------|----------------|-----------------|------------------------------------------------------------------------------------------------------------------------|
| Rhodopirellula baltica SH 1<br>complete genome; segment<br>9/24 | BX294141.1     | 222899-223010   | CCCTGACAAAGGCAAACCGTTTCGAGAGGACGGCACGCAAAACCACGGGTCCGTGAGTCGGTCGATCGCATTGTTTGC GTTCGGCTTGGCTTCAGGAA<br>AGCCGAGTTGCCGTG |
| Rhodopirellula baltica<br>WH47 cWH470135                        | AFAR01000123.1 | 12527-12610     | TCAAGAAAACGGCAAACACGTGTAAACGTGGGACGCAAAAGTCATGGATCCATGTTGAAAAACATAGACTGCCAGACCGCCCTG                                   |
| Rhodopirellula baltica<br>WH47 cWH470162                        | AFAR01000149.1 | 3066-2955       | CCCTGACAAAGGCAAACCGTTTCGAGAGGACGGCACGCAAAACCACGGGTCCGTGAGTCGGTCGATCGCATTGTTTGC GTTCGGCTTGGCTTCAGGAA<br>AGCCGAGTTGCCGTG |
|                                                                 |                |                 |                                                                                                                        |
| Ricinus communis<br>ctg_1100012291151                           | AASG02030143.1 | 332-249         | TAGTAACAAGGGCAAATCCATCGAAAGATGGAGACGCAAAATCACCGGTCTACGGGCTTATGCCACGACAGCGGGATTGCCGGC                                   |
|                                                                 |                |                 |                                                                                                                        |
| Rubrivivax benzoatilyticus<br>JA2 contig_67                     | AEWG01000067.1 | 15417-15331     | GCGGCCGATGGGCAAACCCGGCGAAAGCCGGGACGCAAAGCTTCCGGGCTACGGGCGGCAACGCCTACGCCAGCGGGGTTGCCGTC                                 |
|                                                                 |                |                 |                                                                                                                        |
| Ruminococcus albus 7                                            | CP002403.1     | 1557401-1557482 | ATAGTAAAAAGCAAACTACTGAAAAGCAGTGACGCAAAAGCCAAGGGTCTAAGCCGAAAGGTATGACAGCCGGTTGCCATG                                      |
| Ruminococcus albus 7<br>plasmid pRUMAL01                        | CP002404.1     | 212912-212830   | ATATCACAAAGGCAAAATTGCTGAAAGGCAGTGACGCAAAAGCTAAGGGTCTAAGCTCGAAGAGTATGACAGCCGGTTGCATAG                                   |
| Ruminococcus albus 7<br>plasmid pRUMAL01                        | CP002404.1     | 269767-269848   | AAAATATAAAAGCAAAATTGCTGAAAAGCAGTGACGCAAAAGCCAAGGGTCTAAACCGTATGGTATGACAGCCGGTTGCTATA                                    |
| Ruminococcus lactaris<br>ATCC 29176<br>R_lactaris-2.0.1_Cont512 | ABOU02000033.1 | 53420-53326     | AAGTTATACGGGCAAACCTTGACGAAAGTCAGGGACGCAAAAGCCAGATGGGGCTAAATCCAGAGAGATTTTGGATAATGCCAGCCGGTTACAAGA                       |
| Ruminococcus obeum<br>A2-162 draft genome.                      | FP929054.1     | 771178-771253   | TAAGGAAATCGGCAAACCAGATGAAAGTCTGGGACGCAAAAGCTACAGGGCCTTTAAATGGCAGCCAGTTGCATGA                                           |
| Ruminococcus obeum                                              | FP929054.1     | 909571-909654   | TAAATTCAAAGGCAAACCTGTGCGAAAGGCAGGGACGCAAAAGCCATGGGTCTAAGGTCGTGAGATTATGACAGCCGGTTGCCGCA                                 |

|                                                           |                |                 |                                                                                                |
|-----------------------------------------------------------|----------------|-----------------|------------------------------------------------------------------------------------------------|
| A2-162 draft genome.                                      |                |                 |                                                                                                |
| Ruminococcus obeum<br>A2-162 draft genome.                | FP929054.1     | 341399-341474   | TAAGGAAATCGGCAAACCAGATGAAAGTCTGGGACGCAAAGCTACAGGGCCTGTAAAATGGCAGCCAGTTGCATAA                   |
| Ruminococcus obeum<br>A2-162 draft genome.                | FP929054.1     | 2343838-2343928 | TTATTTTAAAGGCAAACCTGCTGAAAGGCAGGGACGCAAAGCCAGAAGGGGCTAAAGTCAGAAAGTTTGACCAGGTCAGCCGGTTGCCACT    |
| Ruminococcus obeum<br>A2-162 draft genome.                | FP929054.1     | 2384071-2384151 | TTAATAAAAAGGCATAGCCGGGGAAATCTGGTGACGCAAACTATAGGGTCTAAGCAAATGTATGACAGCCAGTTGCAGGA               |
| Ruminococcus obeum<br>ATCC 29174<br>R_obeum-MSIQ_Cont105  | AAVO02000002.1 | 48259-48176     | ATAGCATAAAGGCAAACCTGCTGAAAGGCAGGGACGCAAAGCCACGGGTCTAAGGTCGTGAGACTAAGGCAGCCGGTTGCCGCA           |
| Ruminococcus obeum<br>ATCC 29174<br>R_obeum-MSIQ_Cont209  | AAVO02000011.1 | 91921-91996     | TAAGGAAATCGGCAAACCAGATGAAAGTCTGGGACGCAAAGCTACAGGGCCTGTAAAATGGCAGCCAGTTGCATGA                   |
| Ruminococcus obeum<br>ATCC 29174<br>R_obeum-MSIQ_Cont29.1 | AAVO02000031.1 | 25601-25676     | GAAAATAATTGGCAAAGCAGACGAAAGTCTGTGACGCAAAGCTACAGGGCCTGTAAAATGGCAGCCAGTTGCATAA                   |
| Ruminococcus obeum<br>ATCC 29174<br>R_obeum-MSIQ_Cont64.1 | AAVO02000044.1 | 1325-1245       | TTTAAAAAAGGCATAGCCGGGGAAATCCGGTGGCGCAAACTATAGGGTCTAAGCAAATGTATGACAGCCAGTTGCAGGA                |
| Ruminococcus sp.<br>5_1_39B_FAA cont1.118                 | ACII01000118.1 | 6788-6713       | ATACAGTATCAGAAAACAGTCGAAAGGCTGCGGCGCAAAGCTAAAGGGCCTGTAAAATGGCAGCCAGTTGCATTT                    |
| Ruminococcus sp.<br>5_1_39B_FAA cont1.121                 | ACII01000121.1 | 26274-26181     | GGCATTTATTGGCAAACCGGTTGAAAAGCCGGGGCGCAAAGCCAGAAGGAGCTAAAGTCAGATTGAAATCTGGCCATGCCAGCCGGTTGCATCA |
| Ruminococcus sp.<br>5_1_39B_FAA cont1.45                  | ACII01000045.1 | 245-155         | TTATTTTAAAGGCAAACCTGTTGAAAGGCAGGGACGCAAAGCCAGAAGGGACTAAAGTCAGAAAGTTTGACCATGTCAGCCGGTTGCCACT    |

|                                          |                |                 |                                                                                                       |
|------------------------------------------|----------------|-----------------|-------------------------------------------------------------------------------------------------------|
| Ruminococcus sp.<br>5_1_39B_FAA cont1.47 | ACII01000047.1 | 8271-8196       | TATGGAAATTGGCAAACCAGATGAAAGTCTGGGACGCAAAGCTACAGGGCCTGTAAAATGGCAGCCAGTTGCATGA                          |
| Ruminococcus sp. SR1/5<br>draft genome.  | FP929053.1     | 1999710-1999623 | TATATATAAAGGCAAACCTGTTGAAAGACAGGGACGCAAAGCCATGGGTCTAAGGTCCGAAGGATGACTATGACAGCCGGTTGCCGCA              |
| Ruminococcus sp. SR1/5<br>draft genome.  | FP929053.1     | 1653120-1653195 | AAGGATGATCGGCAAACCAGATGAAAGTCTGGGACGCAAAGCTACAGGGCCTGTAAAATGGCAGCCAGTTGCATGA                          |
| Ruminococcus sp. SR1/5<br>draft genome.  | FP929053.1     | 79312-79402     | TTATTTTAAAGGCAAACCTGTTGAAAGGCAGGGTCGCAAAGCCAGAAGGGACTAAAGTCAGAAAGTTTGACCATGTCAGCCGGTTGCCACT           |
|                                          |                |                 |                                                                                                       |
| Saccharophagus degradans<br>2-40         | CP000282.1     | 787494-787401   | CACCTCTAAATGGCTAACCGTCGCGAAAGCGCGGCCACGCAAAGCTTCCGGTCTAAGGGTATGTAAACCATATCTACGATAGCGGGTTGCTGGA        |
| Saccharophagus degradans<br>2-40         | CP000282.1     | 989437-989348   | CAACGATAAAGGCAAACCCGCGGTAACGTGGGGACGCAAAGCCAGTGCCCAACTACTTGTAAATTTAAGATTGGGTCGAACGGTTACCGAA           |
|                                          |                |                 |                                                                                                       |
| Sediment metagenome                      | ADZX01000355.1 | 56-1            | AACCCGAAAAGGCAAATCCGCCGCGAGACGGAGGCGCAAACTACGGGCCGCCAAT                                               |
| Sediment metagenome                      | ADZX01000355.1 | 222-140         | TACCCGAAAAGGCAAACCCGCCGTGAGGCGGGGGCGCAAACTGCGGGTCCCGAAAAGGATTGGGAAAGCCGAGTTGCCGAA                     |
|                                          |                |                 |                                                                                                       |
| Shewanella baltica BA175                 | CP002767.1     | 3998688-3998589 | TACCGTATTTGGCAAACCTAATTGAAAAGTTAGGACGCAAAGCTTCCGGTCTAAGGTTGTAAATGGATTTTTTAGTGAACTAAGATAGCGGAGTTGCCGCA |
| Shewanella baltica BA175                 | CP002767.1     | 1523461-1523549 | GCATGTAAAAGGCAAACCAGTTGAAAACTGGGACGCAAAGCCTCCGGTCTAAGGGTTCGTCTGTACCTATGATAGCGGGGATACCACA              |
| Shewanella baltica OS117                 | CP002811.1     | 3702523-3702435 | GCGTGTAAGGCAAACCAGTTGAAAACTGGGACGCAAAGCCTCCGGTCTAAGGGTTCGTCTGTACCTATGATAGCGGGGATACCACA                |
| Shewanella baltica OS117                 | CP002811.1     | 1124968-1125067 | TACCGTATTTGGCAAACCTAATTGAAAAGTTAGGACGCAAAGCTTCCGGTCTAAGGTTGTAAATGGATTTTTTAGTGAACTAAGATAGCGGAGTTGCCGCA |
| Shewanella baltica OS155                 | CP000563.1     | 3606440-3606352 | GCGTGTAAGGCAAACCAGTTGAAAACTGGGACGCAAAGCCTCCGGTCTAAGGGTTCGTCTGTACCTATGATAGCGGGGATACCACA                |
| Shewanella baltica OS155                 | CP000563.1     | 1022723-1022822 | TACCGTATTTGGCAAACCTAATTGAAAAGTTAGGACGCAAAGCTTCCGGTCTAAGGTTGTAAATGGATTTTTTAGTGAACTAAGATAGCGGAGTTGCCGCA |
| Shewanella baltica OS183<br>ctg588       | AECY01000004.1 | 145226-145127   | TACCGTATTTGGCAAACCTAATTGAAAAGTTAGGACGCAAAGCTTCCGGTCTAAGGTTGTAAATGGATTTTTTAGTGAACTAAGATAGCGGAGTTGCCGCA |

|                                    |                |                 |                                                                                                       |
|------------------------------------|----------------|-----------------|-------------------------------------------------------------------------------------------------------|
| Shewanella baltica OS183<br>ctg589 | AECY01000003.1 | 303129-303041   | GCATGTAAAAGGCAAACCAGTTGAAAACTGGGACGCAAAGCCTCCGGTCTAAGGGTTCGTCTGTACCTATGATAGCGGGGATACCACA              |
| Shewanella baltica OS185           | CP000753.1     | 4117744-4117645 | TACCGTATTTGGCAAACCTAATTGAAAAGTTAGGACGCAAAGCTTCCGGTCTAAGGTTGTAAATGGATTTTTTAGTGAACTAAGATAGCGGAGTTGCCGCA |
| Shewanella baltica OS185           | CP000753.1     | 3685694-3685606 | GCGTGTAAAAGGCAAACCAGTTGAAAACTGGGACGCAAAGCCTCCGGTCTAAGGGTTCGTCTGTACCTATGATAGCGGGGATACCACA              |
| Shewanella baltica OS195           | CP000891.1     | 4224626-4224527 | TACCGTATTTGGCAAACCTAATTGAAAAGTTAGGACGCAAAGCTTCCGGTCTAAGGTTGTAAATGGATTTTTTAGTGAACTAAGATAGCGGAGTTGCCGCA |
| Shewanella baltica OS195           | CP000891.1     | 3806662-3806574 | GCGTGTAAAAGGCAAACCAGTTGAAAACTGGGACGCAAAGCCTCCGGTCTAAGGGTTCGTCTGTACCTATGATAGCGGGGATACCACA              |
| Shewanella baltica OS223           | CP001252.1     | 4025248-4025149 | TACCGTATTTGGCAAACCTAATTGAAAAGTTAGGACGCAAAGCTTCCGGTCTAAGGTTGTAAATGGATTTTTTAGTGAACTAAGATAGCGGAGTTGCCGCA |
| Shewanella baltica OS223           | CP001252.1     | 1519289-1519377 | GCGTGTAAAAGGCAAACCAGTTGAAAACTGGGACGCAAAGCCTCCGGTCTAAGGGTTCGTCTGTACCTATGATAGCGGGGATACCACA              |
| Shewanella baltica OS625<br>ctg153 | AGEX01000004.1 | 490432-490344   | GCGTGTAAAAGGCAAACCAGTTGAAAACTGGGACGCAAAGCCTCCGGTCTAAGGGTTCGTCTGTACCTATGATAGCGGGGATACCACA              |
| Shewanella baltica OS625<br>ctg156 | AGEX01000001.1 | 127426-127327   | TACCGTATTTGGCAAACCTAATTGAAAAGTTAGGACGCAAAGCTTCCGGTCTAAGGTTGTAAATGGATTTTTTAGTGAACTAAGATAGCGGAGTTGCCGCA |
| Shewanella baltica OS678           | CP002383.1     | 3754926-3754838 | GCGTGTAAAAGGCAAACCAGTTGAAAACTGGGACGCAAAGCCTCCGGTCTAAGGGTTCGTCTGTACCTATGATAGCGGGGATACCACA              |
| Shewanella baltica OS678           | CP002383.1     | 4172590-4172491 | TACCGTATTTGGCAAACCTAATTGAAAAGTTAGGACGCAAAGCTTCCGGTCTAAGGTTGTAAATGGATTTTTTAGTGAACTAAGATAGCGGAGTTGCCGCA |
| Shewanella denitrificans<br>OS217  | CP000302.1     | 2534228-2534317 | TGCTGTGGAAGGCAAACCAGTTTAAAGACTGGGACGCAAAGCCTCCGATCTAAAGGTTTGCTTGTACCTATGATAGCGGGGATCCACA              |
| Shewanella halifaxensis<br>HAW-EB4 | CP000931.1     | 4237453-4237540 | ACAGCGAAAAGGCAAACCAGTTGAAAGACTGGGACGCAAACCACCGGTCTAAGGGTCAATTGTACCTATGATAGCGGGGATGCCATT               |
| Shewanella halifaxensis<br>HAW-EB4 | CP000931.1     | 4546741-4546656 | TGATGAAAAGGCAAAACCTGTGAAAGCGGGTGACGCAAAGCATCCAGCCTAACGGAGCAACTCCTACGGCAGTGGCGCTACCGCA                 |
| Shewanella loihica PV-4            | CP000606.1     | 1879203-1879288 | CTCTCGAAACGGCAAGCATTAAGTAATTAATGTACGCAAAGCCACAGGCCCTAATTGCATAGCAAAAGGGTGGCTGGGTTACCGAA                |
| Shewanella oneidensis<br>MR-1      | AE014299.1     | 1112481-1112574 | CACCGTATTGGGCAAACCTAATTGAAAAATTAGGACGCAAAGCCTCCGGTCTAAGGTTGTAAAGGGATGTTAACTAAGATAGCGGGGTTGCTTAA       |
| Shewanella pealeana ATCC<br>700345 | CP000851.1     | 4449140-4449058 | TGATGAAAAGGCAAAACCTGTGAAAGCAGGTGACGCAAAGCATCCAGCCTAAGGGGACACCTATGGCAGTGGCGCTACCGCA                    |



|                                      |                |                 |                                                                                                                               |
|--------------------------------------|----------------|-----------------|-------------------------------------------------------------------------------------------------------------------------------|
| Shewanella putrefaciens 200          | CP002457.1     | 712651-712733   | CTGACGAACAGGTACACCCGTTGTGAGACGGGGTCGCAAAGCTTCGGGTCTTGATTTTTTATTAAGATAGCCGGGTTGCCGAA                                           |
| Shewanella sediminis<br>HAW-EB3      | CP000821.1     | 3858383-3858465 | CTACGATAAAGGCAAAACCGGGTAACCCGGCGACGCAAAACCAGTGCCAGGCAGAGATGCGGGGGTCGAACGGTTACCGAA                                             |
| Shewanella sp. ANA-3<br>chromosome 1 | CP000469.1     | 3587317-3587229 | TAGTGTAAAGGCAAACCAATCGAAAGATTGGGACGCAAAGCCTCCGGTCTAAGGGTTCGTTTGTACCTATGATAGCGGGGATACCACA                                      |
| Shewanella sp. ANA-3<br>chromosome 1 | CP000469.1     | 1061668-1061763 | CACCGTATTTGGCAAACCTAATTGAAAAATTAGGACGCAAAGCCTCCGGTCTAAGGTTGTAAAGGGATGTTGTAACCTAAGATAGCGGGGTTGCCTCT                            |
| Shewanella sp. HN-41<br>44_14        | AFOZ01000014.1 | 232524-232623   | TACTGTATTTGGCAAACCTAATTGAAAAGTTAGGACGCAAAGCCTCCGGTCTAAGGTTGTAAAGGGATTTTTTAGTGAACCTAAGATAGCGGAGTTGCCGC<br>A                    |
| Shewanella sp. HN-41<br>44_15        | AFOZ01000015.1 | 27168-27256     | ATGTGTAAAGGCAAACCAGTTGAAAACTGGGACGCAAAGCCTCCGGTCTAAGGGCTCGTCCGTACCTATGATAGCGGGGATACCACA                                       |
| Shewanella sp. MR-4                  | CP000446.1     | 3621627-3621532 | CACCGTATTTGGCAAACCTAATTGAAAAATTAGGACGCAAAGCCTCCGGTCTAAGGTTGTAAAGGGATGTTGAACTAAGATAGCGGGGTTGCCTCA                              |
| Shewanella sp. MR-4                  | CP000446.1     | 3357377-3357290 | TATTGTGAAAGGCAAACCAATTGAAAGATTGGGACGCAAAGCCTCCGGTCTAAGGGTCGTTTGTACCTATGATAGCGGGGATACCGCA                                      |
| Shewanella sp. MR-4                  | CP000446.1     | 4029417-4029328 | CTGACGAACAGGCACACCCGTTGTGAAACGGGGTCGCAAAGCTTCGGATCTTATTGTACAGGCTGTTATTAAGATGGCTGAGTTGCCGAA                                    |
| Shewanella sp. MR-7                  | CP000444.1     | 675036-675125   | CTGACGAACAGGCACACCCGTTGTGAAACGGGGTCGCAAAGCTTCGGATCTTATTGTACAGGCTGTTATTAAGATGGCTGAGTTGCCGAA                                    |
| Shewanella sp. MR-7                  | CP000444.1     | 3427742-3427655 | TATTGTGAAAGGCAAACCAATTGAAAGATTGGGACGCAAAGCCTCCGGTCTAAGGGTCGTTTGTACCTATGATAGCGGGGATACCGCA                                      |
| Shewanella sp. MR-7                  | CP000444.1     | 1084468-1084563 | CACCGTATTTGGCAAACCTAATTGAAAAATTAGGACGCAAAGCCTCCGGTCTAAGGTTGTAAAGGGATGTTGAACTAAGATAGCGGGGTTGCCTGA                              |
| Shewanella sp. W3-18-1               | CP000503.1     | 3966333-3966251 | CTGACGAACAGGTACACCCGTTGTGAGACGGGGTCGCAAAGCTTCGGGTCTTGATTTTTTATTAAGATAGCCGGGTTGCCGAA                                           |
| Shewanella violacea DSS12<br>DNA     | AP011177.1     | 990519-990638   | TTGAATAAAAGGCAAACCAATCGAAAGATTGGGACGCAAAGCCTCCGGTCTAAGGGGATAGTGTTGAGGCGGTGTTGTCTCAGTATTATCGCAGTACC<br>TAAGATAGCGGGGATACTTCA   |
| Shewanella woodyi ATCC<br>51908      | CP000961.1     | 1418939-1419059 | AATGTACAAAGGCAAACCAATCGAAAGATTGGGACGCAAAGCTTCGGTCTAAGGGGATAGTGTTTGTAGAGGGTCGCACTCTTAACGTTATTTTGGTAC<br>CTATGATAGCGGGGATGTTACA |
| Shewanella woodyi ATCC<br>51908      | CP000961.1     | 4728867-4728769 | CCATGTATTTGGCAAACCTAGCTGAAAAGTTAGGACGCAAAGCTTCGGTCTAAGGTGCAGGACTCACTGAGTGCTCATTAAAGATAGCGGGGTTGCCACG                          |
|                                      |                |                 |                                                                                                                               |

|                                                         |                |                 |                                                                                                           |
|---------------------------------------------------------|----------------|-----------------|-----------------------------------------------------------------------------------------------------------|
| Sideroxydans lithotrophicus<br>ES-1                     | CP001965.1     | 1136910-1137012 | CGCCTGCAAGGGCAAACCCGTCGAAAGGCGGGGACGCAAAGTTTCCGGGCTAAAGGACATGTTCTATTTCGACATCAGGTGAGTGCCAGCGGGCT<br>GCCAGG |
| Sideroxydans lithotrophicus<br>ES-1                     | CP001965.1     | 2226794-2226883 | GTAAACTAATAGCAAACCTATTGAAAGGTAGGGACGCAAAGTTTCCGGTCTAAGGGGTCTGCAAAGCCCTATGACAGCGGGATTGCCGGT                |
| Sideroxydans lithotrophicus<br>ES-1                     | CP001965.1     | 1143960-1144044 | TATTGATAAAGGCAAACCTGTTGAAAAGCAGCGACGCAAAGTTTCCGGTCTAAGGCAAAAAACCTTTGATAGCGGGGCCGCAAAA                     |
| Sideroxydans lithotrophicus<br>ES-1                     | CP001965.1     | 1575864-1575784 | TCTTCAACTTGGCAAACATGCTGAAAAGTATGGACGCAAAGTCTCCGGCCTAAGGGAAGCTATGGCAGCGGGACTGCGATA                         |
|                                                         |                |                 |                                                                                                           |
| Slackia exigua ATCC<br>700122<br>S_exigua-2.0.1_Cont0.5 | ACUX02000006.1 | 76573-76498     | GCAATTACTCGGCAAACCCGTCGAAAGGCGGCGACGCAAAGCTACAGGGCCTTTCATATGGCAGCCAGCTGCAACT                              |
| Slackia exigua ATCC<br>700122<br>S_exigua-2.0.1_Cont1.6 | ACUX02000016.1 | 4891-4816       | CAATATAATGGCAAACCCGTCGAAAGACGGCGACGCAAAGCTATAGGGCCTTTCGCATGGCAGCCAGCTGCGATT                               |
|                                                         |                |                 |                                                                                                           |
| Sphaerobacter thermophilus<br>DSM 20745 chromosome 2    | CP001824.1     | 1166952-1166875 | AGCTGAAAAGGGCAAACCCGTCGCGAGGCGGGGGCGCAAAGCCATGGACCTCCACCCGAGGCCGCCAGGCTGCCAGC                             |
|                                                         |                |                 |                                                                                                           |
| Sphingobium<br>chlorophenicum L-1<br>chromosome 2       | CP002799.1     | 74281-74206     | TCCCGACAGGGGCAAACCTGCCGGTGACGGCAGGACGCAAAGCTTCCGGGCTGTCAACAGCTAGCGGGGTTGCGAAG                             |
| Sphingobium sp. SYK-6<br>DNA                            | AP012222.1     | 431488-431561   | CTTCGCCAAGGGCAAACCCGTCGGTAACGGCGGGACGCAAAGCCTCCGGCCCCATGGGGTAGCGGGGTTGCCGGA                               |
|                                                         |                |                 |                                                                                                           |

|                                                  |                |             |                                                                                                                                         |
|--------------------------------------------------|----------------|-------------|-----------------------------------------------------------------------------------------------------------------------------------------|
| Sphingomonas sp. KC8<br>contig05                 | AFMP01000005.1 | 19735-19660 | TTCGTTGAAGGGCAAACCTGTCGGCGACGGCAGGGCGCAAAGCCTCCGGGCTCCAAGGAGCTAGCGGGGCCGCCAGC                                                           |
|                                                  |                |             |                                                                                                                                         |
| Sporolactobacillus inulinus<br>CASD contig000045 | AFVQ01000045.1 | 158-241     | TAATCGAAATGGCACACTTATTGAAAGATAAGGTCGCAAAGCCACGGGCCTAAGGCAATGAGCTAGGGTAGCCGGGCTGCCGAA                                                    |
|                                                  |                |             |                                                                                                                                         |
| Sporosarcina newyorkensis<br>2681 contig00077    | AFPZ01000077.1 | 28087-27977 | AGAAGTTAAAGGCAAACCTGATCTGAAAGGGCAGGACGCAAAGCTTAGGGTCTAAAGTTAGGGATTATTTAAAAGTCCTGCAATCTAAACAATGATCGC<br>CTGGTTACCAAG                     |
|                                                  |                |             |                                                                                                                                         |
| Streptococcus sobrinus<br>TCI-157 contig00006    | AGHO01000006.1 | 8967-8882   | CTTCGAAAATAGCAAACCTATTGAAAAATGAGGACGCAAAGCTGCGGGCCTAAAGAAGTATTTCCATGGTAGCCAGGGTTGCCAAA                                                  |
| Streptococcus sobrinus<br>TCI-157 contig00006    | AGHO01000006.1 | 11648-11562 | AATTGAAAAAGGCAAACCTATCGAAAGGTAAGGACGCAAAGCTACGAGTCTAAATCCTTCTGGATAATGATAGTCGGGTTGCCAGG                                                  |
| Streptococcus sobrinus<br>TCI-157 contig00162    | AGHO01000162.1 | 658-743     | AAATGTAAGGCAAACCAATACGAAAGTTTGGGACGCAAAGTCACGGATCTAATGTCTTAAACAATGATGGCCGGACTGCCAAA                                                     |
| Streptococcus sobrinus<br>TCI-157 contig00508    | AGHO01000508.1 | 2825-2913   | AACAGATAAGGCAAACCATCTGAAAGGGTGGGACGCAAAGCTTCGGGTCTAAGGTAGATTTTTTACTATGATGGCTGGGCCACCTTA                                                 |
| Streptococcus sobrinus<br>TCI-157 contig00601    | AGHO01000601.1 | 995-910     | AAATGATAAGGCAAATTCATCGAAAGGTGAAGACGCAAAGCTATAGGGACTAAGATCGTGGAGATTAAGTCAGCCAGTTACCGAT                                                   |
| Streptococcus sobrinus<br>TCI-157 contig00961    | AGHO01000961.1 | 927-797     | TCGACGAAAGGGCAAAATCATTGAAAAGTGATGACGCAAAGCTATAGGGGCTTAGGGGTAACGAAGATCGATTTTTTCTACATGATAGCAAAAGTTATG<br>ACATTCATTACGCTTGCCAGCCAGTTACCGAA |
| Streptococcus sobrinus<br>TCI-157 contig02613    | AGHO01002613.1 | 128-211     | ATTAAGTTTGGGCAAATTTTACGAAAGTAAAGACGCAAAGCCACGGGCCTAAAGCGAAATGCTATGGCAGCCGGGTTGCCAAG                                                     |
|                                                  |                |             |                                                                                                                                         |
| Stromatolite metagenome                          | ABMV01167972.1 | 1-100       | AAAGCAAACCTGCTCGAAAGCGCAGGACGCAGAGCCACGGAGCTAACGACCGAAAGCGGACGTTTCCGTCCGCTCAGGTACATGCCCGCCGGGCCGCC                                      |

|                                                  |            |                 |                                                                                                                    |
|--------------------------------------------------|------------|-----------------|--------------------------------------------------------------------------------------------------------------------|
| 10218074                                         |            |                 | ATG                                                                                                                |
|                                                  |            |                 |                                                                                                                    |
| Sulfobacillus acidophilus<br>TPY                 | CP002901.1 | 2801999-2801912 | TGTCGTTCAAGGCACAACATCCGAAAGGGTGTGTCGCAAAGCCAGAGGGTCTAAGCCCTGAAGGGGGTATGACAGCCGTGCTGCCGAC                           |
| Sulfobacillus acidophilus<br>TPY                 | CP002901.1 | 1797527-1797611 | GAACGATAAAGGCAAACCATGCGAAAGCATGGGACGCAAAGCTAGAGGGGCTTATCGCATCCGCGATTGCCAGCCAGCTGCCGAA                              |
|                                                  |            |                 |                                                                                                                    |
| Sulfuricurvum kujiense<br>DSM 16994              | CP002355.1 | 1608921-1608845 | AAAATTCAAAGCCAAACCTGCTGTGAAGCAGGGACGGAAAGCCGCGGGTCTCAAAGCGAGATAGCCGGGTGTGCATT                                      |
|                                                  |            |                 |                                                                                                                    |
| Sulfurimonas autotrophica<br>DSM 16294           | CP002205.1 | 2068864-2068781 | ACTATAATTTGCCAAACTTATTGTGAAATAAGGACGGAAAGCTTTGAGTCTTAATTAGTAAATTAAGATTGTCGGGTGCGATT                                |
|                                                  |            |                 |                                                                                                                    |
| Sulfurovum sp. NBC37-1<br>genomic DNA            | AP009179.1 | 2164685-2164587 | GAAAGAAAACGCCACCCCTGTTGCGAAGCAGGTTTCGGAAGCTATGGGTCTTTGATGCTGTCGCCTGGCAGCAGACGAGAAGATCGCCAGGTTGCCTA<br>A            |
| Sulfurovum sp. NBC37-1<br>genomic DNA            | AP009179.1 | 1220413-1220339 | TCTAATATATGCCAAACCTGTTGCGAAACAGGGACGGAAAGCCACGGGTCTCATGAAGATAGCCGGGTGCCAGA                                         |
| Sulfurovum sp. NBC37-1<br>genomic DNA            | AP009179.1 | 1968269-1968348 | ACGATGAAAAGCCAAACCTGCTGTGAAAGCAGGAGCGGAAAGTTGTGGGTCTTCATTTTGAAGACAGCCAGACTGCCAAG                                   |
| Sulfurovum sp. NBC37-1<br>genomic DNA            | AP009179.1 | 1900452-1900372 | AAATGAAAAGCCAAACTTGTGTGAGACAGGGACGGAAAGTTATGGGACTTTAGAATATCAAGTTTACCAGACTGCCATA                                    |
|                                                  |            |                 |                                                                                                                    |
| Symbiobacterium<br>thermophilum IAM 14863<br>DNA | AP006840.1 | 3227495-3227385 | CAGCGATAAAGGCACACCCGCCGAAAGACGGGGCCGCAAAGCCACGGGGCTACAGGAAGCGGGCGCCGCCCTGCCGGGTCTCCGCCTCCCATGCTA<br>GCCGGGCTGCCGCT |

|                                         |            |                 |                                                                                                   |
|-----------------------------------------|------------|-----------------|---------------------------------------------------------------------------------------------------|
| Syntrophobacter<br>fumaroxidans MPOB    | CP000478.1 | 611274-611193   | GTTAGAAAAAGCCAAATCCATCGCAAGGTGGAGACGGAAAGCCGCGGTCTCCTTCCCATTCGAGACGGCCGGTTGCCTGA                  |
| Syntrophobacter<br>fumaroxidans MPOB    | CP000478.1 | 4137263-4137350 | GTTGATAATGGCAAACCTGGTCGAAAGACCGGGACGCAAAGCCACTGGCCTAAGTCCCCTCTGAGGATACGGTAGCAGGGTCGCCGGG          |
| Syntrophobacter<br>fumaroxidans MPOB    | CP000478.1 | 4310866-4310955 | ACCCGAAAAAGGCAAACCATTCGAAAGGGTGGGACGCAAAGCCACTGGCCTACGTCTTCCGAGGGAGGATAGGGCGGCAGGGTTGCCGGA        |
| Syntrophobacter<br>fumaroxidans MPOB    | CP000478.1 | 4434364-4434438 | GTCAGAAAACGCCAACCTGTTGCGAGACGGGGACGGAAAGCCGCGGTCTCATGGAGATGGCCGGGTTGCCTGA                         |
| Syntrophobacter<br>fumaroxidans MPOB    | CP000478.1 | 4546395-4546307 | ACCTGTAAAGGGCAAACCATCCGAAAGGGTGGGACGCAAAGCCGCTGGCCTAAGTCCCCCGCTGGGATATGGCAGCAGGGTTGCCAGG          |
| Syntrophobacter<br>fumaroxidans MPOB    | CP000478.1 | 4864953-4864879 | TTGTGAAAAAGCCAAACCTCCCGCAGGGGGGGACGGAAAACCGCGGTCTCACGTAGACGGCCGGGTTGCCTGA                         |
| Syntrophobacter<br>fumaroxidans MPOB    | CP000478.1 | 3150567-3150651 | GTTTGAAAAAGGCAAACCTATTCGAAAGACTGGGACGCAAAGCTTCTGGCCTAAGTCCAAAAGGATATGGCAGCAGAGCCGCCGAG            |
|                                         |            |                 |                                                                                                   |
| Syntrophobotulus glycolicus<br>DSM 8271 | CP002547.1 | 1225438-1225527 | TATCGCTAAGGGCAAACCCGCTGAAAAACGGGGATGCCAAAGCTATAGGGTCTAAGGCGCATCTAACGCTATGATAGCTTGGCTGCCAAA        |
| Syntrophobotulus glycolicus<br>DSM 8271 | CP002547.1 | 1642369-1642294 | TACTGACAATGGCAAACCTGCTGAAAAGCAGCGACGCAAAGCTAAAGGCCTGTAACATGGCAGCCAGCTACCAA                        |
| Syntrophobotulus glycolicus<br>DSM 8271 | CP002547.1 | 1070289-1070372 | GAGCGATAAGAGTAAACCTGTCCAAAGACAGGGACGCAAAGCTATAGGGTCTAGGTGCTTACAGTTCAAAAGTCAGTTATTAAC              |
| Syntrophobotulus glycolicus<br>DSM 8271 | CP002547.1 | 1516492-1516575 | TGACGATAAGAGCACACCTTCCGAAAGGATGGGCCGCAAAGTCACGGGTCTAAAGCGATTGCCAGGATTGCCGGACTGCCGAA               |
| Syntrophobotulus glycolicus             | CP002547.1 | 829966-830072   | GAAGTGAAGAGGCAAACCTTGCCGAAAGGCAAGGACGCAAAGCTACGGGTCTAAAGCCCGCATTTTCTTGAGAAAAAATGCCGGGCCAGGACCGCCG |

|                                           |                |                 |                                                                                                          |
|-------------------------------------------|----------------|-----------------|----------------------------------------------------------------------------------------------------------|
| DSM 8271                                  |                |                 | GGCCGCCGAA                                                                                               |
| Syntrophobotulus glycolicus<br>DSM 8271   | CP002547.1     | 20507-20418     | TAAAGCCAAGGGCAAACCCATCAAAGATGGGGACGCAAAGCCATAGGGTCTAAGGTGCTTTACTGCGCTATGATAGCCTGGCTGCCAAA                |
| Syntrophobotulus glycolicus<br>DSM 8271   | CP002547.1     | 3225788-3225704 | ATATGATAAGAGTAAACCTGTGCGAAAAGACAGGGACACAAAGCCACGGGTCTAAAGTAATCTAACCATGATAGCCGGGTGCCATA                   |
| Syntrophobotulus glycolicus<br>DSM 8271   | CP002547.1     | 3349441-3349353 | GAATATTAAGGGCAAACCTGTGGAAATGCAGGGACGCAAAGCTATGGGTCTAAAGATATGAGAGTATCAATGACTGCCAGGCCGCTATT                |
| Syntrophobotulus glycolicus<br>DSM 8271   | CP002547.1     | 1642478-1642403 | TATTGACAATGGCAAACCTGCTGAAAAGCAGCGACGCAAAGCTAAAGGGCCTGTAACATGGCAGCCAGCTACCAAA                             |
| Syntrophobotulus glycolicus<br>DSM 8271   | CP002547.1     | 3108266-3108357 | TATTGCCAAGGGCAAACCCGGTGAAAGCCGGGGGCGCAAAGCTACAGGGTCTAAGGCGTTTGATAAACGCTACGATAGCCTGGCTGCCAAA              |
|                                           |                |                 |                                                                                                          |
| Syntrophothermus<br>lipocalidus DSM 12680 | CP002048.1     | 1229385-1229300 | AACAACCTAAGGGCAAACCTACCGAAAGGTGAGGGCGCAAAGCCTCGGGCCTAAGGGCGAGGAGTCTATGGCGGCCGGGTTCCTTA                   |
| Syntrophothermus<br>lipocalidus DSM 12680 | CP002048.1     | 1301529-1301443 | TCCTGATAAAGGCAAAACCATCCAAAGATGGTGACGCAAAGCTATAGGGGCTAAAGCGAACATTGCTATGCCAGCCAGCTGCCGGG                   |
|                                           |                |                 |                                                                                                          |
| Tepidanaerobacter sp. Re1                 | CP002728.1     | 939896-939796   | GATATAATTTGGCAAACCTCCTCCAAAGAGGTGGGCGCAAAGCCATGGGCCTAAAGTTTTTCTGGCTTTTCGCGAAAACTATGGCAGCCAGGCTGCTG<br>GT |
|                                           |                |                 |                                                                                                          |
| Teredinibacter<br>turnerae<br>T7901       | CP001614.2     | 634901-634815   | CTGATAAAAAGGCACGCTGACGCGAAAGCCCAGCACGCAAAATTACCGGTCTAAGGACTCAAGGTCTACGACAGCGGGATCGCCAGA                  |
|                                           |                |                 |                                                                                                          |
| Thauera selenatis AX                      | CACR01002012.1 | 2225-2139       | CGAGTACAAAGCAAACGGGGTGGAAGCCCCGGACGCAAAGCCACGGACCCAAAGCTGGTTTCCAGACGGGTGGCCGGGTTCCTCG                    |
| Thauera selenatis AX                      | CACR01001638.1 | 11522-11608     | CGAGTCCAAAGCAAACGGGGCGGAAGCCCCGGACGCAAAGCTACAGGCCCGATCCTGGATGTCAGGGGGGCGGCTGGGTTCCTCG                    |

|                                                              |                |                 |                                                                                                                                        |
|--------------------------------------------------------------|----------------|-----------------|----------------------------------------------------------------------------------------------------------------------------------------|
| Thermaerobacter<br>marianensis DSM 12885                     | CP002344.1     | 198923-199054   | GCCGCGAACGGGCAAACCCGCCGAAAGGCGGGGGCGCAAAGCCACGGGTCTACCGCGCGCGGGAGCGGAAGGCGGCGACGGGCAGCCGCCGCGC<br>CTCCGGCCCCCGCGGCTACGACGGCCGGGTGCCGAA |
| Thermaerobacter<br>marianensis DSM 12885                     | CP002344.1     | 1187425-1187517 | CAGCGACAAAGGCACCCCTGCCGAAAGGCAGGCTCGCAAAGTCACGGGTCTACGGTCCCGCTCCGGCGGGACTATGACGGCCGGACTGCCGAA                                          |
| Thermaerobacter<br>subterraneus DSM 13965<br>Tsubt_Contig168 | AENY01000069.1 | 35051-35143     | CAGCGACAAAGGCACCCCTGTCGAAAGGCAGGTTCGCAAAGTCACGGGTCTAAGGTCCCGCCAGCACGGGACTATGACGGCCGGACTGCCGAA                                          |
| Thermaerobacter<br>subterraneus DSM 13965<br>Tsubt_Contig194 | AENY01000095.1 | 131782-131726   | CCGCGATAAAGGCAAACCCGCCGAAAGGCGGGGGCGCAAAGCCACGGGTCTACCGCA                                                                              |
|                                                              |                |                 |                                                                                                                                        |
| Thermincola sp. JR                                           | CP002028.1     | 2870835-2870749 | TATAAAGTTGGCAAACCTTCGCGAAAGTGAAGGACGCAAAGCTATGGGTCTACGGCCAGGGGAGGTTATGATTGCCAGGTTGCGGTT                                                |
| Thermincola sp. JR                                           | CP002028.1     | 434673-434757   | TATATCGTTTGGCAAACCATGCGAAAGCATGGGGCGCAAAGCCATGGGTCTACGGCCGAAGGGCCAGGATTGCCAGGTTGCAGTA                                                  |
| Thermincola sp. JR                                           | CP002028.1     | 2921021-2920938 | CCACGATAAAGGCTAAGCCGTCGAAAGACGGTGGCGCAAAGCCATGGGTCTAAAGCTTATTGCTATGATCGCCAGGCTGCCGAA                                                   |
| Thermincola sp. JR                                           | CP002028.1     | 891749-891848   | TGGTGAAAAGGGTAACTTATCGAAAGATAAGGACACAAAGCCATGGGTCTACGGAATGGTGTCCAGTGGTCATTATTCTATGATTGCCAGGCTGCCGA<br>A                                |
| Thermincola sp. JR                                           | CP002028.1     | 1107721-1107812 | AAGTCATTTTGGCAAACCTCCGCGAAAGTGGGGGACGCAAAGCATGGGTCTGGATACGCCGCGGAAAGGCAGGGATCGCCAGGTTGCAGCA                                            |
| Thermincola sp. JR                                           | CP002028.1     | 728265-728363   | TTTCGAAAAAGGCAAACCTGTCGAAAGGCGGGGACGCAAAGCTGCGGGTCTAAGGAATTAGTGGCCGGTCCACTACTCTATGACAGTCGGGCTGCCG<br>AA                                |
| Thermincola sp. JR                                           | CP002028.1     | 1610190-1610104 | CTTTGATAAAGGCAACTTTATCGAAAGATAAAGGCGCAAAACTACGGGCCTAAAGCGACATAACGAATGGTTGCCGGGTTGCCGAA                                                 |
| Thermincola sp. JR                                           | CP002028.1     | 2160379-2160275 | TCAGTGTTGGTGTAACCCAGTGAAAGCTGGGGGCGCTAAAGCCCAAGGGCCTAAGGATACAGTGGGGCCAATGACCGCTGATCTACGGCAGCCGGGA<br>TGCAAGG                           |
| Thermincola sp. JR                                           | CP002028.1     | 2411555-2411433 | GATAATATTGGGCAAACCCGTACGAAAGACGGGGCGCAAAGCCGTGGGTCTACGAATTAGTGACCAGTGCCGGTGACTATGTGGCTACTGACCACT<br>GATTTATGACAGCCTGGTTGCCGCA          |

|                                                             |                |                 |                                                                                                                                                            |
|-------------------------------------------------------------|----------------|-----------------|------------------------------------------------------------------------------------------------------------------------------------------------------------|
| Thermincola sp. JR                                          | CP002028.1     | 1656944-1657065 | GACTGACAAAGGCAAACCTTGTCGAAAGACAGTGACGCAAAGCTATTGATCTAAGGCACAGCAGCAGTTGGCAACCATATGATTTTCCAACTGCCCCGT<br>TGCTATGACCGCAGGGCTGCCAAC                            |
| Thermincola sp. JR                                          | CP002028.1     | 1894931-1894781 | GTCCCGAAACGGCAAACAGGTGAAAATCTGGGACGCAAAGCCACGGGTCTACGAATTGGTGTACTAGTGACCAGTGACCGGTAAATAAAAAATAGAC<br>CGGTTACTGGCTGTGGACCACTGGTCGCTGATTTACGACAGCCGGGTACCGAA |
|                                                             |                |                 |                                                                                                                                                            |
| Thermoanaerobacter brockii<br>subsp. finnii Ako-1           | CP002466.1     | 1533383-1533296 | TGTTGAAAAAGGCAAACCTCGTCGAAAGGCGGGGACGCAAAGCCACGGGTCTAAAGCGATAGTTTTGCTATGATAGCCGGGCTGCCAAC                                                                  |
| Thermoanaerobacter<br>ethanolicus CCSD1<br>ctg00037         | ACXY01000004.1 | 66574-66487     | TGTTGAAAAAGGCAAACCTCGTCGAAAGGCGGGGACGCAAAGCCACGGGTCTAAAGCGATAGTTTTGCTATGATAGCCGGGCTGCCAAC                                                                  |
| Thermoanaerobacter<br>ethanolicus JW 200 ctg1011            | AEYS01000015.1 | 35189-35102     | TGTTGAAAAAGGCAAACCTCGTCGAAAGGCGGGGACGCAAAGCTACGGGTCTAATGCAACAGTTTTGCTATGATAGCCGGGCTACCAAC                                                                  |
| Thermoanaerobacter<br>ethanolicus JW 200 ctg1018            | AEYS01000011.1 | 74563-74493     | TATTGAAAAAGGCAAGGGCGCAAAGCCACAGGTCTACAGTATGCAAATACTATGACGGCTGGGTTGCCAAT                                                                                    |
| Thermoanaerobacter italicus<br>Ab9                          | CP001936.1     | 837524-837611   | TGTTGAAAAAGGCAAACCTCGTCGAAAGGCGGGGACGCAAAGCCACGGGTCTAAAGCAATAATCTTGCTATGACAGCCGGGCTGCCAAC                                                                  |
| Thermoanaerobacter italicus<br>Ab9                          | CP001936.1     | 1888656-1888744 | TGTCGATAAGGGCACACTTATCGAAAGGTAAGGTCGCAAAGCCATGGGTCTAAGGAATGAATATTCCTATGATCGCCAGGCTGCCGAA                                                                   |
| Thermoanaerobacter italicus<br>Ab9                          | CP001936.1     | 2124854-2124940 | TTATGAGAAAGGCAAACCTACCGAAAGGTAAGGACGCAAAGCCACAGGTCTAAGGCATGCAGATGCTATGACGGCTGGGTTGCCAAT                                                                    |
| Thermoanaerobacter<br>mathranii subsp. mathranii<br>str. A3 | CP002032.1     | 1839377-1839465 | TGTCGATAAGGGCACACTTATCGAAAGGTAAGGTCGCAAAGCCATGGGTCTAAGGAATGAATATTCCTATGATCGCCAGGCTGCCGAA                                                                   |
| Thermoanaerobacter<br>mathranii subsp. mathranii            | CP002032.1     | 851894-851981   | TGTTGAAAAAGGCAAACCTCGTCGAAAGGCGGGGACGCAAAGCCACGGGTCTAAAGCAATAATCTTGCTATGACAGCCGGGTTGCCAAC                                                                  |



|                                                             |                |                 |                                                                                             |
|-------------------------------------------------------------|----------------|-----------------|---------------------------------------------------------------------------------------------|
| str. A3                                                     |                |                 |                                                                                             |
| Thermoanaerobacter<br>mathranii subsp. mathranii<br>str. A3 | CP002032.1     | 2041185-2041271 | TTATGAGAGAGGCAAACCTACCGAAAGGTAAGGGCGCAAAGCTACAGGTCTGAGTCATGCAGATGCTATGACGGCTGGGTTGCCAAT     |
| Thermoanaerobacter<br>mathranii subsp. mathranii<br>str. A3 | CP002032.1     | 2214234-2214145 | TGGCGTTAAAGGCAAACCCATTGAAAAATGGGGACGTAAAGCTACAGGGTCTAAGGTGCCCCACAGGCACTATGACAGCCTGGCTGCCGCT |
| Thermoanaerobacter<br>pseudethanolicus ATCC<br>33223        | CP000924.1     | 1541170-1541083 | TGTTGAAAAAGGCAAACCTCGTCGAAAGGCGGGGACGCAAAGCCACGGGTCTAAAGCGATAGTTTGTCTATGATAGCCGGGCTGCCAAC   |
| Thermoanaerobacter sp.<br>X513                              | CP002210.1     | 763697-763784   | TGTTGAAAAAGGCAAACCTCGTCGAAAGGCGGGGACGCAAAGCCACGGGTCTAAAGCGATAGTTTGTCTATGATAGCCGGGCTGCCAAC   |
| Thermoanaerobacter sp.<br>X514                              | CP000923.1     | 2190645-2190558 | TGTTGAAAAAGGCAAACCTCGTCGAAAGGCGGGGACGCAAAGCCACGGGTCTAAAGCGATAGTTTGTCTATGATAGCCGGGCTGCCAAC   |
| Thermoanaerobacter sp.<br>X561 ctg62                        | ACXP02000002.1 | 787740-787653   | TGTTGAAAAAGGCAAACCTCGTCGAAAGGCGGGGACGCAAAGCCACGGGTCTAAAGCGATAGTTTGTCTATGATAGCCGGGCTGCCAAC   |
| Thermoanaerobacter<br>tengcongensis MB4                     | AE008691.1     | 706140-706227   | CTTCGATAAGGGCAAACCCGTCGAAAGGCGGGGCGCAAAGCCACGGGCCTAAATCCCTGATTGGGACATGGTAGCCGGGCTGCCGAA     |
| Thermoanaerobacter<br>wiegelii Rt8.B1                       | CP002991.1     | 948288-948375   | TGCTGAAAAAGGCAAACCTCGTCGAAAGGCGGGGACGCAAAGCTACGGGTCTAATGCAACAGTTTGTCTATGATAGCCGGGTACCAAC    |
| Thermoanaerobacterium<br>xylanolyticum LX-11                | CP002739.1     | 2097303-2097218 | ACTTGAAAAGAGCAAACCTTATCGAAAGATAAGGACGCAAAGCCACGGGTCTAAAGCAGATTCTGCTAAGATGGCCGGGTTGCCAGC     |
|                                                             |                |                 |                                                                                             |
| Thermobacillus composti<br>KWC4 ctg146                      | AGFE01000025.1 | 68011-68098     | ATCAGCAAAGGGCAAACCTTGTCGAAAGGCAAGGACGCAAAGCTAAGGGTCTACGGCTCCGCACGAGCTATGATCGCCTGGTTACCGGG   |

|                                                        |                |                 |                                                                                                                                      |
|--------------------------------------------------------|----------------|-----------------|--------------------------------------------------------------------------------------------------------------------------------------|
| Thermobacillus composti<br>KWC4 ctg154                 | AGFE01000013.1 | 14027-14110     | AGCTGATAAAGGCAAACCATATGAAAATATGGGACGCAAAGCTACGGGTCTAAGGCGGAATGCTATGACAGCCGGGCTGCCGGA                                                 |
| Thermobacillus composti<br>KWC4 ctg157                 | AGFE01000012.1 | 86144-86271     | TTGGGATCAAGGCAACCTGCGCGAAAGCGCAAGGGCGCAAAGCTACAGGGGCTAATCGGCGGGATGGACCGGACCTCCGCAATTCGGGCGGACGGGC<br>GGTTCGCGCCGGATGCCAGCCAGCTGCCGAA |
| Thermobacillus composti<br>KWC4 ctg160                 | AGFE01000005.1 | 138345-138242   | AAAGAAAAGAGGTAAACCCGTACGAAAGTCGGGGACGCAAAGCCACGGGTCTAAAGCGTGGGACTATGACGTCCGGATCACGCCATGACAGCCGGGC<br>TGCTCTA                         |
|                                                        |                |                 |                                                                                                                                      |
| Thermobaculum terrenum<br>ATCC BAA-798<br>chromosome 1 | CP001825.1     | 394631-394557   | CCCAGAAAAGGGCAAACCCGTCTGTGAGATGGGGACGCAAAGCCACGGGACTCTAAGAGTCAGCCGGGCTGCCTGG                                                         |
| Thermobaculum terrenum<br>ATCC BAA-798<br>chromosome 2 | CP001826.1     | 961185-961111   | CCCAGAAAAGGGCAAACCTGTGCGGAGGCAGGGGCGCAAAGCCACGGAGCTCTCGAAGCTAGCCGGGCTGCCTGG                                                          |
|                                                        |                |                 |                                                                                                                                      |
| Thermosediminibacter<br>oceansi DSM 16646              | CP002131.1     | 1935923-1935836 | CCCTGTAAAGGGCAAACCCGGTGAAAGCCGGGGGCGCAAAGCTACGGGCCTAAGGGTAATAAAGCCTATCGGCCGCCGGGCTGCCGGG                                             |
| Thermosediminibacter<br>oceansi DSM 16646              | CP002131.1     | 1748978-1748891 | CAGCGAAAAGGGCAAACCTACCGAAAGGTGGGGGCGCAAAGCCATAGGGTCTAAGGTGCTTTTGCACTATGACAGCCTGGTTGCCGCT                                             |
| Thermosediminibacter<br>oceansi DSM 16646              | CP002131.1     | 1606753-1606665 | CAGAGAAAAGGGTAAACTCAATGAAAGGTAGGGGTGCAAAAGCCATAGGGTCTAAGGTGCATTACATTATAACAGCATGGCTGCCGCT                                             |
| Thermosediminibacter<br>oceansi DSM 16646              | CP002131.1     | 472224-472131   | GCCGATAAAAGGGCAAACCTGTGCGAAAGGCAGGGGCGCAAAGCCATGGGCCTACGGCTCCATTGATGATGGAGCTACGGCTGCCAGGTTGCCGGC                                     |
| Thermosediminibacter<br>oceansi DSM 16646              | CP002131.1     | 2216288-2216203 | TATACCAAAGTGCAAACCAGCCGAAAAGCTGGAGTGCCAAGCTGCGGATATAAAGCTTTTAATGCTATGGTAGCCGGGCTGCCGAT                                               |
| Thermosediminibacter                                   | CP002131.1     | 1785307-1785219 | TTCCGTCAAGGGCAAACCGTCGAAAGGTAGGGACGCAAAGCCACGGGCCTACGAAGAGACAAGCTCTTCATAGCAGCCGGGCTGCCGGG                                            |

|                                            |                |                 |                                                                                              |
|--------------------------------------------|----------------|-----------------|----------------------------------------------------------------------------------------------|
| oceani DSM 16646                           |                |                 |                                                                                              |
| Thermosinus<br>carboxydivorans Nor1 ctg43  | AAWL01000017.1 | 11338-11251     | ACATAAGTTGGGCAAACCCGGCGAAAGCCGGGGACGCAAAGCCATGGGTCTAAGGACATTGGGTGTCTATGATCGCCAGGTTGCCAAT     |
| Thermosinus<br>carboxydivorans Nor1 ctg45  | AAWL01000008.1 | 69995-70080     | CTGAATATTGGGCAAACCCGTCGAAAGGCGGGGACGCAAAGCTAAAGGGTCTAAGGACTTCGTGTCTATGATTGCCAGCTGCCGGT       |
| Thermosinus<br>carboxydivorans Nor1 ctg53  | AAWL01000002.1 | 59937-60025     | ATTATCCAAGGGCAAACCTGTGCGAAAGGCAGGGACGCAAAGCCAAGGGCCTAAGGAATAGAAATTATTCTATGGCAGCCGGTTGCATGA   |
| Thermovirga lienii DSM<br>17291            | CP003096.1     | 134111-134022   | AGCTGACAAGGGCAAAGCAGGCGAAAGCCTGCGGCGCAAAGCCCAGGGTCTAAGGCGCACATTTTCGCGCTATGACAGCCTGGCTGCCGGC  |
| Thermovirga lienii DSM<br>17291            | CP003096.1     | 1717110-1717196 | AACCCGAAAGGGCAAAACCGTCGAAAGGCGGCGACGCAAAGCCGAGGGTCTAAAGCCTTTAAAGGCCATGACAGCCAGGCTGCCGAA      |
| Thermovirga lienii DSM<br>17291            | CP003096.1     | 1716907-1716993 | AATCCGAAAGGGCAAAACCGCCGAAAGGCGGTGGCGCAAAGCCAAGGGTCTAAAGCCTTTAAAGGCCATGACAGCCAGGCTGCCGAA      |
| Thioalkalivibrio<br>sulfidophilus HL-EbGr7 | CP001339.1     | 2479059-2479143 | TCTCGACAAAGGCATACCCAGCCGAAAGGCGGGGACGCAAAGCTACCGGTCTACGGGACTTTCCACGACAGCGGGGTTACCGAA         |
| Thioalkalivibrio<br>sulfidophilus HL-EbGr7 | CP001339.1     | 1221167-1221084 | AAACGACAAGGGCATACCCGACCGAAAGGCGGGGACGCAAAACCACCGGTCTACGGCAAACGCCACGACAGCGGAGTTACCGAA         |
| Thioalkalivibrio<br>sulfidophilus HL-EbGr7 | CP001339.1     | 3208761-3208679 | ACAGGACAAAGGCAAAACCCGTCGAAAGGCGGGGACGCAAAGCCACCGGTCTACGGAACATCCAAGACAGCGGGGTTGCCAC           |
| Thioalkalivibrio<br>sulfidophilus HL-EbGr7 | CP001339.1     | 1219780-1219697 | TCATCGAAAGGGCATACCCGACCGAAAGGCGGGGACGCAAAACCACCGGTCTACGGCTTCGGCCATGACAGCGGAGTTACCGAA         |
| Thioalkalivibrio                           | AGFB01000006.1 | 139895-139987   | TCGAGACAAAGGTAAACCCGTCGCAAGGCGGGGACACAAAGCCGCCGGTCCCCGATTCAAGAACGACAATGGGGGACAGCGGGGCTGCCGCT |

|                                             |                |                 |                                                                                                |
|---------------------------------------------|----------------|-----------------|------------------------------------------------------------------------------------------------|
| thiocyanoxidans ARh 4<br>ctg49              |                |                 |                                                                                                |
| Thiobacillus denitrificans<br>ATCC 25259    | CP000116.1     | 532900-532975   | ATCCCCGAAAGGGCAAACCCGCCGCGAGGCGGGGGCGCAAAGCGACCGGTCTCGAAAGAGATAGCGGCGCTGCCGTG                  |
| Thiocapsa marina 5811<br>ctg455             | AFWV01000020.1 | 58886-58979     | TAAGCGAAAGGCCAAACCTACCGAGAGGTAGGGGCGGAAAGTCGCGGATCCTAAGATCCCGGATTCTGGGATCAAGGACAGCCGGACTGCCGAG |
| Thiomicrospira crunogena<br>XCL-2           | CP000109.2     | 1051066-1051149 | ATGTAGATTTGCCAAACTTACTGTGAAGTAAGGACGGAAAGCCACGGGTCTTTGTCATCAAATAAAGATAGCCGGGTTGCGTAG           |
| Thiomicrospira crunogena<br>XCL-2           | CP000109.2     | 325943-326021   | AGAAAATTTGCCAAACTTGTGTGAAGCAAGGACGGAAAGCCATGGGTCTCAATGGTTGAGATCGCCAGGTTGCCAAA                  |
| Thiomicrospira crunogena<br>XCL-2           | CP000109.2     | 1048651-1048725 | ATTTGATAAAGCTAAATTCGTGCGGAGGCGAAGACAGAAAGCCACGGATCTCCCTGAGATGGCCGGGTTACCTTT                    |
| Thiomicrospira crunogena<br>XCL-2           | CP000109.2     | 326120-326199   | GTTTTTAATTGCCAAACTTGTGTGAAGCAGGGACGGAAAGCCATGGGTCTCAATGTTTGGAGATCGCCAGGTTGCATAC                |
| Tolumonas auensis DSM<br>9187               | CP001616.1     | 1034201-1034287 | CTCCCGAAACGGCAAACCTCCGGGTAACCGGATGTACGCAAAGCCACAGGTCCTTTTGAGTCATCATCAGGACAGCTGAGCTACCGAA       |
| Turicibacter sanguinis<br>PC909 contig00032 | ADMN01000047.1 | 7214-7128       | AAATTTTATAGGCAAATTTGGAGAAATCCAAGACGCAAAGCTAAAGGGGCTAAGGTCAATCGAGACTATGCTAGCCAGTTGCCGAA         |
| Turicibacter sanguinis<br>PC909 contig00107 | ADMN01000030.1 | 91543-91459     | CAATCAAATAGACAAACTTAAGGAAATTTAAGGACGCCAAGCTACAGGGCTTAAGTCAAGATGATGATGCTAGCTAGTTGCCATA          |

|                                                                       |                |               |                                                                                                                         |
|-----------------------------------------------------------------------|----------------|---------------|-------------------------------------------------------------------------------------------------------------------------|
| Turicibacter sp. HGF1<br>contig00066                                  | AEXQ01000078.1 | 7191-7105     | AAATTTTATAGGCAAATTTGGAGAAATCCAAAGACGCAAAGCTAAAGGGGCTAAGGTCAATTGAGACTATGCTAGCCAGTTGCCGAA                                 |
| Turicibacter sp. HGF1<br>contig00089                                  | AEXQ01000012.1 | 51729-51645   | CAATCAAATAGACAAACTTAAGGAAATTTAAGGACGCCAAGCTACAGGGCTTAACTCAAGATGATGATGCTAGCTAGTTGCCATA                                   |
| Uncultured bacterium 9F08<br>genomic fragment.                        | GU177851.1     | 4045-3951     | ATTCCCCTTGGTAAACCTGCACGAAAGTCGGGGACACAAAGTTACCGGTCTAAGGGGCATATATACTATGCCCTATGACAGCGGGATTGCCGGA                          |
| Uncultured bacterium clone<br>pSM9 penicillin-binding<br>protein gene | DQ898548.1     | 1361-1448     | CCCGTTTCAGGGCAAACCTCACCGAAAGGTGGGGACGCAAAGCCTCCGGTCTACGGGACGCATGTGCCTATGACAGCGGGTTGCCGGT                                |
| Uncultured Clostridium sp.<br>TS28_contig59277                        | ADJS01005390.1 | 1670-1580     | GGGAATATTGGGCAAACCCAGTGAAAGCTGGTGACGCAAAGCTATAGGGTCTACGTTTCTCCGCACGGAAGCATGACAGCCAGTTGCAGCA                             |
| Uncultured Clostridium sp.<br>TS29_contig117344                       | ADJT01003581.1 | 2726-2613     | ATTAAATATTGGCAAACCTATTTGAAAAAATAGGTCGCAAAGCTTTAGAGACTAAGTTGACCATTATAAGCAATATGCTTTTATGGAAGTTTCAATATGTCA<br>GTCAGCTGCCTCC |
| Uncultured Clostridium sp.<br>TS29_contig16032                        | ADJT01002700.1 | 296-211       | AAGTTTAAAAGGCAAACCTGCCGAAAGACAGGGACGCAAAGCCAAGGGTCTAAGGTCCGTATGGACTATGACAGCCGGTTGCCGCA                                  |
| Uncultured<br>Desulfo bacterium sp.<br>genomic DNA                    | FR695874.1     | 304930-305040 | TTCTGATAAAGCCAAACTGCCTGTGATCTTAAACTAAATTGATCTTTTATAGAAAAAAGGCAGAACGGGAAGCCACGGGTTCTCAAAGAAAGAATAGC<br>CGGGTTGCCAGA      |
| Uncultured Dorea sp.<br>TS28_contig06379                              | ADJS01006855.1 | 390-303       | TTATTCATAGGGCAAACCTGTTGAAAGACAGGGACGCAAAGCCAGAAGGGTCTAAGGTCTTATTGGACTATGACAGCCGGTTGCCACA                                |

|                                                         |                |             |                                                                                                    |
|---------------------------------------------------------|----------------|-------------|----------------------------------------------------------------------------------------------------|
| Uncultured Eubacterium sp.<br>TS28_contig06066          | ADJS01007775.1 | 25128-25046 | TGTTCTAGTGGGCAAACCTTGTGAAAGCAGGGGACGCAAAGCCAAGGGTCTAAGGGCATAGCCTATGACAGCCGGTTGCCGCG                |
| Uncultured Eubacterium sp.<br>TS28_contig185480         | ADJS01009048.1 | 1948-2023   | GAAAATAATTGGCAAAGCAGACGAAAGTCTGTGACGCAAAGCTACAGGGCCTGTAAAATGGCAGCCAGTTGCATAA                       |
| Uncultured Eubacterium sp.<br>TS28_contig197515         | ADJS01009351.1 | 4318-4412   | TTTATATTTGGGTAAAACTGTCTGAAAGGCAGCGACACAAAGCCAAATGGGTCTAAGGTTCAATTTTTTAAGAGAATTATGACAGCCGGTTGCATCA  |
| Uncultured Eubacterium sp.<br>TS28_contig44402          | ADJS01008438.1 | 4304-4393   | CTGAGAAATAGGCAAACCCGTCGAAAGACGGGGACGCAAAGCCAGAAGGGTCTAAAGCGGCGAAAGCTGCAATGACAGCCGGTTGCAAGC         |
| Uncultured<br>Faecalibacterium sp.<br>TS28_contig08302  | ADJS01010440.1 | 217-143     | AAATGCTATCGGCAAACCCGGCGCAAGCCGGCGGCGCAAAGCTACAGGGACCCATTGGGTCAGCCAGCTGCAATC                        |
| Uncultured<br>Faecalibacterium sp.<br>TS28_contig178696 | ADJS01012342.1 | 19372-19278 | GCAATTTTTTGGCAAACCTTGTCTGAAAGGCAAGGACGCAAAGCCATAGGGGCTAAGGTTCTGGGGCATTTCCCGGATGATGCCAGCCGGTTGCTTCC |
| Uncultured<br>Faecalibacterium sp.<br>TS28_contig181382 | ADJS01012479.1 | 956-1044    | TGCAGACAAGGGCACGATCGGTGAAAGCCGGTTTCGCAAAGCCAGGGGCTAAACGGAAGACTTTTCCGCATGGCAGCCGGTTCTCTGA           |
| Uncultured<br>Faecalibacterium sp.<br>TS28_contig181382 | ADJS01012479.1 | 726-817     | TACAGATAAAGGCACAGCCGGTGAAAGCCGGTGCCGCAAAGCCAGATGGGCCTAAACGGAGCTTGTCTCCGCATGGCAGCCGGTGCCAAC         |
| Uncultured<br>Faecalibacterium sp.<br>TS28_contig186573 | ADJS01012807.1 | 3734-3659   | GAATATCCTCGGCAAAGCAGTCGAAAGGCTGTGACGCAAAGCTATAGGGCCTGTAAAATGGCAGCCAGTTGCTTCT                       |

|                                                             |                |           |                                                                                                |
|-------------------------------------------------------------|----------------|-----------|------------------------------------------------------------------------------------------------|
| Uncultured<br>Faecalibacterium sp.<br>TS28_contig186573     | ADJS01012807.1 | 3935-3860 | GAATATTCTCGGCAAAACAGTCGAAAGGCTGTGACGCAAAGCTACAGGGCCTGTAAAATGGCAGCCAGCTGCTTCT                   |
| Uncultured<br>Faecalibacterium sp.<br>TS29_contig132743     | ADJT01006955.1 | 9-74      | GGCAAGACAGTCGAAAGGCTGTGACGCAAAGCTATAGGGCCTGTAAAATGGCAGCCAGTTGCTTCT                             |
| Uncultured<br>Faecalibacterium sp.<br>TS29_contig142890     | ADJT01007769.1 | 7522-7613 | CTTAATACTTGGTAAACCTACCGAAAGATAGGGCAACAAAGCTAAATGAGTCTAAAATCTCATATACGAGGTCATGGCAGCTGGTTGCTTTT   |
|                                                             |                |           |                                                                                                |
| Uncultured<br>Ruminococcaceae bacterium<br>TS28_contig09421 | ADJS01015797.1 | 2218-2143 | TTCATAAACCGGCAAAGCAGTCGAAAGGCTGTGACGCAAAGCTATAGGGCCTGTAAAATGGCAGCCAGTTGCACCT                   |
| Uncultured Ruminococcus<br>sp. TS28_contig09634             | ADJS01017175.1 | 1544-1624 | TTTAAAAAAGGCATAGCCGGGGAAATCCGGTGGCGCAAACTATAGGGTCTAAGCAAATGTATGACAGCCAGTTGCAGGA                |
| Uncultured Ruminococcus<br>sp. TS28_contig163554            | ADJS01019394.1 | 465-540   | ATACAGTATCGGCAAAACAGTCGAAAGGCTGCGGCGCAAAGCTAAAGGGCCTGTAAAATGGCAGCCAGTTGCATTT                   |
| Uncultured Ruminococcus<br>sp. TS28_contig164519            | ADJS01019441.1 | 69-1      | ACAGCATAAAGGCAAACCTGCTGAAAGGCAGGGACGCAAAGCCACGGGTCTAAGGTCGTGAGACTAAGG                          |
| Uncultured Ruminococcus<br>sp. TS28_contig173278            | ADJS01019690.1 | 4275-4182 | GGCATTTATTGGCAAACCGGTTGAAAAGCCGGGGCGCAAAGCCAGAAGGAGCTAAAGTCAGATTGAAATCTGGCCATGCCAGCCGGTTGCATCA |
| Uncultured Ruminococcus<br>sp. TS28_contig177606            | ADJS01019823.1 | 2162-2237 | AAAGATTCTAGGCAAAACAGACGAAAGTCTGTGACGCAAAGCTAAAGGGCCTGTAAAATGGCAGCCAGTTGTAGAA                   |
| Uncultured Ruminococcus<br>sp. TS28_contig186038            | ADJS01020268.1 | 394-469   | AAAGAATCTCGGCAAAGCAGTCGAAAGGCTGTGACGCAAAGCTACAAGGCCTGTAAAATGGCAGCCAGTTGCGTAA                   |

|                                                  |                |                 |                                                                                                            |
|--------------------------------------------------|----------------|-----------------|------------------------------------------------------------------------------------------------------------|
| Uncultured Ruminococcus<br>sp. TS29_contig00514  | ADJT01008988.1 | 413-338         | AAGGATGATCGGCAAACCAGATGAAAGTCTGGGACGCAAAGCTATAGGGCCTGTAAAATGGTAGCCAGTTGCATGA                               |
| Uncultured Ruminococcus<br>sp. TS29_contig118902 | ADJT01011779.1 | 2006-1913       | GGCATTATTGGCAAACCGGTTGAAAAGCCGGGGCGCAAAGCCAGAAGGAGCTAAAGTCAGATTGAAATCTGGCCATGCCAGCCGGTTGCATCA              |
| Uncultured Ruminococcus<br>sp. TS29_contig126743 | ADJT01012312.1 | 17871-17961     | TTATTTTAAAGGCAAACCTGTTGAAAGGCAGGGACGCAAAGCCAGAAGGGACTAAAGTCAGAAAGCTTGACCATGTCAGCCGGTTGCCACT                |
| Uncultured Ruminococcus<br>sp. TS29_contig136355 | ADJT01012865.1 | 2681-2756       | TAAGAAAATCGGCAAACAGACGAAAGTCTGTGACGCAAAGCTACAGGGCCTGTAAAATGGCAGCCAGTTGCATGA                                |
| Uncultured Ruminococcus<br>sp. TS29_contig139182 | ADJT01013011.1 | 11568-11655     | TATATATAAAGGCAAACCTGTTGAAAGACAGGGACGCAAAGCCATGGGTCTAAGGTCCGAAGGATGACTATGACAGCCGGTTGCCGCA                   |
| Uncultured Ruminococcus<br>sp. TS29_contig18840  | ADJT01010127.1 | 1258-1341       | GTGAATAAAAGGCAAACCTGTTGAAAGACAGGGACGCAAAGCCAAGGGTCTAAGGTCTCAGGACTATGACAGCCGGTTGCCGCA                       |
|                                                  |                |                 |                                                                                                            |
| Vibrio alginolyticus 12G01<br>1100007009578      | AAPS01000039.1 | 21459-21548     | TCACGCACAGGGCAAACCATTCGAAAGAGTGGGACGCAAAGCCTCCGGCCTGAACCATATTACGATATGGAAGGTAGCGGGGTTACCGAT                 |
| Vibrio alginolyticus 12G01<br>1100007009659      | AAPS01000001.1 | 220352-220252   | ATCACATTTTCGGCAAACCATTCGAAAGGGTGGGACGCAAAGCTTCCGGTCTGTCAGCATTTAAAAATCTAAAAGAATGCTCATGATAGCGGGGTTACCA<br>TG |
| Vibrio alginolyticus 40B<br>Cont24               | ACZB01000024.1 | 14116-14216     | ATCACATTTTCGGCAAACCATTCGAAAGGGTGGGACGCAAAGCTTCCGGTCTGTCAGCATTTAAAAATCTAAAAGAATGCTCATGATAGCGGGGTTACCA<br>TG |
| Vibrio alginolyticus 40B<br>Cont70               | ACZB01000069.1 | 74260-74171     | TCACGCACAGGGCAAACCATTCGAAAGAGTGGGACGCAAAGCCTCCGGCCTGAACCATATTACGATATGGAAGGTAGCGGGGTTACCGAT                 |
| Vibrio anguillarum 775<br>chromosome I           | CP002284.1     | 1996187-1996272 | TCACGCACAGGGCAAACCATTTGAAAAGATGGGACGCAAAGCCTCCGGCCTAAACCGACTATTTCGGTAGGTAGCGGGGTTGCCGAT                    |
| Vibrio anguillarum 96F<br>contig00011            | AEZA01000009.1 | 247884-247799   | TCACGCACAGGGCAAACCATTTGAAAAGATGGGACGCAAAGCCTCCGGCCTAAACCGACTATTTCGGTAGGTAGCGGGGTTGCCGAT                    |



|                                                    |                |               |                                                                                                                   |
|----------------------------------------------------|----------------|---------------|-------------------------------------------------------------------------------------------------------------------|
| Vibrio anguillarum RV22<br>contig00057             | AEZB01000056.1 | 34556-34641   | TCACGCACAGGGCAAACCATTTGAAAAGATGGGACGCAAAGCCTCCGGCCTAAACCGACTATTTCGGTAGGTAGCGGGGTTGCCGAT                           |
| Vibrio angustum S14<br>1099604003192               | AAOJ01000002.1 | 319461-319551 | GTCACGAAGTGGCAAATTAATTGAAAAGATTAAGACGCAAAACCAACCGGCCTAAAAATTATGTTAATAATTCAAGGTAGCGGGGTTACCGAA                     |
| Vibrio brasiliensis LMG<br>20546 VIBR0546_32       | AEVS01000059.1 | 18437-18350   | CTGCACTTCAGGCAAACCTATCCGAAAGGTTAGGACGCAAAGCCACCGGTCTGTCGACACTCGATGTCTATGATAGCGGGGCCCGCT                           |
| Vibrio brasiliensis LMG<br>20546 VIBR0546_61       | AEVS01000091.1 | 2986-3071     | CCACGAACAGGGCAAACCACTCCGAAAGGTTGGGACGCAAAGCCTCCGGCCTTCAACATTTTATGTCAGGTAGCGGGGTTGCCGAT                            |
| Vibrio campbellii DS40M4<br>contig00041            | AGIE01000036.1 | 12296-12385   | TCACGCACAGGGCAAACCATTCGAAAGGTTGGGACGCAAAGCCTCCGGCCTGAACCGTCGAATTAGATGGAAGGTAGCGGGGTTACCGAT                        |
| Vibrio caribbenthicus ATCC<br>BAA-2122 VIBC2010_95 | AEIU01000122.1 | 2635-2721     | CCACGAACAGGGCAAACCATTTTCGAAAGAGTGGGACGCAAAGCCTCCGGCCTTAAACATGATAATGTCTGGTAGCGGGGTTGCCGAT                          |
| Vibrio cholerae 12129(1)<br>VCG.Contig178          | ACFQ01000009.1 | 839950-839844 | GTCACACTTTGGCAAACCCCTTTGAAAAAATGGGACGCAAAGCTTCCGGTCTGTGCGGTCAAGAAAGCTCATAAAGTCCTTTACACCTAGGATAGCGGG<br>GTTACCAAT  |
| Vibrio cholerae 12129(1)<br>VCG.Contig179          | ACFQ01000010.1 | 734747-734661 | TCACGCACAGGGCAAACCATTCGAAAGAGTGGGACGCAAAGCCTCCGGCCTAAACCAGAAGACGTGGTAGGTAGCGGGGTTACCGAT                           |
| Vibrio cholerae 1587<br>gcontig_1103206002954      | AAUR01000056.1 | 3604-3710     | GTCACACTTTGGCAAACCCCTTTGAAAAAATGGGACGCAAAGCTTCCGGTCTGTGCGGTCAAGAAAGCTCATAAAGCCCTTTACACCTAGGATAGCGGG<br>GTTACCAAT  |
| Vibrio cholerae 1587<br>gcontig_1103206003212      | AAUR01000002.1 | 72158-72244   | TCACGCACAGGGCAAACCATTCGAAAGAGTGGGACGCAAAGCCTCCGGCCTAAACCAGAAGACGTGGTAGGTAGCGGGGTTACCGAT                           |
| Vibrio cholerae 2740-80<br>gcontig_1103206066802   | AAUT01000003.1 | 5810-5896     | TCACGCACAGGGCAAACCATTCGAAAGAGTGGGACGCAAAGCCTCCGGCCTAAACCAGAAGACATGGTAGGTAGCGGGGTTACCGAT                           |
| Vibrio cholerae 2740-80<br>gcontig_1103206067204   | AAUT01000081.1 | 11064-10958   | GTCACACTTTGGCAAACCCCTTTGAAAAAATGGGACGCAAAGCTTCCGGTCTGTGCGGTCAAGAAAGCTCATAAAGCCCTATTACACCTAGGATAGCGGG<br>GTTACCAAT |
| Vibrio cholerae 623-39                             | AAWG01000002.1 | 25205-25291   | TCACGCACAGGGCAAACCATTCGAAAGAGTGGGACGCAAAGCCTCCGGCCTAAACCAGAAGACGTGGTAGGTAGCGGGGTTACCGAT                           |

|                                                   |                |                 |                                                                                                                   |
|---------------------------------------------------|----------------|-----------------|-------------------------------------------------------------------------------------------------------------------|
| gcontig_1104444419539                             |                |                 |                                                                                                                   |
| Vibrio cholerae 623-39<br>gcontig_1104444419597   | AAWG01000058.1 | 6725-6831       | GTCACACTTTGGCAAACCCCTTTGAAAAAATGGGACGCAAAGCTTCCGGTCTGTTCGGTCAAGAAAGCTCATAAAGCCCTCTTACACCTAGGATAGCGGG<br>GTTACCAAT |
| Vibrio cholerae AM-19226<br>gcontig_1101953438548 | AATY01000002.1 | 114977-114891   | TCACGCACAGGGCAAACCATTCGAAAGAGTGGGACGCAAAGCCTCCGGCCTAAACCAGAAGACGTGGTAGGTAGCGGGGTTACCGAT                           |
| Vibrio cholerae AM-19226<br>gcontig_1101953438552 | AATY01000001.1 | 2527-2633       | GTCACACTTTGGCAAACCCCTTTGAAAAAATGGGACGCAAAGCTTCCGGTCTGTTCGGTCAAGAAAGCTCATAAAGCACTCTTACACCTAGGATAGCGGG<br>GTTACCAAT |
| Vibrio cholerae B33<br>gcontig_1104196056141      | AAWE01000144.1 | 2848-2742       | GTCACACTTTGGCAAACCCCTTTGAAAAAATGGGACGCAAAGCTTCCGGTCTGTTCGGTCAAGAAAGCTCATAAAGCCCTATTACACCTAGGATAGCGGG<br>GTTACCAAT |
| Vibrio cholerae B33<br>gcontig_1104196062761      | AAWE01000118.1 | 3454-3368       | TCACGCACAGGGCAAACCATTCGAAAGAGTGGGACGCAAAGCCTCCGGCCTAAACCAGAAGACATGGTAGGTAGCGGGGTTACCGAT                           |
| Vibrio cholerae B33<br>VCE.Contig124              | ACHZ01000016.1 | 248017-248123   | GTCACACTTTGGCAAACCCCTTTGAAAAAATGGGACGCAAAGCTTCCGGTCTGTTCGGTCAAGAAAGCTCATAAAGCCCTATTACACCTAGGATAGCGGG<br>GTTACCAAT |
| Vibrio cholerae B33<br>VCE.Contig125              | ACHZ01000017.1 | 1070903-1070989 | TCACGCACAGGGCAAACCATTCGAAAGAGTGGGACGCAAAGCCTCCGGCCTAAACCAGAAGACATGGTAGGTAGCGGGGTTACCGAT                           |
| Vibrio cholerae BJG-01<br>vcoBJG01.contig.155_1   | AFOU01000213.1 | 41348-41434     | TCACGCACAGGGCAAACCATTCGAAAGAGTGGGACGCAAAGCCTCCGGCCTAAACCAGAAGACGTGGTAGGTAGCGGGGTTACCGAT                           |
| Vibrio cholerae BJG-01<br>vcoBJG01.contig.64_2    | AFOU01000085.1 | 43059-43165     | GTCACACTTTGGCAAACCCCTTTGAAAAAATGGGACGCAAAGCCTCCGGTCTGTTCGGTCAAGAAAGCTCATAAAGTCCTCTTACACCTAGGATAGCGGG<br>GTTACCAAT |
| Vibrio cholerae bv. albensis<br>VL426 Contig238   | ACHV01000002.1 | 827242-827136   | GTCACACTTTGGCAAACCCCTTTGAAAAAATGGGACGCAAAGCTTCCGGTCTGTTCGGTCAAGAAAGCTCATAAAGCCCTCTTACACCTAGGATAGCGGG<br>GTTACCAAT |
| Vibrio cholerae bv. albensis<br>VL426 Contig239   | ACHV01000001.1 | 439542-439628   | TCACGCACAGGGCAAACCATTCGAAAGAGTGGGACGCAAAGCCTCCGGCCTAAACCAGAAGACGTGGTAGGTAGCGGGGTTACCGAT                           |
| Vibrio cholerae BX 330286<br>VCF.Contig78         | ACIA01000003.1 | 289201-289095   | GTCACACTTTGGCAAACCCCTTTGAAAAAATGGGACGCAAAGCTTCCGGTCTGTTCGGTCAAGAAAGCTCATAAAGCCCTATTACACCTAGGATAGCGGG<br>GTTACCAAT |

|                                                            |                |                 |                                                                                                                   |
|------------------------------------------------------------|----------------|-----------------|-------------------------------------------------------------------------------------------------------------------|
| Vibrio cholerae BX 330286<br>VCF.Contig96                  | ACIA01000006.1 | 1070688-1070602 | TCACGCACAGGGCAAACCATTCGAAAGAGTGGGACGCAAAGCCTCCGGCCTAAACCAGAAGACATGGTAGGTAGCGGGGTTACCGAT                           |
| Vibrio cholerae CIRS101<br>strain CIRS 101<br>VCH.Contig85 | ACVW01000011.1 | 76131-76045     | TCACGCACAGGGCAAACCATTCGAAAGAGTGGGACGCAAAGCCTCCGGCCTAAACCAGAAGACATGGTAGGTAGCGGGGTTACCGAT                           |
| Vibrio cholerae CIRS101<br>strain CIRS 101<br>VCH.Contig89 | ACVW01000014.1 | 686172-686066   | GTCACACTTTGGCAAACCCCTTTGAAAAAATGGGACGCAAAGCTTCCGGTCTGTTCGGTCAAGAAAGCTCATAAAGCCCTATTACACCTAGGATAGCGGG<br>GTTACCAAT |
| Vibrio cholerae CT 5369-93<br>VIH.Contig345                | ADAL01000127.1 | 2628-2714       | TCACGCACAGGGCAAACCATTCGAAAGAGTGGGACGCAAAGCCTCCGGCCTAAACCAGAAGACGTGGTAGGTAGCGGGGTTACCGAT                           |
| Vibrio cholerae HC-02A1<br>vcoHO2A1.contig.116_3           | AFOT01000135.1 | 49923-50009     | TCACGCACAGGGCAAACCATTCGAAAGAGTGGGACGCAAAGCCTCCGGCCTAAACCAGAAGACGTGGTAGGTAGCGGGGTTACCGAT                           |
| Vibrio cholerae HC-02A1<br>vcoHO2A1.contig.163_2           | AFOT01000201.1 | 47235-47341     | GTCACACTTTGGCAAACCCCTTTGAAAAAATGGGACGCAAAGCTTCCGGTCTGTTCGGTCAAGAAAGCTCATAAAGCCCTCTTACATCTAGGATAGCGGG<br>GTTACCAAT |
| Vibrio cholerae HC-06A1<br>vcoHC06A1.contig.109_2          | AGUI01000118.1 | 49808-49894     | TCACGCACAGGGCAAACCATTCGAAAGAGTGGGACGCAAAGCCTCCGGCCTAAACCAGAAGACATGGTAGGTAGCGGGGTTACCGAT                           |
| Vibrio cholerae HC-06A1<br>vcoHC06A1.contig.53_1           | AGUI01000054.1 | 18311-18417     | GTCACACTTTGGCAAACCCCTTTGAAAAAATGGGACGCAAAGCTTCCGGTCTGTTCGGTCAAGAAAGCTCATAAAGCCCTATTACACCTAGGATAGCGGG<br>GTTACCAAT |
| Vibrio cholerae HC-19A1<br>vcoHC19A1.contig.102_1          | AGUJ01000122.1 | 18315-18421     | GTCACACTTTGGCAAACCCCTTTGAAAAAATGGGACGCAAAGCTTCCGGTCTGTTCGGTCAAGAAAGCTCATAAAGCCCTATTACACCTAGGATAGCGGG<br>GTTACCAAT |
| Vibrio cholerae HC-19A1<br>vcoHC19A1.contig.48_2           | AGUJ01000062.1 | 49879-49965     | TCACGCACAGGGCAAACCATTCGAAAGAGTGGGACGCAAAGCCTCCGGCCTAAACCAGAAGACATGGTAGGTAGCGGGGTTACCGAT                           |
| Vibrio cholerae HC-21A1<br>vcoHC21A1.contig.108_1          | AGUK01000119.1 | 121693-121779   | TCACGCACAGGGCAAACCATTCGAAAGAGTGGGACGCAAAGCCTCCGGCCTAAACCAGAAGACATGGTAGGTAGCGGGGTTACCGAT                           |
| Vibrio cholerae HC-21A1                                    | AGUK01000064.1 | 18309-18415     | GTCACACTTTGGCAAACCCCTTTGAAAAAATGGGACGCAAAGCTTCCGGTCTGTTCGGTCAAGAAAGCTCATAAAGCCCTATTACACCTAGGATAGCGGG              |

|                                                   |                |               |                                                                                                                   |
|---------------------------------------------------|----------------|---------------|-------------------------------------------------------------------------------------------------------------------|
| vcoHC21A1.contig.60_1                             |                |               | GTTACCAAT                                                                                                         |
| Vibrio cholerae HC-22A1<br>vcoHC22A1.contig.47_1  | AGUL01000063.1 | 18307-18413   | GTCACACTTTGGCAAACCCCTTTGAAAAAATGGGACGCAAAGCTTCCGGTCTGTCTGGTCAAGAAAGCTCATAAAGCCCTATTACACCTAGGATAGCGGG<br>GTTACCAAT |
| Vibrio cholerae HC-22A1<br>vcoHC22A1.contig.79_1  | AGUL01000104.1 | 121691-121777 | TCACGCACAGGGCAAACCATTCGAAAGAGTGGGACGCAAAGCCTCCGGCCTAAACCAGAAGACATGGTAGGTAGCGGGGTTACCGAT                           |
| Vibrio cholerae HC-23A1<br>vcoHC23A1.contig.10    | AGUM01000011.1 | 276151-276237 | TCACGCACAGGGCAAACCATTCGAAAGAGTGGGACGCAAAGCCTCCGGCCTAAACCAGAAGACATGGTAGGTAGCGGGGTTACCGAT                           |
| Vibrio cholerae HC-23A1<br>vcoHC23A1.contig.9     | AGUM01000010.1 | 653247-653141 | GTCACACTTTGGCAAACCCCTTTGAAAAAATGGGACGCAAAGCTTCCGGTCTGTCTGGTCAAGAAAGCTCATAAAGCCCTATTACACCTAGGATAGCGGG<br>GTTACCAAT |
| Vibrio cholerae HC-28A1<br>vcoHC28A1.contig.101_1 | AGUN01000124.1 | 121695-121781 | TCACGCACAGGGCAAACCATTCGAAAGAGTGGGACGCAAAGCCTCCGGCCTAAACCAGAAGACATGGTAGGTAGCGGGGTTACCGAT                           |
| Vibrio cholerae HC-28A1<br>vcoHC28A1.contig.56_1  | AGUN01000058.1 | 18311-18417   | GTCACACTTTGGCAAACCCCTTTGAAAAAATGGGACGCAAAGCTTCCGGTCTGTCTGGTCAAGAAAGCTCATAAAGCCCTATTACACCTAGGATAGCGGG<br>GTTACCAAT |
| Vibrio cholerae HC-32A1<br>vcoHC32A1.contig.37_2  | AGUO01000048.1 | 49859-49945   | TCACGCACAGGGCAAACCATTCGAAAGAGTGGGACGCAAAGCCTCCGGCCTAAACCAGAAGACATGGTAGGTAGCGGGGTTACCGAT                           |
| Vibrio cholerae HC-32A1<br>vcoHC32A1.contig.92_1  | AGUO01000111.1 | 18311-18417   | GTCACACTTTGGCAAACCCCTTTGAAAAAATGGGACGCAAAGCTTCCGGTCTGTCTGGTCAAGAAAGCTCATAAAGCCCTATTACACCTAGGATAGCGGG<br>GTTACCAAT |
| Vibrio cholerae HC-33A2<br>vcoHC33A2.contig.40_2  | AGUP01000049.1 | 49847-49933   | TCACGCACAGGGCAAACCATTCGAAAGAGTGGGACGCAAAGCCTCCGGCCTAAACCAGAAGACATGGTAGGTAGCGGGGTTACCGAT                           |
| Vibrio cholerae HC-33A2<br>vcoHC33A2.contig.75_1  | AGUP01000102.1 | 18307-18413   | GTCACACTTTGGCAAACCCCTTTGAAAAAATGGGACGCAAAGCTTCCGGTCTGTCTGGTCAAGAAAGCTCATAAAGCCCTATTACACCTAGGATAGCGGG<br>GTTACCAAT |
| Vibrio cholerae HC-38A1<br>vcoHC30A1.contig.134_1 | AFOV01000164.1 | 18301-18407   | GTCACACTTTGGCAAACCCCTTTGAAAAAATGGGACGCAAAGCTTCCGGTCTGTCTGGTCAAGAAAGCTCATAAAGCCCTATTACACCTAGGATAGCGGG<br>GTTACCAAT |
| Vibrio cholerae HC-38A1<br>vcoHC30A1.contig.63_2  | AFOV01000072.1 | 49847-49933   | TCACGCACAGGGCAAACCATTCGAAAGAGTGGGACGCAAAGCCTCCGGCCTAAACCAGAAGACATGGTAGGTAGCGGGGTTACCGAT                           |

|                                                   |                |               |                                                                                                                   |
|---------------------------------------------------|----------------|---------------|-------------------------------------------------------------------------------------------------------------------|
| Vibrio cholerae HC-40A1<br>vcoHC40A1.contig.167_1 | AFOK01000206.1 | 122404-122490 | TCACGCACAGGGCAAACCATTCGAAAGAGTGGGACGCAAAGCCTCCGGCCTAAACCAGAAGACATGGTAGGTAGCGGGGTTACCGAT                           |
| Vibrio cholerae HC-40A1<br>vcoHC40A1.contig.61_1  | AFOK01000081.1 | 12000-12106   | GTCACACTTTGGCAAACCCTTTGAAAAAATGGGACGCAAAGCTTCCGGTCTGTCTCGGTCAAGAAAGCTCATAAAGCCCTATTACACCTAGGATAGCGGG<br>GTTACCAAT |
| Vibrio cholerae HC-43A1<br>vcoHC43A1.contig.16    | AGUQ01000017.1 | 653087-652981 | GTCACACTTTGGCAAACCCTTTGAAAAAATGGGACGCAAAGCTTCCGGTCTGTCTCGGTCAAGAAAGCTCATAAAGCCCTATTACACCTAGGATAGCGGG<br>GTTACCAAT |
| Vibrio cholerae HC-43A1<br>vcoHC43A1.contig.17    | AGUQ01000018.1 | 278535-278621 | TCACGCACAGGGCAAACCATTCGAAAGAGTGGGACGCAAAGCCTCCGGCCTAAACCAGAAGACATGGTAGGTAGCGGGGTTACCGAT                           |
| Vibrio cholerae HC-48A1<br>vcoHC48A1.contig.181_1 | AFOL01000209.1 | 121685-121771 | TCACGCACAGGGCAAACCATTCGAAAGAGTGGGACGCAAAGCCTCCGGCCTAAACCAGAAGACATGGTAGGTAGCGGGGTTACCGAT                           |
| Vibrio cholerae HC-48A1<br>vcoHC48A1.contig.64_1  | AFOL01000083.1 | 12007-12113   | GTCACACTTTGGCAAACCCTTTGAAAAAATGGGACGCAAAGCTTCCGGTCTGTCTCGGTCAAGAAAGCTCATAAAGCCCTATTACACCTAGGATAGCGGG<br>GTTACCAAT |
| Vibrio cholerae HC-48B2<br>vcoHC48B2.contig.144_1 | AGUR01000163.1 | 31932-32018   | TCACGCACAGGGCAAACCATTCGAAAGAGTGGGACGCAAAGCCTCCGGCCTAAACCAGAAGACATGGTAGGTAGCGGGGTTACCGAT                           |
| Vibrio cholerae HC-48B2<br>vcoHC48B2.contig.49_1  | AGUR01000066.1 | 12004-12110   | GTCACACTTTGGCAAACCCTTTGAAAAAATGGGACGCAAAGCTTCCGGTCTGTCTCGGTCAAGAAAGCTCATAAAGCCCTATTACACCTAGGATAGCGGG<br>GTTACCAAT |
| Vibrio cholerae HC-49A2<br>vcoHC49A2.contig.17    | AFOM01000018.1 | 278193-278279 | TCACGCACAGGGCAAACCATTCGAAAGAGTGGGACGCAAAGCCTCCGGCCTAAACCAGAAGACATGGTAGGTAGCGGGGTTACCGAT                           |
| Vibrio cholerae HC-49A2<br>vcoHC49A2.contig.9     | AFOM01000010.1 | 319891-319997 | GTCACACTTTGGCAAACCCTTTGAAAAAATGGGACGCAAAGCTTCCGGTCTGTCTCGGTCAAGAAAGCTCATAAAGCCCTATTACACCTAGGATAGCGGG<br>GTTACCAAT |
| Vibrio cholerae HC-61A1<br>vcoHC61A1.contig.3     | AGUS01000004.1 | 320785-320891 | GTCACACTTTGGCAAACCCTTTGAAAAAATGGGACGCAAAGCTTCCGGTCTGTCTCGGTCAAGAAAGCTCATAAAGCCCTATTACACCTAGGATAGCGGG<br>GTTACCAAT |
| Vibrio cholerae HC-61A1<br>vcoHC61A1.contig.9     | AGUS01000010.1 | 281448-281534 | TCACGCACAGGGCAAACCATTCGAAAGAGTGGGACGCAAAGCCTCCGGCCTAAACCAGAAGACATGGTAGGTAGCGGGGTTACCGAT                           |
| Vibrio cholerae HC-70A1                           | AFON01000157.1 | 121689-121775 | TCACGCACAGGGCAAACCATTCGAAAGAGTGGGACGCAAAGCCTCCGGCCTAAACCAGAAGACATGGTAGGTAGCGGGGTTACCGAT                           |

|                                                  |                |                 |                                                                                                                    |
|--------------------------------------------------|----------------|-----------------|--------------------------------------------------------------------------------------------------------------------|
| vcoHC70A1.contig.139_1                           |                |                 |                                                                                                                    |
| Vibrio cholerae HC-70A1<br>vcoHC70A1.contig.60_1 | AFON01000071.1 | 18305-18411     | GTCACACTTTGGCAAACCCCTTTGAAAAAATGGGACGCAAAGCTTCCGGTCTGTCTCGGTCAAGAAAGCTCATAAAGCCCTATTACACCTAGGATAGCGGG<br>GTTACCAAT |
| Vibrio cholerae HCUF01<br>vcoHCUF01.contig.18    | AFOO01000017.1 | 641313-641207   | GTCACACTTTGGCAAACCCCTTTGAAAAAATGGGACGCAAAGCTTCCGGTCTGTCTCGGTCAAGAAAGCTCATAAAGCCCTATTACACCTAGGATAGCGGG<br>GTTACCAAT |
| Vibrio cholerae HCUF01<br>vcoHCUF01.contig.19    | AFOO01000018.1 | 278540-278626   | TCACGCACAGGGCAAACCATTCGAAAGAGTGGGACGCAAAGCCTCCGGCCTAAACCAGAAGACATGGTAGGTAGCGGGGTTACCGAT                            |
| Vibrio cholerae HE-09<br>vcoHE09.contig.143_1    | AFOP01000172.1 | 79925-80011     | TCACGCACAGGGCAAACCATTCGAAAGAGTGGGACGCAAAGCCTCCGGCCTAAACCAGAAGACGTGGTAGGTAGCGGGGTTACCGAT                            |
| Vibrio cholerae HE39<br>vcoHE39.contig.8         | AFOQ01000008.1 | 321581-321475   | GTCACACTTTGGCAAACCCCTTTGAAAAAATGGGACGCAAAGCTTCCGGTCTGTCTCGGTCAAGAAAGCTCATAAAGCCCTCTTACATCTAGGATAGCGGG<br>GTTACCAAT |
| Vibrio cholerae HE39<br>vcoHE39.contig.9         | AFOQ01000009.1 | 1091825-1091911 | TCACGCACAGGGCAAACCATTCGAAAGAGTGGGACGCAAAGCCTCCGGCCTAAACCAGAAGACGTGGTAGGTAGCGGGGTCACCGAT                            |
| Vibrio cholerae HE48<br>vcoHE48.contig.14        | AFOR01000015.1 | 268838-268924   | TCACGCACAGGGCAAACCATTCGAAAGAGTGGGACGCAAAGCCTCCGGCCTAAACCAGAAGACGTGGTAGGTAGCGGGGTTACCGAT                            |
| Vibrio cholerae HE48<br>vcoHE48.contig.4         | AFOR01000005.1 | 828904-828798   | GTCACACTTTGGCAAACCCCTTTGAAAAAATGGGACGCAAAGCTTCCGGTCTGTCTCGGTCAAGAAAGCTCATAAAGCCCTCTTACACCTAGGATAGCGGG<br>GTTGCCAAT |
| Vibrio cholerae HFU-02<br>vcoHFU02.contig.40_2   | AFOS01000056.1 | 49781-49867     | TCACGCACAGGGCAAACCATTCGAAAGAGTGGGACGCAAAGCCTCCGGCCTAAACCAGAAGACATGGTAGGTAGCGGGGTTACCGAT                            |
| Vibrio cholerae HFU-02<br>vcoHFU02.contig.99_1   | AFOS01000130.1 | 18305-18411     | GTCACACTTTGGCAAACCCCTTTGAAAAAATGGGACGCAAAGCTTCCGGTCTGTCTCGGTCAAGAAAGCTCATAAAGCCCTATTACACCTAGGATAGCGGG<br>GTTACCAAT |
| Vibrio cholerae INDRE 91/1<br>VIG.Contig303      | ADAK01000048.1 | 2725-2831       | GTCACACTTTGGCAAACCCCTTTGAAAAAATGGGACGCAAAGCTTCCGGTCTGTCTCGGTCAAGAAAGCTCATAAAGCCCTATTACACCTAGGATAGCGGG<br>GTTACCAAT |
| Vibrio cholerae INDRE 91/1<br>VIG.Contig313      | ADAK01000056.1 | 255725-255811   | TCACGCACAGGGCAAACCATTCGAAAGAGTGGGACGCAAAGCCTCCGGCCTAAACCAGAAGACATGGTAGGTAGCGGGGTTACCGAT                            |

|                                                |                |                 |                                                                                                                   |
|------------------------------------------------|----------------|-----------------|-------------------------------------------------------------------------------------------------------------------|
| Vibrio cholerae LMA3894-4<br>chromosome I      | CP002555.1     | 1730416-1730502 | TCACGCACAGGGCAAACCATTCGAAAGAGTGGGACGCAAAGCCTCCGGCCTAAACCAGAAGACGTGGTAGGTAGCGGGGTACCGAT                            |
| Vibrio cholerae LMA3894-4<br>chromosome II     | CP002556.1     | 639801-639907   | GTCACACTTTGGCAAACCCCTTTGAAAAAATGGGACGCAAAGCTTCCGGTCTGTCTGGTCAAGAAAGCTCATAAAGTCCTTTACACCTAGGATAGCGGG<br>GTTACCAAT  |
| Vibrio cholerae M66-2<br>chromosome I          | CP001233.1     | 1807824-1807910 | TCACGCACAGGGCAAACCATTCGAAAGAGTGGGACGCAAAGCCTCCGGCCTAAACCAGAAGACATGGTAGGTAGCGGGGTACCGAT                            |
| Vibrio cholerae M66-2<br>chromosome II         | CP001234.1     | 729240-729346   | GTCACACTTTGGCAAACCCCTTTGAAAAAATGGGACGCAAAGCTTCCGGTCTGTCTGGTCAAGAAAGCTCATAAAGCCCTTTACACCTAGGATAGCGGG<br>GTTACCAAT  |
| Vibrio cholerae MAK 757<br>cont1.11            | AAUS02000011.1 | 440458-440564   | GTCACACTTTGGCAAACCCCTTTGAAAAAATGGGACGCAAAGCTTCCGGTCTGTCTGGTCAAGAAAGCTCATAAAGCCCTTTACACCTAGGATAGCGGG<br>GTTACCAAT  |
| Vibrio cholerae MAK 757<br>cont1.5             | AAUS02000005.1 | 126675-126589   | TCACGCACAGGGCAAACCATTCGAAAGAGTGGGACGCAAAGCCTCCGGCCTAAACCAGAAGACATGGTAGGTAGCGGGGTACCGAT                            |
| Vibrio cholerae MJ-1236<br>chromosome 1        | CP001485.1     | 1806545-1806459 | TCACGCACAGGGCAAACCATTCGAAAGAGTGGGACGCAAAGCCTCCGGCCTAAACCAGAAGACATGGTAGGTAGCGGGGTACCGAT                            |
| Vibrio cholerae MJ-1236<br>chromosome 2        | CP001486.1     | 590578-590472   | GTCACACTTTGGCAAACCCCTTTGAAAAAATGGGACGCAAAGCTTCCGGTCTGTCTGGTCAAGAAAGCTCATAAAGCCCTATTACACCTAGGATAGCGGG<br>GTTACCAAT |
| Vibrio cholerae MO10<br>cont1.29               | AAKF03000029.1 | 18237-18343     | GTCACACTTTGGCAAACCCCTTTGAAAAAATGGGACGCAAAGCTTCCGGTCTGTCTGGTCAAGAAAGCTCATAAAGCCCTATTACACCTAGGATAGCGGG<br>GTTACCAAT |
| Vibrio cholerae MO10<br>cont1.4                | AAKF03000011.1 | 97017-97103     | TCACGCACAGGGCAAACCATTCGAAAGAGTGGGACGCAAAGCCTCCGGCCTAAACCAGAAGACATGGTAGGTAGCGGGGTACCGAT                            |
| Vibrio cholerae MZO-2<br>gcontig_1104435214482 | AAWF01000029.1 | 2517-2603       | TCACGCACAGGGCAAACCATTCGAAAGAGTGGGACGCAAAGCCTCCGGCCTAAACCAGAAGACGTGGTAGGTAGCGGGGTACCGAT                            |
| Vibrio cholerae MZO-2<br>gcontig_1104435214484 | AAWF01000100.1 | 2245-2139       | GTCACACTTTGGCAAACCCCTTTGAAAAAATGGGACGCAAAGCTTCCGGTCTGTCTGGTCAAGAAAGCTCATAAAGCCCTTTACACCTATGATAGCGGGG<br>TTACCAAT  |
| Vibrio cholerae MZO-3                          | AAUU01000047.1 | 27433-27347     | TCACGCACAGGGCAAACCATTCGAAAGAGTGGGACGCAAAGCCTCCGGCCTAAACCAGAAGACGTGGTAGGTAGCGGGGTACCGAT                            |

|                                                                                         |                |                 |                                                                                                                    |
|-----------------------------------------------------------------------------------------|----------------|-----------------|--------------------------------------------------------------------------------------------------------------------|
| gcontig_1103200937837                                                                   |                |                 |                                                                                                                    |
| Vibrio cholerae MZO-3<br>gcontig_1103200937997                                          | AAUU01000070.1 | 19554-19448     | GTCACACTTTGGCAAACCCCTTTGAAAAAATGGGACGCAAAGCTTCCGGTCTGTCTCGGTCAAGAAAGCTCATAAAGCCCTCTTACACCTAGGATAGCGGG<br>GTTACCAAT |
| Vibrio cholerae NCTC 8457<br>gcontig_1104196174555                                      | AAWD01000198.1 | 2303-2217       | TCACGCACAGGGCAAACCATTCGAAAGAGTGGGACGCAAAGCCTCCGGCCTAAACCAGAAGACATGGTAGGTAGCGGGGTTACCGAT                            |
| Vibrio cholerae NCTC 8457<br>gcontig_1104196176147                                      | AAWD01000128.1 | 3808-3702       | GTCACACTTTGGCAAACCCCTTTGAAAAAATGGGACGCAAAGCTTCCGGTCTGTCTCGGTCAAGAAAGCTCATAAAGCCCTATTACACCTAGGATAGCGGG<br>GTTACCAAT |
| Vibrio cholerae O1 biovar El<br>Tor str. N16961 clone<br>Vc_npcR_4589 non-coding<br>RNA | HQ442188.1     | 8-94            | TCACGCACAGGGCAAACCATTCGAAAGAGTGGGACGCAAAGCCTCCGGCCTAAACCAGAAGACATGGTAGGTAGCGGGGTTACCGAT                            |
| Vibrio cholerae O1 biovar<br>eltor str. N16961<br>chromosome I                          | AE003852.1     | 1860690-1860776 | TCACGCACAGGGCAAACCATTCGAAAGAGTGGGACGCAAAGCCTCCGGCCTAAACCAGAAGACATGGTAGGTAGCGGGGTTACCGAT                            |
| Vibrio cholerae O1 biovar<br>eltor str. N16961<br>chromosome II                         | AE003853.1     | 755256-755362   | GTCACACTTTGGCAAACCCCTTTGAAAAAATGGGACGCAAAGCTTCCGGTCTGTCTCGGTCAAGAAAGCTCATAAAGCCCTATTACACCTAGGATAGCGGG<br>GTTACCAAT |
| Vibrio cholerae O1 str.<br>2010EL-1786 chromosome<br>1                                  | CP003069.1     | 1332090-1332176 | TCACGCACAGGGCAAACCATTCGAAAGAGTGGGACGCAAAGCCTCCGGCCTAAACCAGAAGACATGGTAGGTAGCGGGGTTACCGAT                            |
| Vibrio cholerae O1 str.<br>2010EL-1786 chromosome<br>2                                  | CP003070.1     | 455786-455892   | GTCACACTTTGGCAAACCCCTTTGAAAAAATGGGACGCAAAGCTTCCGGTCTGTCTCGGTCAAGAAAGCTCATAAAGCCCTATTACACCTAGGATAGCGGG<br>GTTACCAAT |
| Vibrio cholerae O1 str.<br>2010EL-1792 contig00014                                      | AELJ01000010.1 | 121619-121705   | TCACGCACAGGGCAAACCATTCGAAAGAGTGGGACGCAAAGCCTCCGGCCTAAACCAGAAGACATGGTAGGTAGCGGGGTTACCGAT                            |



|                                                    |                |                 |                                                                                                                   |
|----------------------------------------------------|----------------|-----------------|-------------------------------------------------------------------------------------------------------------------|
| Vibrio cholerae O1 str.<br>2010EL-1792 contig00094 | AELJ01000077.1 | 218015-217909   | GTCACACTTTGGCAAACCCCTTTGAAAAAATGGGACGCAAAGCTTCCGGTCTGTCTGGTCAAGAAAGCTCATAAAGCCCTATTACACCTAGGATAGCGGG<br>GTTACCAAT |
| Vibrio cholerae O1 str.<br>2010EL-1798 contig00015 | AELI01000014.1 | 121619-121705   | TCACGCACAGGGCAAACCATTCGAAAGAGTGGGACGCAAAGCCTCCGGCCTAAACCAGAAGACATGGTAGGTAGCGGGGTTACCGAT                           |
| Vibrio cholerae O1 str.<br>2010EL-1798 contig00100 | AELI01000084.1 | 18238-18344     | GTCACACTTTGGCAAACCCCTTTGAAAAAATGGGACGCAAAGCTTCCGGTCTGTCTGGTCAAGAAAGCTCATAAAGCCCTATTACACCTAGGATAGCGGG<br>GTTACCAAT |
| Vibrio cholerae O1 str.<br>Amazonia Contig19       | AFSV01000007.1 | 32864-32778     | TCACGCACAGGGCAAACCATTCGAAAGAGTGGGACGCAAAGCCTCCGGCCTAAACCAGAAGACGTGGTAGGTAGCGGGGTTACCGAT                           |
| Vibrio cholerae O1 str.<br>Amazonia Contig2        | AFSV01000029.1 | 311-417         | GTCACACTTTGGCAAACCCCTTTGAAAAAATGGGACGCAAAGCTTCCGGTCTGTCTGGTCAAGAAAGCTCATAAAGCCCTCTTACATCTAGGATAGCGGG<br>GTTACCAAT |
| Vibrio cholerae O395<br>chromosome 1               | CP000626.1     | 469864-469758   | GTCACACTTTGGCAAACCCCTTTGAAAAAATGGGACGCAAAGCTTCCGGTCTGTCTGGTCAAGAAAGCTCATAAAGCACTCTTACACCTAGGATAGCGGG<br>GTTACCAAT |
| Vibrio cholerae O395<br>chromosome 2               | CP000627.1     | 1413802-1413888 | TCACGCACAGGGCAAACCATTCGAAAGAGTGGGACGCAAAGCCTCCGGCCTAAACCAGAAGACGTGGTAGGTAGCGGGGTTACCGAT                           |
| Vibrio cholerae O395<br>chromosome I               | CP001235.1     | 1945221-1945307 | TCACGCACAGGGCAAACCATTCGAAAGAGTGGGACGCAAAGCCTCCGGCCTAAACCAGAAGACGTGGTAGGTAGCGGGGTTACCGAT                           |
| Vibrio cholerae O395<br>chromosome II              | CP001236.1     | 794078-794184   | GTCACACTTTGGCAAACCCCTTTGAAAAAATGGGACGCAAAGCTTCCGGTCTGTCTGGTCAAGAAAGCTCATAAAGCACTCTTACACCTAGGATAGCGGG<br>GTTACCAAT |
| Vibrio cholerae RC27<br>VIJ.Contig960              | ADAI01000039.1 | 58394-58500     | GTCACACTTTGGCAAACCCCTTTGAAAAAATGGGACGCAAAGCTTCCGGTCTGTCTGGTCAAGAAAGCTCATAAAGCACTCTTACACCTAGGATAGCGGG<br>GTTACCAAT |
| Vibrio cholerae RC27<br>VIJ.Contig963              | ADAI01000041.1 | 281046-281132   | TCACGCACAGGGCAAACCATTCGAAAGAGTGGGACGCAAAGCCTCCGGCCTAAACCAGAAGACGTGGTAGGTAGCGGGGTTACCGAT                           |
| Vibrio cholerae RC385<br>cont1.18                  | AAKH03000018.1 | 618060-617954   | GTCACACTTTGGCAAACCCCTTTGAAAAAATGGGACGCAAAGCCTCCGGTCTGTCTGGTCAAGAAAGCTCATAAAGCCCTCTTACACCTAGGATAGCGGG<br>GTTACCAAT |
| Vibrio cholerae RC385                              | AAKH03000009.1 | 28640-28726     | TCACGCACAGGGCAAACCATTCGAAAGAGTGGGACGCAAAGCCTCCGGCCTAAACCAGAAGACGTGGTAGGTAGCGGGGTTACCGAT                           |

|                                                     |                |               |                                                                                                                   |
|-----------------------------------------------------|----------------|---------------|-------------------------------------------------------------------------------------------------------------------|
| cont1.9                                             |                |               |                                                                                                                   |
| Vibrio cholerae RC9<br>VCC.Contig60                 | ACHX01000009.1 | 660097-659991 | GTCACACTTTGGCAAACCCCTTTGAAAAAATGGGACGCAAAGCTTCCGGTCTGTCTGGTCAAGAAAGCTCATAAAGCCCTATTACACCTAGGATAGCGGG<br>GTTACCAAT |
| Vibrio cholerae RC9<br>VCC.Contig62                 | ACHX01000011.1 | 282853-282939 | TCACGCACAGGGCAAACCATTCGAAAGAGTGGGACGCAAAGCCTCCGGCCTAAACCAGAAGACATGGTAGGTAGCGGGGTTACCGAT                           |
| Vibrio cholerae TM<br>11079-80 VIF.Contig82         | ACHW01000019.1 | 33510-33424   | TCACGCACAGGGCAAACCATTCGAAAGAGTGGGACGCAAAGCCTCCGGCCTAAACCAGAAGACGTGGTAGGTAGCGGGGTTACCGAT                           |
| Vibrio cholerae TM<br>11079-80 VIF.Contig91         | ACHW01000026.1 | 153407-153513 | GTCACACTTTGGCAAACCCCTTTGAAAAAATGGGACGCAAAGCTTCCGGTCTGTCTGGTCAAGAAAGCTCATAAAGCCCTCTTACATCTAGGATAGCGGG<br>GTTACCAAT |
| Vibrio cholerae TMA 21<br>VCB.Contig128             | ACHY01000016.1 | 146188-146294 | GTCACACTTTGGCAAACCCCTTTGAAAAAATGGGACGCAAAGCTTCCGGTCTGTCTGGTCAAGAAAGCTCATAAAGCCCTCTTACACCTAGGATAGCGGG<br>GTTACCAAT |
| Vibrio cholerae TMA 21<br>VCB.Contig158             | ACHY01000017.1 | 281216-281302 | TCACGCACAGGGCAAACCATTCGAAAGAGTGGGACGCAAAGCCTCCGGCCTAAACCAGAAGACATGGTAGGTAGCGGGGTTACCGAT                           |
| Vibrio cholerae V51<br>gcontig_1101953397202        | AAKI02000145.1 | 2735-2841     | GTCACACTTTGGCAAACCCCTTTGAAAAAATGGGACGCAAAGCTTCCGGTCTGTCTGGTCAAGAAAGCTCATAAAGCCCTCTTACACTTAGGATAGCGGG<br>GTTACCAAT |
| Vibrio cholerae V51<br>gcontig_1101953399652        | AAKI02000072.1 | 12068-12154   | TCACGCACAGGGCAAACCATTCGAAAGAGTGGGACGCAAAGCCTCCGGCCTAAACCAGAAGACGTGGTAGGTAGCGGGGTTACCGAT                           |
| Vibrio cholerae V52<br>gcontig_1103206895372        | AAKJ02000030.1 | 26337-26423   | TCACGCACAGGGCAAACCATTCGAAAGAGTGGGACGCAAAGCCTCCGGCCTAAACCAGAAGACGTGGTAGGTAGCGGGGTTACCGAT                           |
| Vibrio cholerae V52<br>gcontig_1103206896866        | AAKJ02000083.1 | 10246-10140   | GTCACACTTTGGCAAACCCCTTTGAAAAAATGGGACGCAAAGCTTCCGGTCTGTCTGGTCAAGAAAGCTCATAAAGCACTCTTACACCTAGGATAGCGGG<br>GTTACCAAT |
| Vibrio coralliilyticus ATCC<br>BAA-450 VIC.Contig71 | ACZN01000018.1 | 915382-915468 | CCACGAACAGGGCAAACCACTTCGAAAGAGTGGGACGCAAAGCTTCCGGCCTGACTCAGGAGACTGAAAGGTAGCGGGGTTGCCGAT                           |
| Vibrio coralliilyticus P1<br>contig00235            | AEQS01000211.1 | 9090-9176     | CCACGAACAGGGCAAACCACTTCGAAAGAGTGGGACGCAAAGCTTCCGGCCTGACTCAGGAGACTGAAAGGTAGCGGGGTTGCCGAT                           |

|                                                 |                |                 |                                                                                                                      |
|-------------------------------------------------|----------------|-----------------|----------------------------------------------------------------------------------------------------------------------|
| Vibrio fischeri ES114<br>chromosome I           | CP000020.2     | 1762259-1762341 | TCACGAACATGGCAAACCTACATGAAAATGTAGGACGCAAAGCTTCCGGCCTAAGTATTTATATAAGGTAGCGGGGTTGCCGAC                                 |
| Vibrio fischeri MJ11<br>chromosome I            | CP001139.1     | 1780753-1780835 | TCACGAACATGGCAAACCTACATGAAAATGTAGGACGCAAAGCTTCCGGCCTAAGTATTTATATAAGGTAGCGGGGTTGCCGAC                                 |
| Vibrio furnissii CIP 102972<br>VFA.Contig90     | ACZP01000013.1 | 323533-323448   | TCACGCACAGGGCAAACCATCTGAAAAGGTGGGACGCAAAGCCTCCGGCCTAAACCCAATTTTCGGGTAGGTAGCGGGGTTACCGAT                              |
| Vibrio furnissii NCTC<br>11218 chromosome 1     | CP002377.1     | 1685128-1685043 | TCACGCACAGGGCAAACCATCTGAAAAGGTGGGACGCAAAGCCTCCGGCCTAAACCCAATTTTGGGTAGGTAGCGGGGTTACCGAT                               |
| Vibrio harveyi 1DA3<br>Cont13                   | ACZC01000013.1 | 188423-188499   | ACTCATTAAGGGCAAACCAATCGTGAGGTTGGGACGCAAAGTGACAGCACAGGGATACTGTGGGCTGCATTGCTGAG                                        |
| Vibrio harveyi 1DA3<br>Cont50                   | ACZC01000050.1 | 13231-13142     | TCACGCACAGGGCAAACCATTCGAAAGGGTGGGACGCAAAGCCTCCGGCCTGAACCTATCTTATTAGATGGAAGGTAGCGGGGTTACCGAT                          |
| Vibrio harveyi ATCC<br>BAA-1116 chromosome I    | CP000789.1     | 1588082-1587993 | TCACGCACAGGGCAAACCATTCGAAAGGGTGGGACGCAAAGCCTCCGGCCTGAACCATCGAATTAGATGGAAGGTAGCGGGGTTACCGAT                           |
| Vibrio harveyi HY01<br>gcontig_1104549820419    | AAWP01000006.1 | 124156-124245   | TCACGCACAGGGCAAACCATTCGAAAGGGTGGGACGCAAAGCCTCCGGCCTGAACCATCGAATTAGATGGAAGGTAGCGGGGTTACCGAT                           |
| Vibrio ichthyenteri ATCC<br>700023 VII00023_104 | AFWF01000007.1 | 54192-54105     | ACACACTGTTCGGCAAACCATTTGAAAAAATGGGACGCAAAGCTTCCGGTCTAACGATAATTCTTATCTACGATAGCGGAGCCGCCACT                            |
| Vibrio ichthyenteri ATCC<br>700023 VII00023_281 | AFWF01000175.1 | 38395-38307     | TCACGCACAGGGCAAACCATTTCTGAAAAGATGGGACGCAAAGCCACCGACCTACACATTGAATAAATGCACGGCAGCGGGGTTACCGAT                           |
| Vibrio metschnikovii CIP<br>69.14 VIB.Contig146 | ACZO01000006.1 | 562466-562384   | TCACGCACAGGGCAAACCATTTGAAAAGATGGGACGCAAAGCCTCCGGCCTAAACCATAGTGGTAGGTAGCGGGGTTGCCGAT                                  |
| Vibrio mimicus MB-451<br>Contig42               | ADAF01000002.1 | 1275675-1275785 | ATCACATTTTCGGCAAACCACTTGAAAAAGTGGGACGCAAAGCTTCCGGTCTGTGGGTTAAAGAGGTTCCCGACGAACACGACTTCAAACCTATGATAG<br>CGGGGTTGCCATA |
| Vibrio mimicus MB-451                           | ADAF01000001.1 | 1074675-1074589 | TCACGCACAGGGCAAACCATTTGAAAAAGTGGGACGCAAAGCCTCCGGCCTAAACCAGAGTTCATGGTAGGTAGCGGGGTTACCGAT                              |

|                                                       |                |                 |                                                                                                                     |
|-------------------------------------------------------|----------------|-----------------|---------------------------------------------------------------------------------------------------------------------|
| Contig43                                              |                |                 |                                                                                                                     |
| Vibrio mimicus SX-4<br>Contig1                        | ADOO01000001.1 | 11561-11647     | TCACGCACAGGGCAAACCATTTGAAAAAGTGGGACGCAAAGCCTCCGGCCTAAACCAGAGTTCATGGTAGGTAGCGGGGTTACCGAT                             |
| Vibrio mimicus SX-4<br>Contig8                        | ADOO01000008.1 | 207644-207754   | ATCACATTTTCGGCAAACCACTTGAAAAAGTGGGACGCAAAGCTTCCGGTCTGTGGGTAAAGAGGTTCCCGACGAACACGACTTCAAACCTATGATAG<br>CGGGGTTGCCATA |
| Vibrio mimicus VM223<br>VMA.Contig52                  | ADAJ01000007.1 | 980657-980547   | ATCACATTTTCGGCAAACCACTTGAAAAAGTGGGACGCAAAGCTTCCGGTCTGTGGGTAAAGAGGTTCCCGACGAACACGACTTCAAACCTATGATAG<br>CGGGGTTGCCATA |
| Vibrio mimicus VM223<br>VMA.Contig53                  | ADAJ01000008.1 | 1115356-1115442 | TCACGCACAGGGCAAACCATTTGAAAAAGTGGGACGCAAAGCCTCCGGCCTAAACCAGAGTTCATGGTAGGTAGCGGGGTTACCGAT                             |
| Vibrio mimicus VM573<br>Cont32                        | ACYV01000032.1 | 4409-4299       | ATCACATTTTCGGCAAACCACTTGAAAAAGTGGGACGCAAAGCTTCCGGTCTGTGGGTAAAGAGGTTCCCGACGAACACGACTTCAAACCTATGATAG<br>CGGGGTTGCCATA |
| Vibrio mimicus VM573<br>Cont8                         | ACYV01000008.1 | 760138-760052   | TCACGCACAGGGCAAACCATTTGAAAAAGTGGGACGCAAAGCCTCCGGCCTAAACCAGAGTTCATGGTAGGTAGCGGGGTTACCGAT                             |
| Vibrio mimicus VM603<br>Cont30                        | ACYU01000014.1 | 139538-139648   | ATCACATTTTCGGCAAACCACTTGAAAAAGTGGGACGCAAAGCTTCCGGTCTGTGGGTAAAGAGGTTCCCGACGAACACGACTTCAAACCTATGATAG<br>CGGGGTTGCCATA |
| Vibrio mimicus VM603<br>Cont474                       | ACYU01000186.1 | 66718-66804     | TCACGCACAGGGCAAACCATTTGAAAAAGTGGGACGCAAAGCCTCCGGCCTAAACCAGAGTTCATGGTAGGTAGCGGGGTTACCGAT                             |
| Vibrio nigrapulchritudo<br>ATCC 27043<br>VINI7043_164 | AFWJ01000073.1 | 9690-9783       | TCACGCACAGGGCAAACCATTTGAAAAAGTGGGACGCAAAGCTTCCGGCCTAAATGGATGTATAAAAAATCCAAATGGTAGCGGGGTTGCCGAT                      |
| Vibrio nigrapulchritudo<br>ATCC 27043 VINI7043_6      | AFWJ01000289.1 | 14509-14601     | ACGCTCAAAAGGCAAACCTTGCTTAAAAGCAGGGACGCAAAATGACAGTGCCACTGATTTTTGGAGAGGATTATTGGCAGGCTGCATTACAAGA                      |
| Vibrio nigrapulchritudo<br>ATCC 27043 VINI7043_6      | AFWJ01000289.1 | 16356-16452     | CGACTCTTAGGGCAAACCCATTGAGAAGTGGGGCGCAAAATGACAGTACCTAGTTAACTTTAGGACGTTCAATTTAGGTAGGCTGCATTGCTGAG                     |
| Vibrio nigrapulchritudo                               | AFWJ01000289.1 | 18174-18339     | TCGCTCTAAGGGCAAACCTGGCTGTAAAGTCAGGGCGCAAAATGACAGTGCCTGATGGCAGTGGTCGCTGAGTTAAGTCATTACGCTGTGTTGATTTTT                 |

|                                                                                |                |               |                                                                                                           |
|--------------------------------------------------------------------------------|----------------|---------------|-----------------------------------------------------------------------------------------------------------|
| ATCC 27043 VINI7043_6                                                          |                |               | CACAATAAGTCGCGTTAACGCTCAATGGAAACATCAACAGTCCAATCAGGCAGGCTGCATTGCTGAG                                       |
| Vibrio ordalii ATCC 33509<br>contig00150                                       | AEZC01000128.1 | 5972-5887     | TCACGCACAGGGCAAACCATTTGAAAGGATGGGACGCAAAGCCTCCGGCCTAAACTGAATATTCAATAGGTAGCGGGTTGCCGAT                     |
| Vibrio orientalis CIP 102891<br>= ATCC 33934 strain CIP<br>102891 VIA.Contig79 | ACZV01000004.1 | 867727-867816 | CGGCACITTTGGCAAACCTATTCGAAAGGATAAGACGCAAAGCTTCCGGTCTGTCCGTACATATCGTACCTATGATAGCGGGTTGCCACT                |
| Vibrio orientalis CIP 102891<br>= ATCC 33934 strain CIP<br>102891 VIA.Contig80 | ACZV01000005.1 | 451367-451280 | CCACGAACAGGGCAAACCATTTGAAAGGATGGGACGCAAAGCCTCCGGCCTTCAACAAGTTAATTGTTTGGTAGCGGGTTGCCGAT                    |
| Vibrio orientalis CIP 102891<br>= ATCC 33934 strain CIP<br>102891 VIOR3934_1   | AFWH01000001.1 | 264756-264667 | CGGCACITTTGGCAAACCTATTCGAAAGGATAAGACGCAAAGCTTCCGGTCTGTCCGTACATATCGTACCTATGATAGCGGGTTGCCACT                |
| Vibrio orientalis CIP 102891<br>= ATCC 33934 strain CIP<br>102891 VIOR3934_40  | AFWH01000041.1 | 15003-14916   | CCACGAACAGGGCAAACCATTTGAAAGGATGGGACGCAAAGCCTCCGGCCTTCAACAAGTTAATTGTTTGGTAGCGGGTTGCCGAT                    |
| Vibrio parahaemolyticus<br>10329 VP10329_21                                    | AFBW01000012.1 | 426847-426936 | TCACGCACAGGGCAAACCATCCGAAAGGTTGGGACGCAAAGCCTCCGGCCTGAACCATAGTAGTATATGAAGGTAGCGGGTTACCGAT                  |
| Vibrio parahaemolyticus<br>10329 VP10329_38                                    | AFBW01000028.1 | 268312-268416 | ATCACATTTCGGCAAACCATTCGAAAGGATGGGACGCAAAGCTTCCGGTCTGCCAGCACTGCTTAAGTAGTCAACACTAGTGCTTAAGATAGCGGGTTGCCACT  |
| Vibrio parahaemolyticus 16<br>ctg_1108854221719                                | ACCV01000017.1 | 11091-11005   | CCACGAACAGGGCAAACCATTTGAAAGGATGGGACGCAAAGCCTCCGGCCTTAAGTATACTTATACAAGGTAGCGGGTTGCCGAT                     |
| Vibrio parahaemolyticus 16<br>ctg_1108854221733                                | ACCV01000124.1 | 3623-3535     | CTGCACTTCTGGCAAACCTATCTGAAAAGTTAGGACGCAAAGTCTCCGGTCTGTGCACTCACTCAAGTCTATGATAGCGGGACCGCCACC                |
| Vibrio parahaemolyticus<br>AN-5034                                             | ACFO01000050.1 | 596713-596817 | ATCACATTTCGGCAAACCATTCGAAAGGATGGGACGCAAAGCTTCCAGTCTGCCAGCACTGCTTAAGTAGTCAACACTAGTGCTTAAGATAACGGGGTTGCCACT |

|                                                             |                |               |                                                                                                               |
|-------------------------------------------------------------|----------------|---------------|---------------------------------------------------------------------------------------------------------------|
| gcontig_1113976711500                                       |                |               |                                                                                                               |
| Vibrio parahaemolyticus<br>AN-5034<br>gcontig_1113976711502 | ACFO01000009.1 | 100724-100635 | TCACGCACAGGGCAAACCATCCGAAAGGGTGGGACGCAAAGCCTCCGGCCTGAACCATAGTAGTATATGGAAGGTAGCGGGGTACCGAT                     |
| Vibrio parahaemolyticus<br>AQ3810<br>gcontig_1104296539730  | AAWQ01000012.1 | 171-275       | ATCACATTTTCGGCAAACCATTCGAAAGGATGGGACGCAAAGCTTCCGGTCTTCCAGCACTGCTTAAGTAGTCAACACTAGTGCTTAAGATAGCGGGGT<br>GCCACT |
| Vibrio parahaemolyticus<br>AQ3810<br>gcontig_1104296540634  | AAWQ01000045.1 | 17416-17505   | TCACGCACAGGGCAAACCATCCGAAAGGGTGGGACGCAAAGCCTCCGGCCTGAACCATAGTAGTATATGGAAGGTAGCGGGGTACCGAT                     |
| Vibrio parahaemolyticus<br>AQ3810<br>gcontig_1104296542148  | AAWQ01000571.1 | 193-89        | ATCACATTTTCGGCAAACCATTCGAAAGGATGGGACGCAAAGCTTCCGGTCTTCCAGCACTGCTTAAGTAGTCAACACTAGTGCTTAAGATAGCGGGGT<br>GCCACT |
| Vibrio parahaemolyticus<br>AQ3810<br>gcontig_1104296547160  | AAWQ01000114.1 | 171-275       | ATCACATTTTCGGCAAACCATTCGAAAGGATGGGACGCAAAGCTTCCGGTCTTCCAGCACTGCTTAAGTAGTCAACACTAGTGCTTAAGATAGCGGGGT<br>GCCACT |
| Vibrio parahaemolyticus<br>AQ3810<br>gcontig_1104296555802  | AAWQ01000087.1 | 9659-9555     | ATCACATTTTCGGCAAACCATTCGAAAGGATGGGACGCAAAGCTTCCGGTCTTCCAGCACTGCTTAAGTAGTCAACACTAGTGCTTAAGATAGCGGGGT<br>GCCACT |
| Vibrio parahaemolyticus<br>AQ4037<br>gcontig_1113976701954  | ACFN01000028.1 | 32858-32962   | ATCACATTTTCGGCAAACCATTCGAAAGGATGGGACGCAAAGCTTCCGGTCTTCCAGCACTGCTTAAGTAGTCAACATTAGTGCTTAAGATAGCGGGGT<br>GCCACT |
| Vibrio parahaemolyticus<br>AQ4037<br>gcontig_1113976703408  | ACFN01000044.1 | 10796-10707   | TCACGCACAGGGCAAACCATCCGAAAGGGTGGGACGCAAAGCCTCCGGCCTGAACCATAGTAGTATATGGAAGGTAGCGGGGTACCGAT                     |

|                                                              |                |                 |                                                                                                            |
|--------------------------------------------------------------|----------------|-----------------|------------------------------------------------------------------------------------------------------------|
| Vibrio parahaemolyticus<br>K5030<br>gcontig_1118352721751    | ACKB01000125.1 | 18296-18385     | TCACGCACAGGGCAAACCATCCGAAAGGGTGGGACGCAAAGCCTCCGGCCTGAACCATAGTAGTATATGGAAGGTAGCGGGGTACCGAT                  |
| Vibrio parahaemolyticus<br>K5030<br>gcontig_1118352721827    | ACKB01000054.1 | 343148-343252   | ATCACATTTTCGGCAAACCATTCGAAAGGATGGGACGCAAAGCTTCCAGTCTGCCAGCACTGCTTAACTAGTCAACACTAGTGCTTAAGATAACGGGGTTGCCACT |
| Vibrio parahaemolyticus<br>Peru-466<br>gcontig_1113329539760 | ACFM01000057.1 | 29049-29153     | ATCACATTTTCGGCAAACCATTCGAAAGGATGGGACGCAAAGCTTCCAGTCTGCCAGCACTGCTTAACTAGTCAACACTAGTGCTTAAGATAACGGGGTTGCCACT |
| Vibrio parahaemolyticus<br>Peru-466<br>gcontig_1113348543590 | ACFM01000141.1 | 9244-9155       | TCACGCACAGGGCAAACCATCCGAAAGGGTGGGACGCAAAGCCTCCGGCCTGAACCATAGTAGTATATGGAAGGTAGCGGGGTACCGAT                  |
| Vibrio parahaemolyticus<br>RIMD 2210633 DNA                  | BA000031.2     | 1078742-1078653 | TCACGCACAGGGCAAACCATCCGAAAGGGTGGGACGCAAAGCCTCCGGCCTGAACCATAGTAGTATATGGAAGGTAGCGGGGTACCGAT                  |
| Vibrio parahaemolyticus<br>RIMD 2210633 DNA                  | BA000032.2     | 1695926-1696030 | ATCACATTTTCGGCAAACCATTCGAAAGGATGGGACGCAAAGCTTCCAGTCTGCCAGCACTGCTTAACTAGTCAACACTAGTGCTTAAGATAACGGGGTTGCCACT |
| Vibrio rotiferianus DAT722<br>contig00056                    | AFAJ01000025.1 | 99303-99213     | TCACGCACAGGGCAAACCACTCTAAAGGGTGGGACGCAAAGCTTCCGGCCTAACTATCGCATGAGATAGCATGGTAGCGGGGTACCGAT                  |
| Vibrio scophthalmi LMG<br>19158 VIS19158_176                 | AFWE01000073.1 | 62760-62673     | ACACACTGTCGGCAAACCATTTGAAAAAATGGGACGCAAAGCTTCCGGTCTAACGATAAAATTTATCCACGATAGCGGAGCCGCCACT                   |
| Vibrio scophthalmi LMG<br>19158 VIS19158_9                   | AFWE01000220.1 | 3180-3101       | AACGAGAAAAGCCAAACCTATCGCGAGGTAGGGACGGAAAGCTGCAGGTCTCATTCCATTGAGATGGCTGAGCCGCCTCA                           |
| Vibrio scophthalmi LMG<br>19158 VIS19158_95                  | AFWE01000226.1 | 43115-43203     | TCACGCACAGGGCAAACCAAACCTGAAAAGTTGGGACGCAAAGCCACCGACCTAAACATTGTAATGATGTACGGCAGCGGGGTACCGAT                  |
| Vibrio shilonii AK1                                          | ABCH01000059.1 | 9246-9159       | TCACGCACAGGGCAAACCACTTGAAAGGGTGGGACGCAAAGCCACCGGCCTAAACCAAATTTATTGATAGGTAGCGGGGTACCGAT                     |

|                                             |                |                 |                                                                                                                     |
|---------------------------------------------|----------------|-----------------|---------------------------------------------------------------------------------------------------------------------|
| 1103207001995                               |                |                 |                                                                                                                     |
| Vibrio sinaloensis DSM<br>21326 VISI1226_47 | AEVT01000083.1 | 27776-27690     | ATGCACTTCTGGCAAACCTATCTGAAAAGATAGGACGCAAAGCCACCGGTCTGTCGACAATTTTGTCTATGATAGCGGGGCCCGCT                              |
| Vibrio sinaloensis DSM<br>21326 VISI1226_68 | AEVT01000105.1 | 24695-24782     | CCACGAACAGGGCAAACCACTCCGAAAGGATGGGACGCAAAGCCACCGGCCTTAAGTAATGTGTTTACAAGGTAGCGGGGTTGCCGAT                            |
| Vibrio sp. AND4<br>1103602000573            | ABGR01000006.1 | 118490-118579   | TCACGCACAGGGCAAACCTCTCGAAAGGGGGGACGCAAAGCCTCCGGCCTGAACCATCGAATTAGATGGAAGGTAGCGGGGTTACCGAT                           |
| Vibrio sp. Ex25<br>chromosome 1             | CP001805.1     | 2580794-2580883 | TCACGCACAGGGCAAACCATTCGAAAGGGTGGGACGCAAAGCCTCCGGCCTGAACCATAATACTATATGGAAGGTAGCGGGGTTACCGAT                          |
| Vibrio sp. Ex25<br>chromosome 2             | CP001806.1     | 1291324-1291224 | ATCACATTTTCGGCAAACCATTCGAAAGGGTGGGACGCAAAGCTTCCGGTCTGTCAGCATTCATCATCAAAAGTAATGCTCATGATAGCGGGGTTGCCAT<br>G           |
| Vibrio sp. Ex25<br>gcontig_1102407882090    | AAKK02000061.1 | 16343-16432     | TCACGCACAGGGCAAACCATTCGAAAGGGTGGGACGCAAAGCCTCCGGCCTGAACCATAATACTATATGGAAGGTAGCGGGGTTACCGAT                          |
| Vibrio sp. MED222<br>1099517005443          | AAND01000010.1 | 47376-47291     | TCACGCACAGGGCAAACCACTTGAAAAAGTGGGACGCAAAGCTTCCGGCCTAAACCACTCGTTGGTATGGTAGCGGGGTTACCGAT                              |
| Vibrio sp. N418<br>VIBRN418_13              | AFWD01000016.1 | 79627-79548     | AACGAGAAAAGCCAAACCTATCGCGAGGTAGGGACGGAAGCTGCAGGTCTCATTCCATTGAGATGGCTGAGCCGCCTCA                                     |
| Vibrio sp. N418<br>VIBRN418_140             | AFWD01000022.1 | 16289-16377     | TCACGCACAGGGCAAACCAAACTGAAAAGTGGGACGCAAAGCCACCGGCCTAAACATTGTAATGATGTACGGCAGCGGGGTTACCGAT                            |
| Vibrio sp. N418<br>VIBRN418_89              | AFWD01000095.1 | 82012-82099     | ACACACTGTCTGGCAAACCATTTGAAAAAATGGGACGCAAAGCTTCCGGTCTAACGATAATATTATCCACGATAGCGGAGCCGCCACT                            |
| Vibrio sp. RC341<br>VCJ.Contig153           | ACZT01000023.1 | 296971-297056   | TCACGCACAGGGCAAACCATTCGAAAGAGTGGGACGCAAAGCCTCCGGCCTAAACCAGAACATAGGTAGGTAGCGGGGTTACCGAT                              |
| Vibrio sp. RC341<br>VCJ.Contig161           | ACZT01000025.1 | 262127-262237   | ATCACATTTTCGGCAAACCATTTGAAAAAATGGGACGCAAAGCCTCCGGTCTGTCGGTTCGAGAAAAGCTCAACAAACGGTTTCTCAATCTATGATAGC<br>GGGGCCGCCATA |



|                                             |                |                 |                                                                                                                  |
|---------------------------------------------|----------------|-----------------|------------------------------------------------------------------------------------------------------------------|
| Vibrio sp. RC586<br>VOA.Contig110           | ADBD01000010.1 | 477413-477519   | GTCACACTTCGGCAAACCATTTGAAAAAATGGGACGCAAAGCTTCCGGTCTGTTCGGTCAAGAAAGCTCATAAAGCCCTCTTAAACCTATGATAGCGGG<br>GTTGCCAAT |
| Vibrio sp. RC586<br>VOA.Contig114           | ADBD01000013.1 | 222759-222846   | TCACGCACAGGGCAAACCATTTGAAAAAGTGGGACGCAAAGCCTCCGGCCTAAACCAAAAGTTTATGGTAGGTAGCGGGGTTACCGAT                         |
| Vibrio splendidus 12B01<br>1099451319034    | AAMR01000021.1 | 11847-11762     | TCACGCACAGGGCAAATCACTTGAAAGAGTGAGACGCAAAGCTTCCGGCCTAAACCACTCGTTGGTATGGTAGCGGGGTTACCGAT                           |
| Vibrio splendidus 12B01<br>1099451319042    | AAMR01000015.1 | 100102-100013   | ACGCACCTTCTGGCAAACCTATTTGAAAGAATAGGACGCAAAGCCACCGGTCTGTGACAATTATTCTGTCTATGATAGCGGGGCCGCGCT                       |
| Vibrio splendidus ATCC<br>33789 VISP3789_12 | AFWG01000004.1 | 132090-132005   | TCACGCACAGGGCAAATCACTTGAAAGAGTGAGACGCAAAGCTTCCGGCCTAAACCACTCGTTGGTATGGTAGCGGGGTTACCGAT                           |
| Vibrio splendidus ATCC<br>33789 VISP3789_9  | AFWG01000089.1 | 45553-45464     | ACGCACCTTCTGGCAAACCTATTTGAAAGAATAGGACGCAAAGCCACCGGTCTGTGACAATTATTCTGTCTATGATAGCGGAGCTGCCACT                      |
| Vibrio splendidus LGP32<br>chromosome I     | FM954972.2     | 1146263-1146178 | TCACGCACAGGGCAAACCACTTGAAAAAGTGGGACGCAAAGCTTCCGGCCTAAACCACTCGTTGGTATGGTAGCGGGGTTACCGAT                           |
| Vibrio tubiashii ATCC<br>19109 VITU9109_20  | AFWI01000113.1 | 53825-53911     | CCACGAACAGGGCAAACCATTCGAAAGGATGGGACGCAAAGCCTCCGGCCTTAAACAATTTATTGTCTGGTAGCGGGGTTGCCGAT                           |
| Vibrio tubiashii ATCC<br>19109 VITU9109_88  | AFWI01000214.1 | 14803-14890     | CTGCACTTCAGGCAAACCTATCCGAAAGGTTAGGACGCAAAGCCACCGGTCTGTGACATCTTATGTCTATGATAGCGGGGTTGCCATT                         |
| Vibrio vulnificus CMCP6<br>chromosome I     | AE016795.3     | 2138086-2137998 | TCACGCACAGGGCAAACCATTTGAAAAAGTGGGACGCAAAGCCTCCGGCCTAAACCAGACGTTTTTTGGTAGGTAGCGGGGTTACCGAT                        |
| Vibrio vulnificus CMCP6<br>chromosome II    | AE016796.2     | 45972-45881     | ATCACACATAGGCAAACCTTCTGAAAAGATGGGACGCAAAGCTTCCGGTCTGTTCGGTATTTTTATCATACCCAAGATAGCGGGGCCGCGCT                     |
| Vibrio vulnificus MO6-24/O<br>chromosome I  | CP002469.1     | 1123237-1123149 | TCACGCACAGGGCAAACCATTTGAAAAAGTGGGACGCAAAGCCTCCGGCCTAAACCAGACGTTTTTTGGTAGGTAGCGGGGTTACCGAT                        |
| Vibrio vulnificus MO6-24/O                  | CP002470.1     | 602641-602550   | ATCACACATAGGCAAACCTTCTGAAAAGATGGGACGCAAAGCTTCCGGTCTGTTCGGTATTTTTACCATACCCAAGATAGCGGGGCCGCGCT                     |

|                                               |                |                 |                                                                                              |
|-----------------------------------------------|----------------|-----------------|----------------------------------------------------------------------------------------------|
| chromosome II                                 |                |                 |                                                                                              |
| Vibrio vulnificus YJ016<br>DNA                | BA000037.2     | 2327906-2327994 | TCACGCACAGGGCAAACCATTTGAAAAAGTGGGACGCAAAGCCTCCGGCCTAAACCAGACGTTTTTTGGTAGGTAGCGGGGTACCGAT     |
| Vibrio vulnificus YJ016<br>DNA                | BA000038.2     | 624584-624493   | ATCACACATAGGCAAACCTTCTGAAAAGATGGGACGCAAAGCTTCCGGTCTGTCTGGTATTTTATCATACCCAAGATAGCGGGGCCCGCGCT |
|                                               |                |                 |                                                                                              |
| Vibrionales bacterium<br>SWAT-3 1101732140710 | AAZW01000020.1 | 21384-21469     | TCACGCACAGGGCAAATCACTTGAAAAGGTGAGACGCAAAGCTTCCGGCCTAAACCACTCGTTGGTATGGTAGCGGGGTACCGAT        |
| Vibrionales bacterium<br>SWAT-3 1101732140720 | AAZW01000005.1 | 50241-50330     | ACGCACTTCTGGCAAACCTATTGAAAGAATAGGACGCAAAGCCACCGGTCTGTCTGACAAATGTTCTGTCTATGATAGCGGAGCTGCCACT  |
|                                               |                |                 |                                                                                              |
| Wallaby gut metagenome<br>FWYF9480.b1         | ADGC01050767.1 | 157-231         | TCAAGAATAGGGCAAAGCATCTGAAAAGATGTGACGCAAGCTAAAGGGCCTGTAAAATGGCAGCCAGCTGCACCA                  |
| Wallaby gut metagenome<br>MeugComb_C12011     | ADGC01012011.1 | 2308-2383       | TGAATAAAATCGCACACTTGGAGAAATCCAGGGTCGCAAAGCTATAGGACCTTTCACATGGTAGCCAGTTGCAATG                 |

\*The original RNA sequences were downloaded from Rfam FTP site

**Table S3 c-di-GMP-II riboswitch**

| Samples                                                                  |                | Location        | Sequence*                                                                                                 |
|--------------------------------------------------------------------------|----------------|-----------------|-----------------------------------------------------------------------------------------------------------|
| Acetohalobium arabaticum DSM 5501                                        | CP002105.1     | 21848-21766     | TTAATAATGAGAACGTTGAAGTATAACTTGTATTGGTCACCTAAGTTATATGGAGTTAGTGGTGAAACCTCCTCATATTTAT                        |
|                                                                          |                |                 |                                                                                                           |
| Actinosynnema mirum DSM 43827                                            | CP001630.1     | 6488894-6488813 | GGCCGAAGGCGAAGCGATGAACCACCGGGCGTGTCTGGTCGCCGGTCCGATGGGGAGCTAGCGGCCGAACCCACCGCTGGGC                        |
|                                                                          |                |                 |                                                                                                           |
| Alicyclobacillus acidocaldarius LAA1<br>ctg1                             | ACCS01000001.1 | 83237-83153     | ACGTCTGGTGGACGCGAAGATCTCAGGTCGTCACGTGGGCACATAAGGCCTGAGGGAGCGAGTTGTGCAACCGGCCACCCGCGCA                     |
| Alicyclobacillus acidocaldarius subsp.<br>acidocaldarius DSM 446         | CP001727.1     | 379758-379674   | CACGACGGTGGACGCGAAGATCTCAGGTCGTCATCTGGGCACATAAGGCCTGAGGGAGCGAGTTGTGCAACCGGCCACCCGCGTA                     |
| Alicyclobacillus acidocaldarius subsp.<br>acidocaldarius Tc-4-1          | CP002902.1     | 450249-450167   | CATGACGGTGGACGCGAAGATCTCAGGTCGTCATCTGGGCACATAAGGCCTGAGGGAGCGAGTTGTGCAACCGGCCACCCGCG                       |
|                                                                          |                |                 |                                                                                                           |
| Alkaliphilus metalliredigens QYMF                                        | CP000724.1     | 3560727-3560645 | AAAAATGTAGAGCAAATGAACTGCAGGTATACATGGACGCCTTAAACTGCAGGGATGTAGTGGCGTAACCGACTAACAATATT                       |
|                                                                          |                |                 |                                                                                                           |
| Anaerobaculum hydrogeniformans<br>ATCC BAA-1850<br>A_SpOS1-1.0.1_Cont1.5 | ACJX02000017.1 | 195834-195922   | GGTTTAGGGGAAACGATGATCCCTTTGCATCTCTGATGACGGGCGCAAGAGCGAAGGGGGAGTGAGTAGCGCGACCGGCCCCGTAGAG<br>C             |
|                                                                          |                |                 |                                                                                                           |
| Anaerolinea thermophila UNI-1 DNA                                        | AP012029.1     | 2238146-2238247 | TGAAAAAGTGGAGGCGATGACTCGAGGTCTGTAACTGGTCGCTTGCTCGAAATTCTGGGCAAAGACCTCGACGAGCCAATGGCGAAA<br>CCGTCCACTTGACA |
| Anaerolinea thermophila UNI-1 DNA                                        | AP012029.1     | 1764854-1764753 | TTATTTTGTGGAGGCGTTGACTCAGAACGGGATAGTTGGTCGCTTTCCCAAGAATTGGGAAGTGTCTGATGAGCCAGTAGCGAAACC<br>GACCACAAAAAGG  |
| Anaerolinea thermophila UNI-1 DNA                                        | AP012029.1     | 1525234-1525130 | CATTTTGTGGAGGCGTTAATCCACAGGATGAGTTTGGTCGCTCATCTGTCAAACGGGCAGAGAAATTCTGTGGGGAGTCAATAGCGAA                  |

|                                                |                |                 |                                                                                       |
|------------------------------------------------|----------------|-----------------|---------------------------------------------------------------------------------------|
|                                                |                |                 | ACCGGTCCTGAGGATG                                                                      |
|                                                |                |                 |                                                                                       |
| Bacillus cellulosilyticus DSM 2522             | CP002394.1     | 3293603-3293521 | TTATATTAAGGAGCGATGAAAAATGATCTACATGTGGGCACTTGGATCATTAGGAGCGAGTAGTGCAACCGGACTTTATATAT   |
| Bacillus cellulosilyticus DSM 2522             | CP002394.1     | 3192859-3192776 | AATTTAAAAGGTAGCGAAGAATATATGTCTTGATTGGGCACTTGGACATACAGGAGCTAGTAGTGCAACCGACCTTGTATT     |
| Bacillus coahuilensis m4-4<br>1955101000007    | ABFU01000007.1 | 19777-19861     | ACAAATTGTGGAAGCGATGAGGGATTGACGGCACTGGGCACTTAGTCAAACCTTAGCTTATAGTGCAACCGGCCACATCCTAT   |
| Bacillus coahuilensis m4-4<br>1955101000013    | ABFU01000013.1 | 89831-89915     | TTGCAATGAGGAATGCTACGACCCATAATTAGTACTTGGGCGCTTTGATTTAGGATAGCTAATAGCGCAACCGGCCACATTGAGA |
| Bacillus halodurans C-125 DNA                  | BA000004.3     | 387918-387999   | AATCAATAGGGAAGCAACGAAGCATAGCCTTTATATGGCACTTGGGTTATGTGGAGCTACTAGTGTAACCGGCCCTCCTTT     |
| Bacillus pseudofirmus OF4                      | CP001878.2     | 854191-854275   | TAAATTGACGGATACGTTGAAAACCTCTCTGTAAATTGGGCGCTTTGAGAAGTTGGAGTAAGTAGCGCAACCGGCCGATAAAGGG |
| Bacillus pseudofirmus OF4                      | CP001878.2     | 2833763-2833680 | TTTCATATGGAACGTGATGAAAAGCTATCTGTACATGGGCACTTGGGTAGTTTGGAGCAGCTAGTGCAACCGGCCAATTTTGTC  |
| Bacillus selenitireducens MLS10                | CP001791.1     | 1643284-1643367 | ACGACAATTGGATGCTGAGAAGAAATGGGTACTATCTGGGCACTTAACCATTTTGGAGCTGCTAGTGCAACCGGCCGGAGACAT  |
| Bacillus selenitireducens MLS10                | CP001791.1     | 652937-653016   | TGCCCCGAATGGAAACGTTGATGAGATGACTGTATGTGGGCACTTGGTCATTTCCGAGTGAGTAGTGCAACCGGCCGAGCA     |
| Bacillus sp. 2_A_57_CT2 cont1.22               | ACWD01000022.1 | 14544-14461     | GGACAAGTTGGAAGCAATGAGAATTCAAGGAAAAATGGGCGCTTTAATGAATTCGAGCTAGTAGCGCAACCGGCCAGCACTTAC  |
| Bacillus sp. NRRL B-14911<br>1099999053126     | AAOX01000007.1 | 31274-31356     | AAGAATATAGAACTGTGATGAGCGGTTTTTATTGCACCTTTAAACCGCTTGGAGTGACTAGTGACGCCGCCAATGATCTA      |
| Bacillus tusciae DSM 2912                      | CP002017.1     | 2052455-2052535 | GTCTGGTTTGGAGGCAATGAAAACTGTCTGGAATTGGGCGCTTGGACAGTTGGGAGCCAGTAGCGCAACCGGCCAATGTC      |
|                                                |                |                 |                                                                                       |
| Bioreactor metagenome<br>PBDCA2_FIDWTPW02QBO29 | AGTN01455485.1 | 501-449         | ACCTGGGCACTTTGGGCTATATGGAGCAAGTGGTGCAACCGGCAATCTTTTTT                                 |
| Bioreactor metagenome<br>PBDCA2_FIDWTPW02RWU4G | AGTN01346032.1 | 500-419         | TAAATATAGGGATACCTTGATGGAATTGTGTATATGGGCACTTTCAATTTCCGGAGTATATAGTGCAACCGACCTGCTTA      |
| Bioreactor metagenome<br>PBDCA2_FIDWTPW02RY3K3 | AGTN01199440.1 | 195-276         | CAGTAATGTGGAAGCTATGAAGCATGACCTGTATCTGGTTGCCTGGGTCATGATGAGCTAATGGCAAACCCACCCACTTTGG    |
| Bioreactor metagenome                          | AGTN01413439.1 | 514-432         | AGACAGTGGGATGCAATGACGTGTAAAAACACTATGTGGTCACTATTTACACCGAGCTAATAGTGAACCCCTCCGGACTGTAA   |

|                                                      |                |                 |                                                                                                                                                              |
|------------------------------------------------------|----------------|-----------------|--------------------------------------------------------------------------------------------------------------------------------------------------------------|
| PBDCA2_FIDWTPW02RYRLV                                |                |                 |                                                                                                                                                              |
| Bioreactor metagenome<br>PBDCA2_FIDWTPW02TG8FK       | AGTN01151901.1 | 40-123          | ATTTAATAATGAAACAATGAAGTCGGGTTTGTATGTGGTCACTTAAACCTGATGGAGTTAGTAGTGAAACCGGCGATGTTAAAT                                                                         |
| Bioreactor metagenome<br>PBDCA2_FISUTAU01CWAZC       | AGTN01652160.1 | 197-114         | AAAAAAAGTGGAAACTATGAAAAATTCTCTTTATTTGGGCACCTTGGAGAATTTAGAGTTAGTAGTGCAACCGACCAATAGATAG                                                                        |
| Bioreactor metagenome<br>PBDCA2_GBB5CE401AO6U7       | AGTN01001494.1 | 194-110         | AAACGAGATTGATGCGAAGACATATAGCTTGTATTGGGCACCTTGGGCTGTATTGAGCGAGTGGTGCAACCGGCATTTTTTTTA                                                                         |
| Bioreactor metagenome<br>PBDCA2_GBB5CE401EDRAX_right | AGTN01137125.1 | 306-155         | AAACTAAGCGGATGCGATAATATACAGCTTTTATTGGTCACTTAGAGTGATAGGAGATGCTCAGTTCAGAGGGATCTCTCAAGCACTCCT<br>GGGGGAGAAAGTTGACTTCCAGAGAGCTGTATGGAGCAAGAGTGAAACCGACCGTGCTGATA |
|                                                      |                |                 |                                                                                                                                                              |
| Brevibacillus brevis NBRC 100599<br>DNA              | AP008955.1     | 5612470-5612389 | AGGTAGGAAAGAAGCGAAGAAGTACGGACTGTATCTGGTCGCTTGGTCCGTATGGAGCCAGTAGCGAATCCAGCCTTTTCCG                                                                           |
|                                                      |                |                 |                                                                                                                                                              |
| Caldalkalibacillus thermarum TA2.A1<br>ctg246        | AFCE01000164.1 | 32300-32383     | TAGTGCAAAGGATGTGATGAAGTGCAACTCTTAGTTGGGCGCCTGAGTTGCATGGAGCGAGTGGCGCAACCGGCCTTTACTTTT                                                                         |
|                                                      |                |                 |                                                                                                                                                              |
| Clostridium acetobutylicum ATCC<br>824               | AE001437.1     | 3752962-3752879 | TTAAGCGTTGGAGACTGTGAAGAATTTCTTGTATTGGGCACCTTAGAAAATTTGGAGTTAGTGGTGCAACCTGCCAACAATAAT                                                                         |
| Clostridium acetobutylicum ATCC<br>824               | AE001437.1     | 648479-648561   | TATTTGTTTGGAAACAATGATGAATTTCTTTAAATTGGGCACCTTGAGAAAATTTGAGTTAGTAGTGCAACCGACCAACGATTA                                                                         |
| Clostridium acetobutylicum DSM<br>1731               | CP002660.1     | 3754545-3754462 | TTAAGCGTTGGAGACTGTGAAGAATTTCTTGTATTGGGCACCTTAGAAAATTTGGAGTTAGTGGTGCAACCTGCCAACAATAAT                                                                         |
| Clostridium acetobutylicum DSM<br>1731               | CP002660.1     | 648465-648547   | TATTTGTTTGGAAACAATGATGAATTTCTTTAAATTGGGCACCTTGAGAAAATTTGAGTTAGTAGTGCAACCGACCAACGATTA                                                                         |
| Clostridium acetobutylicum EA 2018                   | CP002118.1     | 3752314-3752231 | TTAAGCGTTGGAGACTGTGAAGAATTTCTTGTATTGGGCACCTTAGAAAATTTGGAGTTAGTGGTGCAACCTGCCAACAATAAT                                                                         |

|                                                             |                |                 |                                                                                      |
|-------------------------------------------------------------|----------------|-----------------|--------------------------------------------------------------------------------------|
| Clostridium acetobutylicum EA 2018                          | CP002118.1     | 648092-648174   | TATTTGTTTGGAAACAATGATGAATTCCTTTAAATTGGGCACCTTGAGAAATTTGAGTTAGTAGTGCAACCGACCAACGATTA  |
| Clostridium beijerinckii NCIMB 8052                         | CP000721.1     | 1272636-1272718 | TGTATATAAGGAAACTGTGATTGGAATATTACTTGGGCACCTTTATATTCGATGAGTTAATAGTGCAACCGACCTTTTATTA   |
| Clostridium beijerinckii NCIMB 8052                         | CP000721.1     | 2207052-2207135 | ACAAAGATTGGGAACATGAAGAATTCTCTGTATTGGGCATCTTGAGAATTTAGAGTTAATGATGCAACCCACCAATCAAAAC   |
| Clostridium beijerinckii NCIMB 8052                         | CP000721.1     | 3552610-3552527 | AGACAATTGGAAGCGATGAAAAATTCTCTATATCTGGGCACCTTGAGAATTTGGAGCTAGTTGTGCAACCGACCAATTAAAC   |
| Clostridium beijerinckii NCIMB 8052                         | CP000721.1     | 4369760-4369677 | ATAGTAATTGAGAGCTATGAAGAATTCCTTTTATGTGGATATTTAAGAATTTTCGAGCTATCTGTGCAGTCGACCAATTTAAAC |
| Clostridium beijerinckii NCIMB 8052                         | CP000721.1     | 4868651-4868568 | TTGTCATAAGGAACTTTGATCCATATAITTTAATTGGGCACCTTTATATATGGTGAGTTAGTAGTGCAACCGACCTTTATATTT |
| Clostridium beijerinckii NCIMB 8052                         | CP000721.1     | 2550212-2550295 | ATTACAATTGGAAGCTATGAAGAATTCCTTCTAAGTGGGCACCTTAAGAGTTTGGAGCTAGTTGTGCAACCGACCAATTAAGAT |
| Clostridium botulinum B str. Eklund 17B                     | CP001056.1     | 3474048-3473965 | TATAAAGTTGGAGATTGTGAATAGTTCTCTTTATTTGGGCACCTTGAGAACTAGGAGTCAGTGGTGCACCCGGCCAACAAATTA |
| Clostridium botulinum E1 str. 'BoNT E Beluga' CLO.Contig141 | ACSC01000002.1 | 226862-226945   | TATAAAGTTGGAGATTATGAATAGTTCTCTTTATTTGGGCACCTTGAGAACTAGGAATCAGTGGTGCACCCGGCCAACAAATTA |
| Clostridium botulinum E3 str. Alaska E43                    | CP001078.1     | 3290558-3290475 | TATAAAGTTGGAGATTATGAATAGTTCTCTTTATTTGGGCACCTTGAGAACTAGGAATCAGTGGTGCACCCGGCCAACAAATTA |
| Clostridium butyricum 5521 gcontig_1106103650464            | ABDT01000076.2 | 17918-17835     | CATGTAGTTGGAAACGAAGAATAGTTCTCTCAATCTGGGCACCTTGGAACCTAGGAGTTAGTGGTGCACCCGCCAGCAAATTA  |
| Clostridium butyricum E4 str. BoNT E BL5262 CLP.Contig65    | ACOM01000005.1 | 2090470-2090387 | CATGTAGTTGGAAACGAAGAATAGTTCTCTCAATCTGGGCACCTTGGAACCTAGGAGTTAGTGGTGCACCCGCCAGCAAATTA  |
| Clostridium carboxidivorans P7 CLCAR0068                    | ADEK01000030.1 | 38999-39081     | ATTAAAAAGGAGACAAAGAAGTATACTTATATTTGGGCACCTTAAAGTATACAGAGTCAATGGTGCACCGACCTGATTTTAC   |
| Clostridium carboxidivorans P7 CLCAR0092                    | ADEK01000042.1 | 6399-6480       | TATTATATTGGAAGCGTTGAACTACATACTTAATTGGGCACCTTTGTATGTAGGAAGCAGCTAGTGCAACCGGCCAATATTG   |
| Clostridium carboxidivorans P7 CLCAR0098                    | ADEK01000045.1 | 227536-227619   | AAAAAAGTGCAAACTGTGAAAAATTATCTTTATTTGGGCACCTTGGAAGATTTAGAGTTAGTAGTGACCGGCCAATAATTAG   |
| Clostridium carboxidivorans P7 CLCAR0098                    | ADEK01000045.1 | 229397-229480   | TTAAAAATGGAACTGTGAAAAATTCTCTTTACTTGGGCACCTTGGAAGATTTAGAGTTAGTAGTGCAACCGGCCAATAATTAG  |

|                                                                                |                |               |                                                                                        |
|--------------------------------------------------------------------------------|----------------|---------------|----------------------------------------------------------------------------------------|
| Clostridium carboxidivorans P7<br>ctg00111                                     | ACVI01000071.1 | 13890-13972   | ATTAAAAAGGAGACAAAGAAGTATACTTATATTTGGGCACCTTAAAGTATACAGAGTCAATGGTGCAACCGACCTGATTTTAC    |
| Clostridium carboxidivorans P7<br>ctg00119                                     | ACVI01000016.1 | 6410-6491     | TATTATATTGGAAGCGTTGAACTACATACTTAATTGGGCACCTTGTATGTAGGAAGCAGCTAGTGCAACCGGCCAAATATTG     |
| Clostridium carboxidivorans P7<br>ctg00129                                     | ACVI01000032.1 | 43884-43967   | TTAAAAATGGAACTGTGAAAAATTCTCTTTACTTGGGCACCTTGAGAATTTAGAGTTAGTAGTGCAACCGGCCAATAATTAG     |
| Clostridium carboxidivorans P7<br>ctg00129                                     | ACVI01000032.1 | 42023-42106   | AAAAAAGTGCAAACTGTGAAAAATTATCTTTATTTGGGCACCTTGAGAATTTAGAGTTAGTAGTGCAGCCGGCCAATAATTAG    |
| Clostridium carboxidivorans P7<br>ctg00174                                     | ACVI01000001.1 | 117963-117880 | TATGTCTTGGGAAATTATGAGCTATATACTTAATTGGGCACCTTGTATATAGGGAGTTATTAGTGCAACCGGCCGAATATTTA    |
| Clostridium difficile 002-P50-2011<br>C_difficile002-P50-2011-1.0_Cont10.<br>1 | AGAA01000010.1 | 148931-148846 | AAATATTATAGAGATGTTGAAGTATAITCTATTATTGGGCACCTTATGGATATACTGAGTCAGTGGTGCAACCGGCTATGAATATA |
| Clostridium difficile 002-P50-2011<br>C_difficile002-P50-2011-1.0_Cont29.<br>1 | AGAA01000024.1 | 52133-52216   | AATATTTTAGAACTGAGAAGTATATCTTATTATTGGGCATCTGGAGATATATGGAGTTAGTGGTGCAACCGGCTATGAATATA    |
| Clostridium difficile 002-P50-2011<br>C_difficile002-P50-2011-1.0_Cont29.<br>1 | AGAA01000024.1 | 81221-81306   | CCTATTTATAGAACTGTGAAGTATATCTTAAACTTGGGCACCTTAAAAGATATATGGAGTTAGTAGTGCAACCTGCTATAAATATA |
| Clostridium difficile 002-P50-2011<br>C_difficile002-P50-2011-1.0_Cont4.1      | AGAA01000005.1 | 96603-96518   | TAATAAAATAGAAACGTTGATTATGTTCTGCAATGTGGGCACCTTGGAGCATAITGAGTTAGTGGTGCAACCGGCTATGAAATTG  |
| Clostridium difficile 050-P50-2011<br>C_difficile050-P50-201-1.0_Cont30.1      | AGAB01000014.1 | 95548-95633   | AAATATTATAGAGATGTTGAAGTATATCTTATTATTGGGCACCTTATGGATATACTGAGTCAGTGGTGCAACCGGCTATGAATATA |
| Clostridium difficile 050-P50-2011<br>C_difficile050-P50-201-1.0_Cont38.1      | AGAB01000020.1 | 885-800       | CCTATTTATAGAACTGTGAAGTATATCTTAAACTTGGGCACCTTAAAAGATATATGGAGTTAGTAGTGCAACCTGCTATAAATATA |

|                                                                            |                |                 |                                                                                          |
|----------------------------------------------------------------------------|----------------|-----------------|------------------------------------------------------------------------------------------|
| Clostridium difficile 050-P50-2011<br>C_difficile050-P50-201-1.0_Cont402.1 | AGAB01000071.1 | 96600-96515     | TAATAAAATAGAAACGTTGATTATGTTCTGCAATGTGGGCACCTTGGAGCATATTGAGTTAGTGGTGCAACCGGCTATGAAATTG    |
| Clostridium difficile 050-P50-2011<br>C_difficile050-P50-201-1.0_Cont73.1  | AGAB01000034.1 | 29728-29645     | AATATTTTAGAAACTGAGAAGTATATCTTATTATTGGGCATCTGGAGATATATGGAGTTAGTGGTGCAACCGGCTATGAATATA     |
| Clostridium difficile 630 complete<br>genome                               | AM180355.1     | 3801149-3801064 | CCTATTTATAGAAACTGTGAAGTATATCTTAAACCTGGGCACCTTAAAAGATATATGGAGTTAGTAGTGCAACCTGCTATAAAATATA |
| Clostridium difficile 630 complete<br>genome                               | AM180355.1     | 4105882-4105797 | TAATAAAATAGAAACGTTGATTATGTTCTGTAATGTGGGCACCTTGGAGCATATTGAGTTAGTGGTGCAACCGGCTATGAAATTG    |
| Clostridium difficile 630 complete<br>genome                               | AM180355.1     | 3306767-3306682 | AAATATTATAGAGATGTTGAAGTATATCTTATTATTGGGCACCTTATGGATATACTGAGTCAGTGGTGCAACCGGCTATGAATATA   |
| Clostridium difficile 630 complete<br>genome                               | AM180355.1     | 3826693-3826610 | AATATTTTAGAAACTGAGAAGTATATCTTATTATTGGGCATCTGGAGATATATGGAGTTAGTGGTGCAACCGGCTATGAATATA     |
| Clostridium difficile 6407<br>contig_1271                                  | ADEH01001271.1 | 574-491         | AATATTTTAGAAACTGAGAAGTATATCTTATTATTGGGCATCTGGAGATATATGGAGTTAGTGGTGCAACCGGCTATGAATATA     |
| Clostridium difficile 6407<br>contig_2804                                  | ADEH01002804.1 | 453-368         | AAATATTATAGAGATGTTGAAGTATATCTTATTATTGGGCACCTTATGGATATACTGAGTCAGTGGTGCAACCGGCTATGAATATA   |
| Clostridium difficile 6407<br>contig_3694                                  | ADEH01003694.1 | 909-824         | CCTATTTATAGAAACTGTGAAGTATATCTTAAACCTGGGCACCTTAAAAGATATATGGAGTTAGTAGTGCAACCTGCTATAAAATATA |
| Clostridium difficile 6407 contig_511                                      | ADEH01000511.1 | 3693-3778       | TAATAAAATAGAAACGTTGATTATGTTCTGTAATGTGGGCACCTTGGAGCATATTGAGTTAGTGGTGCAACCGGCTATGAAATTG    |
| Clostridium difficile 6466 contig_124                                      | ADDE01000124.1 | 18557-18640     | AATATTTTAGAAACTGAGAAGTATATCTTATTATTGGGCATCTAGAGATATATGGAGTTAGTGGTGCAACCGGCTATGAATATA     |
| Clostridium difficile 6466 contig_241                                      | ADDE01000240.1 | 16776-16861     | CCTATTTATAGAAACTGTGAAGTATATCTTAAACTTGGGCACCTTAAAAGATATATGGAGTTAGTAGTGCAACCTGCTATAAAATATA |
| Clostridium difficile 6466 contig_27                                       | ADDE01000027.1 | 30384-30469     | TAATAAAATAGAAACGTTGATTATGTTCTGTAATGTGGGCACCTTGGAGCATATTGAGTTAGTGGTGCAACCGGCTATGAAATTG    |
| Clostridium difficile 6466 contig_319                                      | ADDE01000318.1 | 28737-28822     | AAATATTATAGAGATGTTGAAGTATATCTTATTATTGGGCACCTTATGGATATACTGAGTCAGTGGTGCAACCGGCTATGAATATA   |
| Clostridium difficile 6503 contig_1                                        | ADEI01000001.1 | 126371-126454   | AATATTTTAGAAACTGAGAAGTATATCTTATTATTGGGCATCTGGAGATATATGGAGTTAGTGGTGCAACCGGCTATGAATATA     |



|                                                                           |                |                 |                                                                                         |
|---------------------------------------------------------------------------|----------------|-----------------|-----------------------------------------------------------------------------------------|
| Clostridium difficile 6503 contig_48                                      | ADEI01000048.1 | 13134-13219     | AAATATTATAGAGATGTTGAAGTATAITCTATTATTGGGCACCTTATGGATATACTGAGTCAGTGGTGCAACCGGCTATGAATATA  |
| Clostridium difficile 6503 contig_7                                       | ADEI01000007.1 | 41296-41381     | TAATAAAATAGAAACGTTGATTATGTTCTGTAATGTGGGCACCTTGGAGCATATTGAGTTAGTGGTGCAACCGGCTATGAAATTG   |
| Clostridium difficile 6503 contig_82                                      | ADEI01000082.1 | 16823-16908     | CCTATTTATAGAAACTGTGAAGTATATCTTAAACCTGGGCACCTTAAAAGATATATGGAGTTAGTAGTGCAACCTGCTATAAATATA |
| Clostridium difficile 6534 contig_293                                     | ADEJ01000293.1 | 9201-9284       | AATATTTTAGAAACTGAGAAGTATATCTTATTATTGGGCATCTGGAGATATATGGAGTTAGTGGTGCAACCGGCTATGAATATA    |
| Clostridium difficile 6534 contig_84                                      | ADEJ01000084.1 | 1487-1572       | TAATAAAATAGAAACGTTGATTATGTTCTGTAATGTGGGCACCTTGGAGCATATTGAGTTAGTGGTGCAACCGGCTATGAAATTG   |
| Clostridium difficile 6534 contig_880                                     | ADEJ01000880.1 | 9852-9937       | CCTATTTATAGAAACTGTGAAGTATATCTTAAACCTGGGCACCTTAAAAGATATATGGAGTTAGTAGTGCAACCTGCTATAAATATA |
| Clostridium difficile 6534 contig_962                                     | ADEJ01000962.1 | 5974-6059       | AAATATTATAGAGATGTTGAAGTATAITCTATTATTGGGCACCTTATGGATATACTGAGTCAGTGGTGCAACCGGCTATGAATATA  |
| Clostridium difficile 70-100-2010<br>C_difficile70-100-2010-1.0_Cont169.1 | AGAC01000077.1 | 95005-94920     | TAATAAAATAGAAACGTTGATTATGTTCTGTAATGTGGGCACCTTGGAGCATATTGAGTTAGTGGTGCAACCGGCTATGAAATTG   |
| Clostridium difficile 70-100-2010<br>C_difficile70-100-2010-1.0_Cont28.1  | AGAC01000024.1 | 77687-77772     | CCTATTTATAGAAACTGTGAAGTATATCTTAAACCTGGGCACCTTAAAAGATATATGGAGTTAGTAGTGCAACCTGCTATAAATATA |
| Clostridium difficile 70-100-2010<br>C_difficile70-100-2010-1.0_Cont28.1  | AGAC01000024.1 | 52149-52232     | AATATTTTAGAAACTGAGAAGTATATCTTATTATTGGGCATCTGGAGATATATGGAGTTAGTGGTGCAACCGGCTATGAATATA    |
| Clostridium difficile 70-100-2010<br>C_difficile70-100-2010-1.0_Cont38.1  | AGAC01000036.1 | 13084-13169     | AAATATTATAGAGATGTTGAAGTATAITCTATTATTGGGCACCTTATGGATATACTGAGTCAGTGGTGCAACCGGCTATGAATATA  |
| Clostridium difficile ATCC 43255<br>contig00019_2                         | ABKJ02000019.1 | 632185-632100   | CCTATTTATAGAAACTGTGAAGTATATCTTAAACCTGGGCACCTTAAAAGATATATGGAGTTAGTAGTGCAACCTGCTATAAATATA |
| Clostridium difficile ATCC 43255<br>contig00019_2                         | ABKJ02000019.1 | 148505-148420   | AAATATTATAGAGATGTTGAAGTATAITCTATTATTGGGCACCTTATGGATATACTGAGTCAGTGGTGCAACCGGCTATGAATATA  |
| Clostridium difficile ATCC 43255<br>contig00020_2                         | ABKJ02000020.1 | 17357-17274     | AATATTTTAGAAACTGAGAAGTATATCTTATTATTGGGCATCTAGAGATATATGGAGTTAGTGGTGCAACCGGCTATGAATATA    |
| Clostridium difficile ATCC 43255<br>contig00021_2                         | ABKJ02000021.1 | 96423-96338     | TAATAAAATAGAAACGTTGATTATGTTCTGTAATGTGGGCACCTTGGAGCATATTGAGTTAGTGGTGCAACCGGCTATGAAATTG   |
| Clostridium difficile BII chromosome                                      | FN668941.1     | 3663876-3663793 | AATATTTTAGAAACTGAGAAGTATATCTTATTATTGGGCATCTGGAGATATATGGAGTTAGTGGTGCAACCGGCTATGAATATA    |

|                                                |                |                 |                                                                                         |
|------------------------------------------------|----------------|-----------------|-----------------------------------------------------------------------------------------|
| Clostridium difficile B11 chromosome           | FN668941.1     | 3147948-3147863 | AAATATTATAGAGATGTTGAAGTATAITCTATTATTGGGCACCTTATGGATATACTGAGTCAGTGGTGCAACCGGCTATGAATATA  |
| Clostridium difficile B11 chromosome           | FN668941.1     | 3913917-3913832 | TAATAAAATAGAAACGTTGATTATGTTCTGTAATGTGGGCACCTTAGAGCATATTGAGTTAGTGGTGCAACCGGCTATGAAATTG   |
| Clostridium difficile B19 chromosome           | FN668944.1     | 3814731-3814646 | TAATAAAATAGAAACGTTGATTATGTTCTGTAATGTGGGCACCTTGGAGCATATTGAGTTAGTGGTGCAACCGGCTATGAAATTG   |
| Clostridium difficile B19 chromosome           | FN668944.1     | 3022353-3022268 | AAATATTATAGAGATGTTGAAGTATAITCTATTATTGGGCACCTTATGGATATACTGAGTCAGTGGTGCAACCGGCTATGAATATA  |
| Clostridium difficile B19 chromosome           | FN668944.1     | 3514141-3514058 | AATATTTTAGAAACTGAGAAGTATATCTTATTATTGGGCATCTAGAGATATATGGAGTTAGTGGTGCAACCGGCTATGAATATA    |
| Clostridium difficile B19 chromosome           | FN668944.1     | 3488594-3488509 | CCTATTTATAGAAACTGTGAAGTATATCTTAAACCTGGGCACCTTAAAAGATATATGGAGTTAGTAGTGCAACCTGCTATAAATATA |
| Clostridium difficile CD196 complete genome    | FN538970.1     | 3905897-3905812 | TAATAAAATAGAAACGTTGATTATGTTCTGTAATGTGGGCACCTTAGAGCATATTGAGTTAGTGGTGCAACCGGCTATGAAATTG   |
| Clostridium difficile CD196 complete genome    | FN538970.1     | 3139996-3139911 | AAATATTATAGAGATGTTGAAGTATAITCTATTATTGGGCACCTTATGGATATACTGAGTCAGTGGTGCAACCGGCTATGAATATA  |
| Clostridium difficile CD196 complete genome    | FN538970.1     | 3655856-3655773 | AATATTTTAGAAACTGAGAAGTATATCTTATTATTGGGCATCTGGAGATATATGGAGTTAGTGGTGCAACCGGCTATGAATATA    |
| Clostridium difficile CIP 107932 contig00032_2 | ABKK02000032.1 | 8674-8589       | AAATATTATAGAGATGTTGAAGTATAITCTATTATTGGGCACCTTATGGATATACTGAGTCAGTGGTGCAACCGGCTATGAATATA  |
| Clostridium difficile CIP 107932 contig00035_2 | ABKK02000035.1 | 46456-46373     | AATATTTTAGAAACTGAGAAGTATATCTTATTATTGGGCATCTGGAGATATATGGAGTTAGTGGTGCAACCGGCTATGAATATA    |
| Clostridium difficile CIP 107932 contig00038_2 | ABKK02000038.1 | 57364-57279     | TAATAAAATAGAAACGTTGATTATGTTCTGTAATGTGGGCACCTTAGAGCATATTGAGTTAGTGGTGCAACCGGCTATGAAATTG   |
| Clostridium difficile complete genome          | FN665653.1     | 3637731-3637648 | AATATTTTAGAAACTGAGAAGTATATCTTATTATTGGGCATCTAGAGATATATGGAGTTAGTGGTGCAACCGGCTATGAATATA    |
| Clostridium difficile complete genome          | FN665653.1     | 3163955-3163870 | AAATATTATAGAGATGTTGAAGTATAITCTATTATTGGGCACCTTATGGATATACTGAGTCAGTGGTGCAACCGGCTATGAATATA  |
| Clostridium difficile complete genome          | FN665653.1     | 3612592-3612507 | CCTATTTATAGAAACTGTGAAGTATATCTTAAACTTGGGCACCTTAAAAGATATATGGAGTTAGTAGTGCAACCTGCTATAAATATA |
| Clostridium difficile complete genome          | FN665653.1     | 3870483-3870398 | TAATAAAATAGAAACGTTGATTATGTTCTGTAATGTGGGCACCTTGGAGCATATTGAGTTAGTGGTGCAACCGGCTATGAAATTG   |
| Clostridium difficile complete genome          | FN665652.1     | 3717144-3717059 | CCTATTTATAGAAACTGTGAAGTATATCTTAAACTTGGGCACCTTAAAAGATATATGGAGTTAGTAGTGCAACCTGCTATAAATATA |
| Clostridium difficile complete genome          | FN665652.1     | 3973905-3973820 | TAATAAAATAGAAACGTTGATTATGTTCTGCAATGTGGGCACCTTGGAGCATATTGAGTTAGTGGTGCAACCGGCTATGAAATTG   |
| Clostridium difficile complete genome          | FN665652.1     | 3201659-3201574 | AAATATTATAGAGATGTTGAAGTATAITCTATTATTGGGCACCTTATGGATATACTGAGTCAGTGGTGCAACCGGCTATGAATATA  |

|                                            |                |                 |                                                                                        |
|--------------------------------------------|----------------|-----------------|----------------------------------------------------------------------------------------|
| Clostridium difficile complete genome      | FN665652.1     | 3746232-3746149 | AATATTTTAGAACTGAGAAGTATATCTTATTATTGGGCATCTGGAGATATATGGAGTTAGTGGTGCAACCGGCTATGAATATA    |
| Clostridium difficile complete genome      | FN665654.1     | 3675328-3675245 | AATATTTTAGAACTGAGAAGTATATCTTATTATTGGGCATCTGGAGATATATGGAGTTAGTGGTGCAACCGGCTATGAATATA    |
| Clostridium difficile complete genome      | FN665654.1     | 3975213-3975128 | TAATAAAATAGAAACGTTGATTATGTTCTGTAATGTGGGCACCTTAGAGCATATTGAGTTAGTGGTGCAACCGGCTATGAAATTG  |
| Clostridium difficile complete genome      | FN665654.1     | 3159482-3159397 | AAATATTATAGAGATGTTGAAGTATAITCTATTATTGGGCACCTTATGGATATACTGAGTCAGTGGTGCAACCGGCTATGAATATA |
| Clostridium difficile M68                  | FN668375.1     | 3178755-3178670 | AAATATTATAGAGATGTTGAAGTATAITCTATTATTGGGCACCTTATGGATATACTGAGTCAGTGGTGCAACCGGCTATGAATATA |
| Clostridium difficile M68                  | FN668375.1     | 3694212-3694127 | CCTATTTATAGAACTGTGAAGTATATCTTAACTTGGGCACCTTAAAAGATATATGGAGTTAGTAGTGCAACCTGCTATAAATATA  |
| Clostridium difficile M68                  | FN668375.1     | 3978970-3978885 | TAATAAAATAGAAACGTTGATTATGTTCTGCAATGTGGGCACCTTGGAGCATATTGAGTTAGTGGTGCAACCGGCTATGAAATTG  |
| Clostridium difficile M68                  | FN668375.1     | 3723299-3723216 | AATATTTTAGAACTGAGAAGTATATCTTATTATTGGGCATCTGGAGATATATGGAGTTAGTGGTGCAACCGGCTATGAATATA    |
| Clostridium difficile NAP07<br>contig00010 | ADVM01000006.1 | 61886-61971     | AAATATTATAGAGATGTTGAAGTATAITCTATTATTGGGCACCTTATGGATATACTGAGTCAGTGGTGCAACCGGCTATGAATATA |
| Clostridium difficile NAP07<br>contig00213 | ADVM01000057.1 | 19350-19265     | CCTATTTATAGAACTGTGAAGTATATCTTAACTTGGGCACCTTAAAAGATATATGGAGTTAGTAGTGCAACCTGCTATAAATATA  |
| Clostridium difficile NAP07<br>contig00215 | ADVM01000059.1 | 209-126         | AATATTTTAGAACTGAGAAGTATATCTTATTATTGGGCATCTAGAGATATATGGAGTTAGTGGTGCAACCGGCTATGAATATA    |
| Clostridium difficile NAP07<br>contig00217 | ADVM01000061.1 | 94959-94874     | TAATAAAATAGAAACGTTGATTATGTTCTGTAATGTGGGCACCTTGGAGCATATTGAGTTAGTGGTGCAACCGGCTATGAAATTG  |
| Clostridium difficile NAP08<br>contig00002 | ADNX01000002.1 | 90348-90263     | TAATAAAATAGAAACGTTGATTATGTTCTGTAATGTGGGCACCTTGGAGCATATTGAGTTAGTGGTGCAACCGGCTATGAAATTG  |
| Clostridium difficile NAP08<br>contig00102 | ADNX01000076.1 | 39666-39749     | AATATTTTAGAACTGAGAAGTATATCTTATTATTGGGCATCTAGAGATATATGGAGTTAGTGGTGCAACCGGCTATGAATATA    |
| Clostridium difficile NAP08<br>contig00103 | ADNX01000077.1 | 14622-14707     | CCTATTTATAGAACTGTGAAGTATATCTTAACTTGGGCACCTTAAAAGATATATGGAGTTAGTAGTGCAACCTGCTATAAATATA  |
| Clostridium difficile NAP08<br>contig00115 | ADNX01000089.1 | 61865-61950     | AAATATTATAGAGATGTTGAAGTATAITCTATTATTGGGCACCTTATGGATATACTGAGTCAGTGGTGCAACCGGCTATGAATATA |
| Clostridium difficile QCD-23m63            | ABKL02000031.1 | 22961-22876     | AAATATTATAGAGATGTTGAAGTATAITCTATTATTGGGCACCTTATGGATATACTGAGTCAGTGGTGCAACCGGCTATGAATATA |

|                                                               |                |                 |                                                                                        |
|---------------------------------------------------------------|----------------|-----------------|----------------------------------------------------------------------------------------|
| contig00031_2                                                 |                |                 |                                                                                        |
| Clostridium difficile QCD-23m63<br>contig00036_2              | ABKL02000036.1 | 888-803         | CCTATTTATAGAAACTGTGAAGTATATCTTAACTTGGGCACTTAAAAGATATATGGAGTTAGTAGTGCAACCTGCTATAAATATA  |
| Clostridium difficile QCD-23m63<br>contig00037_2              | ABKL02000037.1 | 208-125         | AATATTTTAGAAACTGAGAAGTATATCTTATTATTGGGCATCTAGAGATATATGGAGTTAGTGGTGCAACCGGCTATGAATATA   |
| Clostridium difficile QCD-23m63<br>contig00040_2              | ABKL02000040.1 | 94961-94876     | TAATAAAATAGAAACGTTGATTATGTTCTGTAATGTGGGCACCTTGGAGCATATTGAGTTAGTGGTGCAACCGGCTATGAAATTG  |
| Clostridium difficile QCD-32g58<br>C_difficile_bld4_cont00014 | AAML04000014.1 | 1152543-1152460 | AATATTTTAGAAACTGAGAAGTATATCTTATTATTGGGCATCTGGAGATATATGGAGTTAGTGGTGCAACCGGCTATGAATATA   |
| Clostridium difficile QCD-32g58<br>C_difficile_bld4_cont00014 | AAML04000014.1 | 638715-638630   | AAATATTATAGAGATGTTGAAGTATATTCTATTATTGGGCACCTTATGGATATACTGAGTCAGTGGTGCAACCGGCTATGAATATA |
| Clostridium difficile QCD-32g58<br>C_difficile_bld4_cont00015 | AAML04000015.1 | 157646-157561   | TAATAAAATAGAAACGTTGATTATGTTCTGTAATGTGGGCACCTTAGAGCATATTGAGTTAGTGGTGCAACCGGCTATGAAATTG  |
| Clostridium difficile QCD-37x79<br>contig00023_2              | ABHG02000023.1 | 152397-152312   | AAATATTATAGAGATGTTGAAGTATATTCTATTATTGGGCACCTTATGGATATACTGAGTCAGTGGTGCAACCGGCTATGAATATA |
| Clostridium difficile QCD-37x79<br>contig00025_2              | ABHG02000025.1 | 45887-45804     | AATATTTTAGAAACTGAGAAGTATATCTTATTATTGGGCATCTGGAGATATATGGAGTTAGTGGTGCAACCGGCTATGAATATA   |
| Clostridium difficile QCD-37x79<br>contig00027_2              | ABHG02000027.1 | 57971-57886     | TAATAAAATAGAAACGTTGATTATGTTCTGTAATGTGGGCACCTTAGAGCATATTGAGTTAGTGGTGCAACCGGCTATGAAATTG  |
| Clostridium difficile QCD-63q42<br>contig00026_2              | ABHD02000026.1 | 148456-148371   | AAATATTATAGAGATGTTGAAGTATATTCTATTATTGGGCACCTTATGGATATACTGAGTCAGTGGTGCAACCGGCTATGAATATA |
| Clostridium difficile QCD-63q42<br>contig00027_2              | ABHD02000027.1 | 195004-194919   | CCTATTTATAGAAACTGTGAAGTATATCTTAAACCTGGGCACTTAAAAGATATATGGAGTTAGTAGTGCAACCTGCTATAAATATA |
| Clostridium difficile QCD-63q42<br>contig00028_2              | ABHD02000028.1 | 4862-4779       | AATATTTTAGAAACTGAGAAGTATATCTTATTATTGGGCATCTAGAGATATATGGAGTTAGTGGTGCAACCGGCTATGAATATA   |

|                                               |                |                 |                                                                                        |
|-----------------------------------------------|----------------|-----------------|----------------------------------------------------------------------------------------|
| Clostridium difficile QCD-63q42 contig00030_2 | ABHD02000030.1 | 99563-99478     | TAATAAAATAGAAACGTTGATTATGTTCTGTAATGTGGGCACCTTGAGCATATTGAGTTAGTGGTGCAACCGGCTATGAAATTG   |
| Clostridium difficile QCD-66c26 contig00011_2 | ABFD02000011.1 | 154500-154415   | AAATATTATAGAGATGTTGAAGTATAITCTATTATTGGGCACCTTATGGATATACTGAGTCAGTGGTGCAACCGGCTATGAATATA |
| Clostridium difficile QCD-66c26 contig00012_2 | ABFD02000012.1 | 144463-144380   | AATATTTTAGAACTGAGAAGTATATCTTATTATTGGGCATCTGGAGATATATGGAGTTAGTGGTGCAACCGGCTATGAATATA    |
| Clostridium difficile QCD-66c26 contig00014_2 | ABFD02000014.1 | 57540-57455     | TAATAAAATAGAAACGTTGATTATGTTCTGTAATGTGGGCACCTTAGAGCATATTGAGTTAGTGGTGCAACCGGCTATGAAATTG  |
| Clostridium difficile QCD-76w55 contig00034_2 | ABHE02000034.1 | 9730-9645       | AAATATTATAGAGATGTTGAAGTATAITCTATTATTGGGCACCTTATGGATATACTGAGTCAGTGGTGCAACCGGCTATGAATATA |
| Clostridium difficile QCD-76w55 contig00037_2 | ABHE02000037.1 | 108247-108164   | AATATTTTAGAACTGAGAAGTATATCTTATTATTGGGCATCTGGAGATATATGGAGTTAGTGGTGCAACCGGCTATGAATATA    |
| Clostridium difficile QCD-76w55 contig00039_2 | ABHE02000039.1 | 57574-57489     | TAATAAAATAGAAACGTTGATTATGTTCTGTAATGTGGGCACCTTAGAGCATATTGAGTTAGTGGTGCAACCGGCTATGAAATTG  |
| Clostridium difficile QCD-97b34 contig00037_2 | ABHF02000037.1 | 8669-8584       | AAATATTATAGAGATGTTGAAGTATAITCTATTATTGGGCACCTTATGGATATACTGAGTCAGTGGTGCAACCGGCTATGAATATA |
| Clostridium difficile QCD-97b34 contig00040_2 | ABHF02000040.1 | 233611-233528   | AATATTTTAGAACTGAGAAGTATATCTTATTATTGGGCATCTGGAGATATATGGAGTTAGTGGTGCAACCGGCTATGAATATA    |
| Clostridium difficile QCD-97b34 contig00042_2 | ABHF02000042.1 | 57542-57457     | TAATAAAATAGAAACGTTGATTATGTTCTGTAATGTGGGCACCTTAGAGCATATTGAGTTAGTGGTGCAACCGGCTATGAAATTG  |
| Clostridium difficile R20291 complete genome  | FN545816.1     | 3986683-3986598 | TAATAAAATAGAAACGTTGATTATGTTCTGTAATGTGGGCACCTTAGAGCATATTGAGTTAGTGGTGCAACCGGCTATGAAATTG  |
| Clostridium difficile R20291 complete genome  | FN545816.1     | 3220524-3220439 | AAATATTATAGAGATGTTGAAGTATAITCTATTATTGGGCACCTTATGGATATACTGAGTCAGTGGTGCAACCGGCTATGAATATA |
| Clostridium difficile R20291 complete         | FN545816.1     | 3736631-3736548 | AATATTTTAGAACTGAGAAGTATATCTTATTATTGGGCATCTGGAGATATATGGAGTTAGTGGTGCAACCGGCTATGAATATA    |

|                                                                   |                |                 |                                                                                        |
|-------------------------------------------------------------------|----------------|-----------------|----------------------------------------------------------------------------------------|
| genome                                                            |                |                 |                                                                                        |
| Clostridium kluyveri DSM 555                                      | CP000673.1     | 1160200-1160286 | CAAATTGAGGGGAACGATGAGGTACACACTTTAATTTGGGCATCCTTGTGTGATTGGAGTTAGTGATGCAACCGACCTGTATTCA  |
| Clostridium kluyveri NBRC 12016<br>DNA                            | AP009049.1     | 1160074-1160160 | CAAATTGAGGGGAACGATGAGGTACACACTTTAATTTGGGCATCCTTGTGTGATTGGAGTTAGTGATGCAACCGACCTGTATTCA  |
| Clostridium ljungdahlii DSM 13528                                 | CP001666.1     | 409921-410004   | TAATGTAAAGGAAACTATGATATATATGCCGTAATTTGGGTATCAGACATATACGGAGTTAATGATACAACCGACCTTACATCT   |
| Clostridium ljungdahlii DSM 13528                                 | CP001666.1     | 1584482-1584399 | GAAAATATGGGAAACTATGAAAAATTTCTTCTAATTGGGCACCTTGGAAATTTGGAGTTAATAGTGCAACCGGCCAGCTATATA   |
| Clostridium ljungdahlii DSM 13528                                 | CP001666.1     | 990420-990503   | TTAAAAGTTGAAAACAATGAAAAATTTCTTATAATTGGGCACCTGGAGGATTGGAGTTAGTGGTGCAACCTGCCAATAGTCGA    |
| Clostridium novyi NT                                              | CP000382.1     | 1875256-1875172 | TTTTTAAAAGGAGACATTTGAACTATATACTTTATTTGGGCACCTTGTATATAGGGAGTCATTAGTGCAACCGACCTTATTTTAT  |
| Clostridium perfringens ATCC 13124                                | CP000246.1     | 171340-171423   | AAATGTTATAGAAACGTTGATGTATATTCTGTATTTGGGCATCTGGAATATGCTGAGTTAGTGATGCAACCGACTATATTTATA   |
| Clostridium perfringens B str. ATCC<br>3626 gcontig_1106202603824 | ABDV01000011.1 | 27277-27360     | AAATGTTATAGAAACGTTGATGTATATTCTGTATTTGGGCATCTGGAATATGCTGAGTTAGTGATGCAACCGACTATATTTATA   |
| Clostridium perfringens C str.<br>JGS1495 gcontig_1106166512733   | ABDU01000054.2 | 14999-15082     | AAATGTTATAGAAACGTTGATGTATATTCTGTATTTGGGCATCTGGAATATGCTGAGTTAGTGATGCAACCGACTATATTTATA   |
| Clostridium perfringens CPE str.<br>F4969 gcontig_1106202596980   | ABDX01000006.1 | 72290-72207     | AAATGTTATAGAAACGTTGATGTATATTCTGTATTTGGGCATCTGGAATATGCTGAGTTAGTGATGCAACCGACTATATTTATA   |
| Clostridium perfringens D str.<br>JGS1721 gcontig_1108490431717   | ABOO01000009.1 | 68696-68613     | AAATGTTATAGAAACGTTGATGTATATTCTGTATTTGGGCATCTGGAATATGCTGAGTTAGTGATGCAACCGACTATATTTATA   |
| Clostridium perfringens E str.<br>JGS1987 gcontig_1106202897272   | ABDW01000009.1 | 70792-70709     | AAATGTTATAGAAACGTTGATGTATATTCTGTATTTGGGCATCTGGAATATGCTGAGTTAGTGATGCAACCGACTATATTTATA   |
| Clostridium perfringens NCTC 8239<br>gcontig_1106202603744        | ABDY01000009.1 | 15518-15601     | AAATGTTATAGAAACGTTGATGTATATTCTGTATTTGGGCATCTGGAATATGCTGAGTTAGTGATGCAACCGACTATATTTATA   |
| Clostridium perfringens SM101                                     | CP000312.1     | 175590-175672   | ATATGTTATAGAAACGTTGATGTATATTCTGTATTTGGGCATCTGGAATATGCTGAGTTAGTGATGCAACCGACTATATTTAT    |
| Clostridium perfringens str. 13 DNA                               | BA000016.3     | 197260-197343   | AAATGTTATAGAAACGTTGATGTATATTCTGTATTTGGGCATCTGGAATATGCTGAGTTAGTGATGCAACCGACTATATTTATA   |
| Clostridium sp. DL-VIII<br>CDLVIIIIscaffold_1_Cont1               | AFWX01000001.1 | 1837525-1837609 | TTTTATTAAGGAAACTATGATCCATATATTTTATTTTGGGCACCTTTATATATGGTGAGTTAGCAGTGCAACCGACCTTTATGATT |

|                                                     |                |                 |                                                                                         |
|-----------------------------------------------------|----------------|-----------------|-----------------------------------------------------------------------------------------|
| Clostridium sp. DL-VIII<br>CDLVIIIIscaffold_1_Cont2 | AFWX01000002.1 | 2459932-2459851 | AATCAATATGGAAACAATGATTCATATATTTATTTGGGCACCTTATATATGAGGAGTTAGTAGTGCAACCGGCCTTTGTTT       |
| Clostridium sp. DL-VIII<br>CDLVIIIIscaffold_1_Cont2 | AFWX01000002.1 | 560316-560399   | ATATAAATTGGACACTATGATAAGTTTTCTGTATTTGGGTACCTGGATAACTTTGAGTGATTGGTACAACCGACCAGCATAAAA    |
| Clostridium sp. DL-VIII<br>CDLVIIIIscaffold_1_Cont2 | AFWX01000002.1 | 2392283-2392202 | AATTAAGTTGGAAATGTTGAAGGATCTCCTTATTTGGGCACCTTGGGGATTGGAGTTAATGGTGCAACCGGCCAATGATT        |
| Clostridium sp. DL-VIII<br>CDLVIIIIscaffold_1_Cont2 | AFWX01000002.1 | 2464246-2464163 | ACACGGATTGGGAACGTGTGAGGGATTCTCTCTATTTGGGCATCTGGAGGATTCTTAGTTAATGATGCAACCGCCAATCAAAAC    |
| Clostridium sp. DL-VIII<br>CDLVIIIIscaffold_1_Cont2 | AFWX01000002.1 | 1791131-1791049 | ATAAACTTGAAGCTGTGAAGAATTCTTTATGTGGGCACCTTAGGAATTTGGAGCTAGTTGTGCAACCGCCAATTTAAAC         |
| Clostridium sp. DL-VIII<br>CDLVIIIIscaffold_1_Cont2 | AFWX01000002.1 | 1580959-1580876 | AAAAAATGTGGAAACGGTGAAAAATTCTCTCTATATGGGCACCTTGAGAATTTGGAGTTAATAGTGCAACCGACCAATTTAAGC    |
| Clostridium sp. DL-VIII<br>CDLVIIIIscaffold_1_Cont2 | AFWX01000002.1 | 1699465-1699382 | ATGTAAATTGGAAGCTGTGAAAAACTTTCTTATTTGGGCACATTGAGAGTTTAGAGCTAGTTGTGCAACCGACCAATTAAT       |
| Clostridium sticklandii str. DSM 519<br>chromosome  | FP565809.1     | 218088-218170   | ACATAATAAGAGCAGATGAACTATAGCTAGATATGGACGCCTTACGCTATAGGGATGCAGTGGCGTAACCGGCTGAATTATAA     |
| Clostridium tetani E88                              | AE015927.1     | 474745-474827   | ATTTTAAGAGGAAATTTTGAACATATATACTTATTTGGGCACCTTGTATATAGGGAGTTAGTAGTGCAACCGACCTTGATTAAT    |
|                                                     |                |                 |                                                                                         |
| Compost metagenome contig19871                      | ADGO01019795.1 | 335-417         | ACCGACCCGGCGGCAATGACACACGGTCCGTATCTGGGCACCTGGGCCGTGTCGAGCTAGTGGTGCAACCGGCCGACATCCGT     |
|                                                     |                |                 |                                                                                         |
| Dehalococcoides sp. CBDB1 complete<br>genome        | AJ965256.1     | 1260708-1260792 | AAATTAAGGGGAAGCGTTGAGCCGCTACCCATATGTGGTTCACCTCGGATAGCGGGGAGCTAATAGTGAAACCGGCCCTTTAGGGG  |
| Dehalococcoides sp. GT                              | CP001924.1     | 1225340-1225424 | AAATTAAGGGGAAGCGTTGAGCCGCTACCCATATGTGGTTCACCTCGGATAGCGGGGAGCTAATAGTGAAACCGGCCCTTTAGGGG  |
| Dehalococcoides sp. VS                              | CP001827.1     | 205125-205209   | AAAATTAAGGGGAAGCGTTGAGCCGCTACCCATATTTGGTTCACCTCGGATAGCGGGGAGCTAATAGTGAAACCGGCCCTTTAGGGG |
|                                                     |                |                 |                                                                                         |

|                                                 |            |                 |                                                                                                                   |
|-------------------------------------------------|------------|-----------------|-------------------------------------------------------------------------------------------------------------------|
| Dehalogenimonas<br>lykanthroporepellens BL-DC-9 | CP002084.1 | 961690-961774   | ATAACAACAGGAAGCGTTGAACCGTCACCTGTAATGTGGTCACTTGGGTGACGGGAGCCCCTAGTGAAACCGGCCTGATATTTT                              |
|                                                 |            |                 |                                                                                                                   |
| Deinococcus deserti VCD115                      | CP001114.1 | 488794-488900   | AAGCACTCGGGACGCGATGACCCCCACCCCTCTCCGGCGCCTGTCAATTCGGGTGCACGCGGTACACCTCAGGTGGGGCGAGCCAGTGGT<br>GAGACCGACCCGTGTGGGG |
| Deinococcus deserti VCD115                      | CP001114.1 | 1034721-1034638 | ACTGTACTGAGATGCATCGACGCTTGCCCTGTATACGGTCACCTGGGTCAAGCCGAGCGAATGGTGAGCCCGACTCAATGGAGA                              |
| Deinococcus deserti VCD115                      | CP001114.1 | 1166571-1166489 | AACTAAAGGGGAGCTATGAACGCCGTCTTTTAACCCGGTCACCTGGGACGGCTGGAGCAGTGGTGAGACCGACCCAGGAGGC                                |
| Deinococcus deserti VCD115                      | CP001114.1 | 617472-617555   | CACAACTTGGTAGGCTAAGAAACTCGTCCTGTAACAGGTCACCTGGGGCGAGTAGAGCTAGTGGTGATTCTACCCAGGTTAAG                               |
| Deinococcus deserti VCD115 plasmid<br>2         | CP001116.1 | 102374-102291   | ATAACGGCAGCAAGCAATGAAATGTTTCGATGTAACCGGGCACCTATCGAACATGGAGCTAGTGGTGCGACCGACGTTTCATACG                             |
| Deinococcus deserti VCD115 plasmid<br>2         | CP001116.1 | 87607-87689     | CTGATGGGGAGCGCGAAGAGCCCTGTCTGTATTCCGGGCACCTGGGACAGGGGGAGCTAGTGGTGCGACCGGCTTTTCGTCTG                               |
| Deinococcus geothermali DSM<br>11300            | CP000359.1 | 298588-298671   | TTCTTGTTCCGGGGCGAAGAGGCGTGTGGTGTATCCGGGCACCTGCCACACGCGGAGCCAGTGGTGCGACCGACGAACCGTGAA                              |
| Deinococcus maricopenis DSM<br>21211            | CP002454.1 | 2352368-2352449 | CTTCACAGACGAGGCAAGGAAACGCGCAGTGCATCCGGGCACCTGCTGCGCGTCGAGCCAGTGGTGCGACCGACGTCCTCCCG                               |
| Deinococcus maricopenis DSM<br>21211            | CP002454.1 | 2009832-2009748 | CTGACTGGTAGAGGCTGCGACGCGCGCTCCCGTACTCGGGCACCTGGGACGCGCAGAGCCAGTGGTGCGACCGACTATTGGTTCC                             |
| Deinococcus maricopenis DSM<br>21211            | CP002454.1 | 388333-388413   | CTGAACCAGCGACGCGACGACTCCCGTTCTCCATCCGGGCACCTGGAACGGGCCGAGCCAGTGGTGCGCCACCGCTTCGC                                  |
| Deinococcus maricopenis DSM<br>21211            | CP002454.1 | 1046404-1046488 | AACTAGTTCAGGAGCAATGAAACATCTGGCGTTACACGGGCGCCTGCCAGATGCGGAGCGAGTGGCGCGACCGACAGAACCGAGG                             |
| Deinococcus maricopenis DSM<br>21211            | CP002454.1 | 314698-314782   | CTGGCGAACAGATGCAAAGATCCTCGTCCCGTAATTCGGGCACCTCAGGCGAGGGGAGCAAGTGGTGCGACCGGCTCTTCGTTTC                             |
| Deinococcus maricopenis DSM                     | CP002454.1 | 445427-445510   | TTCAACCTGCGACGCAACGACGTCTGTTTCAGTATCCGGGCACCTTGAACGGACCGAGCCAGTGGTGCGCCACCGGGTCATCA                               |



|                                              |                |                 |                                                                                        |
|----------------------------------------------|----------------|-----------------|----------------------------------------------------------------------------------------|
| 21211                                        |                |                 |                                                                                        |
| Deinococcus proteolyticus MRP                | CP002536.1     | 513083-513167   | TCTGTGGAGGGAGGTGATGATTCCCGTCCTGTAATCCGGGCACCTCGGACGGGAGGAGCCAGTGGTGCGACCGACTTTTCGTTGC  |
| Deinococcus radiodurans R1<br>chromosome 1   | AE000513.1     | 1919839-1919755 | CTGTGCAAGAGACGCGATGAATCCCGCCCTGTAATTCGGGCACCTCGGACGGGAGGAGCAAGTGGTGCGACCGGCTTTTCGTTGG  |
| Deinococcus radiodurans R1<br>chromosome 1   | AE000513.1     | 692045-692129   | AAGTGGTTTTGAAGCAGGGAAGCATCTGACGCATTTCGGGCGCCTTGTCAGATGTGGAGCGAGTGGCGCGACCGGCAAAGCTGTGG |
|                                              |                |                 |                                                                                        |
| Desulfosporosinus sp. OT<br>TOU.assembly.134 | AGAF01000038.1 | 1437-1354       | AAGCATGTGTGAGACAATGATTTGCAGTTAGAATTGGTCACGTTAAATTGCAAGGAGTCAAACGTGAACCCGGGCACACTCATAT  |
| Desulfosporosinus sp. OT<br>TOU.assembly.26  | AGAF01000182.1 | 569-487         | TGTAAAGAGGAAATTTTGAAGCATGTATCTTATTTGGGCGCTTGATACATGTGGAGTAAGTAGCGCAACCGGCCTGGTTTATA    |
|                                              |                |                 |                                                                                        |
| Desulfotomaculum acetoxidans DSM<br>771      | CP001720.1     | 3609158-3609242 | ATTTATACGGGATACTATGAAGTGAACCTCTATAATTTGGGCATCTGGGGTTTACTGAGTAAGTGATGCAACCGGCCACTATTTTA |
| Desulfotomaculum acetoxidans DSM<br>771      | CP001720.1     | 3973350-3973434 | GAGTTTCTTGGGAACATATGACATCAACTCTTATCTGGGCATCTTAGAGTTGATTGAGTTAGTGATGCAACCGACCTTGAAGAAA  |
| Desulfotomaculum kuznetsovii DSM<br>6115     | CP002770.1     | 2086514-2086431 | TATAAGAGCGGAGGCCGTGAACCGCTGCCTGTAACCTGGGCGCCTGGGCAGCGGGGAGCCGCTGGCGCACCCGGCCGCTTACCAG  |
| Desulfotomaculum kuznetsovii DSM<br>6115     | CP002770.1     | 2268897-2268980 | GTAAAAAGGTGAGCGATGAACCTGCGGTCTGTAACGTGGGCGCCTTGGACCGGAGTGAGCCAGTAGCGCAACCGCCGCTGCCAGT  |
|                                              |                |                 |                                                                                        |
| Dethiobacter alkaliphilus AHT 1 ctg22        | ACJM01000003.1 | 182391-182476   | ATCAACCATAGAAGCAATGACCAACCTCTTACAAATCGGGCGCCTTGAGAGGTTGAGAGCTGGCGGCGCAACCGGCTATGGCAGGC |
| Dethiobacter alkaliphilus AHT 1 ctg28        | ACJM01000007.1 | 48473-48391     | AATTTTGTGGGGGCAATGATTTTGGGCTGATTGGACGCTTTGCCTGGAATGAGCCGGTAGCGTAACCGACCACTTGTGGT       |
| Dethiobacter alkaliphilus AHT 1 ctg36        | ACJM01000005.1 | 89134-89216     | CCCGTTTATGGGGGCTGTGATTCAGGGCTTATATGGACGCTTTGCCCGGGAGGAGCCAGTAGCGTAACCGACCATATATTAA     |
| Dethiobacter alkaliphilus AHT 1 ctg36        | ACJM01000005.1 | 88429-88511     | TTAGTTCTTGGGGGCTGTGATTCAGGGCTTATATGGACGCTTTGCCCTGGGGGAGCCAGTAGCGTAACCGACCACTTATGGT     |

|                                                               |                |             |                                                                                                                |
|---------------------------------------------------------------|----------------|-------------|----------------------------------------------------------------------------------------------------------------|
| Dethiobacter alkaliphilus AHT 1 ctg9                          | ACJM01000004.1 | 62456-62538 | CAAGTGTGCGGAATCAATGACCGCGACTCTCATTTGGTCACTTTAGGGTCGCGCGAGATAGAGTGAAACCGGCTGCACACGGG                            |
|                                                               |                |             |                                                                                                                |
| Environmental sequence<br>2662324_fasta.screen.Contig17117    | AAFX01105197.1 | 106-204     | GTTAGTTCGGGCGGCGAAGATCCGGTGACTGGCATGGTCGCTCCATCCTTTCGGGATACGGTCACTGAGGAGCCAGTAGCGAAACCGGC<br>CCTATGGGTC        |
| Environmental sequence<br>2662324_fasta.screen.Contig5218     | AAFX01131626.1 | 2-107       | TATTGTTTGGGATGCGTAGACCCCGAGACGAAATCTGGTCGCAAAACCTCCATGATAGGTGGGTGTAGTCTCTGGTGAGCAATAGCGA<br>AACCGACCCTGCCCCGGG |
| Environmental sequence<br>XZS39253.g1                         | AAFX01078109.1 | 475-391     | TCACCCTTCAGAGGCTTAGATGCCTACCCCGCAACTTGGGCGCTTGGGGTACGCGGAGCCAGTAGCGCAACCGGCCGAGGGCTTC                          |
| Environmental sequence<br>XZS76186.x1                         | AAFX01082705.1 | 413-331     | ATCGATTTCGGATGCCTTGATCCGACCGCTGAATGTGGGCACTTAGGCGGCCGGGAGCAGGTAGTGCAACCGACCGTTCCGC                             |
| Environmental sequence<br>XZS84852.b1                         | AAFX01050824.1 | 22-122      | CGATTCTGTGGAGGCTGATCCATAGCGGTACTGGTCGCAGCTCTTCTGGATAGAAAGAACGCTATTGGGGAGCCAGTTGCGAAACCG<br>GCCACGTAGCCG        |
| Environmental sequence<br>XZS94218.g1                         | AAFX01024083.1 | 557-455     | CACCACTGTGGACGCTTTGATCCGGTGCTTGATTGGTCGCTTAACGTCTGGAACCTTTGACGAGGGCGCCGGGGAGCGAGTAGCGAA<br>ACCGGCCACTGGTA      |
|                                                               |                |             |                                                                                                                |
| Epibiont metagenome<br>Alv_LSA_172_B08.y01                    | AAUQ01013182.1 | 230-147     | ACAAACTTGGGATGCGTCGAAGTCCAGTTAAATTTGGTTGCCATAGACTGGATGGAGCAAATGGCAAACCGGCCCAAGTGATT                            |
|                                                               |                |             |                                                                                                                |
| Freshwater sediment metagenome<br>lwFormaldehyde_BCIB32736_g1 | ABSN01055388.1 | 86-2        | GTACGCGTGGGAGGCTCTGACACGCGGTCCAAACCCCGCCGCCGGGACCGCGCTGAGCCACTGGCGGAGACCGACCCGCGCATGC                          |
| Freshwater sediment metagenome<br>lwFormate_BCIX11931_g1      | ABSO01013207.1 | 629-713     | ACGGGTGCGGGAGGCGATGACACGCGGCTCGCATGACGGCCGCCTGAGCCGCGCCGAGCCACTGGCGGAGACCGAGCCGCTCTGAT                         |
| Freshwater sediment metagenome<br>lwFormate_BCIX16035_g1      | ABSO01016797.1 | 548-464     | CCGCGTGCGGGAGGTTGAGACGCGCGGTCCACACCCCGCCGCCGGGACCGCGCCGAGCCACTGGCGGAGACCGACCCGCGCTGTC                          |
| Freshwater sediment metagenome                                | ABSO01017373.1 | 256-341     | ACGCACACGGGAGGCGATGACGTGCGGGCTTGACACCCTGGTCGCCTGAGCCGCGCCGAGCCACTGGCGGAGACCGACCCGCTTGTG                        |

|                                                           |                |           |                                                                                                |
|-----------------------------------------------------------|----------------|-----------|------------------------------------------------------------------------------------------------|
| lwFormate_BCIX16653_b1                                    |                |           |                                                                                                |
| Freshwater sediment metagenome<br>lwFormate_BCIX3308_g1   | ABSO01005747.1 | 296-213   | GTCAATATCGGACGCGCGATGCCTCGCCTGAAATGGGCACCTAGGGTGAGGCGGAGCGAGTAGTGCAACCGACCGACCCCAGT            |
| Freshwater sediment metagenome<br>lwFormate_BCIX8145_b1   | ABSO01010315.1 | 425-508   | AAGACGCTCGGACGCGCAGATGCCTCTCCTGAAATGGGCACCTAGGGAGAAGCGGAGCGAGTAGTGCAACCGACCGACCTAATC           |
| Freshwater sediment metagenome<br>lwFormate_BCIX9830_g1   | ABSO01020038.1 | 334-252   | TCGTACGTGGGAGGCTGTGACGCGCGGCCATGCAATGGGCGCCCGGACCGCGCCGAGCCACTGGCGAGACCGGCCTGCGCGA             |
| Freshwater sediment metagenome<br>lwMethane_BCGO16849_y1  | ABSP01028201.1 | 593-677   | TCGTACGCGGGAGGCTGAGACACGCGGTCCGAATTCGTGCCCGCGGGACCGCGCCGAGCCACTGGCGAGACCGACCCACGCTGGC          |
| Freshwater sediment metagenome<br>lwMethenol_BCHA14774_x1 | ABSQ01022675.1 | 554-638   | GGGCGAGCGGGAGGCTCTGACGTGCGGNCCACACCCTGGCCGCCGGGACTGCGTCGAGCCACTGGCGGACCCGACCCGCGCATCA          |
| Freshwater sediment metagenome<br>lwMethenol_BCHA21047_x1 | ABSQ01032870.1 | 364-280   | GTCGTGCGGGAGGCCATGACACGCGGCCCGAACCCCGGCCCGGGACCGCGCCGAGCCACTGGCGAGACCGACCCGCGAATGC             |
| Freshwater sediment metagenome<br>lwMethenol_BCHA27458_x1 | ABSQ01040898.1 | 118-201   | TCCGCAGCGGGAAGCTCTGACGCGCGGCCATCTACGGCCGCCGGGACCGCGCCGAGCCACTGGCGAGACCGACCCGCGAGTCA            |
| Freshwater sediment metagenome<br>lwMethenol_C1513        | ABSQ01001513.1 | 702-619   | CGGTCTGCGGGAGGCGATGACGCGCGGGCCAATGCCGGCCCGGGACCGCGCGGAGCCACTGGCGAGACCGACCCGCGGGTGC             |
| Freshwater sediment metagenome<br>lwMethenol_C2548        | ABSQ01002548.1 | 1348-1264 | CCGAAAGCGGGAGGCTACGACGCACGGTCCACACTCCGGCCGCCGGGACCGCGCCGAGCCACTGGCGAGACCGACCCGCGTACGT          |
| Freshwater sediment metagenome<br>lwMethenol_C2845        | ABSQ01002845.1 | 828-909   | CGGTTGGCGGGAGGCTCTGACACGCGGTCCATACCCGGCCGCCGGGACCGCGCCGAGCTACTGGCGAGACCGACCCGCGCCG             |
| Freshwater sediment metagenome<br>lwMethenol_C298         | ABSQ01000298.1 | 1345-1256 | CCACAAACGGGAGGCCGTGATCCGCCGGACGTACCACTTCGGCCACCGCGGTCCGGCGGGGAGCCACTGGTGAGACCGGCCCGCGGG<br>CCG |
| Freshwater sediment metagenome<br>lwMethylamine_C5836     | ABSR01005836.1 | 444-360   | CGGTTGGCGGGAGGCTATGACACGCGGCCATACTCTGGCCGCCCGGACCGCGCCGAGCCACTGGCGAGACCGACCCGTTGGATC           |

|                                          |                 |                 |                                                                                         |
|------------------------------------------|-----------------|-----------------|-----------------------------------------------------------------------------------------|
| Geodermatophilus obscurus DSM 43160      | CP001867.1      | 492880-492797   | CACGAACGGGTAGTGATGATCCGCCGGGCGCACCTGGTCGCCATAGCCCGCGGGGAGCAGAGGCGAAACCGGGCCCGTCCTAG     |
|                                          |                 |                 |                                                                                         |
| Halanaerobium hydrogeniformans           | CP002304.1      | 1331049-1331135 | AAACTTATTGGATGCTGAGATCTGCCAGGATAAAATGGTCACCAGATTAATTGGCAGTGAGCTAAATGGTGAAACCGGCCAAAATTG |
|                                          |                 |                 |                                                                                         |
| Halothermothrix orenii H 168             | CP001098.1      | 2206138-2206055 | TATTGAATGGGAAGCTATGAACTCTTCTTTGTACGTGGTCACTTGAAGGAGAGGGAGCTAGTAGTGAAACCGCCCCGACCGGGG    |
|                                          |                 |                 |                                                                                         |
| Hot springs metagenome ctg_1106445192553 | ADKJ01000386.1  | 1697-1612       | CCTCTGAGGGGAGGCGATGAACCCTCGAGCCCAAGATGGGCGCCATGGGACGAGGGGGAGCCAGTGGCGCAACCGGCCCTAAAGC   |
|                                          |                 |                 |                                                                                         |
| Human gut metagenome DNA                 | BAAW01001404.1  | 566-484         | ATAAATCTGGAAGTAATGATAAATCTCTTTATTTGGGCACTTTGAGGATTTTGAAGTAGTAGTGCAACCCGCCAACAATTAA      |
|                                          |                 |                 |                                                                                         |
| Marine metagenome 1096626368917          | AACY020292692.1 | 343-428         | GAGGCGTCCGGAGGCGATGACCCGCTGATCCCCATTTGGGCATCAAGGGACGCGGCGAGCCAGTGATGCAACCGGCCGGACGGCTA  |
| Marine metagenome 1096626368917          | AACY020292692.1 | 175-258         | TCGCGATTTCGAGGGCGATGACGCTCGTTCTGCAACATGGGCGCTTGGAACGAGCCGAGCCAGTAGCGCAACCGATCGGTCGACG   |
| Marine metagenome ctg_1101668569280      | AACY023761929.1 | 1009-1091       | ATAATTTGGTGGGCGTTGATGTGCCCTTTGTATCTGGTCGCTTGAGGGGTACGGAGCCAATAGCGAAACCGCCGCGTCATAG      |
|                                          |                 |                 |                                                                                         |
| Marinithermus hydrothermalis DSM 14884   | CP002630.1      | 142650-142566   | GGAGCGTTCGGAGGCGATGAACCGTACTCCCAACCTGGGCACCAAGGGATACGGGGAGCCAGTGGTGCAACCGGCCGAACGCCGT   |
| Marinithermus hydrothermalis DSM 14884   | CP002630.1      | 1070287-1070204 | GCTTCCCCTAGCGGCGAGGAAGCCTGTCTGTACGTGGGCGCCTGGGGCAGGTGGAGCCAGTGGCGCAACCGGCTAGGGGATCT     |
| Marinithermus hydrothermalis DSM 14884   | CP002630.1      | 142912-142999   | GGAGCCGTAAGCGGCGATGACCCGCCCATTCCTGCGGCGCAAGGGAGGGCGGCGAGCCAGTGGCGCGACCGGCTTGCGGCCTC     |
| Marinithermus hydrothermalis DSM         | CP002630.1      | 142803-142719   | CGTCCCCTCGGAAGCGATGAAGCCTGTCTGACGTTGGGCGCCTGGGGCAGGTGGAGCGGGTGGCGCAACCGGCCGAGGGCGTA     |

|                                        |                |                 |                                                                                               |
|----------------------------------------|----------------|-----------------|-----------------------------------------------------------------------------------------------|
| 14884                                  |                |                 |                                                                                               |
| Marinithermus hydrothermalis DSM 14884 | CP002630.1     | 2135386-2135469 | CGGGCCCTTGGAGGCGATGAACCCCTGCCCGTGAACCTGGGCGCCTGGGGCGGGGGAGCCAGTGGCGCAACCGGCCAAGGGAGGG         |
|                                        |                |                 |                                                                                               |
| Meiothermus ruber DSM 1279             | CP001743.1     | 2770688-2770773 | ACCAAGTTCGGAGGTGATGATCCGTGATTCCCAATCTGGGCACCAAGGGAAACGGGGAGCCAGTGGTGCAACCGGCCGAACCCAAA        |
| Meiothermus silvanus DSM 9946          | CP002042.1     | 3024809-3024724 | GGGGGGTTCGGAGGCGACGAACCTGTGTACCCAATATGGGCACCAAGGGGCACAGGGAGCTAGTGGTGCAACCGGCCGAACACCGC        |
|                                        |                |                 |                                                                                               |
| Mine drainage metagenome Contig10238   | ACXJ01008876.1 | 95-14           | ATCCGTTAGTGAAGCGTTGAATCGTTCGGTTGCATGGTCGCCTTACCGAGCGGTGAGCTAATGGCGAAACCGGCCTTTGTT             |
| Mine drainage metagenome Contig6680    | ACXJ01005483.1 | 595-679         | ATAGATGGGTAATGCAATGATCCCTGGGTGCGCAATGGTCGCTTTAGCCCAGGGGGAGTAAGTAGCGAAACCGGTACCCATAAAA         |
|                                        |                |                 |                                                                                               |
| Oceanithermus profundus DSM 14977      | CP002361.1     | 164383-164467   | TGAAGAGCAGGAGGCAGTGAACCGTCTTCCGCAACGCGGGCGCCTGGAAGACGGGGAGCCAGTGGCGCGACCGGCCTCGTCCGCG         |
| Oceanithermus profundus DSM 14977      | CP002361.1     | 232155-232069   | TCAAATCTTGGAGGCGATGAACCGTGTGTCCCAATCTGGGCACCAAGGGGCACGGGGAGCCAGTGGTGCAACCGGCCAAGAAGATG        |
| Oceanithermus profundus DSM 14977      | CP002361.1     | 232367-232455   | TGTGTAGTTGGAGGCGATGACCCGCCAGGTCCCTATACGGGCGCCAAGGGACGAGCGGCGAGCCAGTGGCGCGACCGACCAAACCCCT<br>A |
| Ornithinibacillus sp. TW25 contig00142 | AEWH01000068.1 | 172333-172251   | ACTTATGTAGGAGGCTAGGAATAATTACCTGTATTTGGGCACTTGGGTAGTTAGGAGCCAGTAGTGCAACCGACCAACTATGT           |
|                                        |                |                 |                                                                                               |
| Paenibacillus elgii B69 Contig4        | AFHW01000004.1 | 83677-83757     | GAGAACTAGGTAGGCAATGAGTTCGAATCTGTATATGGGCACTTGGATTCTGAAGGAGCTAGTAGTGCAACCGGACCATCTT            |
| Paenibacillus elgii B69 Contig94       | AFHW01000094.1 | 32614-32695     | AAACACATGGTAAGCGATGATTTTGAATCTGTATCTGGGCACTTGGATTTCGACGGAGCTAGTAGTGCAACCGGACCACCTTT           |
| Paenibacillus mucilaginosus KNP414     | CP002869.1     | 472797-472880   | ATACGACATGGGAGCTATGACTTTGAATCCGTATCTGGGCACTTGGATTCAAACGAGCCAGTAGTGCAACCGACCATCTTCCTT          |
| Paenibacillus mucilaginosus KNP414     | CP002869.1     | 6120416-6120499 | AAAAGTTTTGGGAGCTATGACTTCGACATCCGCAACGTGGGCACTTGGATGCGAACGAGCTGGTAGTGCAACCGACCATCTTCT          |
|                                        |                |                 |                                                                                               |
| Pelotomaculum thermopropionicum SI     | AP009389.1     | 2908378-2908465 | GAGATAGTGTGAAGCAGTGATCTTGCAGCTAATATGGTCACCTTTTACGGCTGCAAGTGAGCTAATAGTGAAACCGGCACACTGATGC      |

|                                                          |                |                 |                                                                                       |
|----------------------------------------------------------|----------------|-----------------|---------------------------------------------------------------------------------------|
| DNA                                                      |                |                 |                                                                                       |
|                                                          |                |                 |                                                                                       |
| Solibacillus silvestris StLB046 DNA                      | AP012157.1     | 868334-868251   | TTTACAATGGGAGACTATGAAGTACATCCTTTAATTGGGCACCTTGGATGTATGGAGTCAGTGGTGCAACCGGCCTCACAAACAT |
|                                                          |                |                 |                                                                                       |
| Sphaerobacter thermophilus DSM<br>20745 chromosome 1     | CP001823.1     | 2685771-2685688 | CTGACCTGCGGACGTGATGACCCCTGTGGTGAGCATGGACGCCGTGCCACCGGCGAGCGAGTGCGGTACCCGGCCTCGGTCAG   |
| Sphaerobacter thermophilus DSM<br>20745 chromosome 2     | CP001824.1     | 1154934-1155017 | CGTGAGCGCGGAGGCGATGACGCGCGGGCTGTAATTTGGGCACCTCGCCCGCGCCGAGCCTGGGGTGCAACCGGCCGGCTAAGA  |
| Sphaerobacter thermophilus DSM<br>20745 chromosome 2     | CP001824.1     | 1154769-1154853 | CGAAACGTCGGAGACGTTGAGGCGCAGGCTGTAATCTGGGCACCTCGCCTGCGCCGAGTCTGAGGTGCAACCGGCCGACCCTTTG |
|                                                          |                |                 |                                                                                       |
| Streptococcus sobrinus TCI-157<br>contig00390            | AGHO01000390.1 | 4173-4091       | TGAAAGGTAGAAAGCTATGATTAATCAACTTATTTGGGCGCTTTGTTGATTATGAGCTACTAGCGCAACCGGCTAACCAAACCT  |
|                                                          |                |                 |                                                                                       |
| Thermoanaerobacter brockii subsp.<br>finnii Ako-1        | CP002466.1     | 1121256-1121339 | ATTTTATAAAGAGTAGATGAAGTGAGGCTATATGTGGGCACCTTATGCCTCACGGATACAGTGGTGCAACCGGCTTTATGTCGG  |
| Thermoanaerobacter ethanolicus<br>CCSD1 ctg00026         | ACXY01000031.1 | 16323-16240     | ATTTTATAAAGAGTAGATGAAGTGAGGCTATATGTGGGCACCTTATGCCTCACGGATACAGTGGTGCAACCGGCTTTATGTCGG  |
| Thermoanaerobacter ethanolicus JW<br>200 ctg1020         | AEYS01000008.1 | 66877-66959     | ATTTTATAAAGAGTAGATGAAGTGAGGCTATATGTGGGCACCTTATGCCTCACGGATACAGTAGTGCAACCGGCTTTATGTCGG  |
| Thermoanaerobacter italicus Ab9                          | CP001936.1     | 1106970-1107052 | ATTTTATAAAGAGAGATGAAGTGAGGCTATAGGGGGGCACCTTACGCCTCATGGATTGAATGGTGCAACCGGCTTTATGTCGG   |
| Thermoanaerobacter mathranii subsp.<br>mathranii str. A3 | CP002032.1     | 1134808-1134888 | ATTTTATAGAGAGATGAAGTGAGGCTATAGGGGGGCACCTTACGCCTCATGGATTGAATGGTGCAACCGGCTTTATGTCGG     |
| Thermoanaerobacter pseudethanolicus<br>ATCC 33223        | CP000924.1     | 1129065-1129148 | ATTTTATAAAGAGTAGATGAAGTGAGGCTATATGTGGGCACCTTATGCCTCACGGATACAGTGGTGCAACCGGCTTTATGTCGG  |

|                                                                            |                |                 |                                                                                         |
|----------------------------------------------------------------------------|----------------|-----------------|-----------------------------------------------------------------------------------------|
| Thermoanaerobacter sp. X513                                                | CP002210.1     | 1378865-1378782 | ATTTTATAAAGAGTAGATGAAGTGAGGCTATATGTGGGCACCTTTATGCCTCACGGATACAGTGGTGCAACCGGCTTTATGTCGG   |
| Thermoanaerobacter sp. X514                                                | CP000923.1     | 1535517-1535600 | ATTTTATAAAGAGTAGATGAAGTGAGGCTATATGTGGGCACCTTTATGCCTCACGGATACAGTGGTGCAACCGGCTTTATGTCGG   |
| Thermoanaerobacter sp. X561 ctg62                                          | ACXP02000002.1 | 172572-172655   | ATTTTATAAAGAGTAGATGAAGTGAGGCTATATGTGGGCACCTTTATGCCTCACGGATACAGTGGTGCAACCGGCTTTATGTCGG   |
| Thermoanaerobacter wiegelsii R18.B1                                        | CP002991.1     | 1237154-1237236 | ATTTTATAAAGAGTAGATGAAGTGAGGCTATATGCGGGCACCTTTATGCCTCACGGATACAGTGGTGCAACCGGCTTTATGTCGG   |
| Thermoanaerobacterium<br>saccharolyticum strain JW/SL-YS485<br>PilB (pilB) | GU479453.1     | 3423-3505       | GATTTGATTGAGATAGATGATGTGAGTCTATATTTGGGCGCTTTATGACTCATTGATATAGTGGCGCAACCGGCATCATTGTC     |
| Thermoanaerobacterium<br>thermosaccharolyticum DSM 571                     | CP002171.1     | 2615418-2615336 | GATAAAATAGGATTCTATGAAGTATAACCTGTATTTGGGCACCTGGGTTATGCGGAGATAGTGGTGCAACCGGCCGTAGTATC     |
| Thermoanaerobacterium<br>thermosaccharolyticum DSM 571                     | CP002171.1     | 1298918-1298999 | GAATTGATAGACGTAGATGATGTGAGTCTATATTTGGGCGCTTTACGACTCATTGATATAGTGGCGCAACCGGCATCATTGT      |
| Thermoanaerobacterium<br>xylanolyticum LX-11                               | CP002739.1     | 2362968-2362885 | AAATATATAGGATTCTGTGAAGCATAACCTGTATTTGGGCACCTGGGTTATGCGGAGATAGTGGTGCAACCGGCCGTAGTTTTT    |
| Thermoanaerobacterium<br>xylanolyticum LX-11                               | CP002739.1     | 1231285-1231367 | GATTTGATTGAGATAGATGATGTGAGTCTATATTTGGGCGCTTTATGACTCATTGATATAGTGGCGCAACCGGCATCATTGTC     |
|                                                                            |                |                 |                                                                                         |
| Thermobaculum terrenum ATCC<br>BAA-798 chromosome 1                        | CP001825.1     | 388010-388096   | AATTAGCGTAGAGGCGACGAAGTCCGCTTACCTATATGGGCACCATGGGAGCGGATGGAGCCACTGGTGCAACCGGCTACTGAGAAG |
| Thermomicrobium roseum DSM 5159<br>plasmid                                 | CP001276.1     | 419946-420032   | CGACACCCCGGAGGCGAAGAAGCGCTGCCTGAGCGTTGGGCGCCAGTGGGCAGCGTGGAGCCAGTGGCGCACCCGGCCGGGATATCC |
|                                                                            |                |                 |                                                                                         |
| Thermosinus carboxydvorans Nor1<br>ctg50                                   | AAWL01000006.1 | 67971-67888     | ACTGCAATGGGTGTGATGAAGTCCGGACAGTAATGTGGGCACCTAGTCCGGACCGAGCAAGTAGTGCAACCGACCAGATGCAAA    |
|                                                                            |                |                 |                                                                                         |
| Thermus aquaticus Y51MC23 ctg62                                            | ABVK02000002.1 | 96520-96603     | AGGCACCTCGGAGGCGACGAAGCCTGTCCTGCAATCTGGGCGCCTGGGACAGGTGGAGCCAGTGGCGCAACCGGCCGAGGGCGG    |

|                                             |                |                 |                                                                                            |
|---------------------------------------------|----------------|-----------------|--------------------------------------------------------------------------------------------|
| Thermus aquaticus Y51MC23 ctg62             | ABVK02000002.1 | 96672-96757     | AGGGCGTTCGGAGGCGAGGAACCGTGATACCAAGATGGGCGCCAAGGGACACGGGGAGCCAGTGGCGCAACCGGCCGGACGCTAT      |
| Thermus aquaticus Y51MC23 ctg74             | ABVK02000011.1 | 69647-69731     | CCTCTGAGGGGAGGCGATGAACCCCTCGAGCCCAAGATGGGCGCCATGGGCCGAGGGGAGCCAGTGGCGCAACCGGCCCTAAAGC      |
| Thermus scotoductus SA-01                   | CP001962.1     | 1792927-1792844 | AGGTACCTCGGAGGCGAAGAAGCCTGCCCTGTAGTTGGGCGCCTGGGGCAGGTGGAGCCAGTGGCGCAACCGGCTGAGGGTTAG       |
| Thermus scotoductus SA-01                   | CP001962.1     | 1638632-1638717 | AGGGCGTTCGGAGGCGAGGAACCGTGAGTCCCAAGATGGGCGCCAAGGGACACGGGGAGCCAGTGGCGCAACCGGCCGGACGCATG     |
| Thermus scotoductus SA-01                   | CP001962.1     | 1792779-1792694 | AGGGCGTTCGGAGGCGATGAACCGTGGAACCCAAGATGGGCGCCAAGGGACACGGGGAGCCAGTGGCGCAACCGGCCGAACGTCTGA    |
| Thermus scotoductus SA-01                   | CP001962.1     | 1638487-1638571 | AGGCACCTCGGAGGCGAGGAAGCCTGCCCTGCAATCTGGGCGCCTGGGGCAGGTGGAGCCAGTGGCGCAACCGGCCGAGGGCGGT      |
| Thermus scotoductus SA-01                   | CP001962.1     | 1792216-1792129 | GCCTTGAGGGGAGGCGAGGAACCCCCGATCTCCCAGATGGGCGCCAAGGAGCGGGGGGAGCCAGTGGCGCAACCGGCCCTAATCC<br>T |
|                                             |                |                 |                                                                                            |
| Truepera radiovictrix DSM 17093             | CP002049.1     | 2322363-2322277 | CCGCCCCCTCGGAGGCTTTGACACCCGTTTCTGTATATGGGCGCTTGGGAGCGGGTCGAGCCAGTAGCGCAACCGGCCGAGGGGAGC    |
|                                             |                |                 |                                                                                            |
| Turicibacter sanguinis PC909<br>contig00019 | ADMN01000014.1 | 3259-3334       | ATTTTAGTTGGAAATGTTGAAATATGTCCTGTATTTGGGTACCTGGGACATATGGAGTTATTGGTACAACCTGTAGT              |
| Turicibacter sanguinis PC909<br>contig00029 | ADMN01000011.1 | 58945-58863     | GAATTAAAAGAAACGATGAAGTATATTCTGTATTTGGGCACCTGGAATATATGGAGTTAGTGGTGCAACCGGCTTTATAAATT        |
| Turicibacter sanguinis PC909<br>contig00047 | ADMN01000018.1 | 10516-10597     | TTCTGCCTAAGAATCGATGAAATATATTCTGTATATGGGTACCTGGAATATATCGAGATATTGGTACAACCGGCTTTTTTAAA        |
| Turicibacter sp. HGF1 contig00008           | AEXQ01000067.1 | 3225-3308       | ATTTTAGTTAGAAATGTTGAAATATGTCCTGTATTTGGGTACCTGGGGCATATGGAGTTATTGGTACAACCGGCTGCCTTTTTT       |
| Turicibacter sp. HGF1 contig00092           | AEXQ01000089.1 | 3700-3619       | TTCTGCCTAAGAATCGATGAAATATATTCTGTATATGGGTACCTGGAATATATCGAGATATTGGTACAACCGGCTTTTTTAAA        |

\*The original RNA sequences were downloaded from Rfam FTP site
